# Supplementary material for: Automated hippocampal unfolding for morphometry and subfield segmentation with HippUnfold
Source: PubMed Central journal article supplement (PMC9831605; doi:10.7554/elife.77945), 2022-12-15

hemi=R,subject=6086470

MRI

hippunfoldT1

ashs

freesurfer

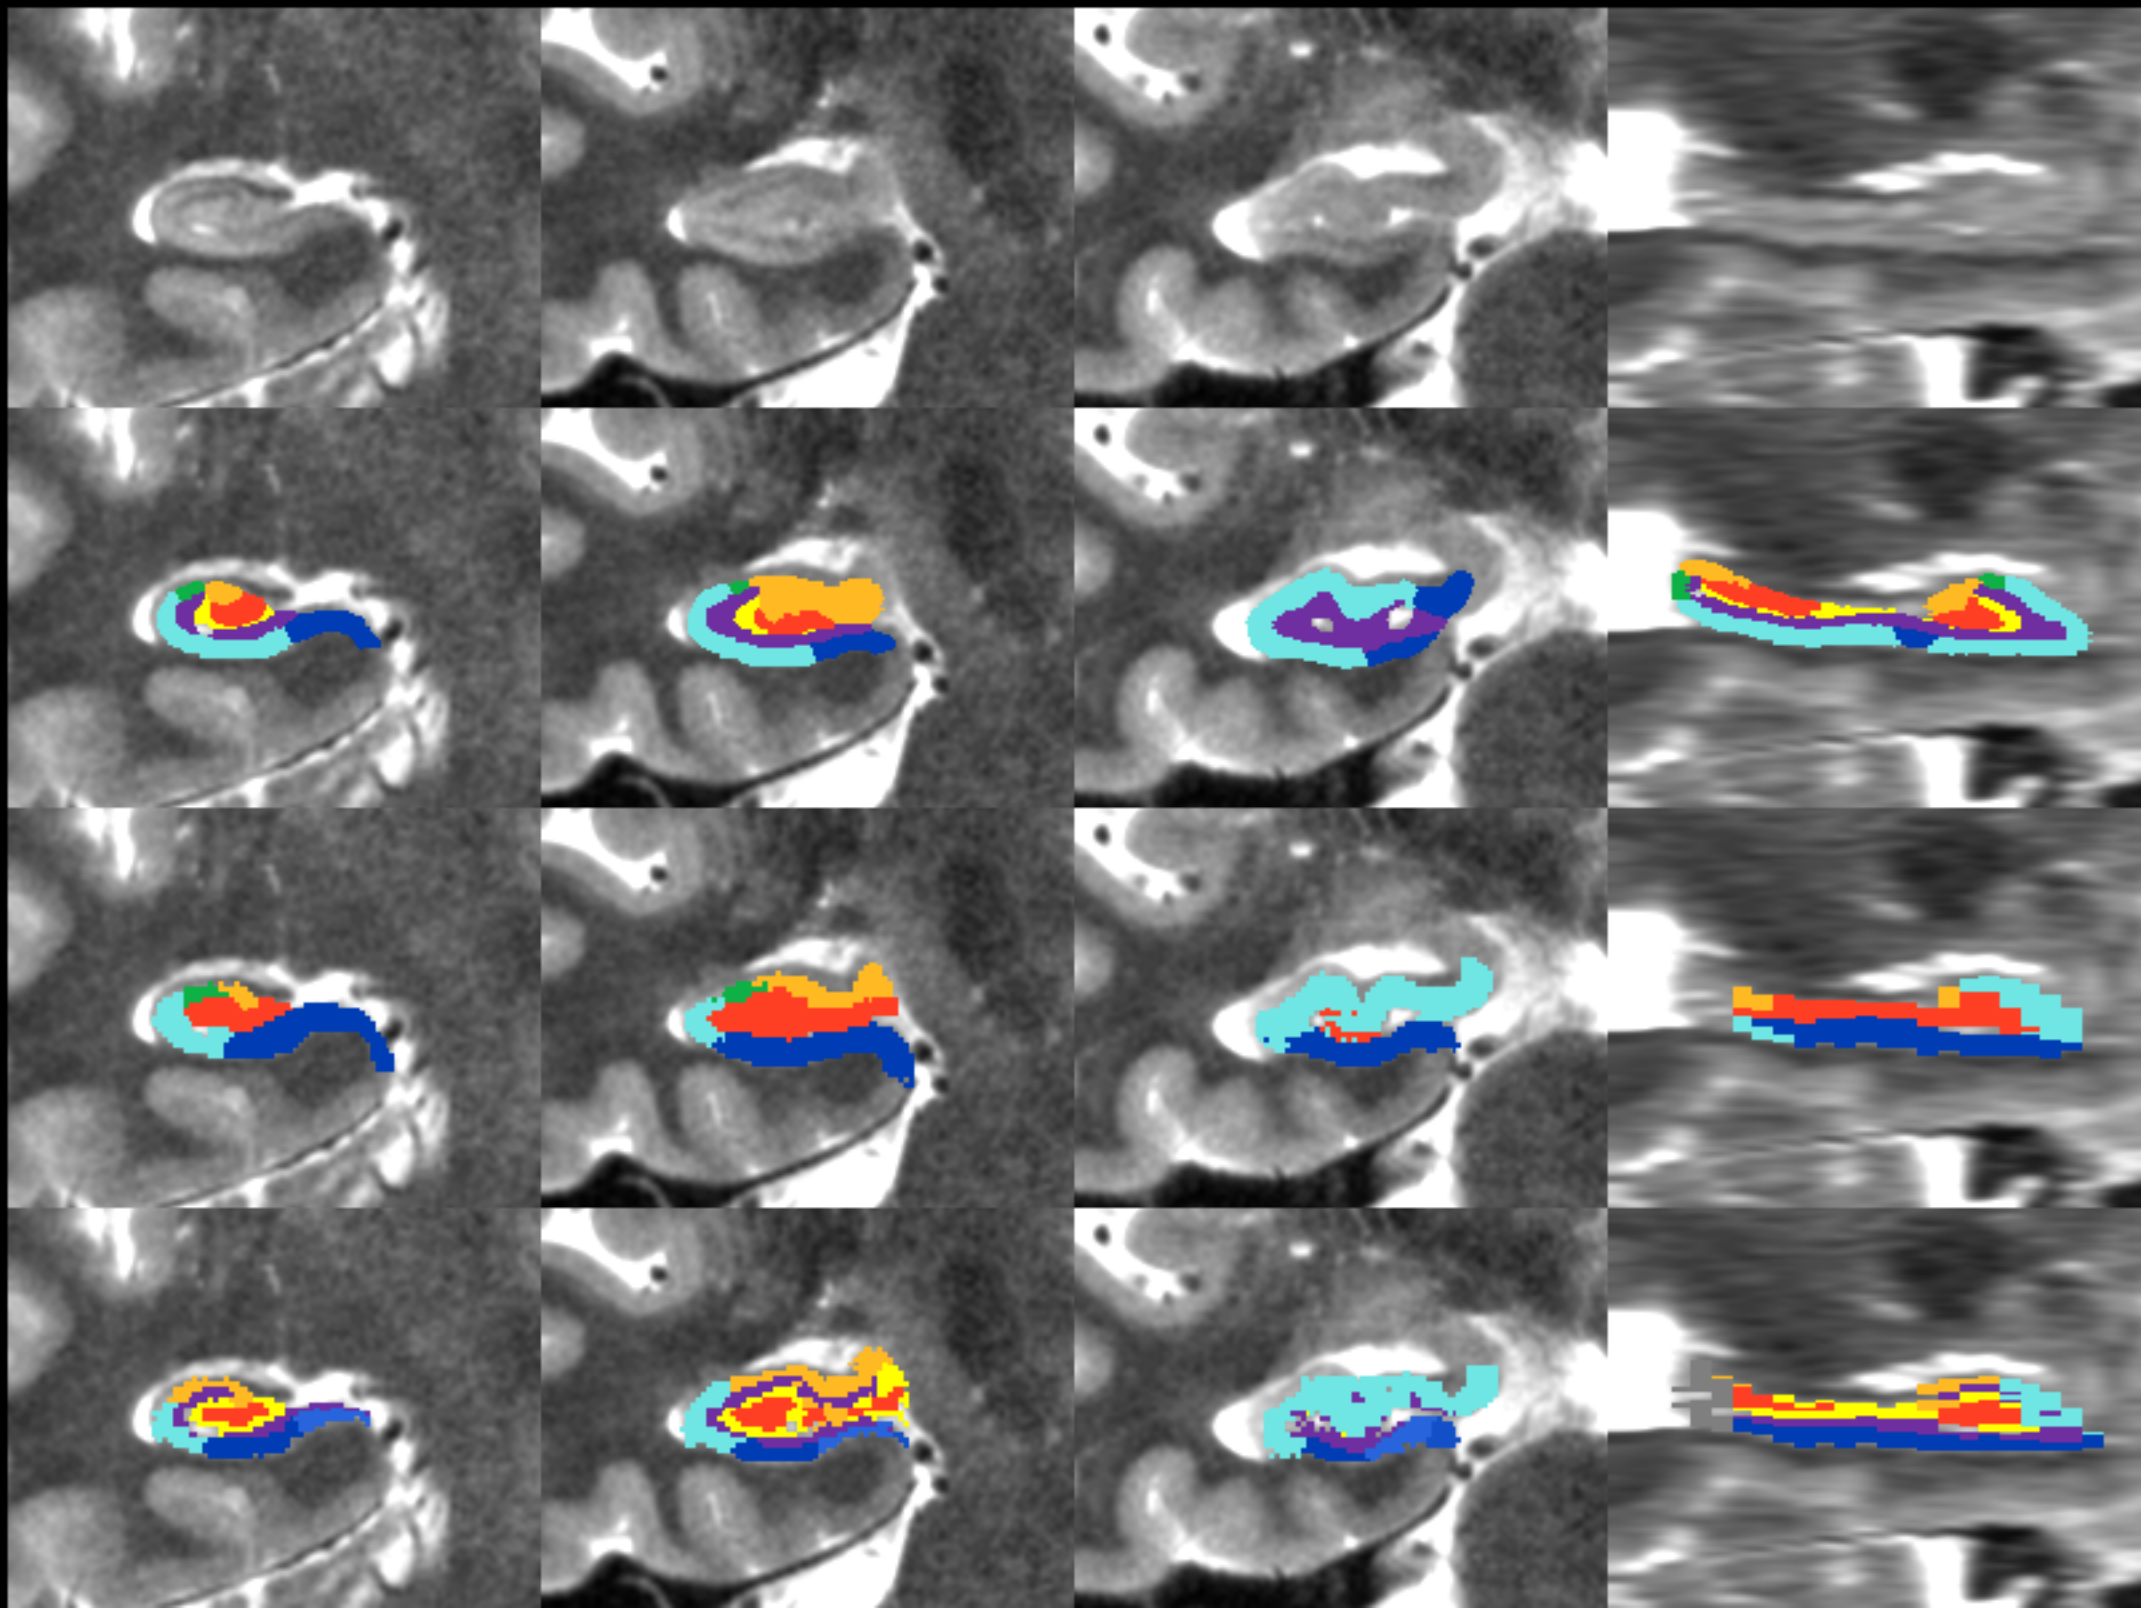

hemi=R,subject=6117051

MRI

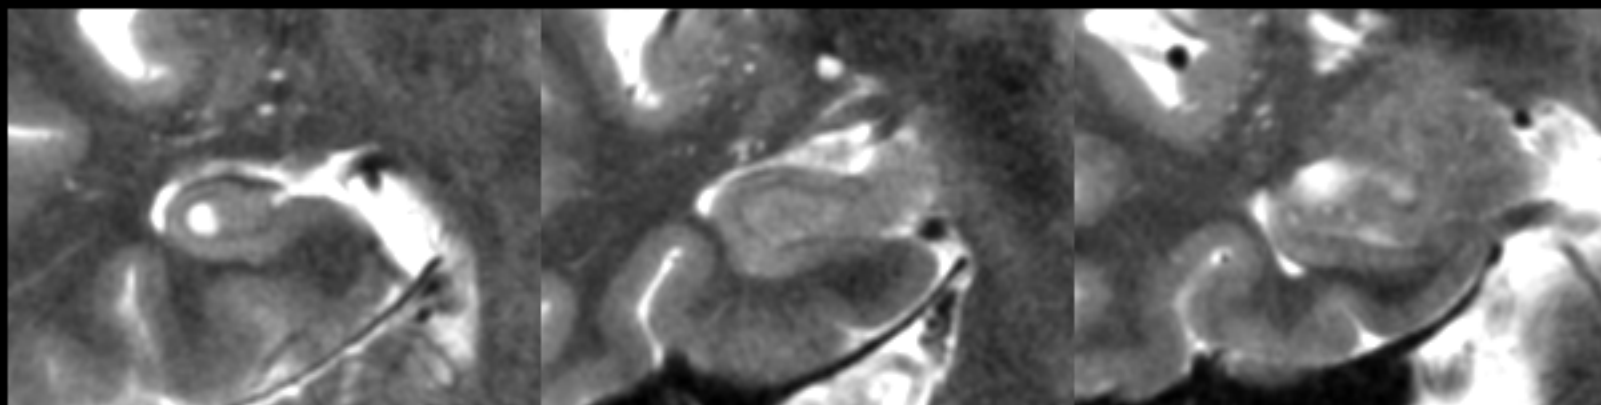

hippunfoldT1

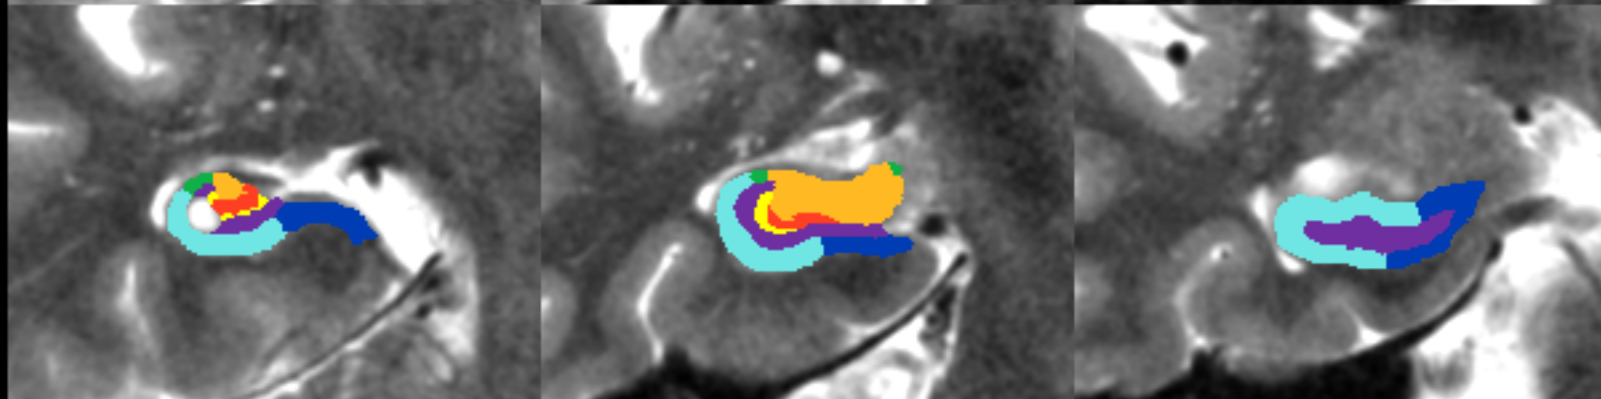

ashs

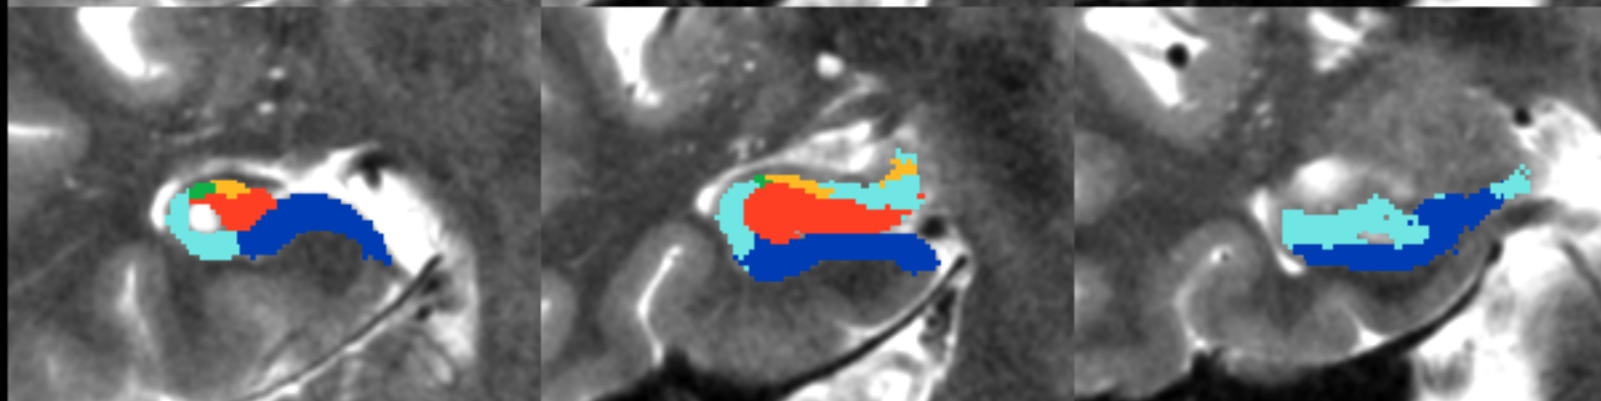

freesurfer

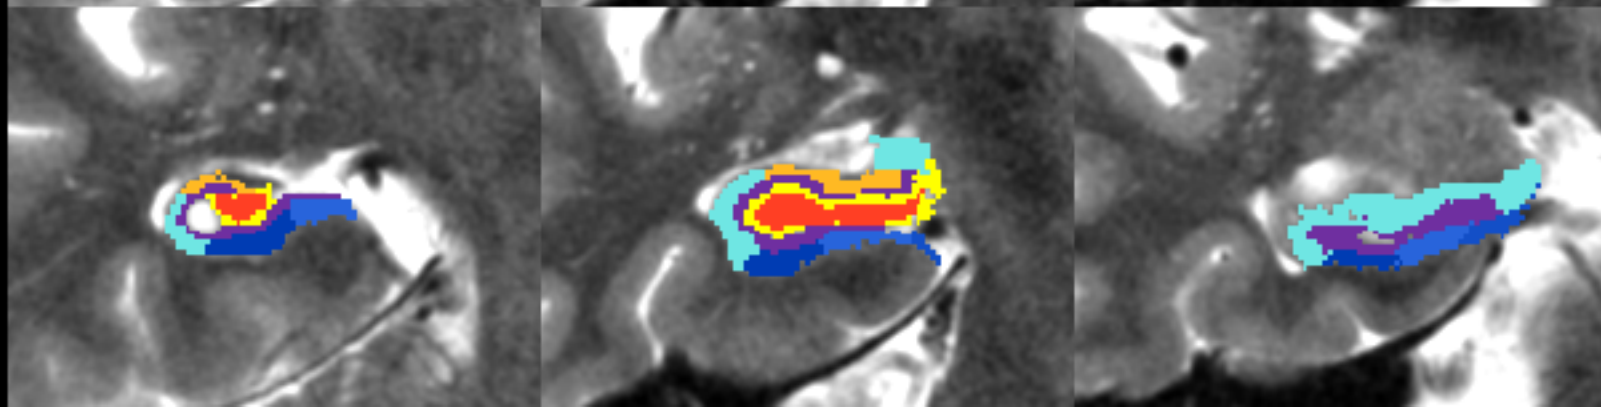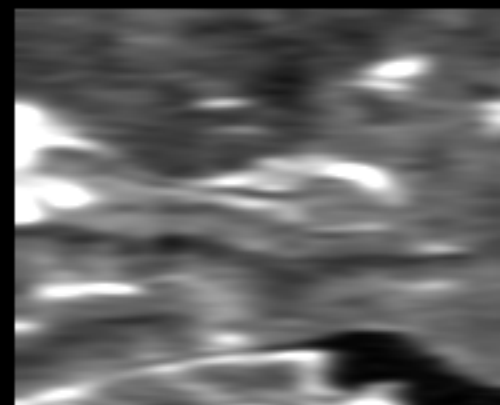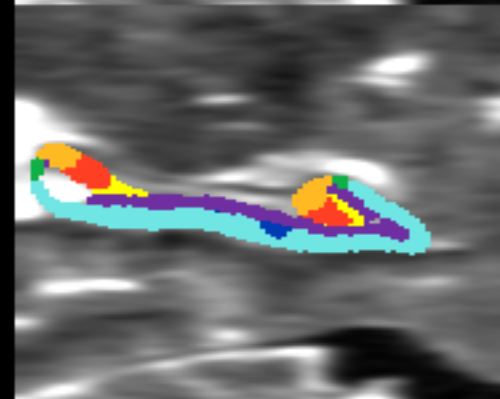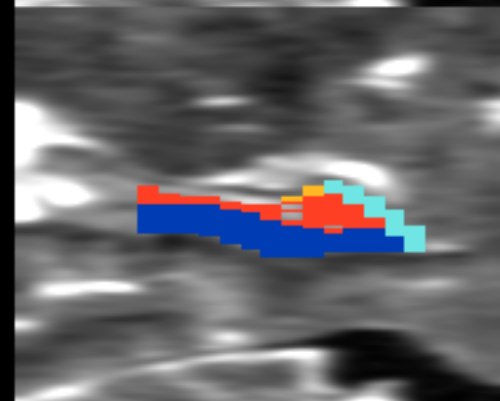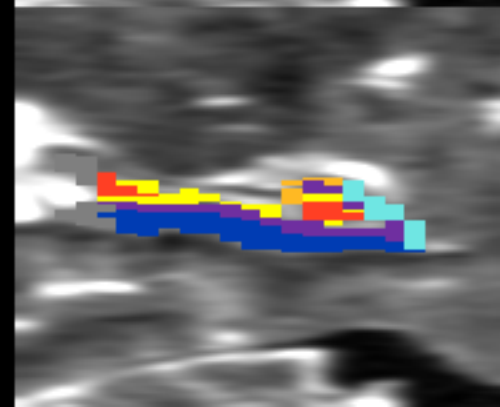

hemi=R,subject=6166973

MRI

hippunfoldT1

ashs

freesurfer

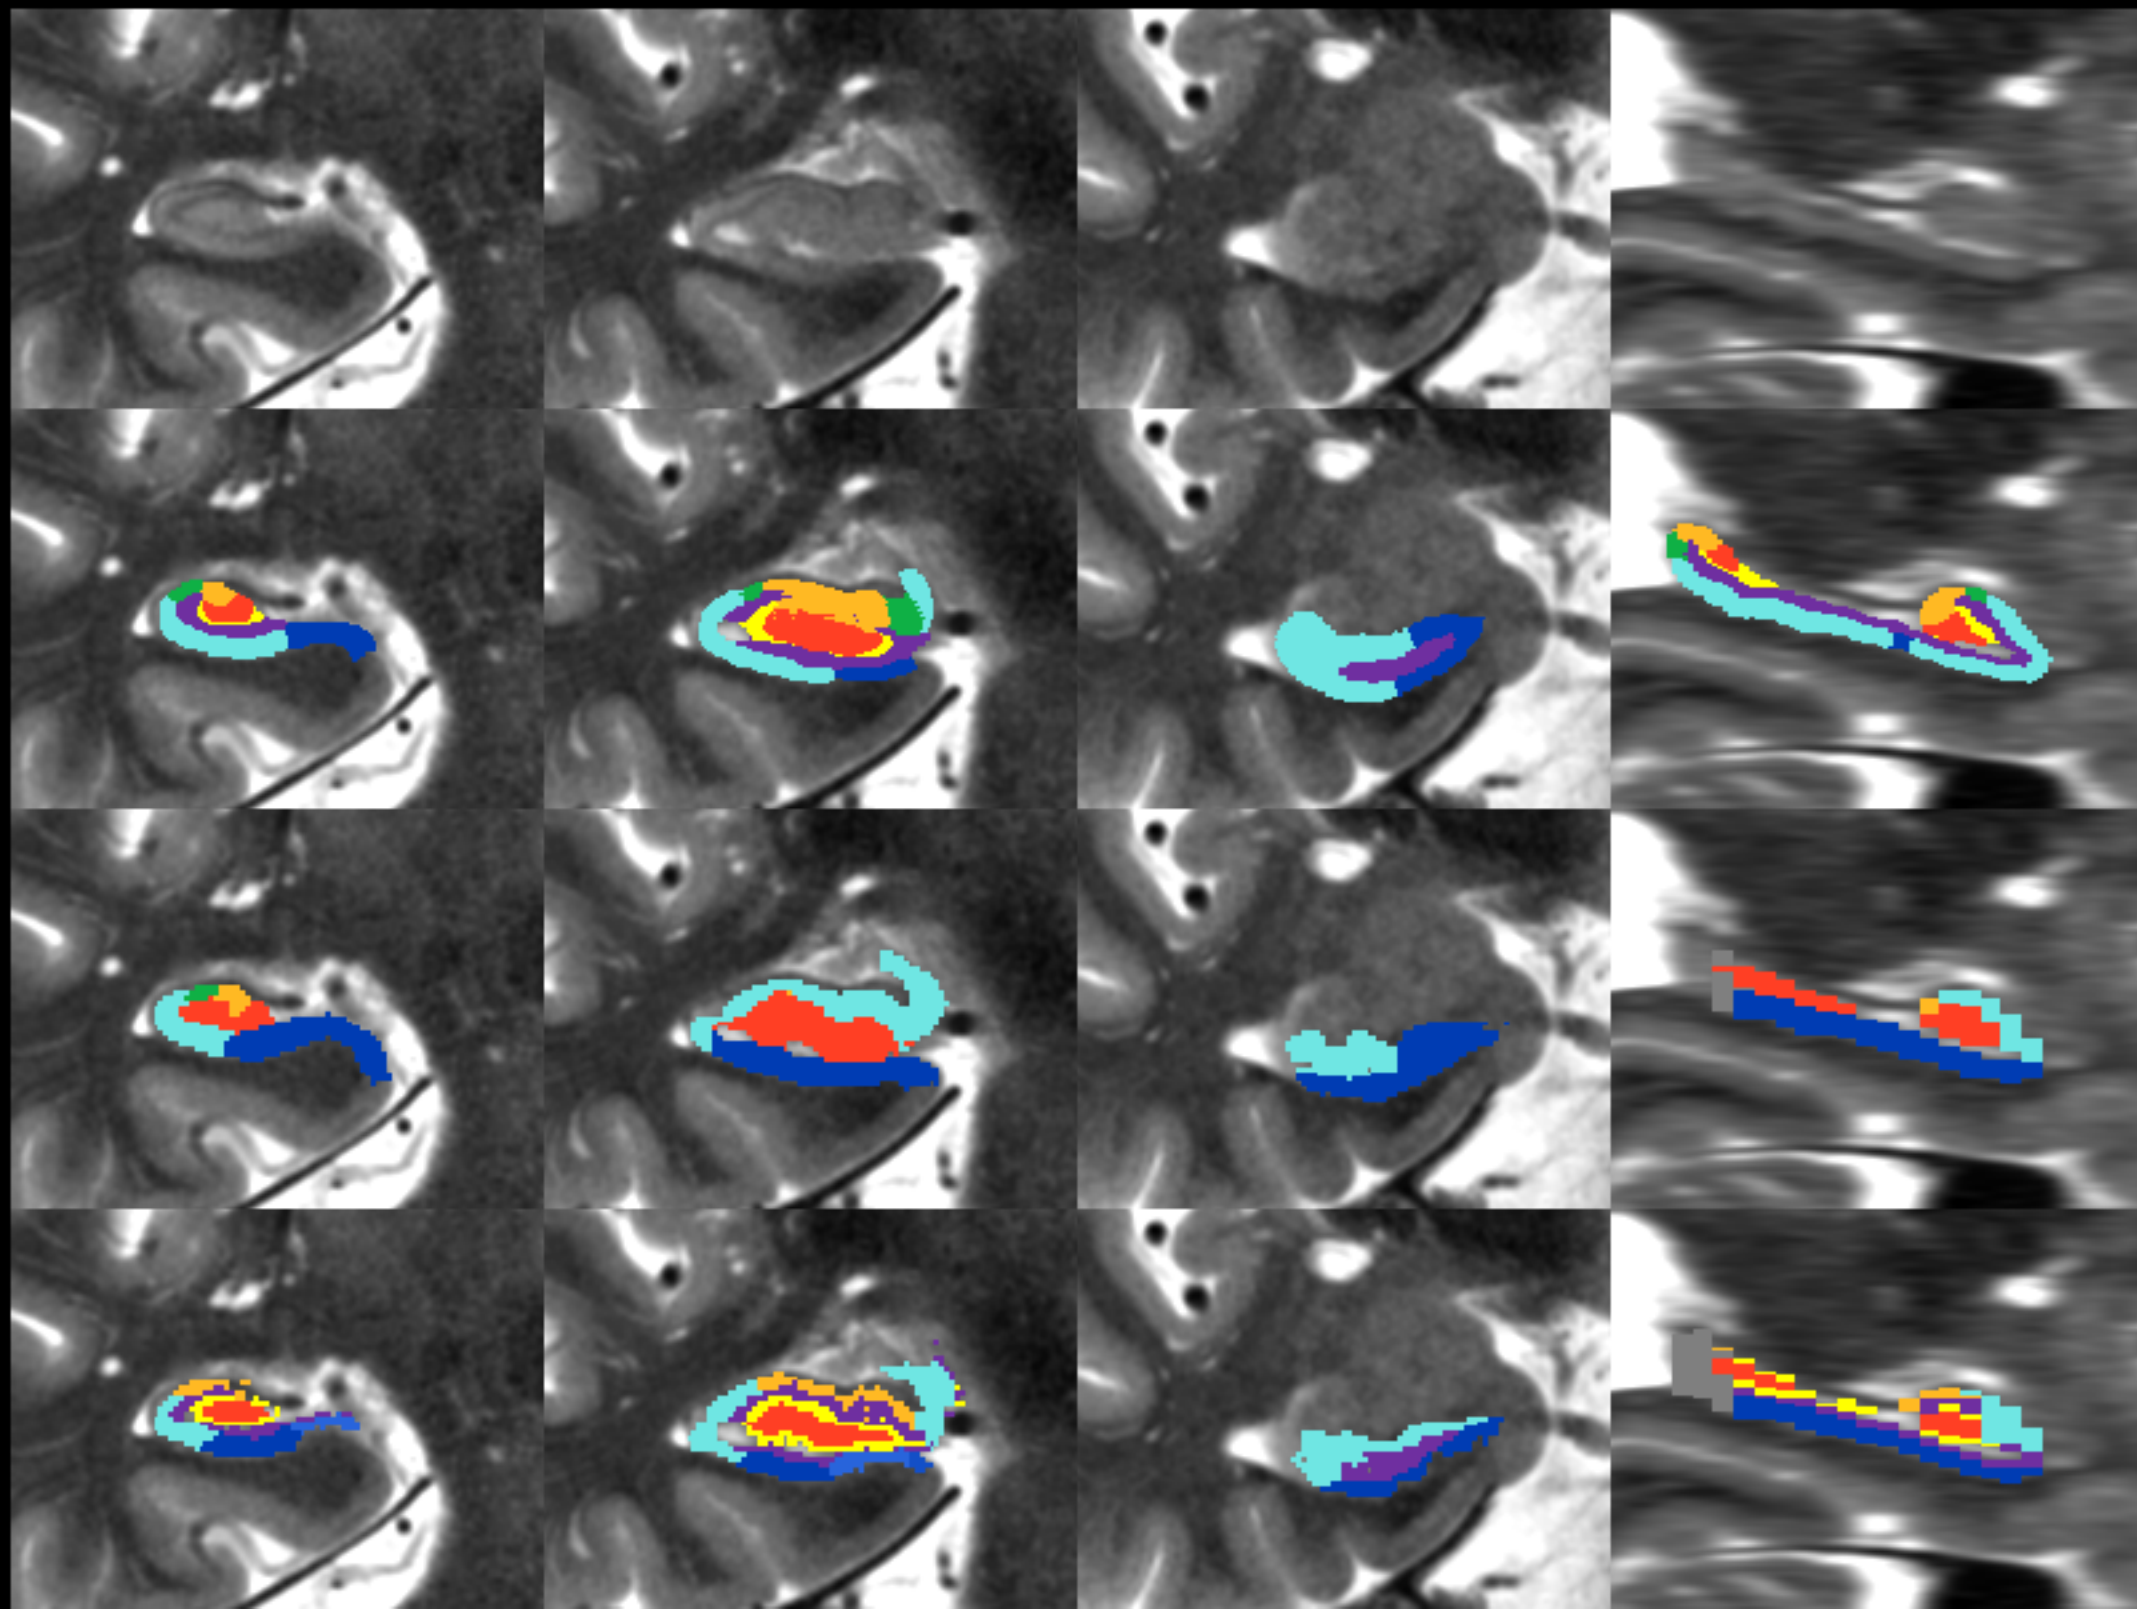

hemi=R,subject=6276475

MRI

hippunfoldT1

ashs

freesurfer

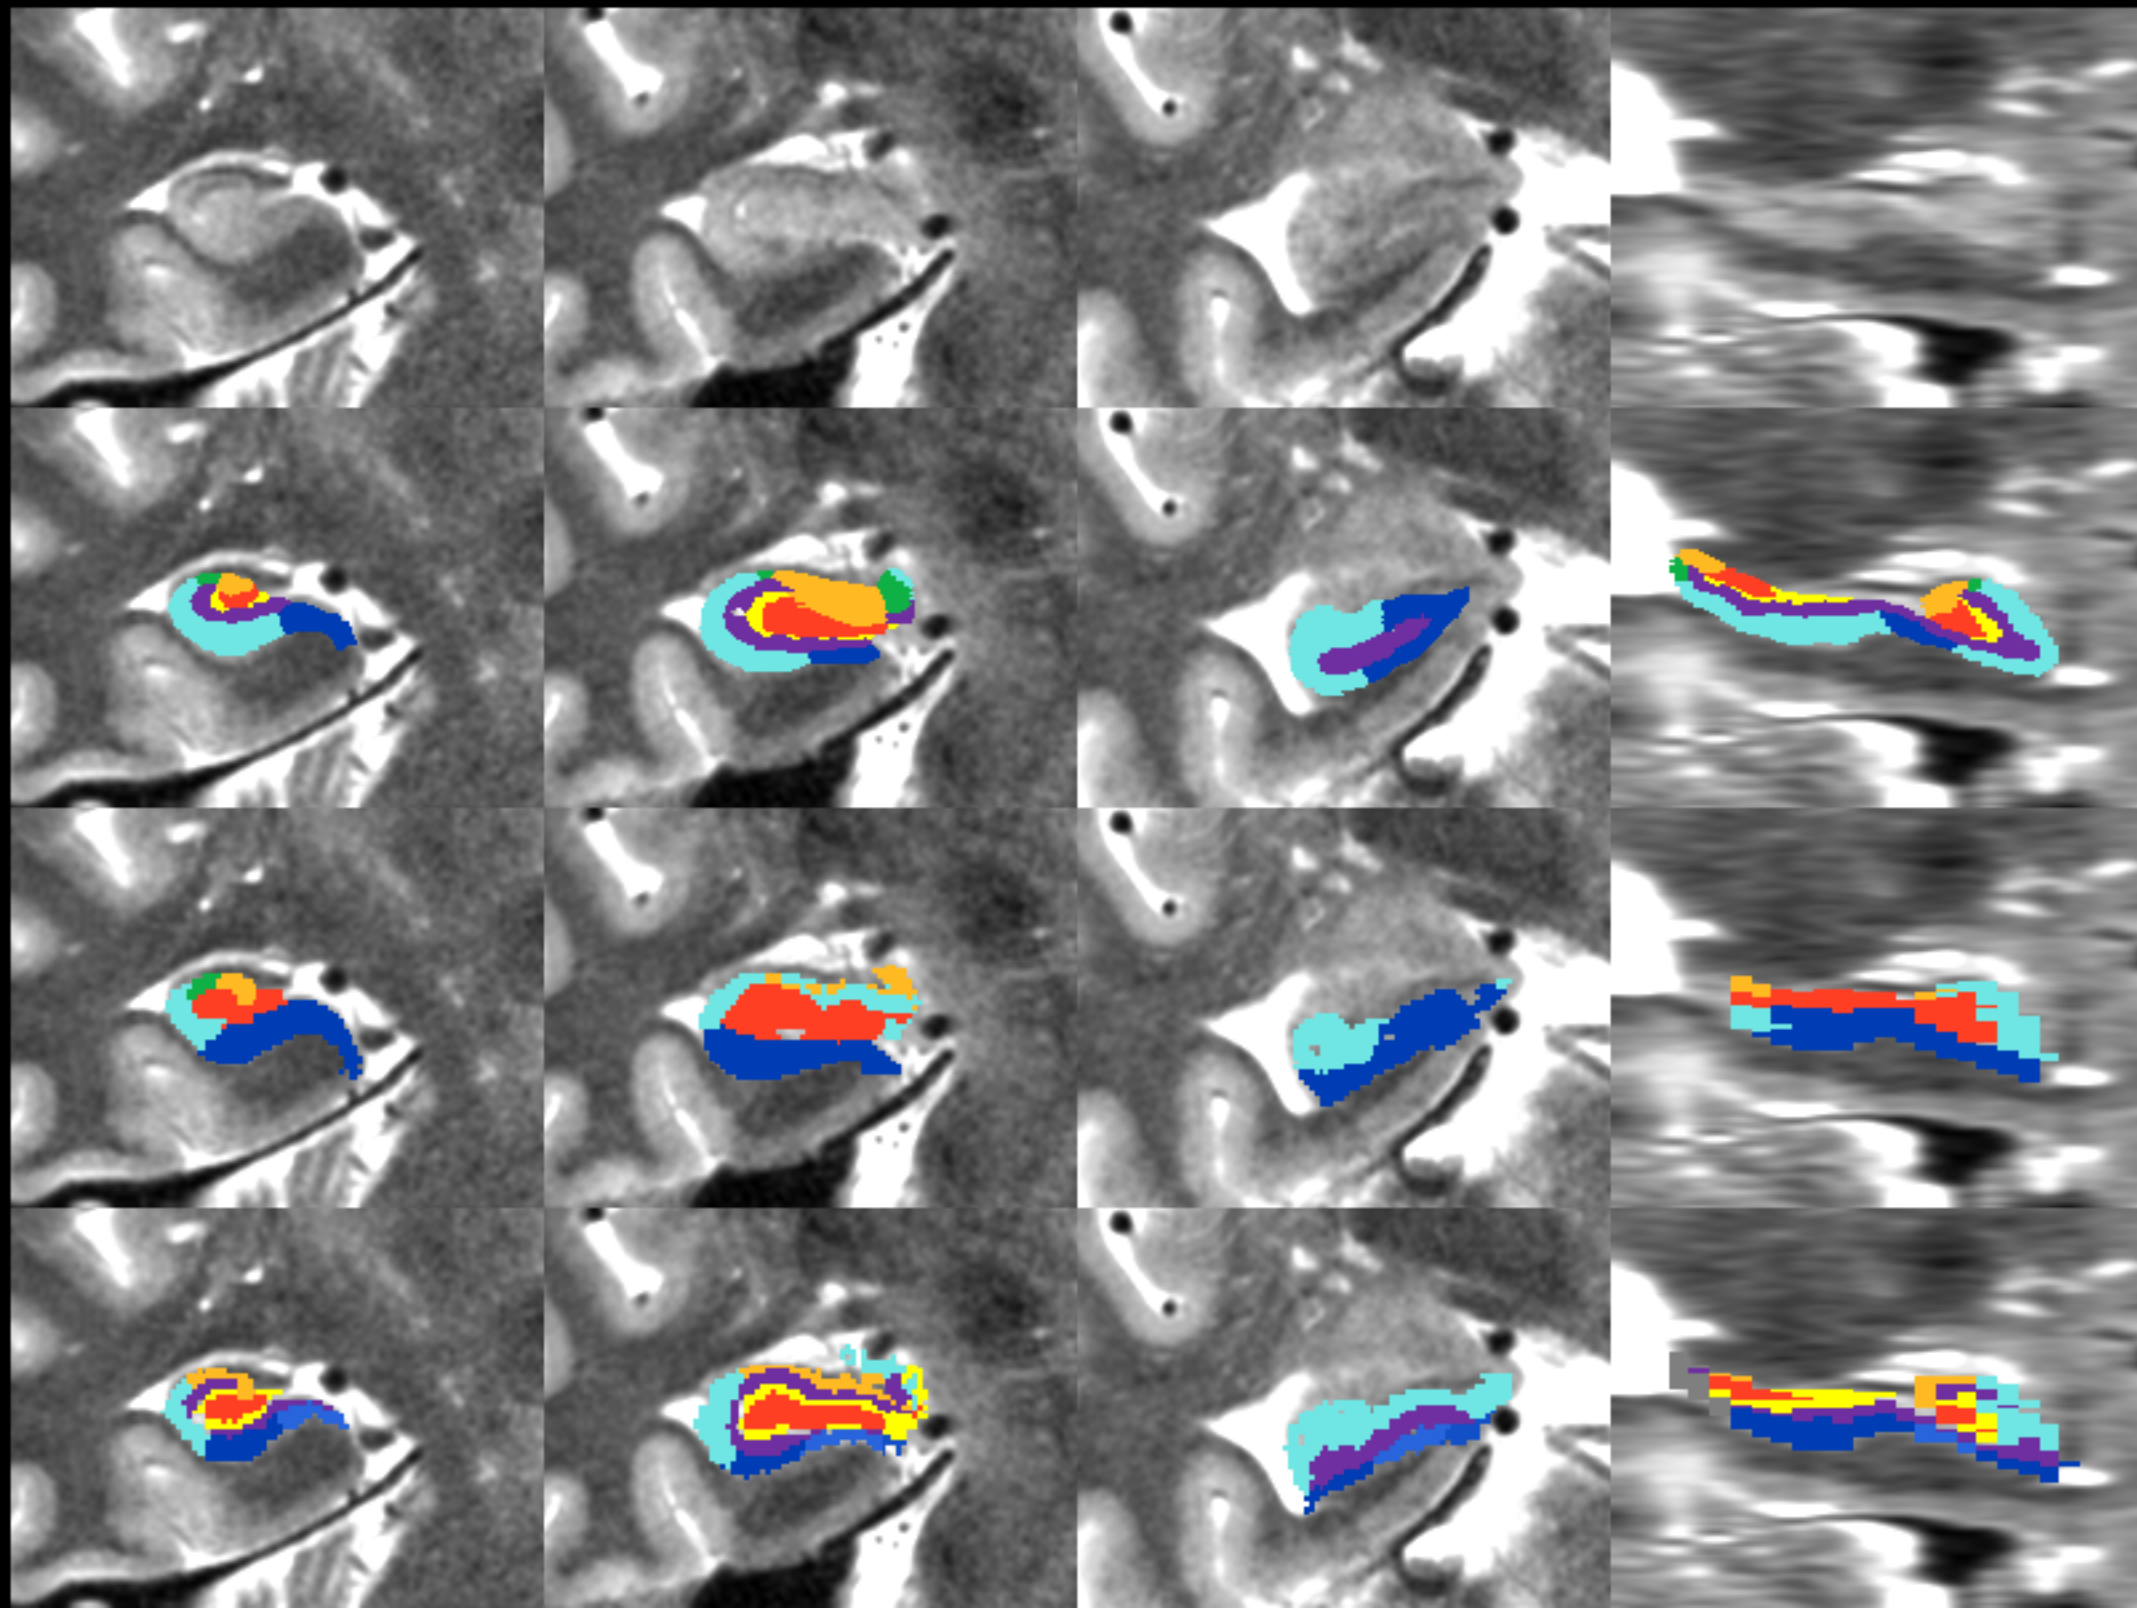

hemi=R,subject=6291976

MRI

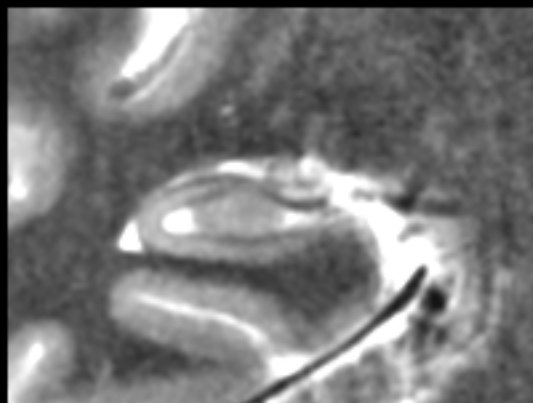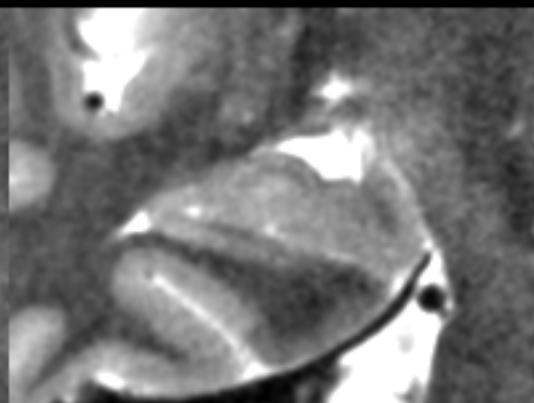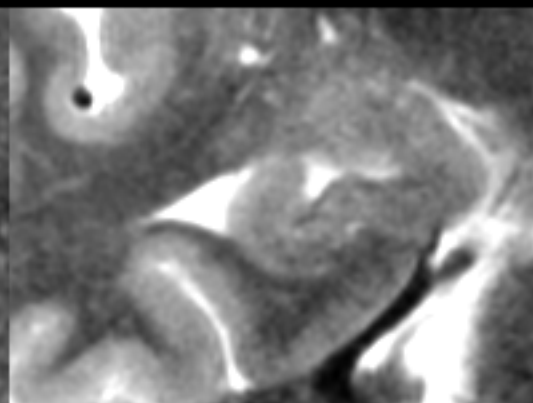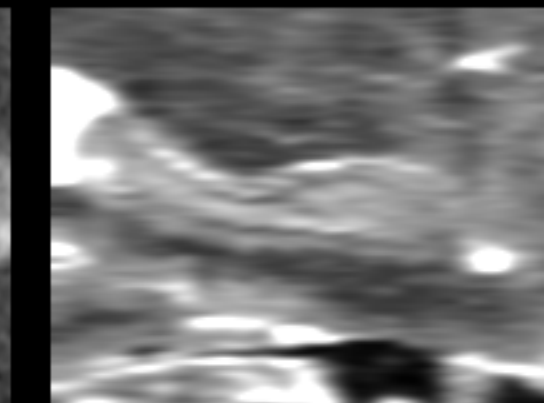

hippunfoldT1

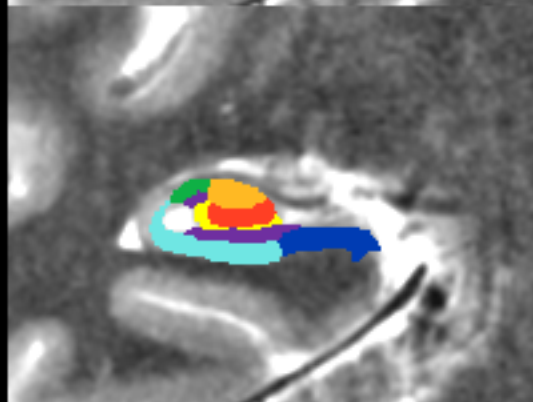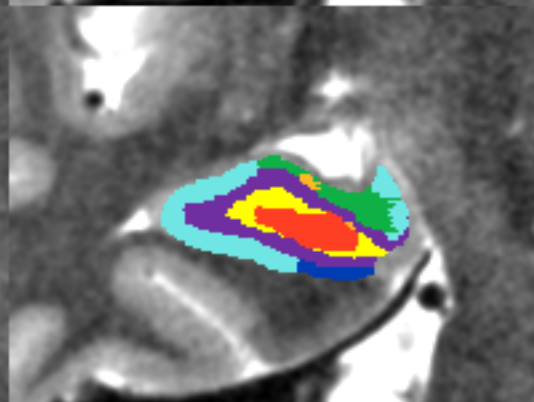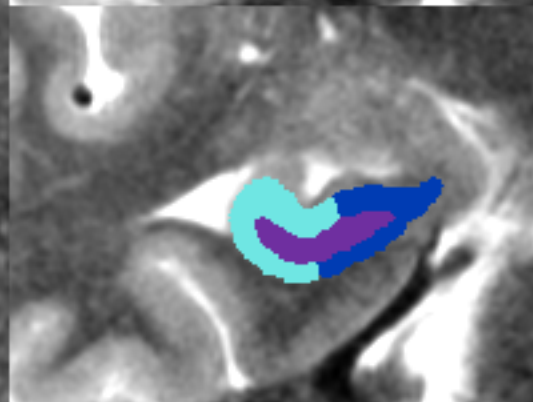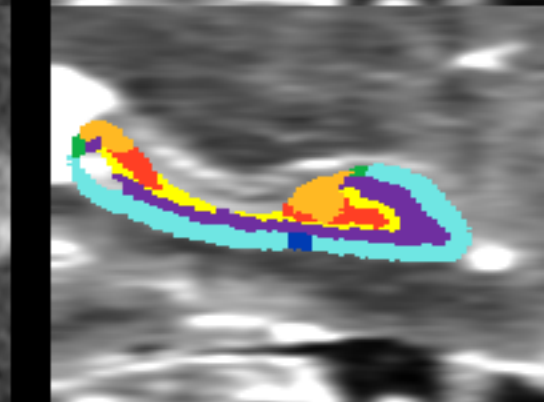

ashs

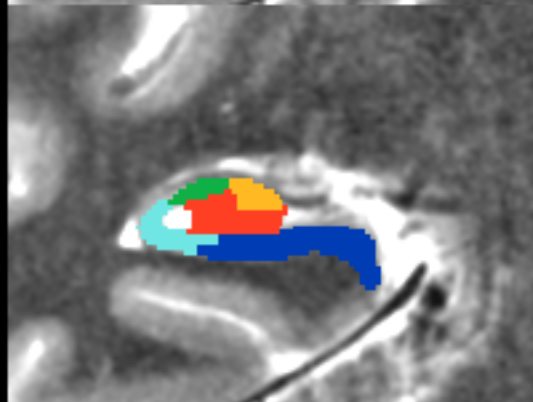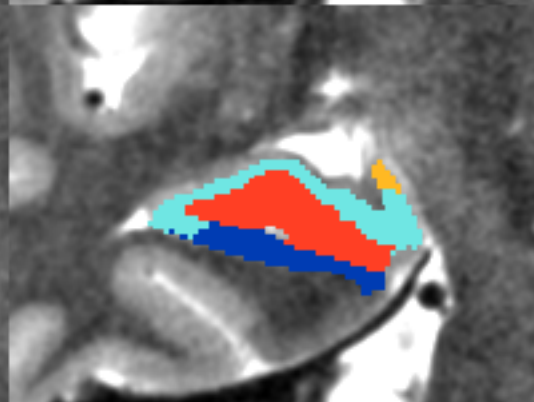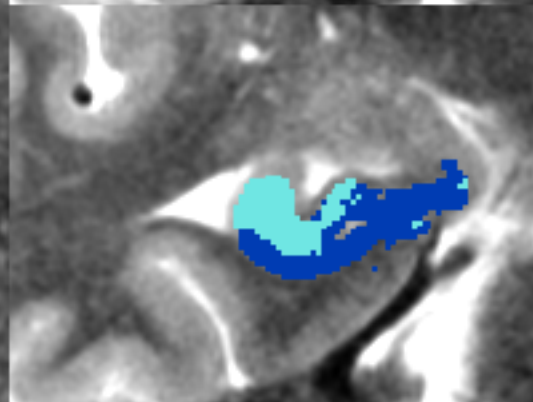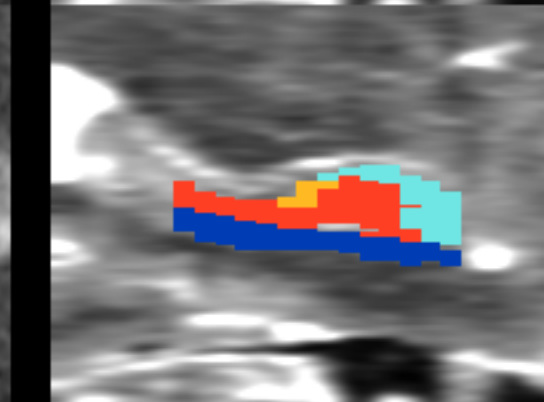

freesurfer

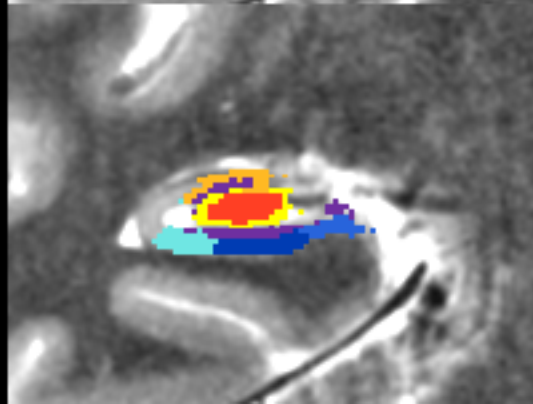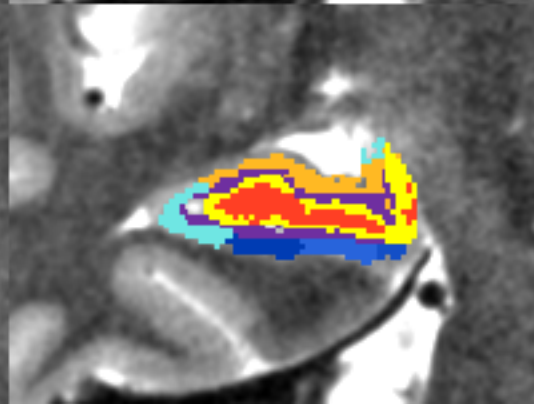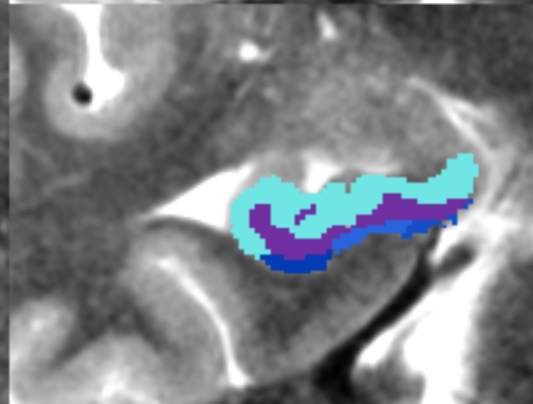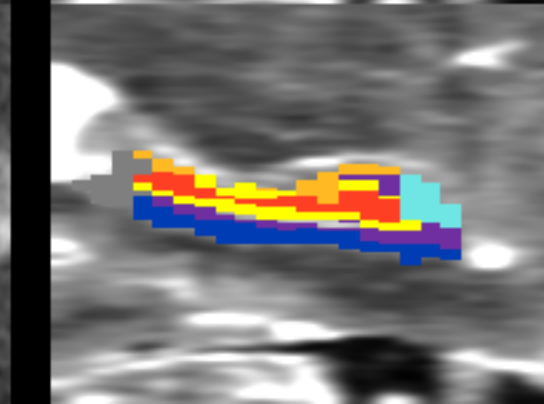

hemi=R,subject=6317665

MRI

hippunfoldT1

ashes

freesurfer

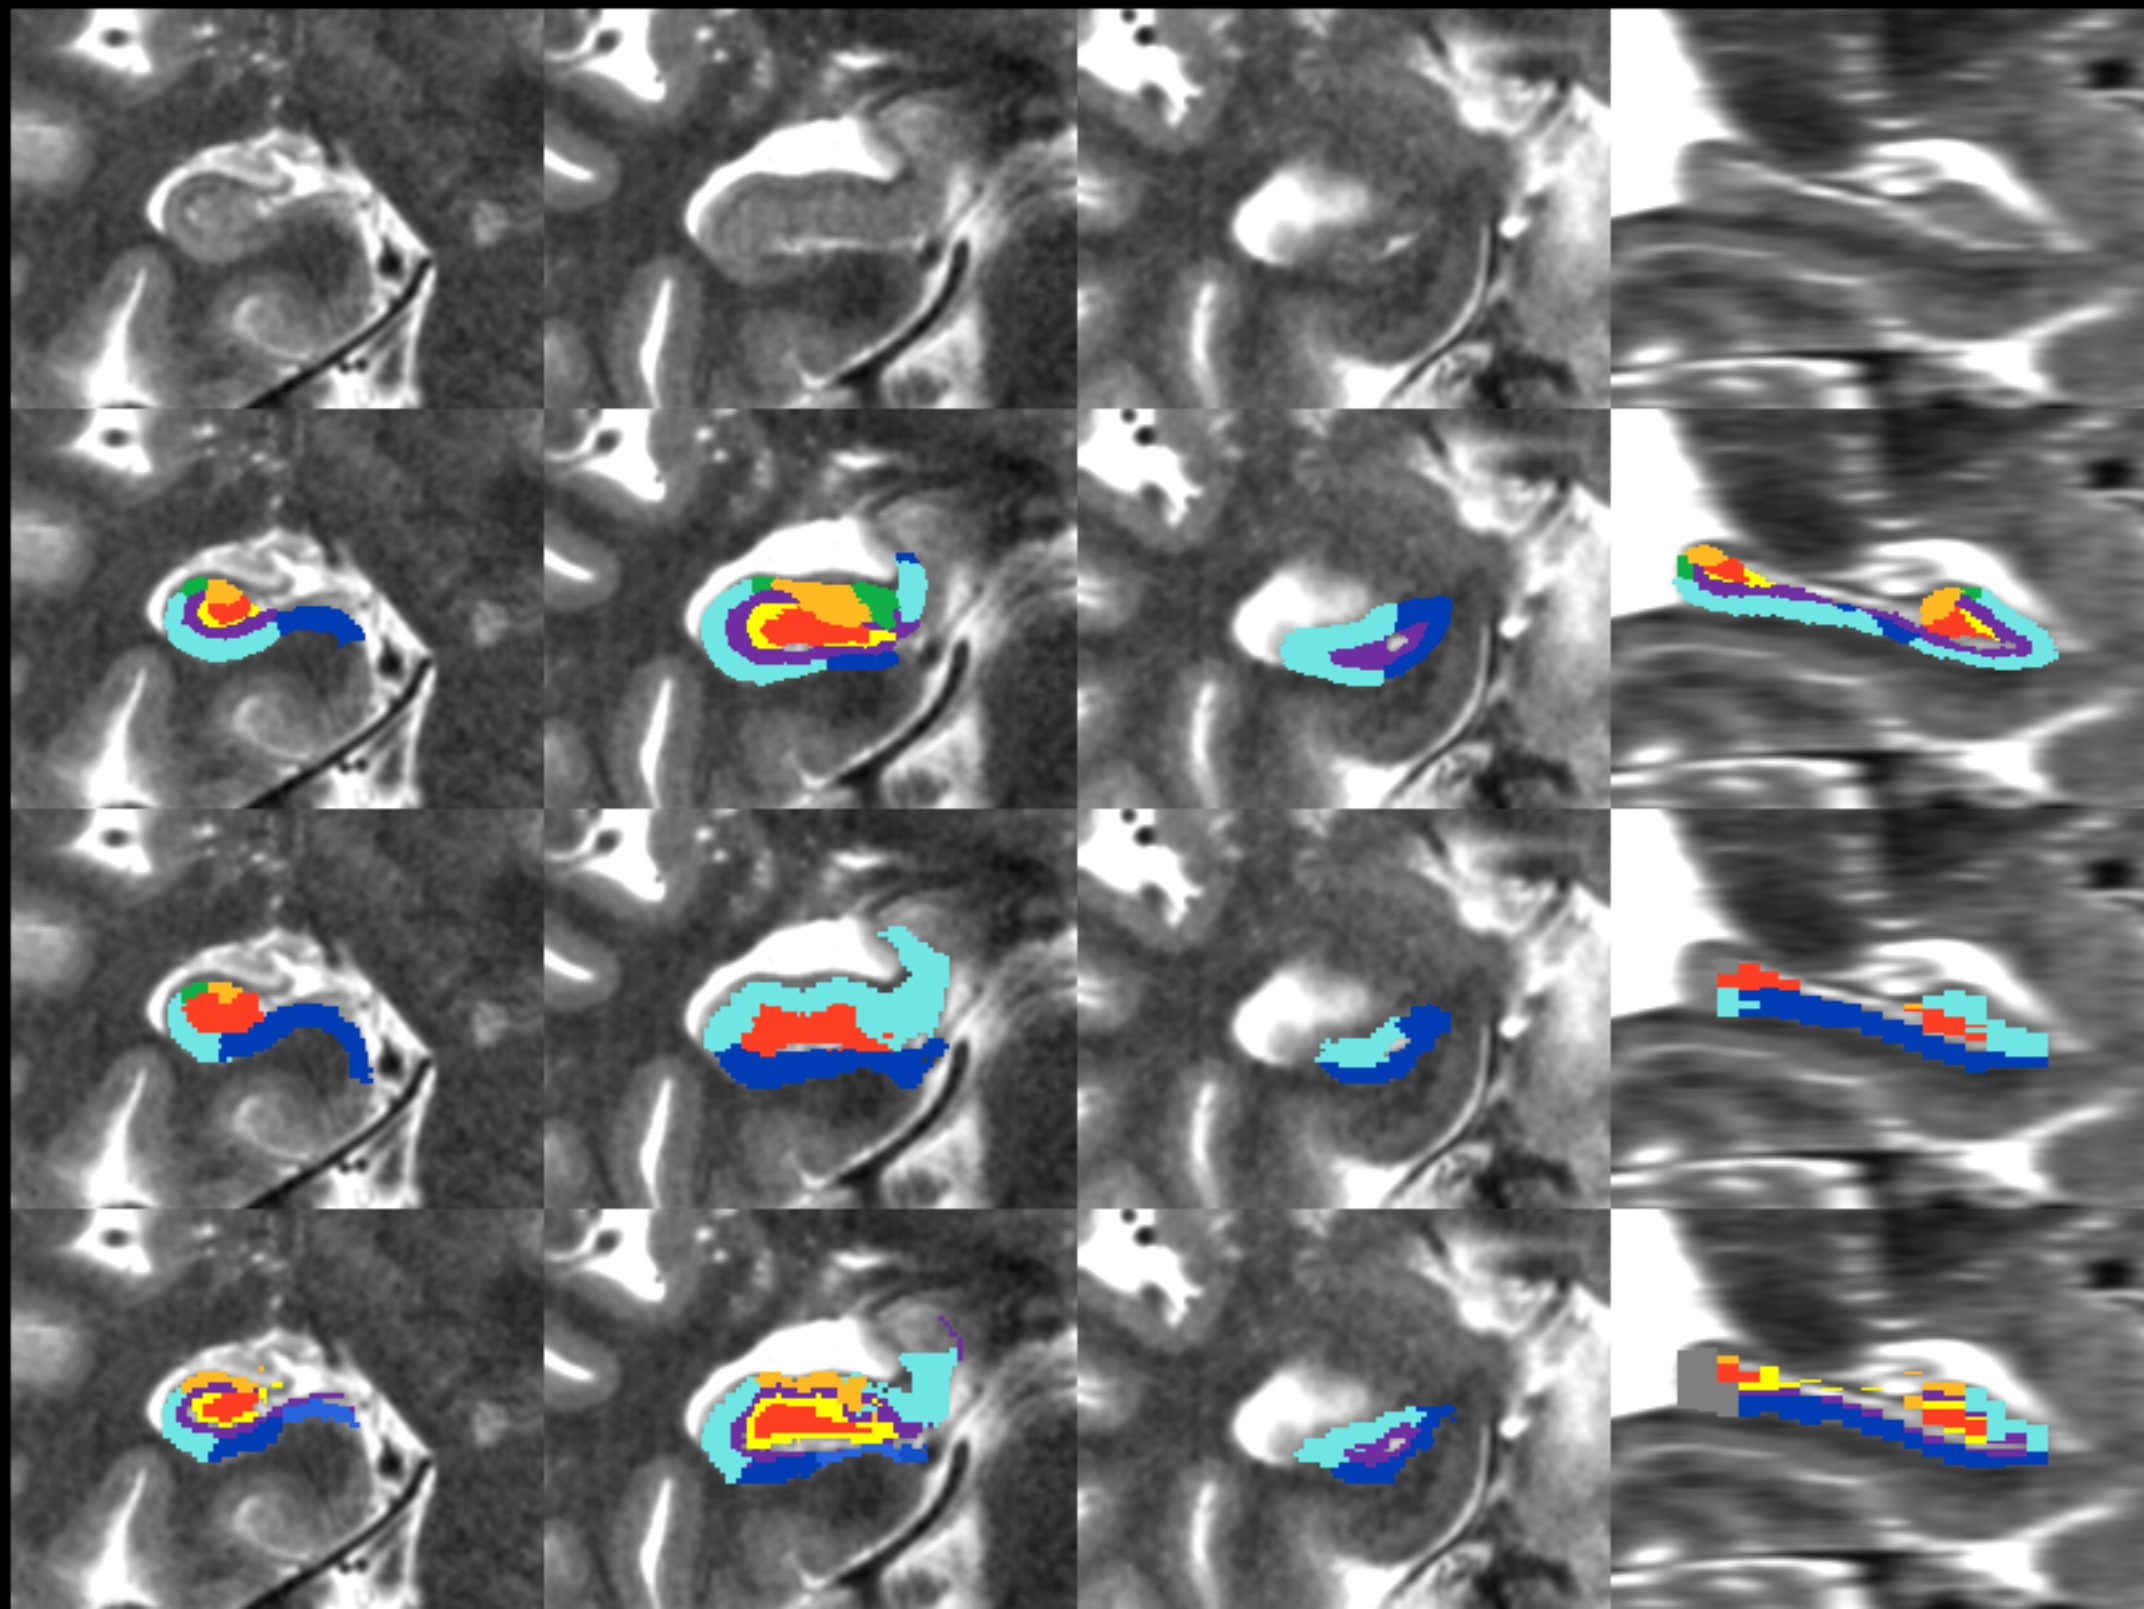

hemi=R,subject=6363167

MRI

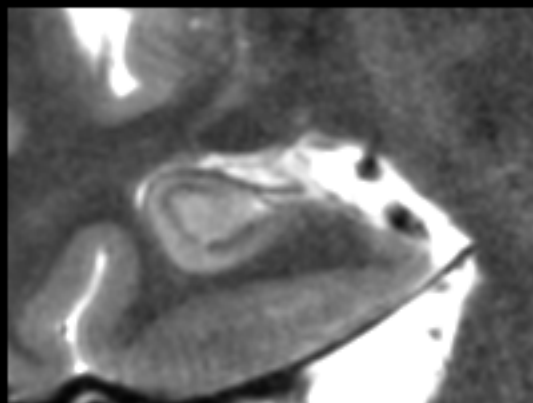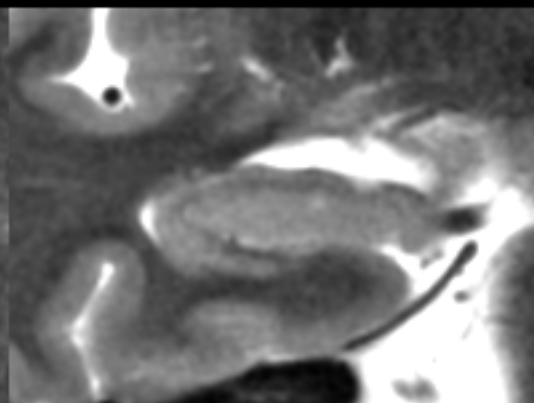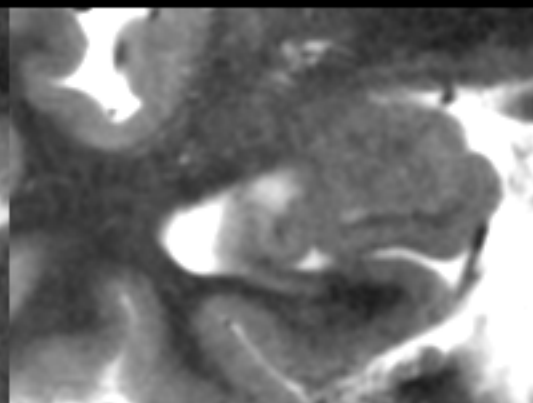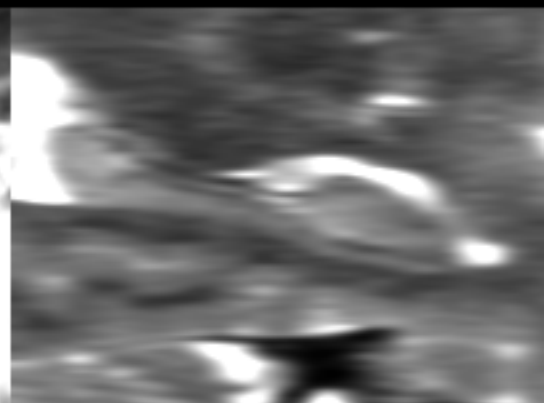

hippunfoldT1

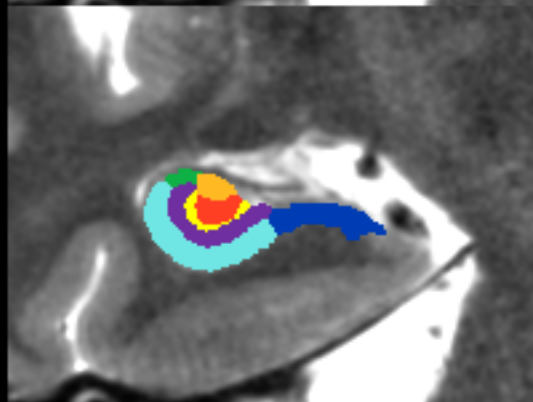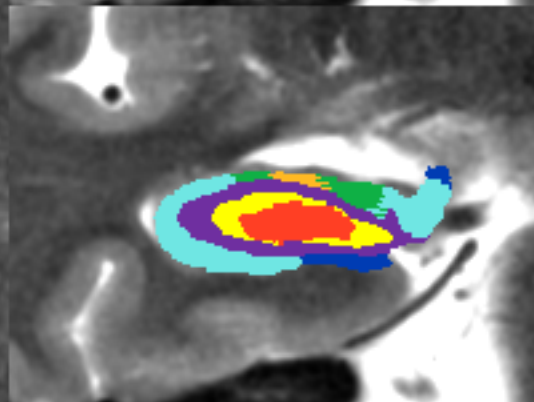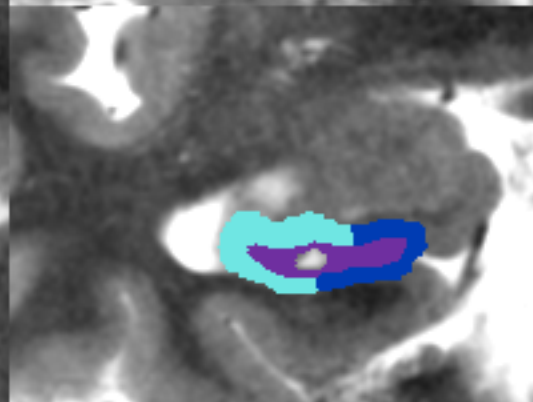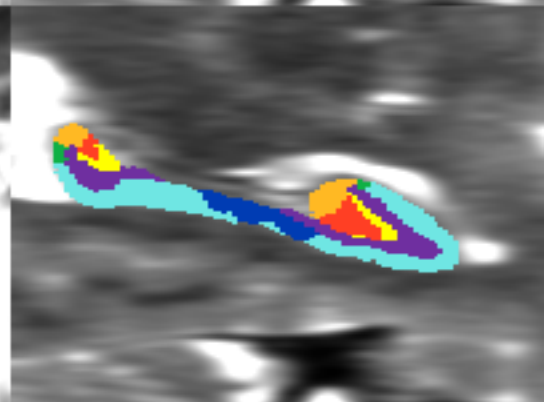

ashs

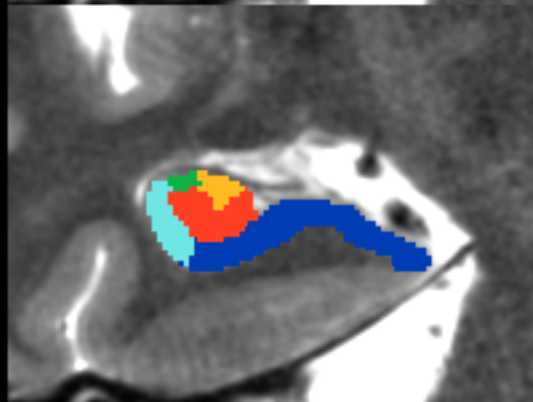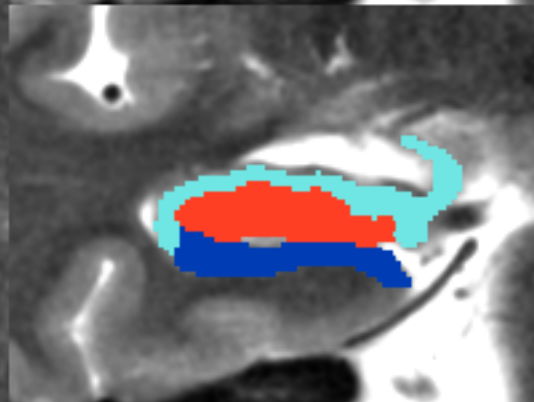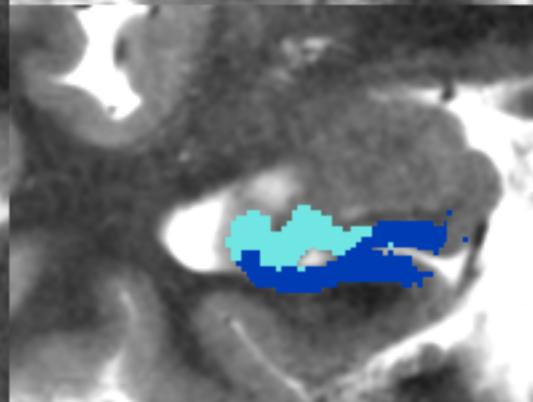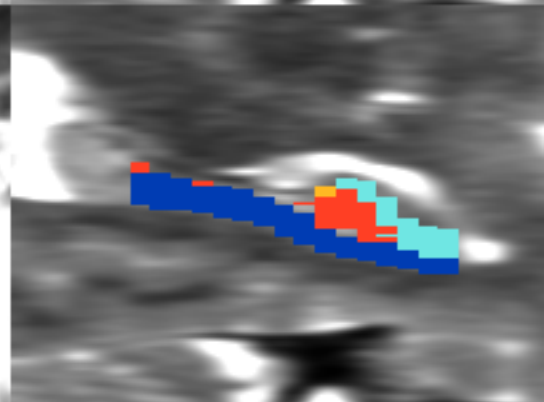

freesurfer

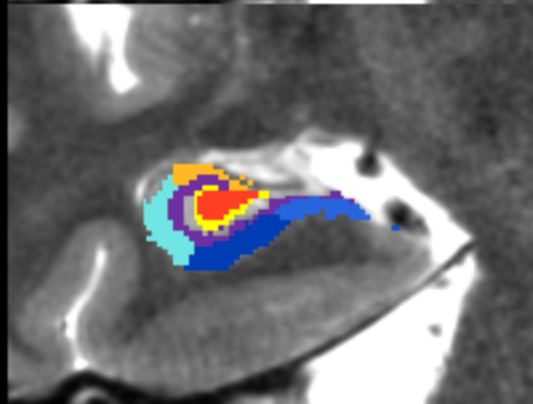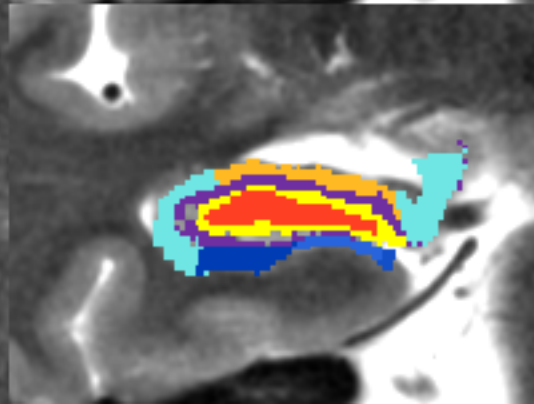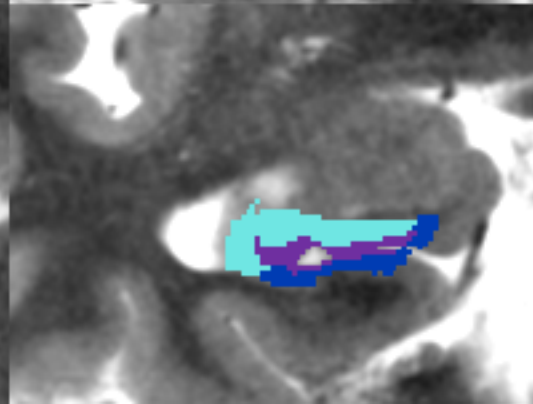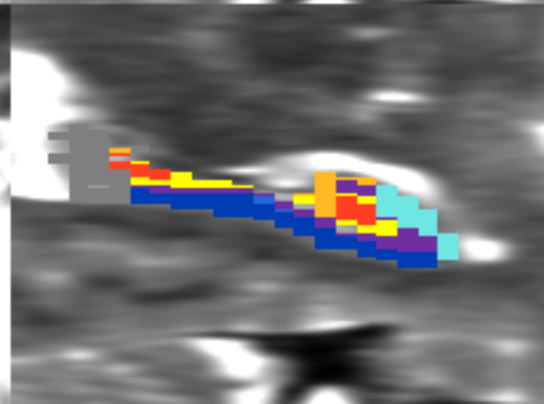

hemi=R,subject=6405157

MRI

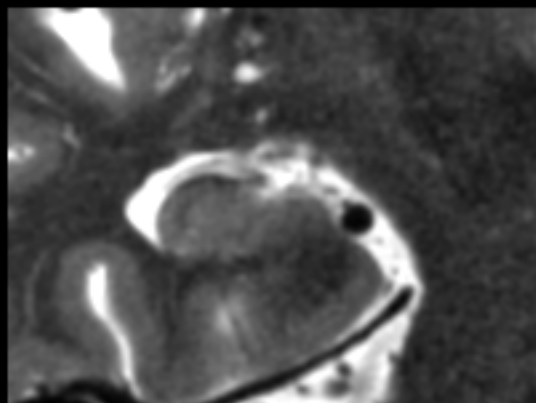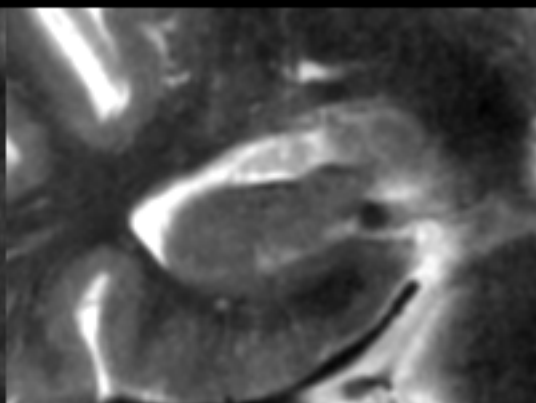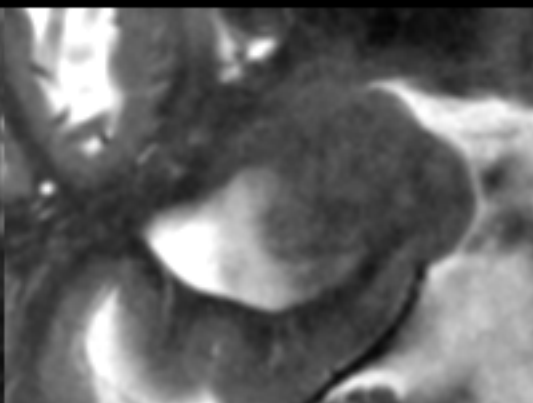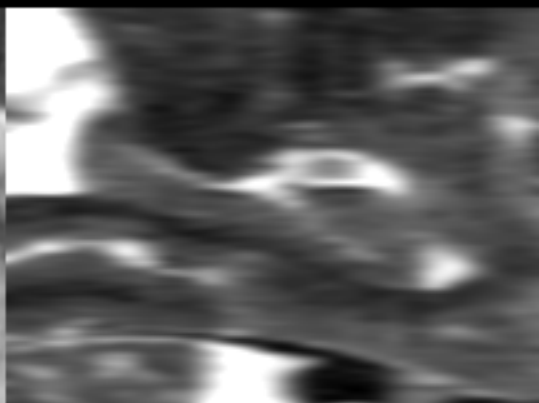

hippunfoldT1

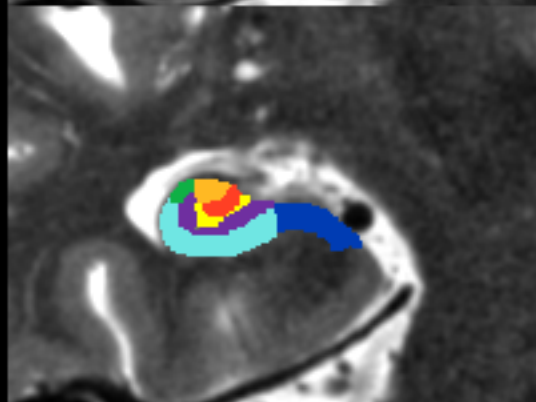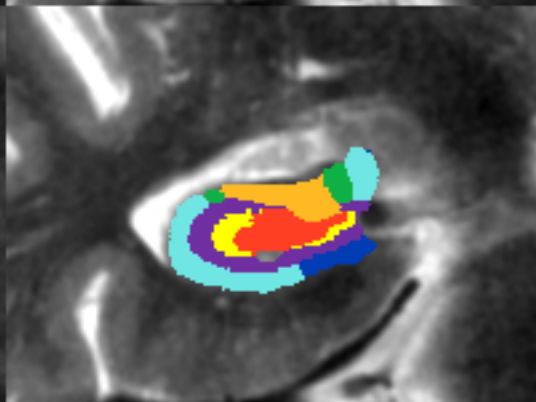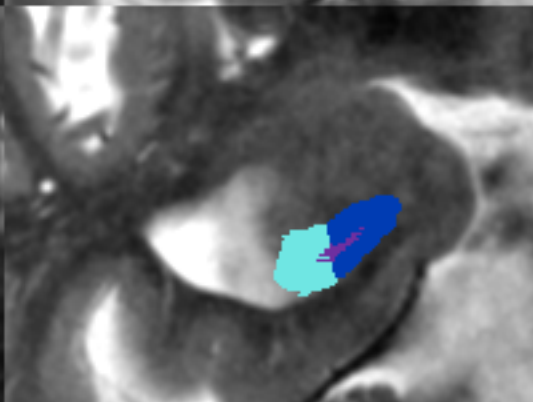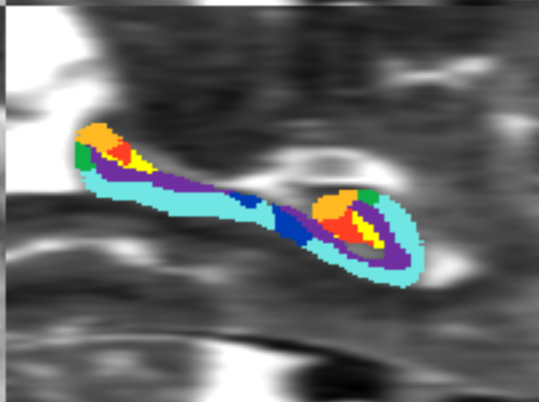

ashs

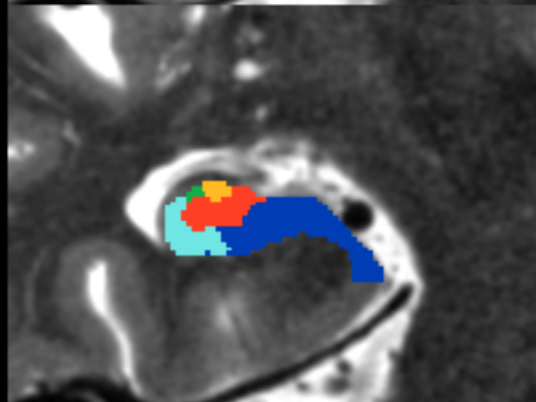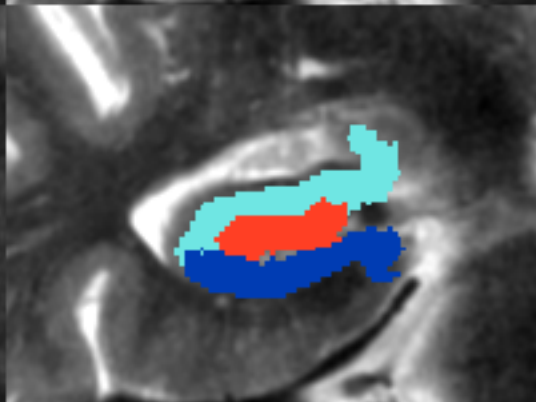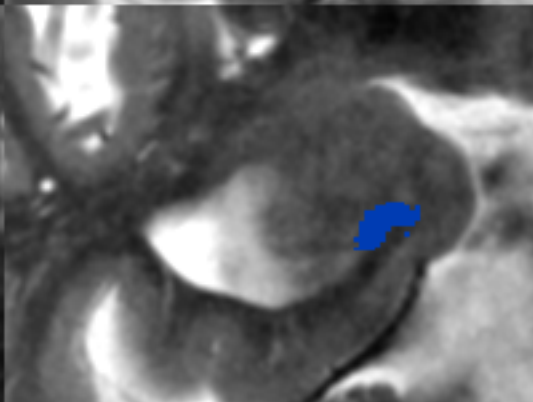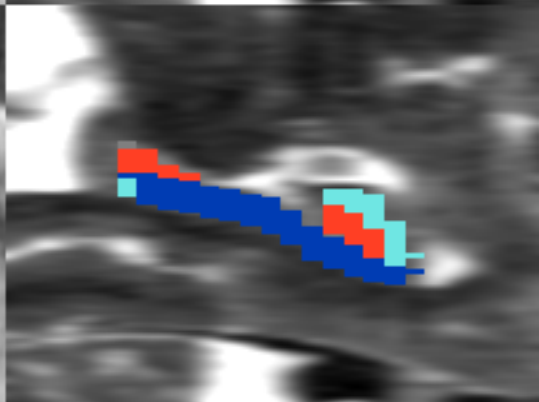

freesurfer

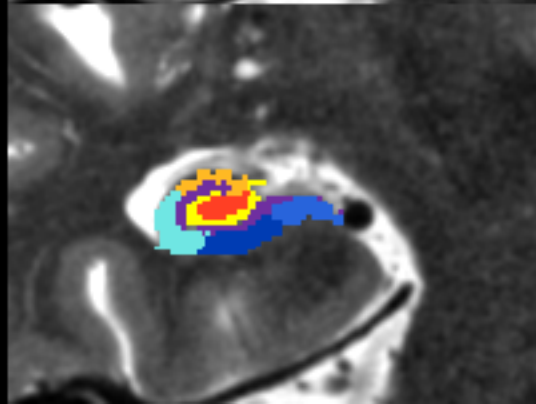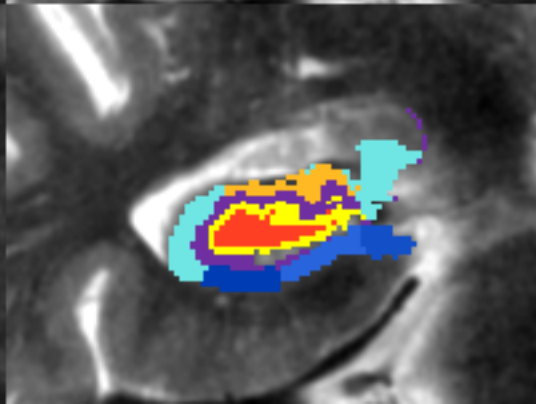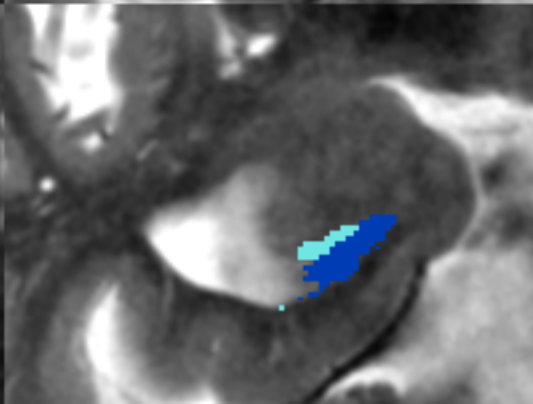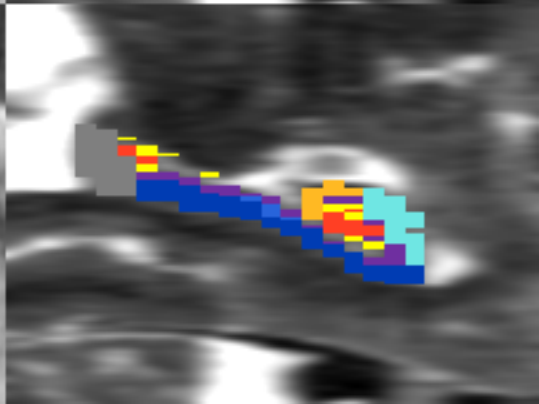



hemi=R,subject=6451366

MRI

hippunfoldT1

ashs

freesurfer

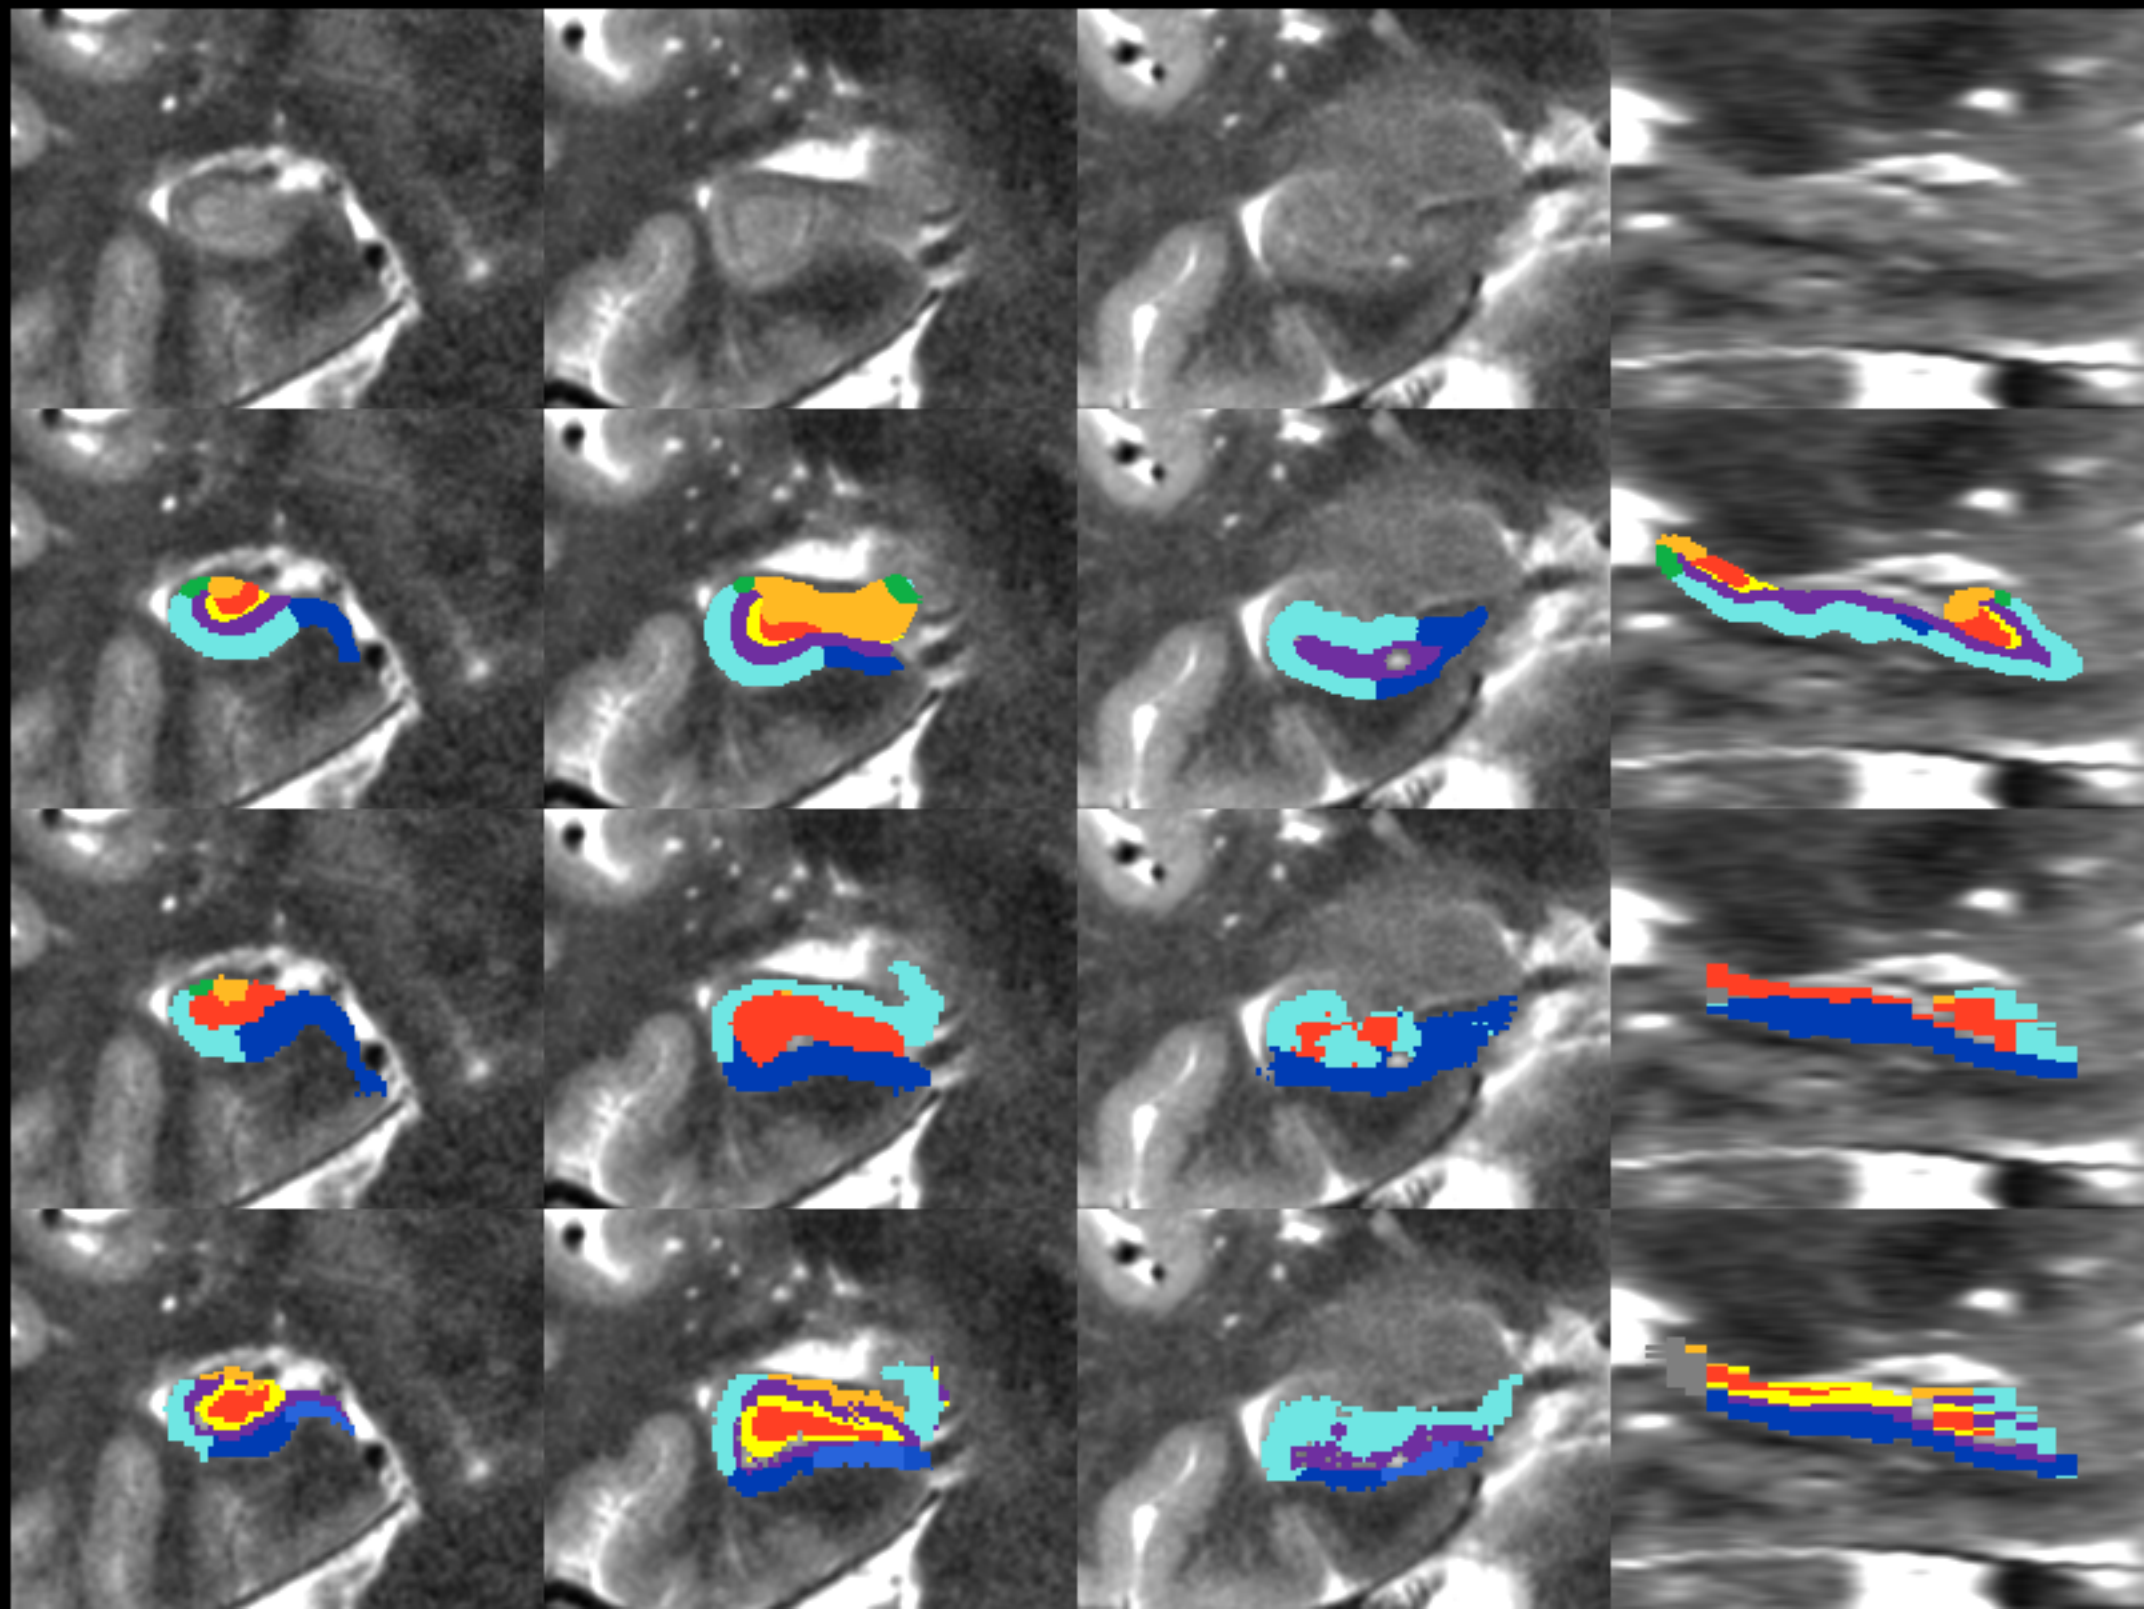

hemi=R,subject=6570677

MRI

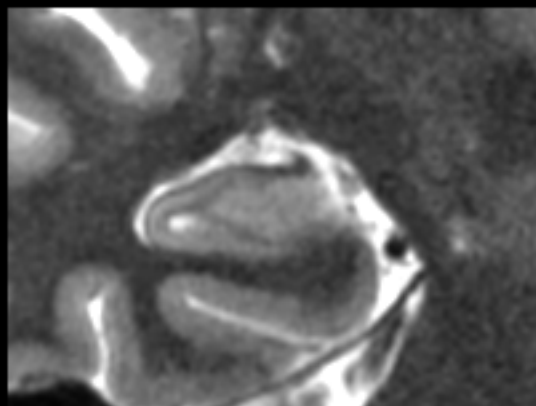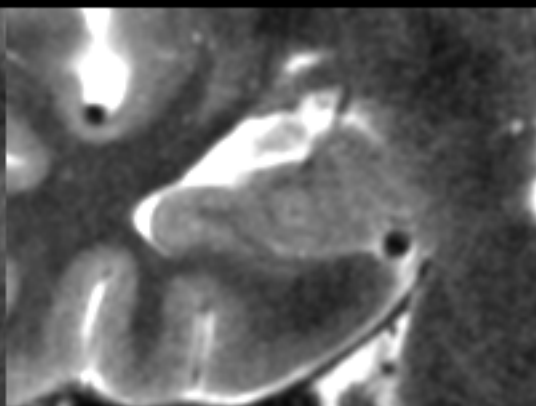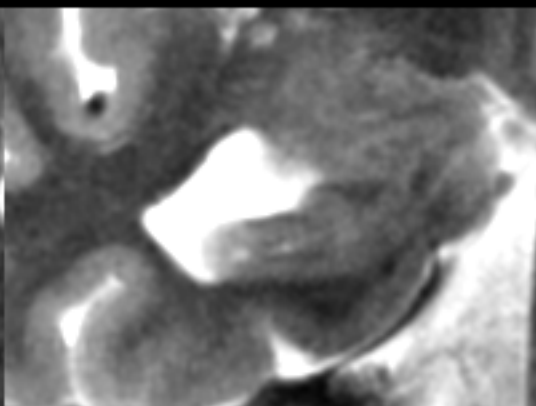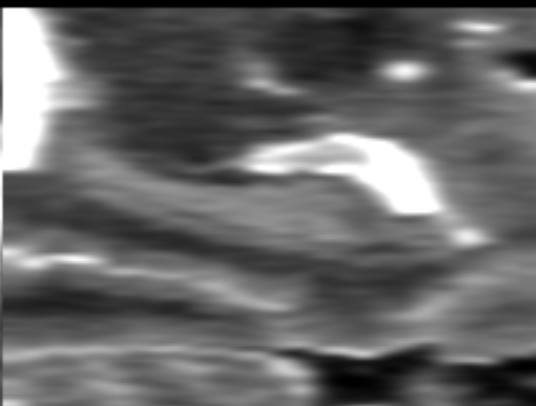

hippunfoldT1

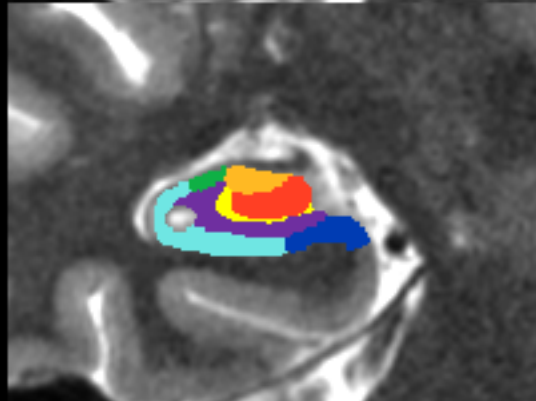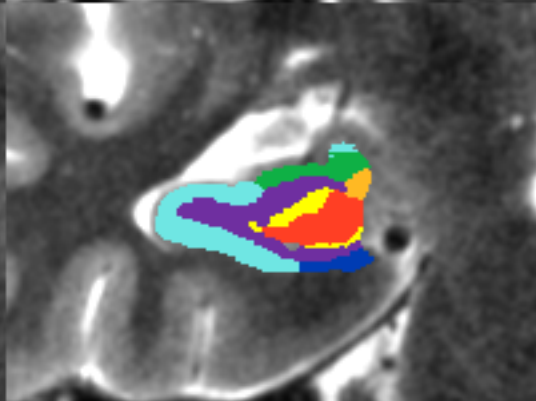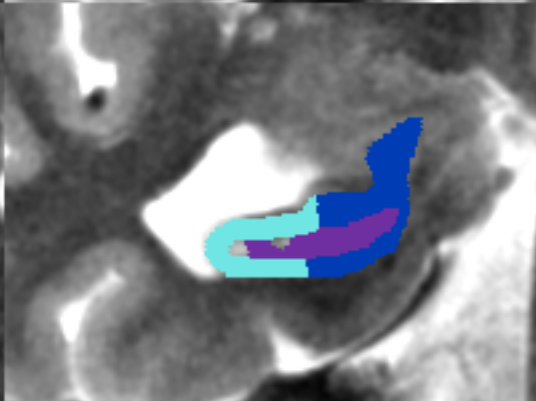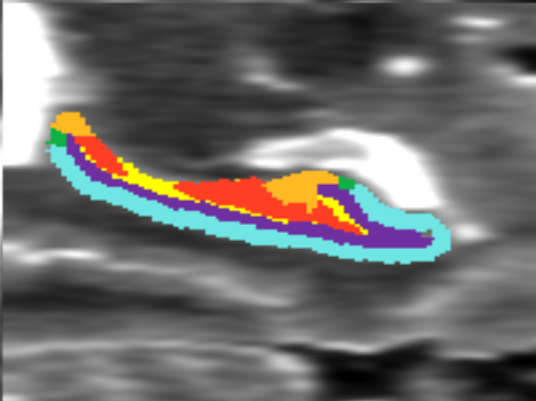

ashs

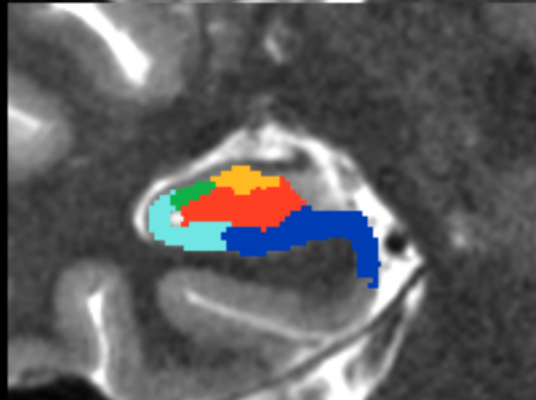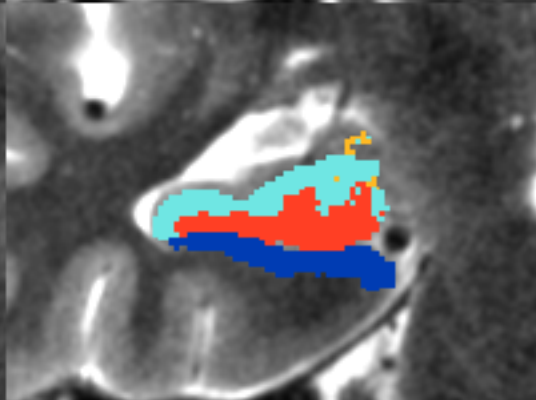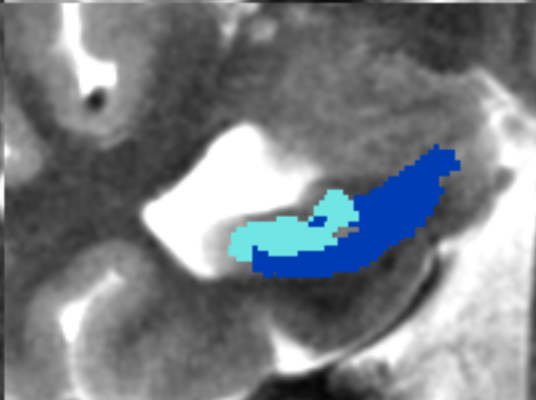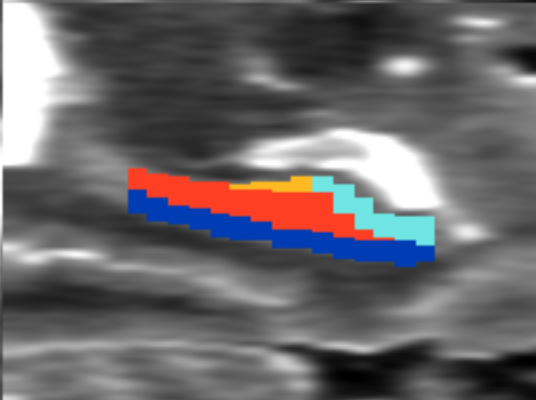

freesurfer

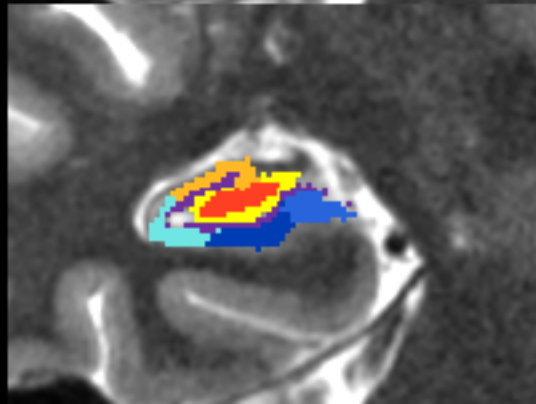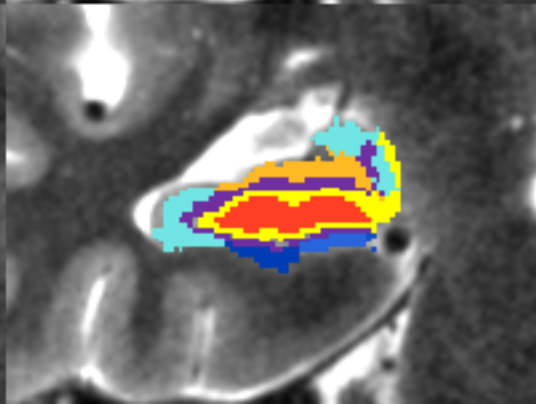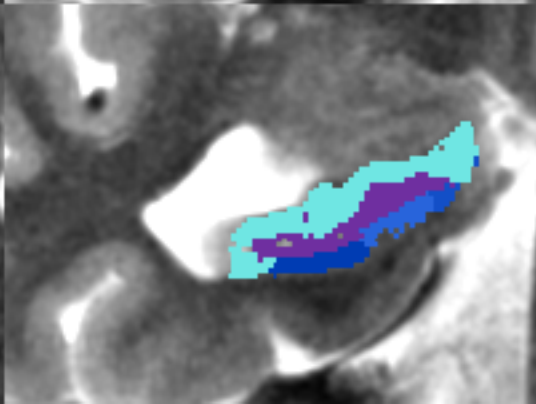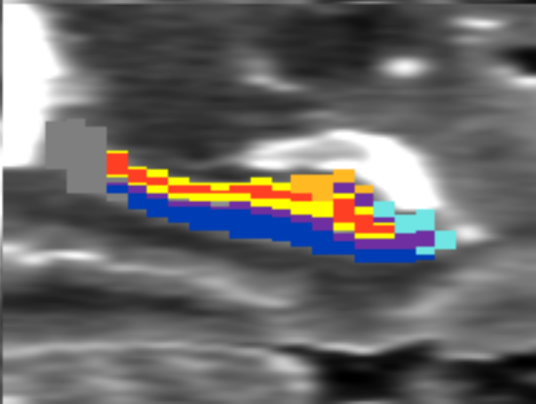

hemi=R,subject=6604264

MRI

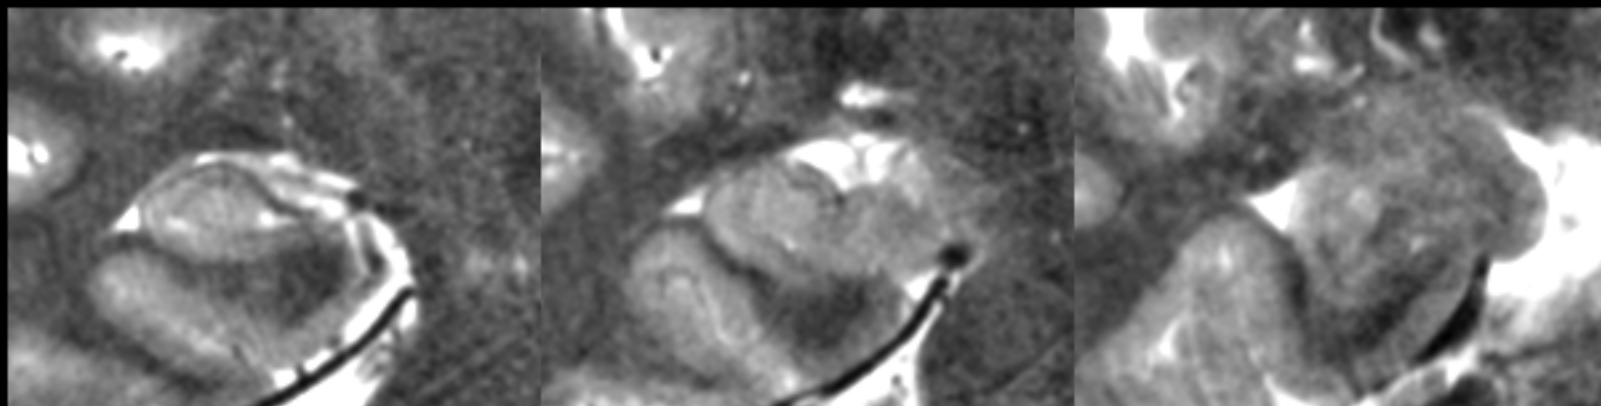

hippunfoldT1

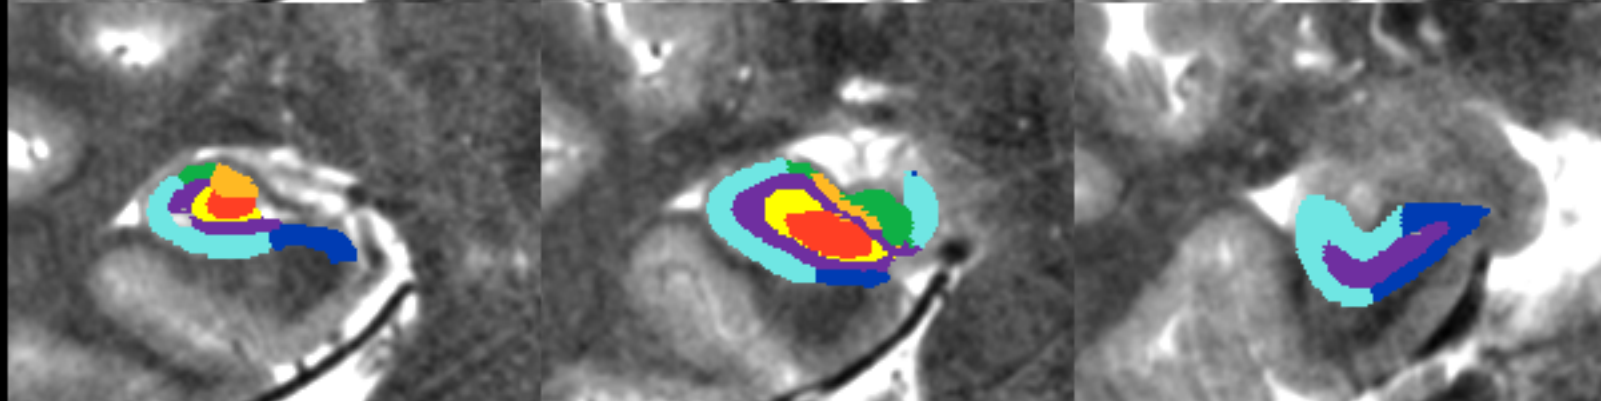

ashs

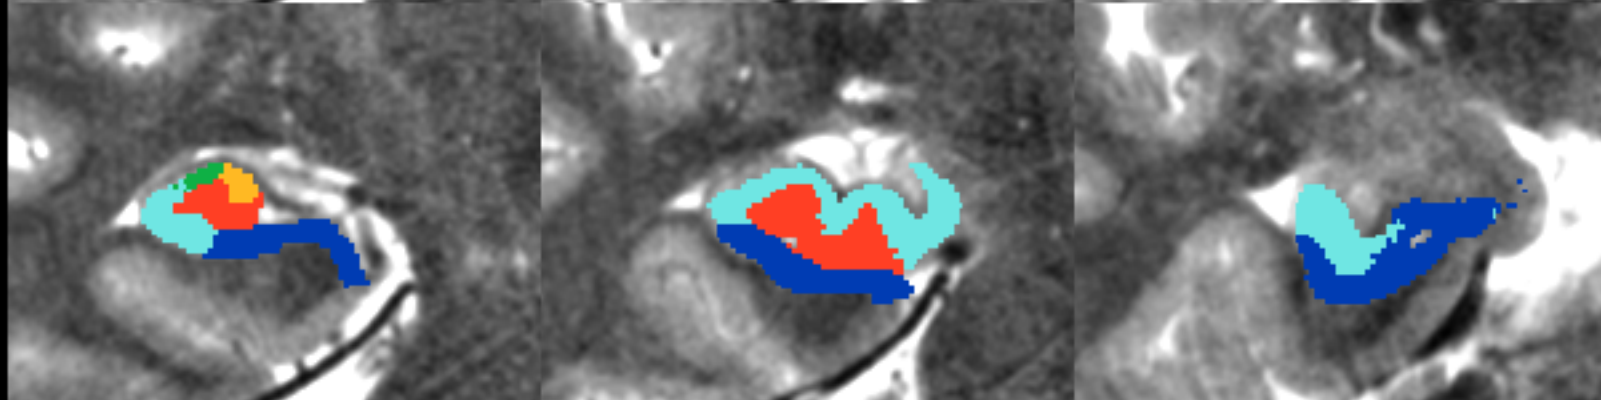

freesurfer

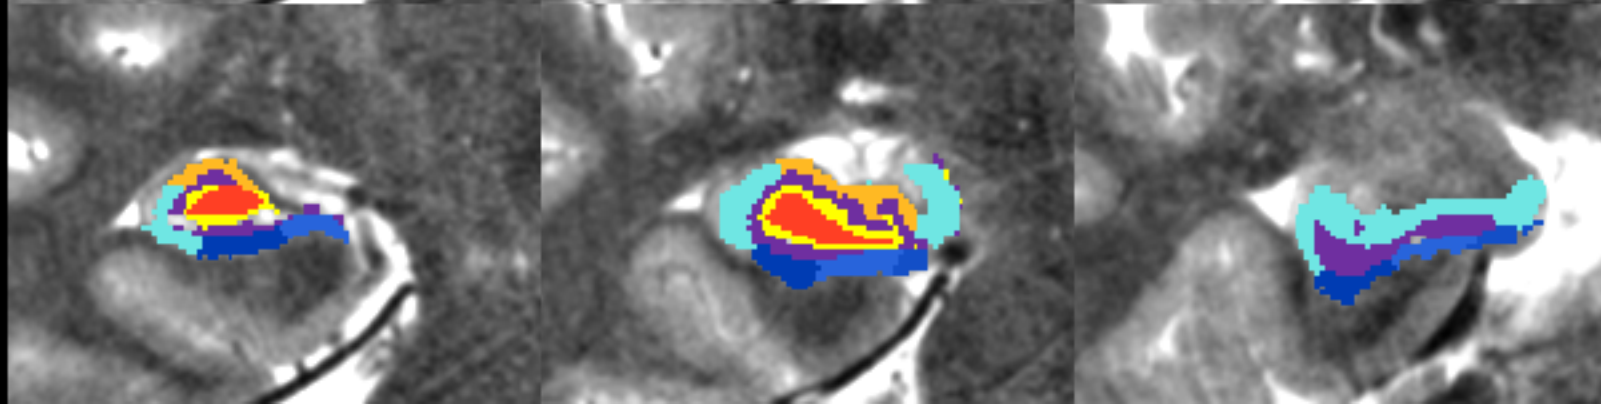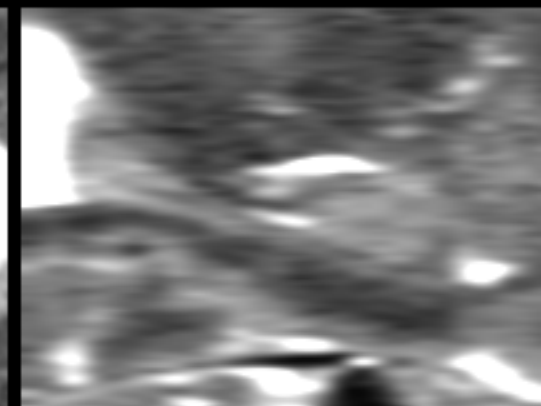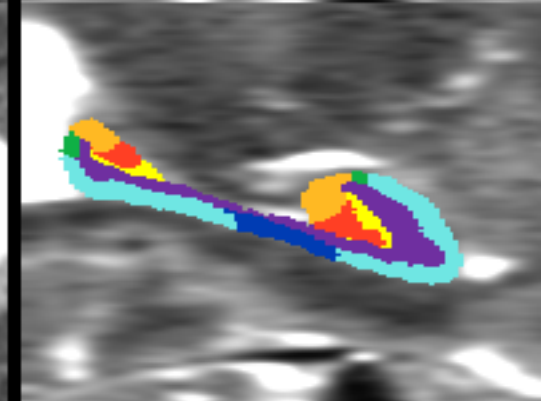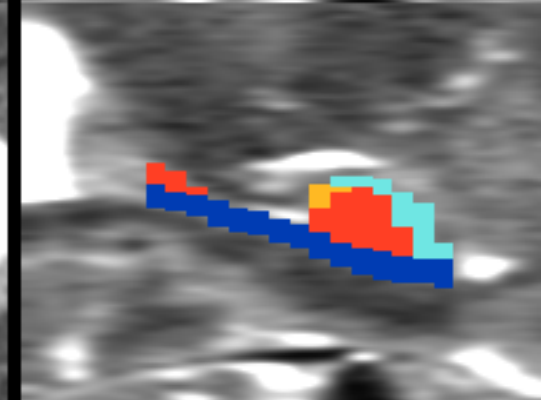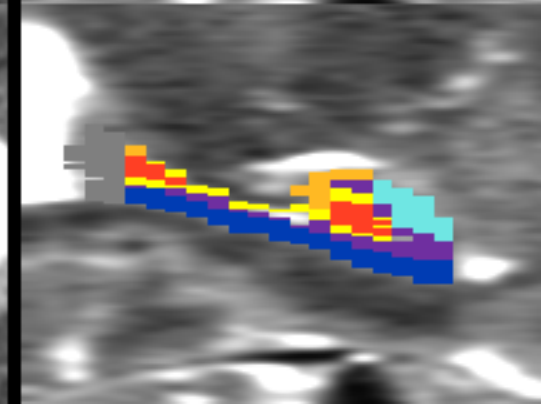

hemi=R,subject=6631671

MRI

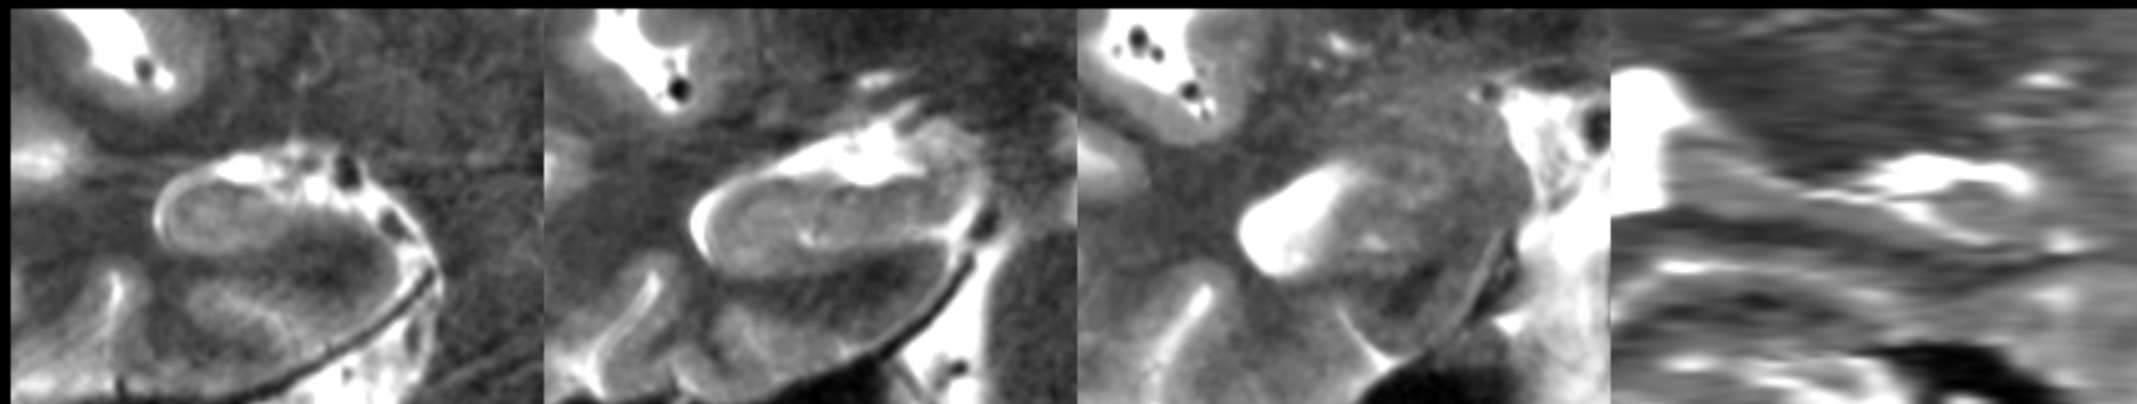

hippunfoldT1

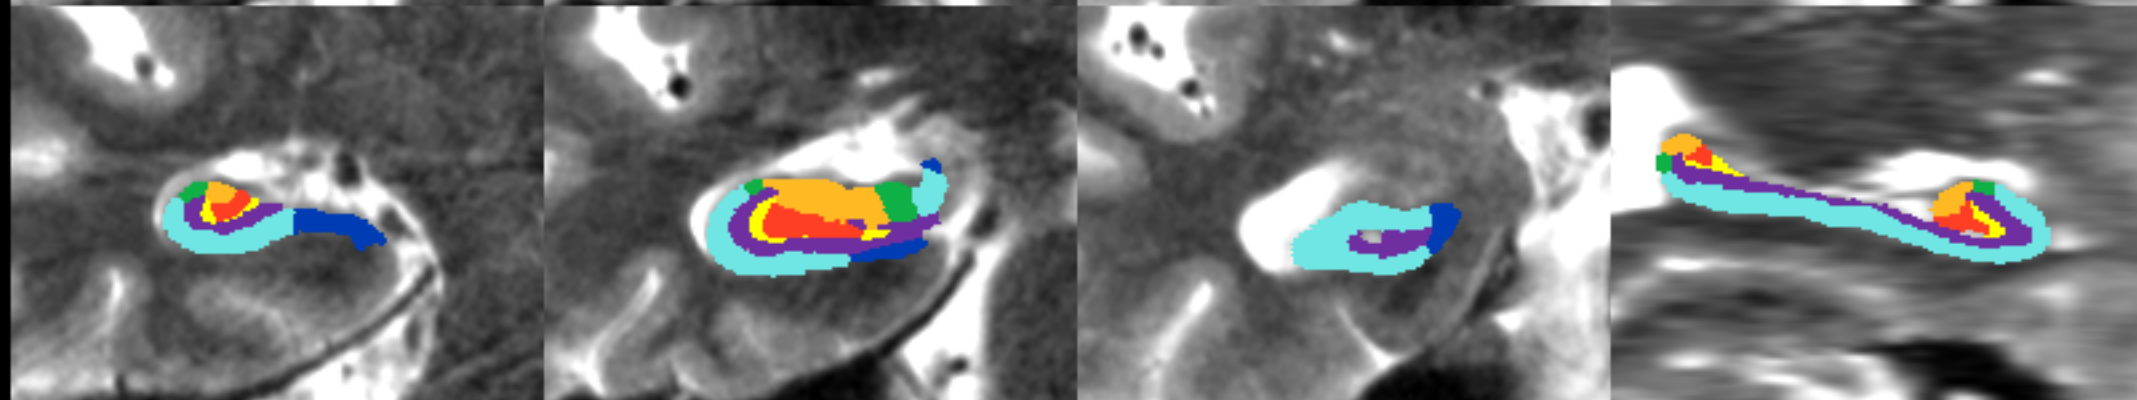

ashs

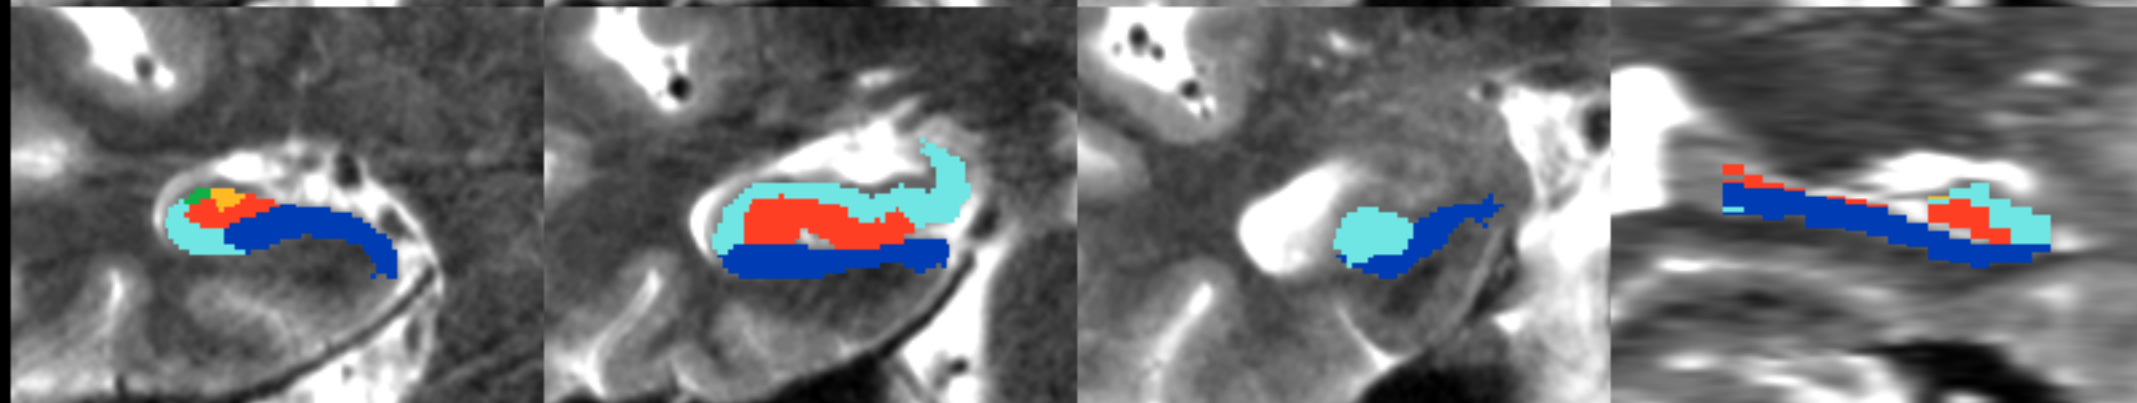

freesurfer

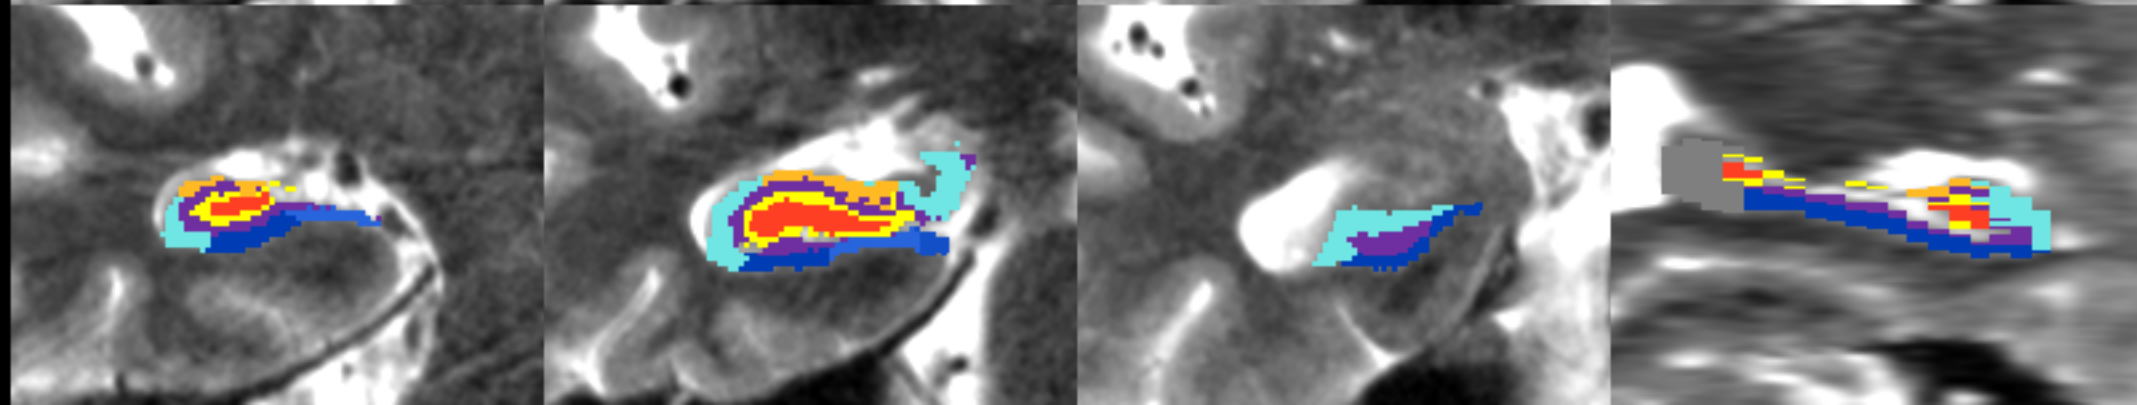

hemi=R,subject=6653277

MRI

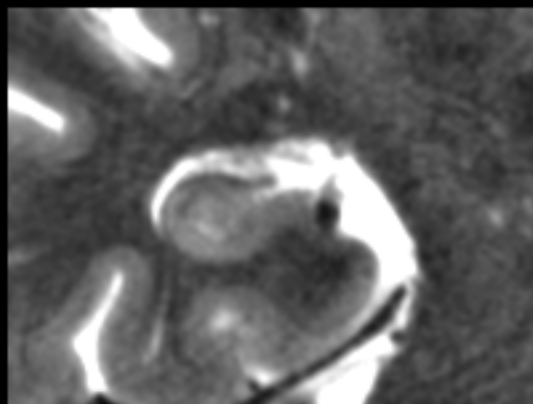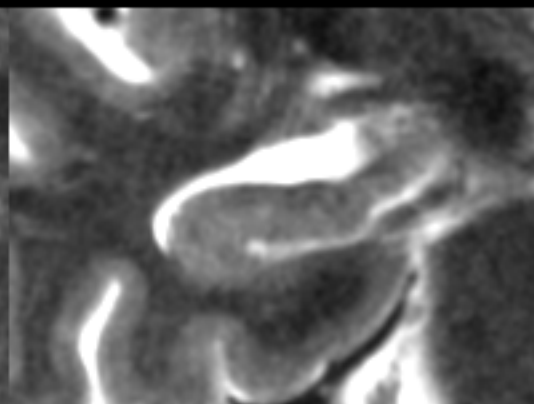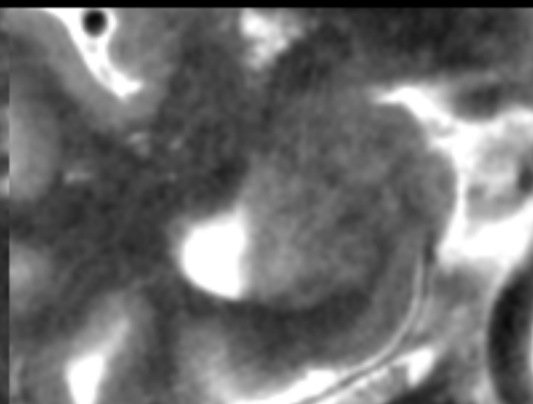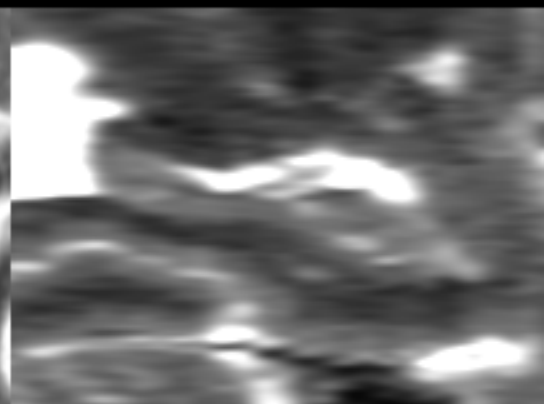

hippunfoldT1

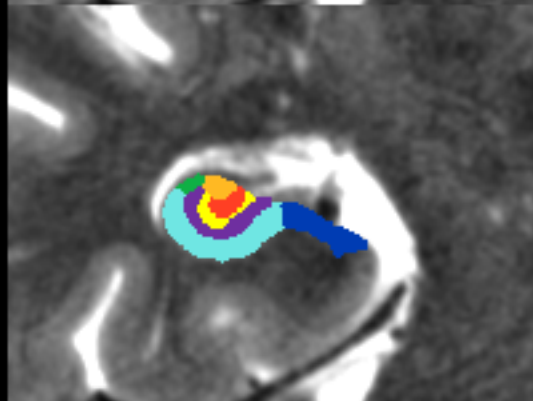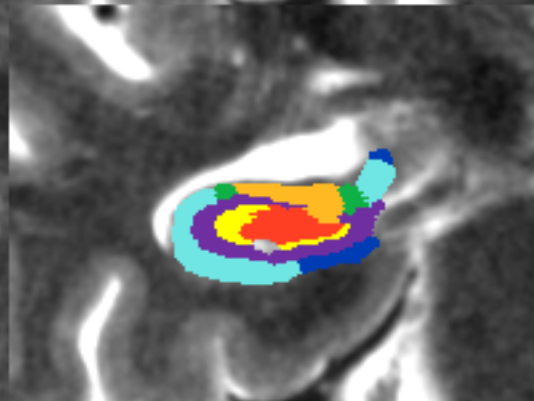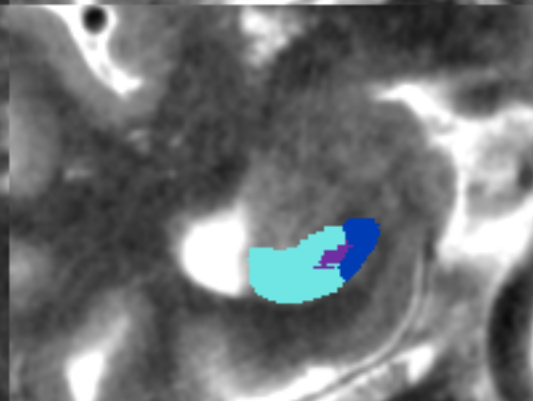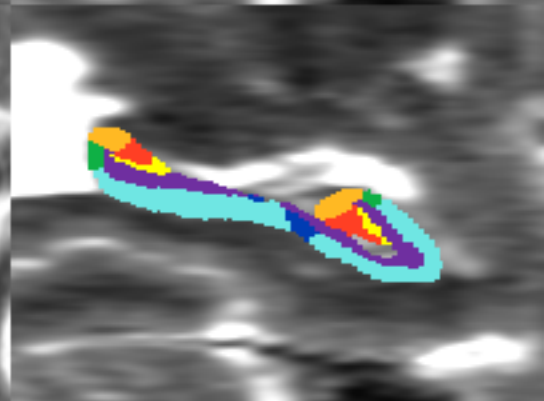

ashs

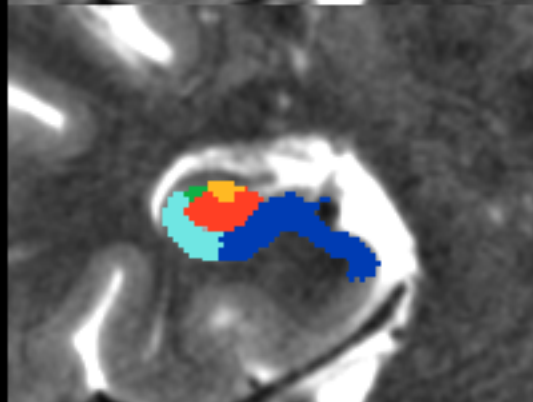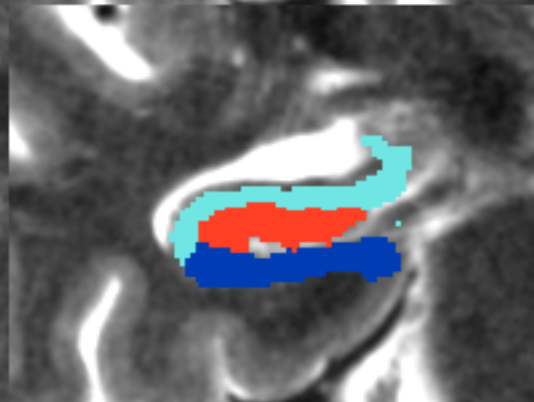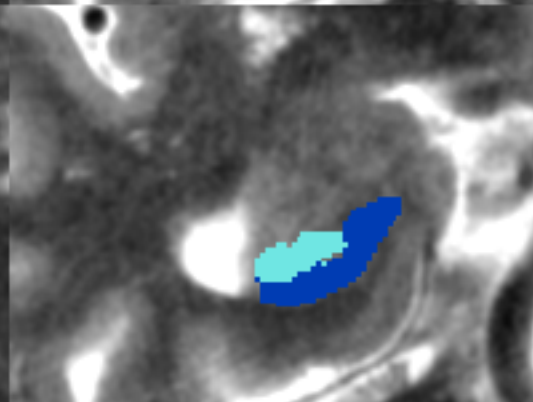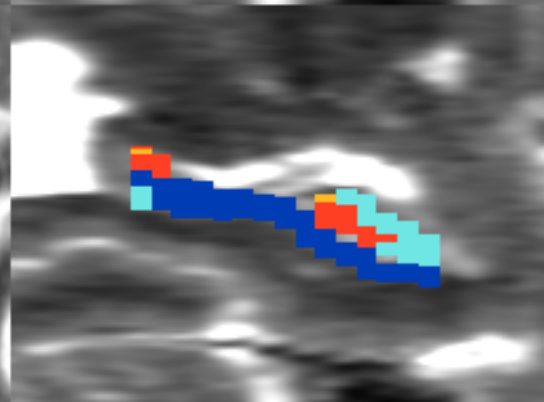

freesurfer

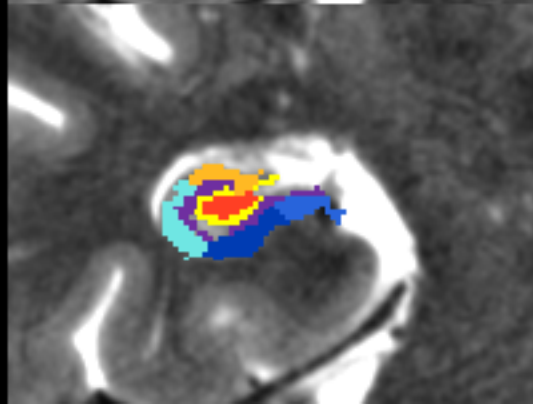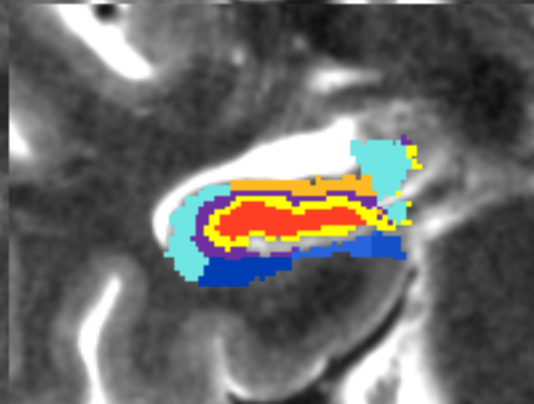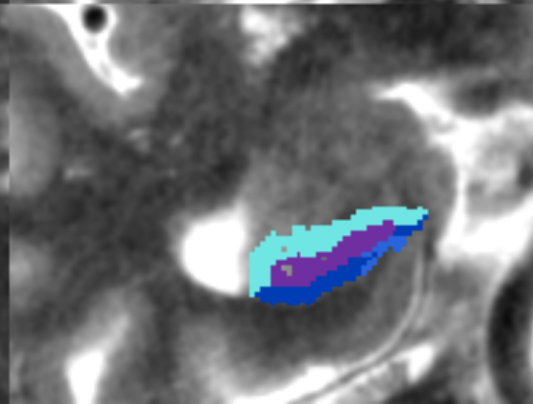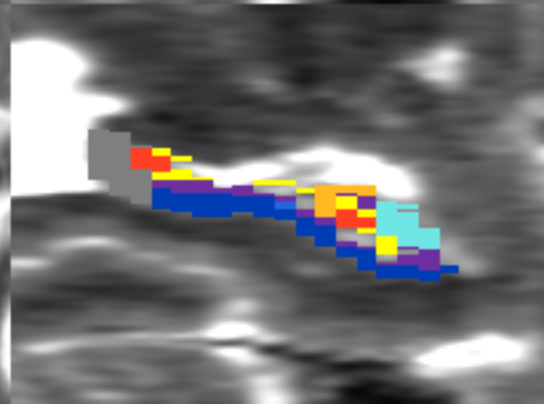

hemi=R,subject=6686191

MRI

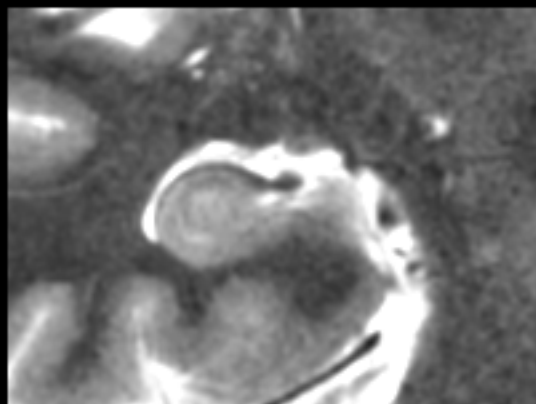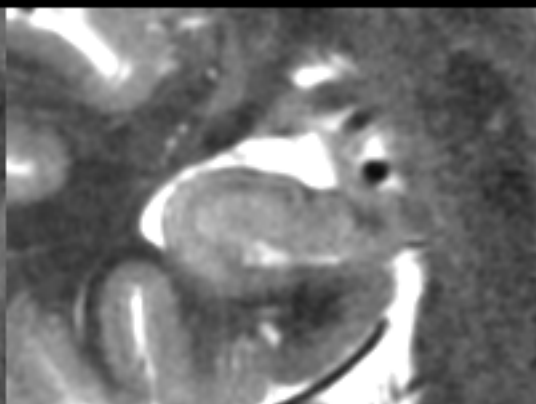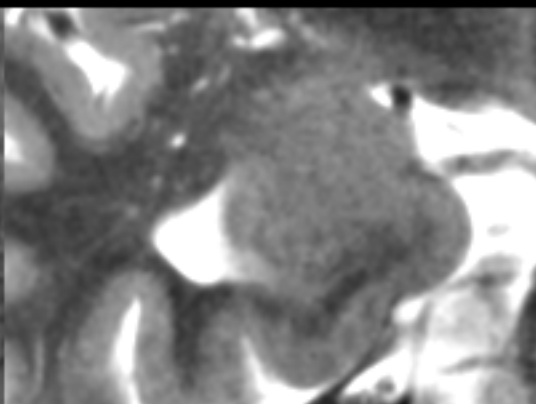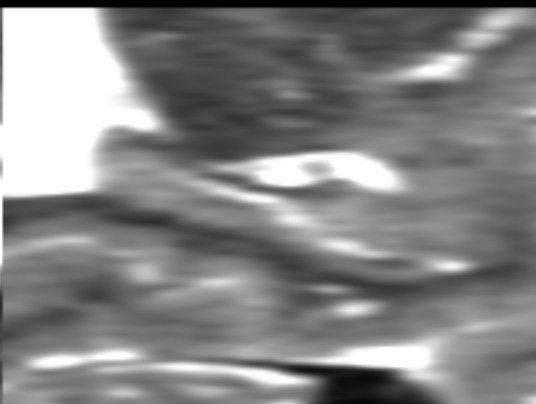

hippunfoldT1

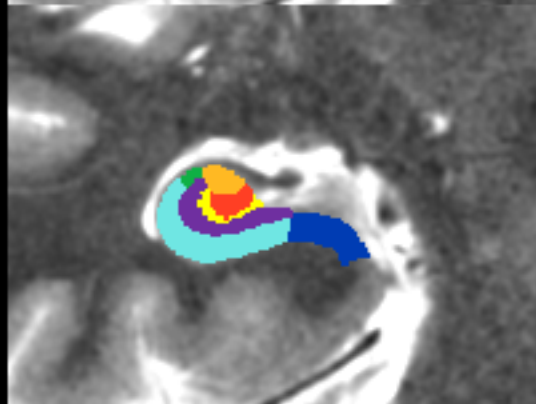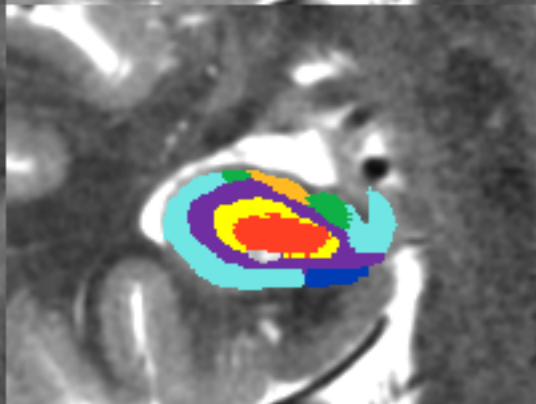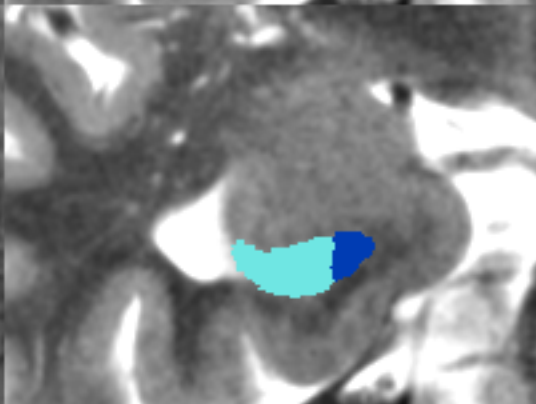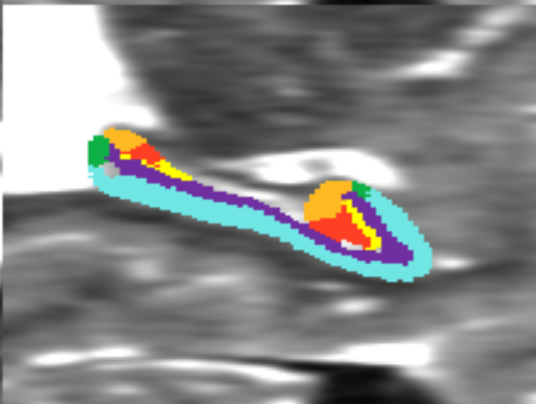

ashs

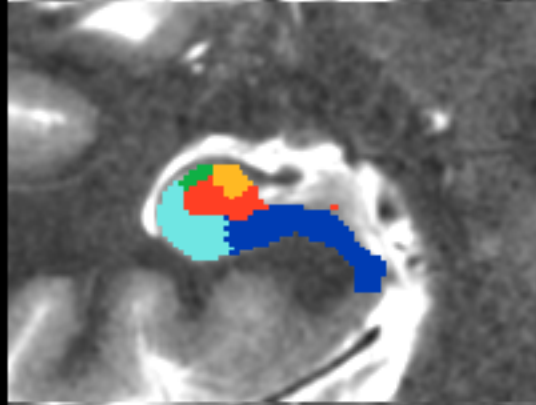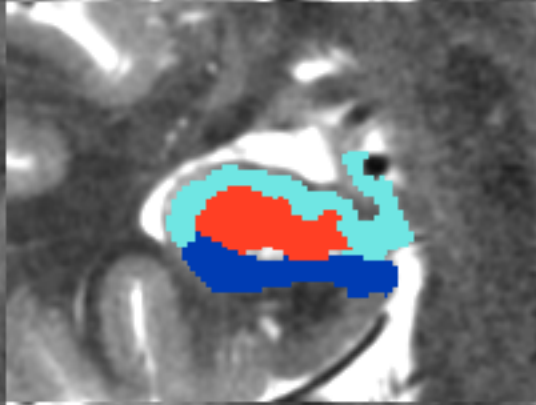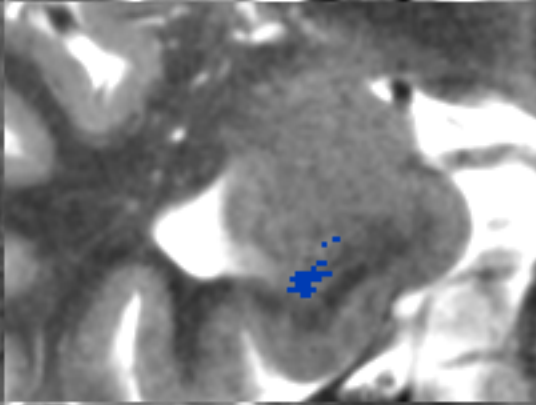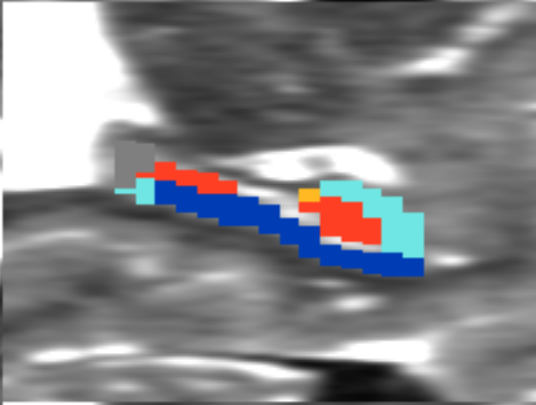

freesurfer

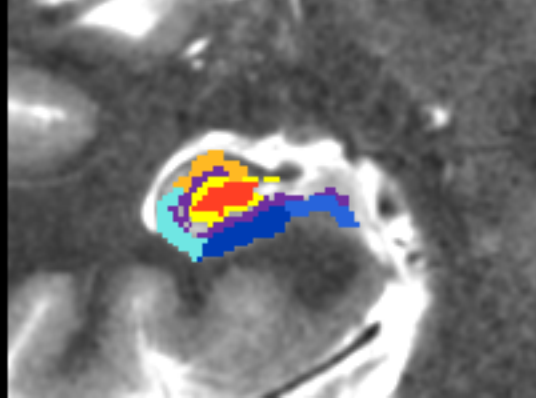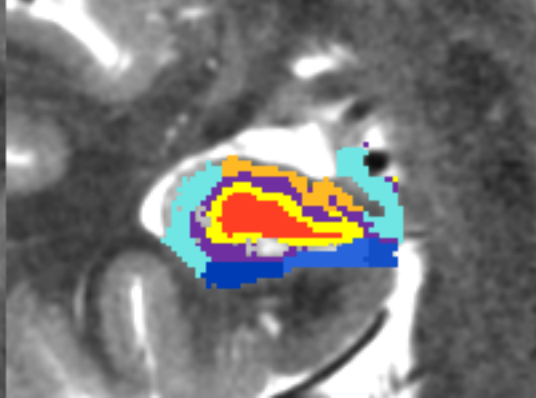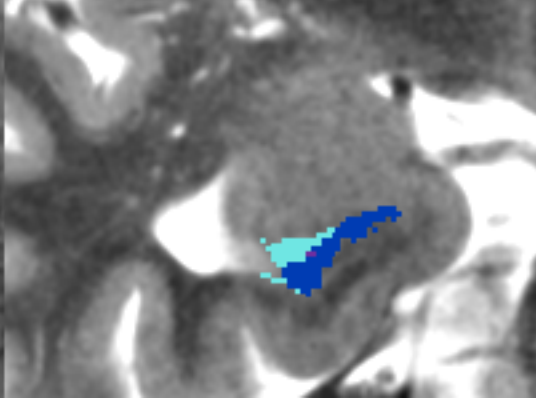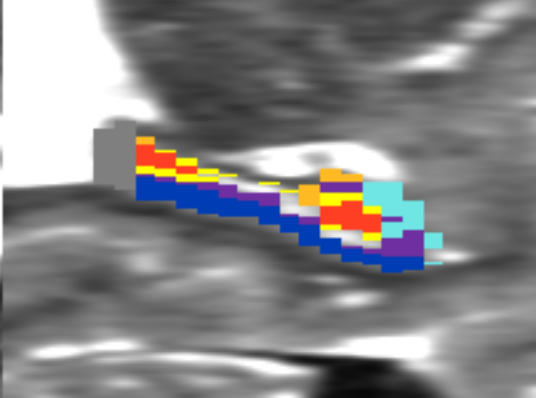

hemi=R,subject=6732374

MRI

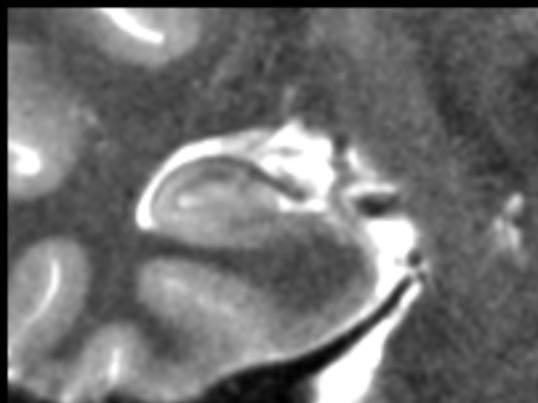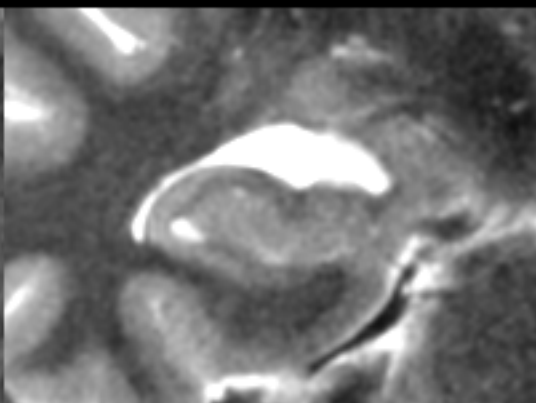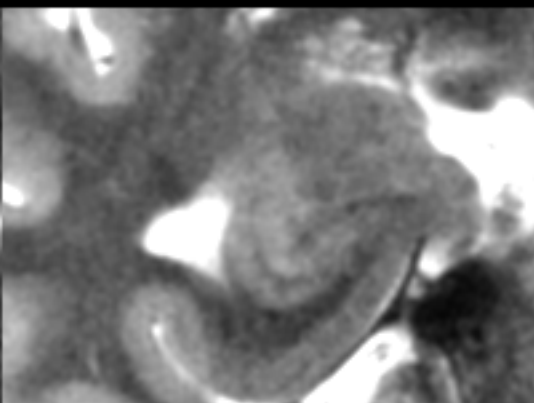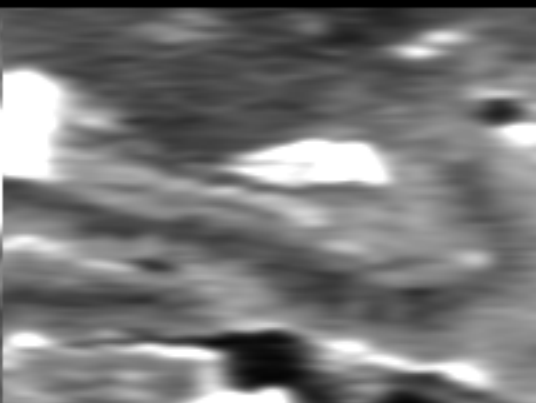

hippunfoldT1

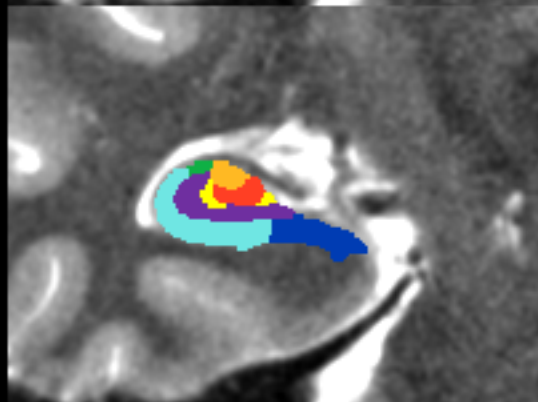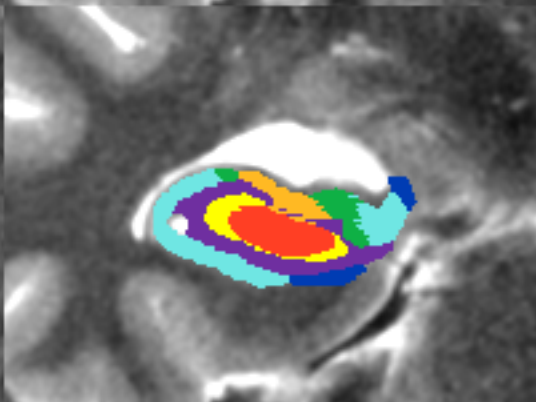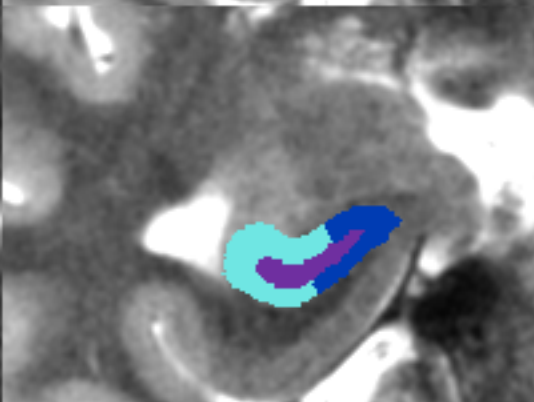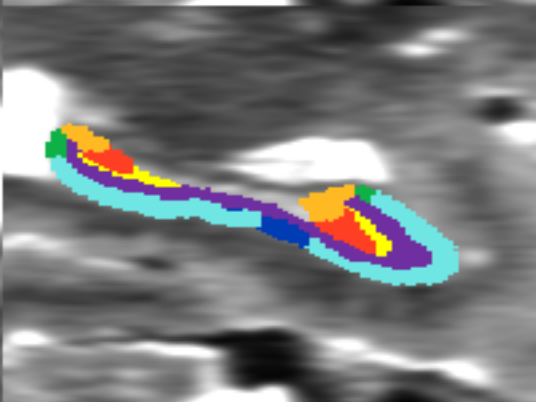

ashes

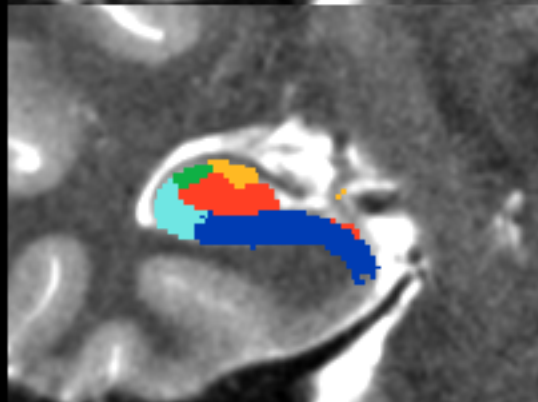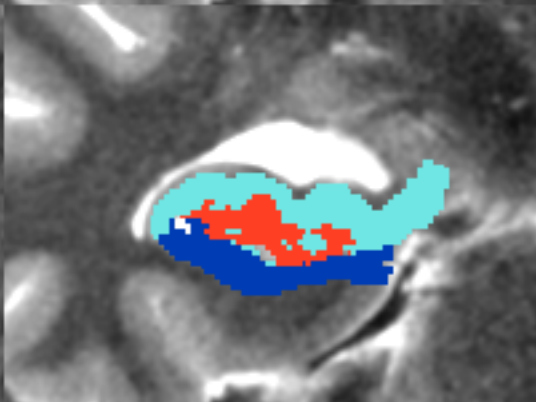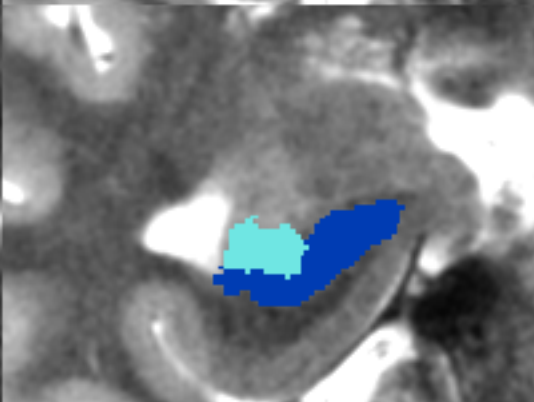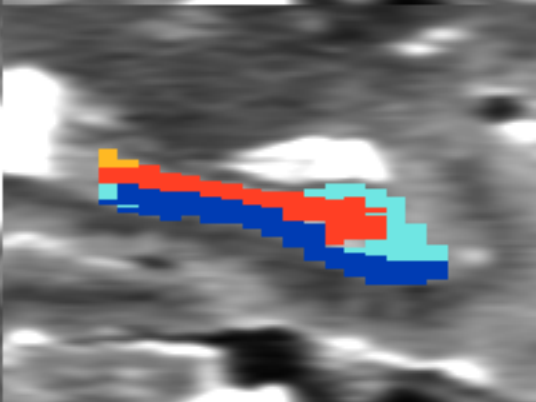

freesurfer

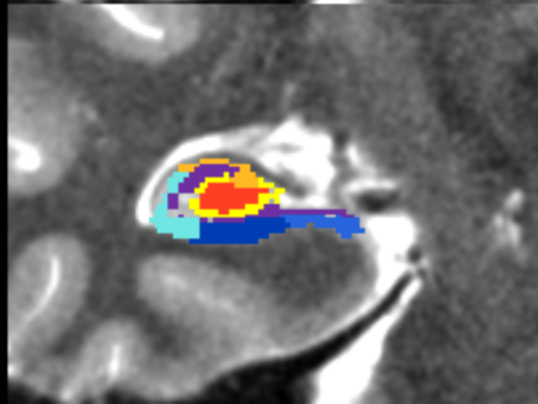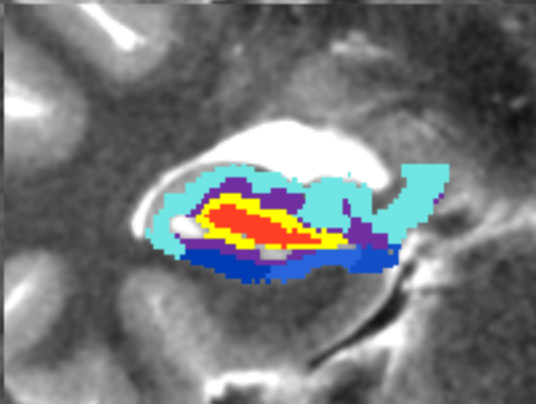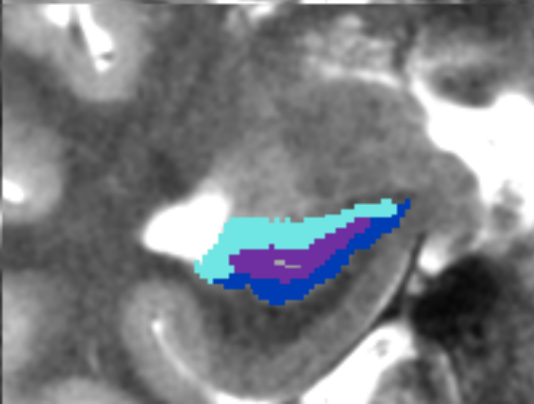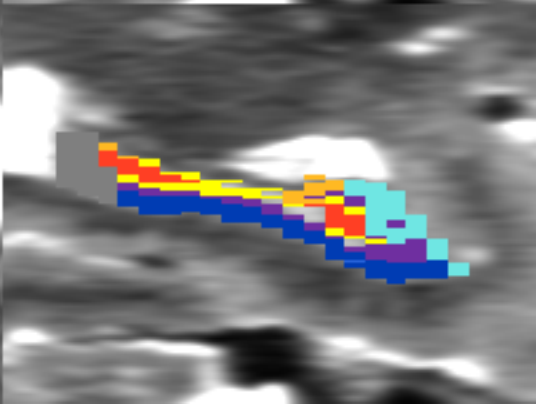

hemi=R,subject=6752784

MRI

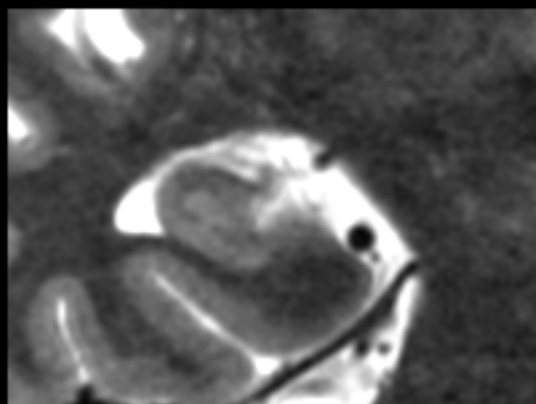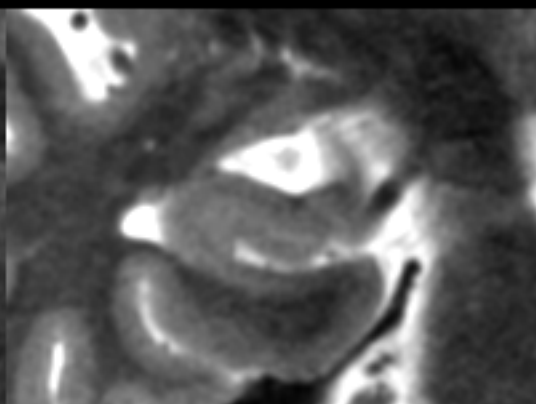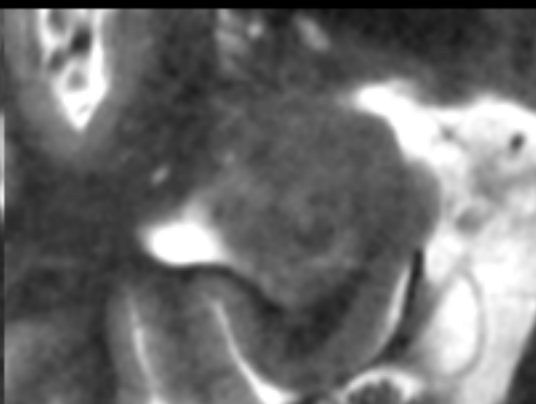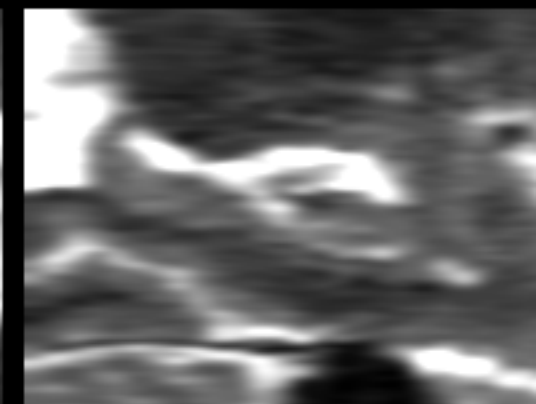

hippunfoldT1

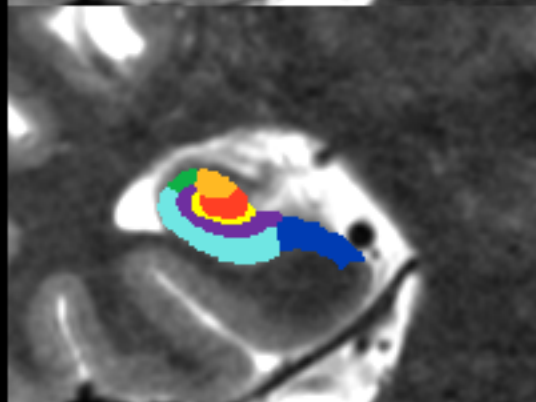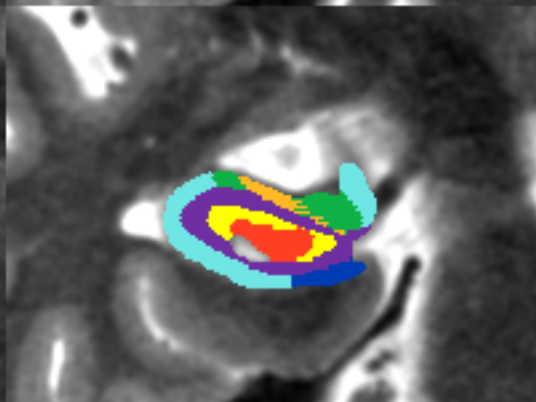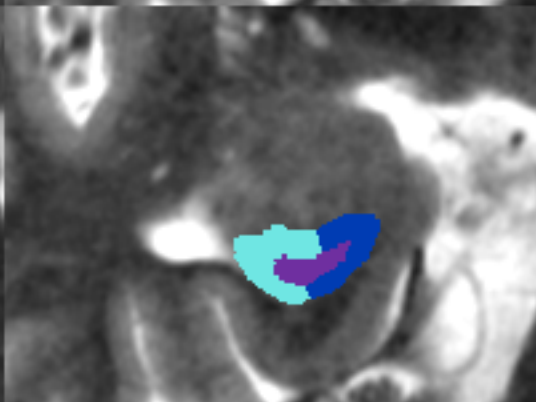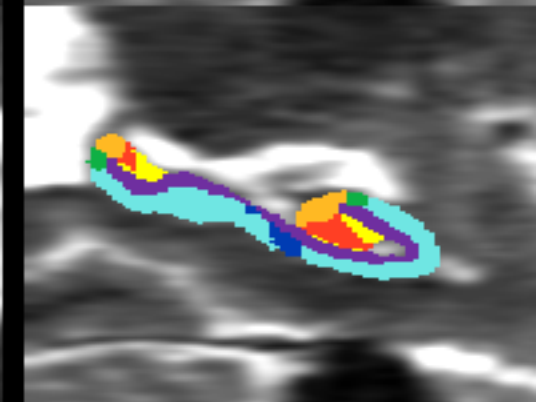

ashs

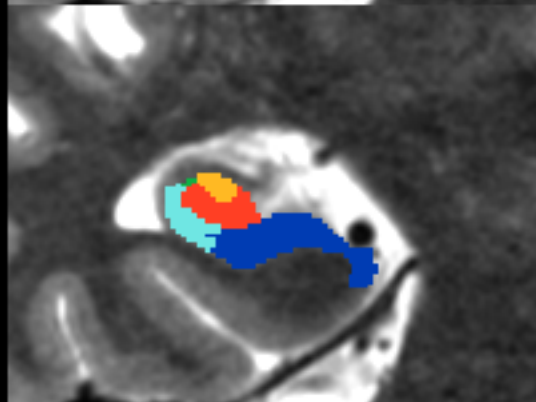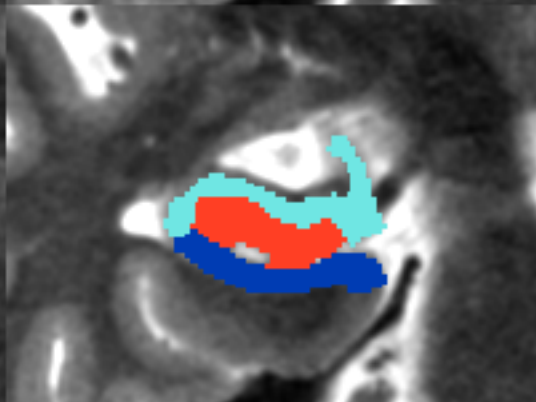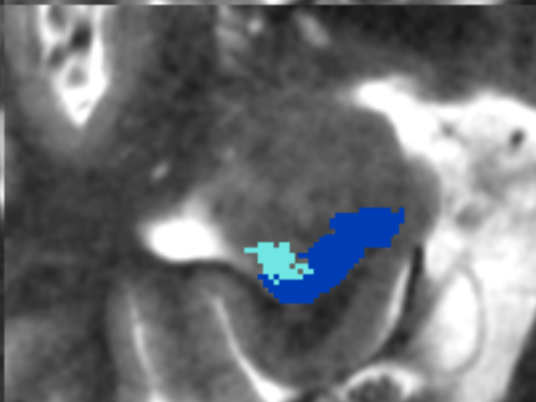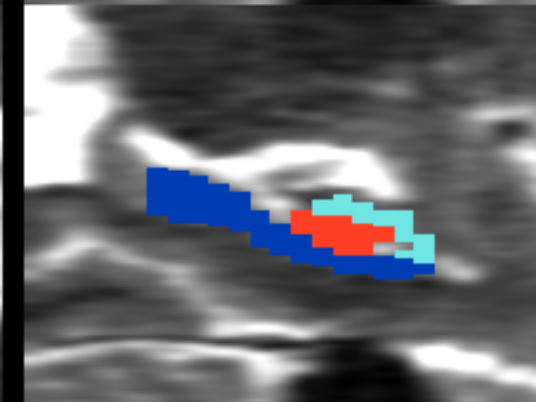

freesurfer

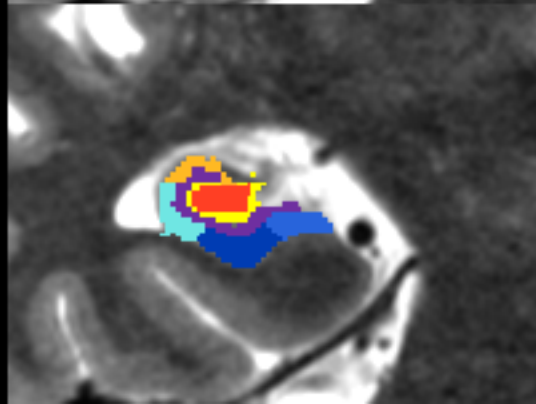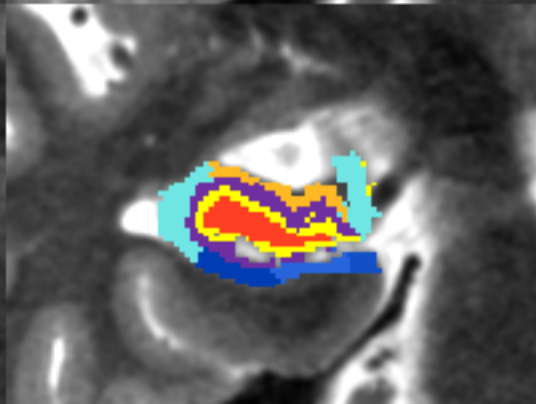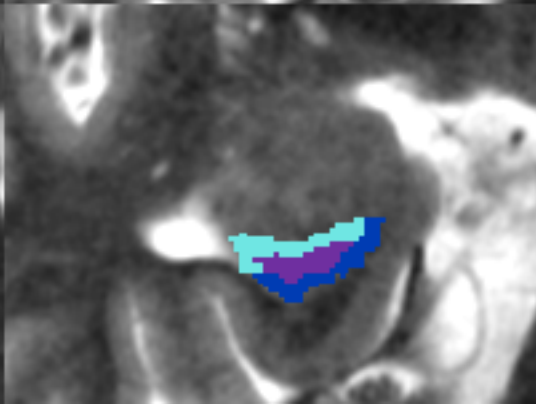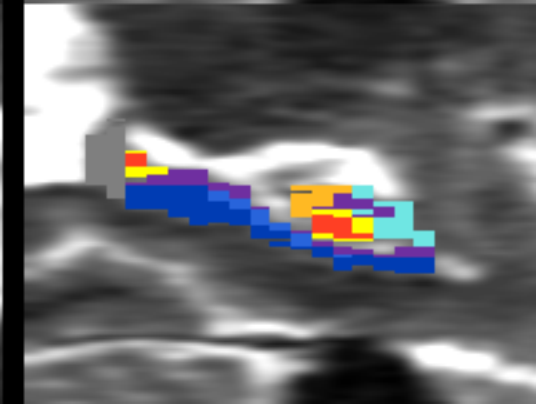



hemi=R,subject=6771081

MRI

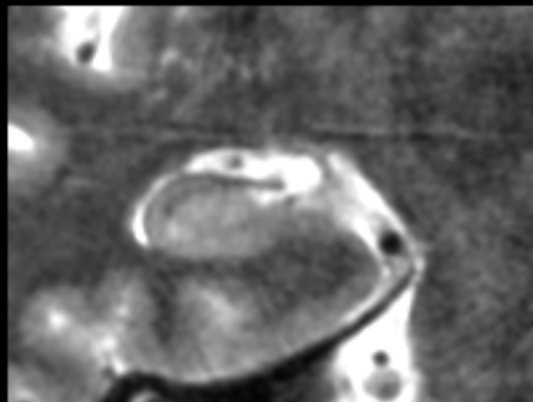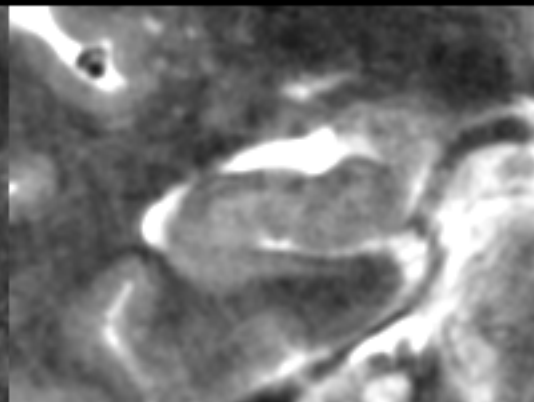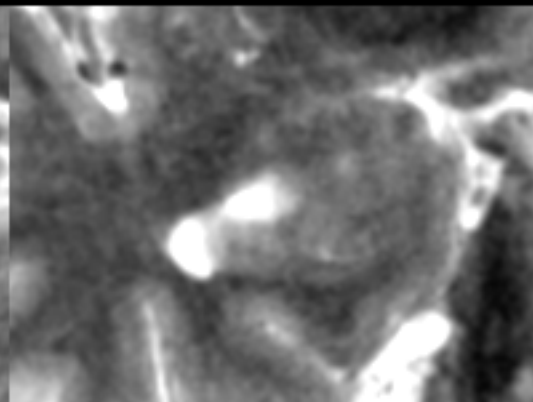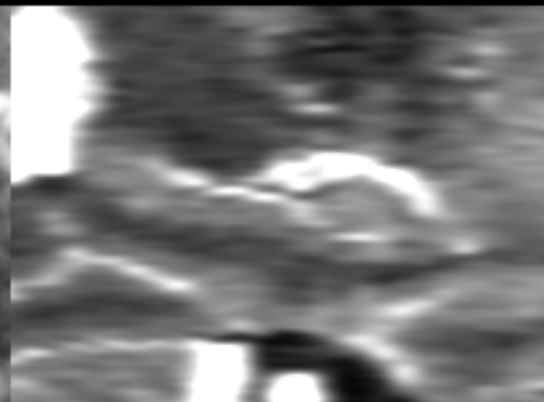

hippunfoldT1

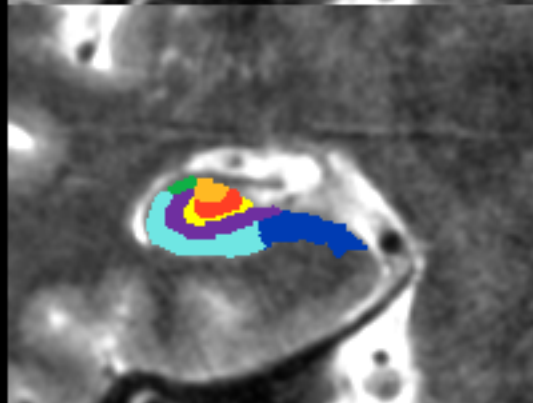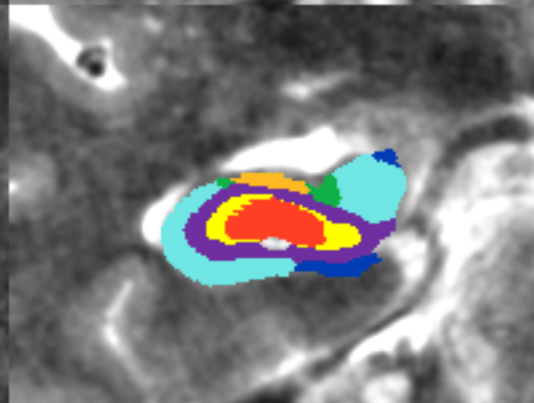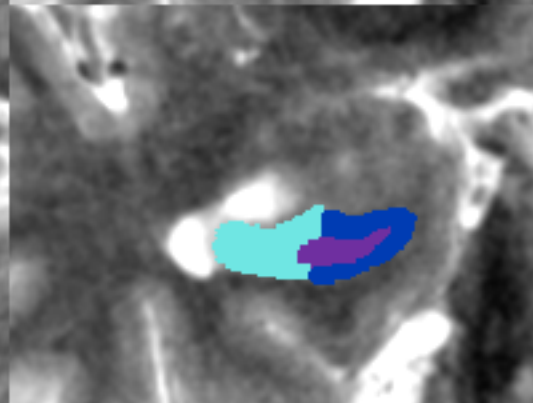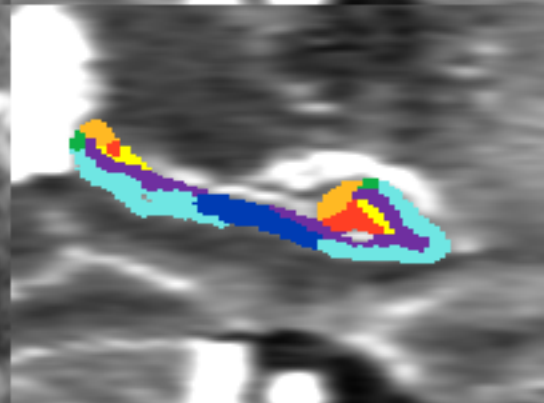

ashs

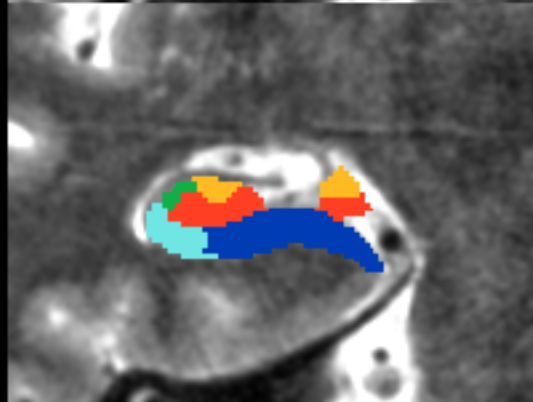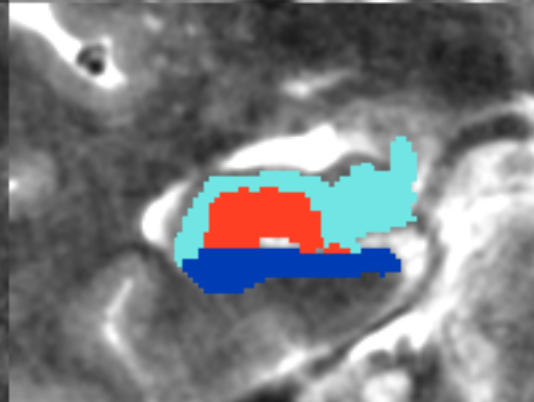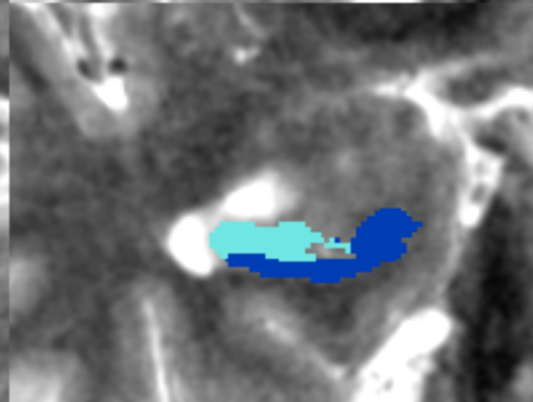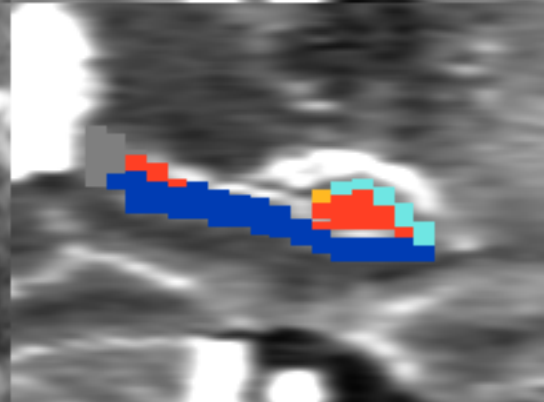

freesurfer

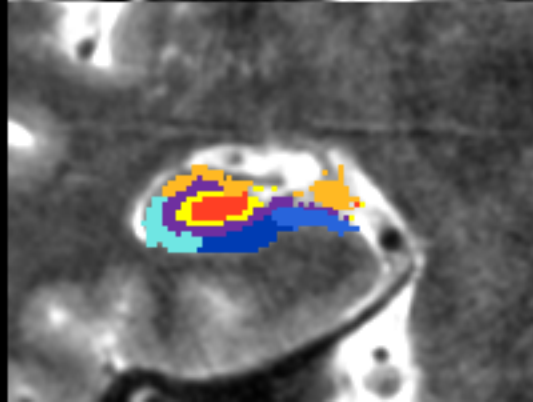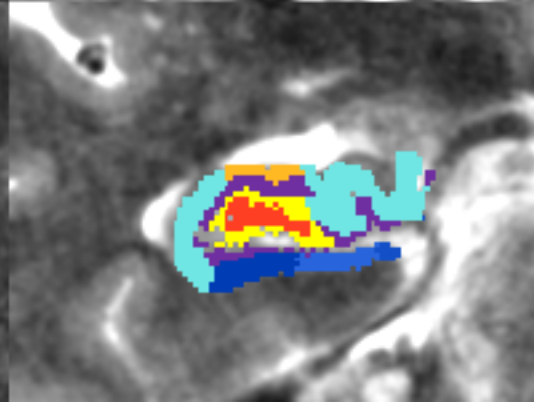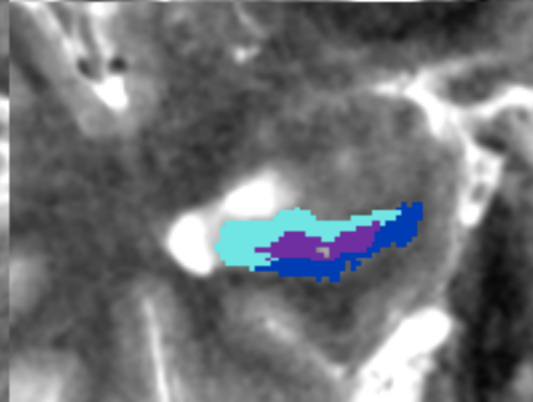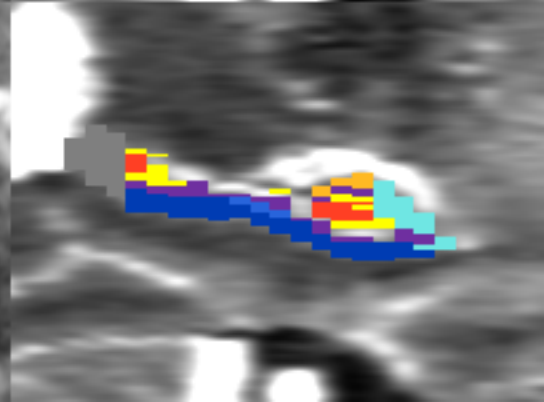

hemi=R,subject=6880490

MRI

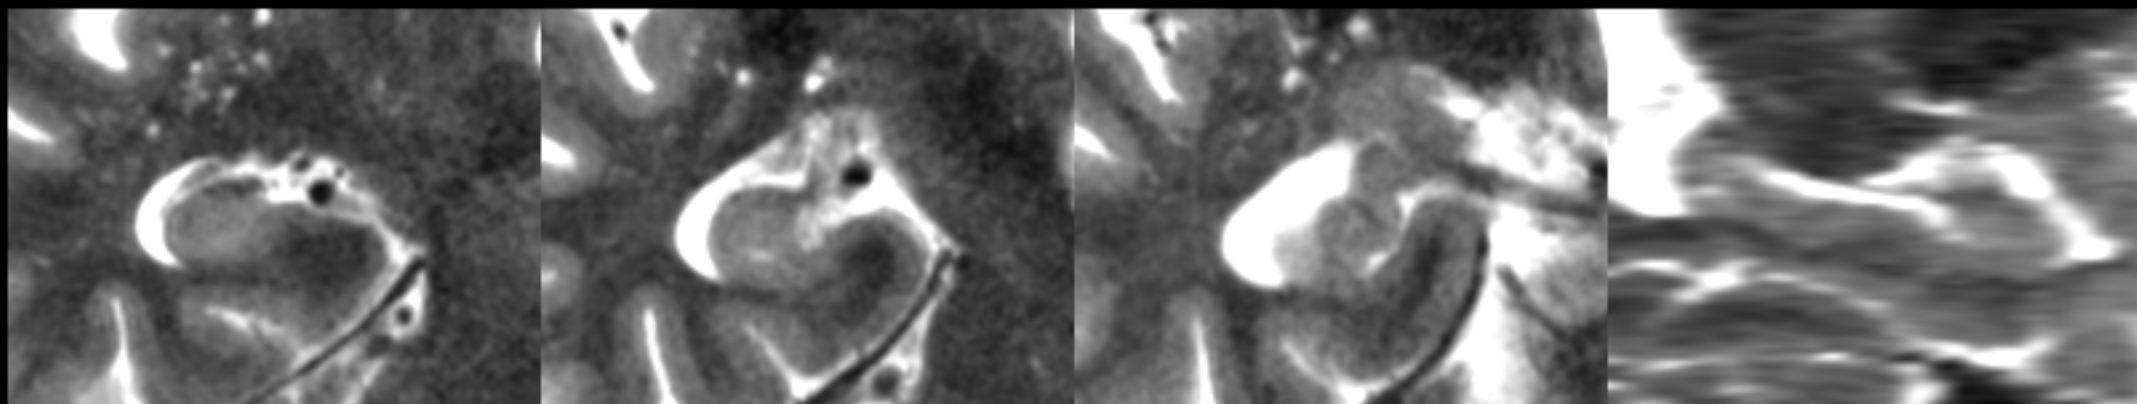

hippunfoldT1

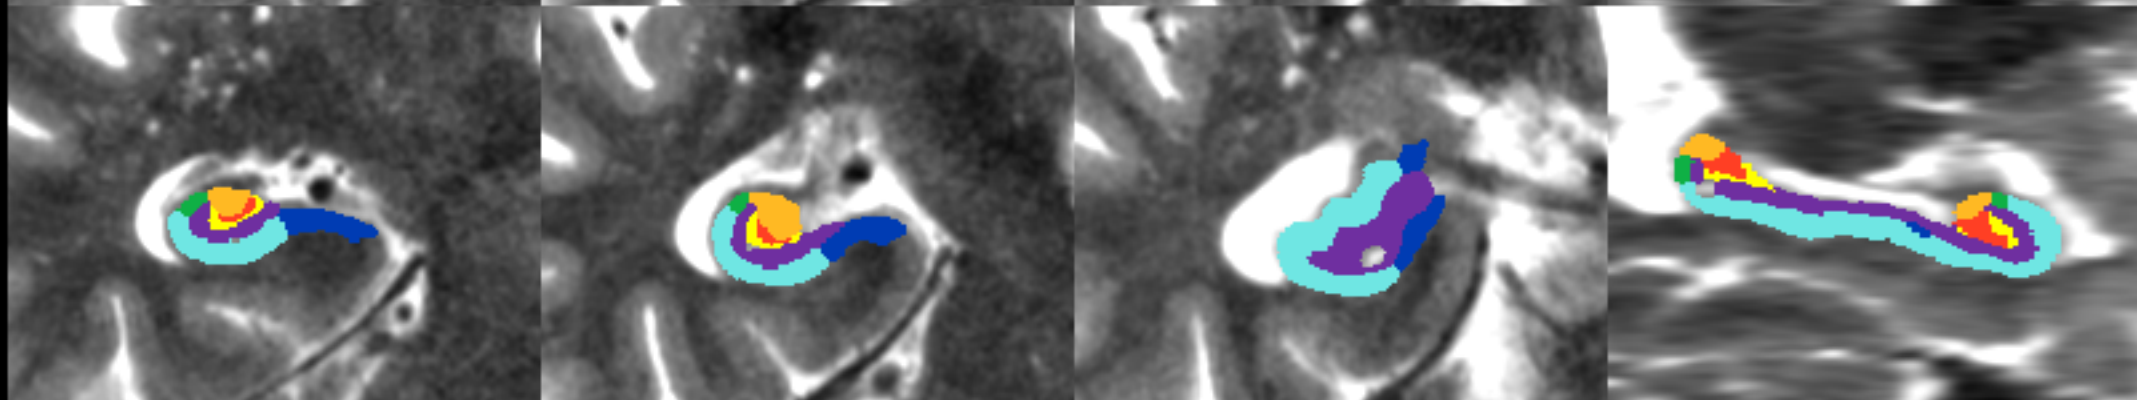

ashs

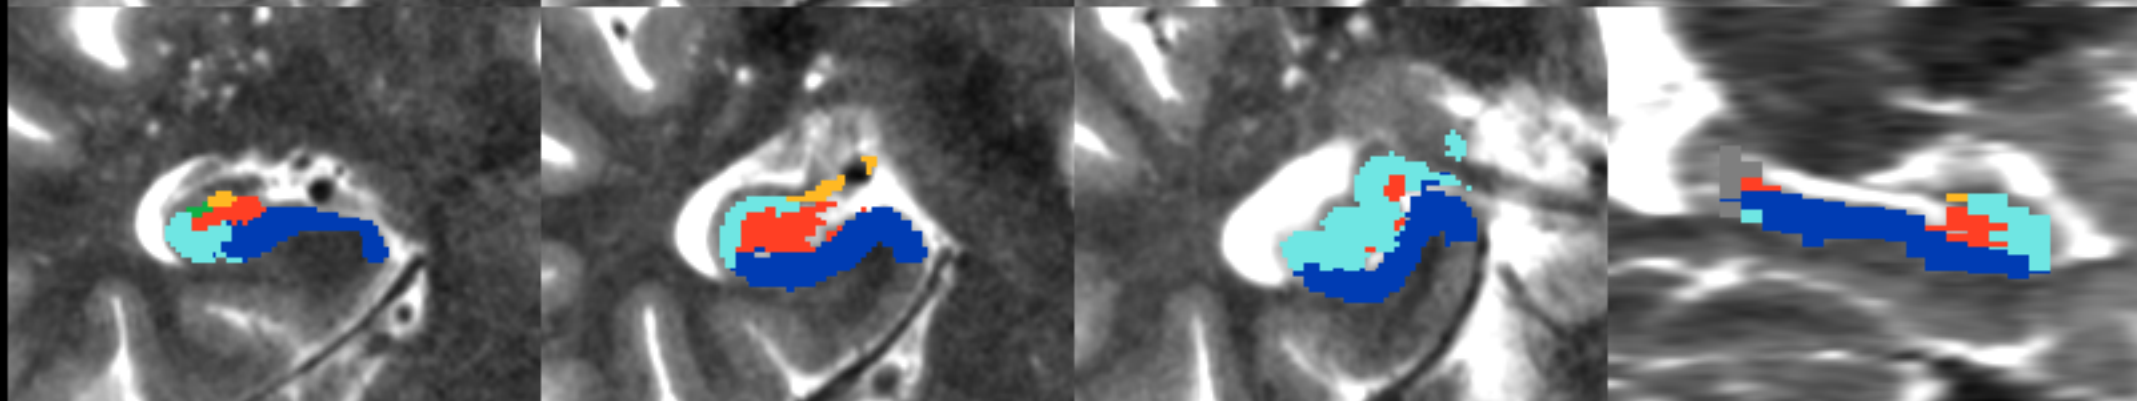

freesurfer

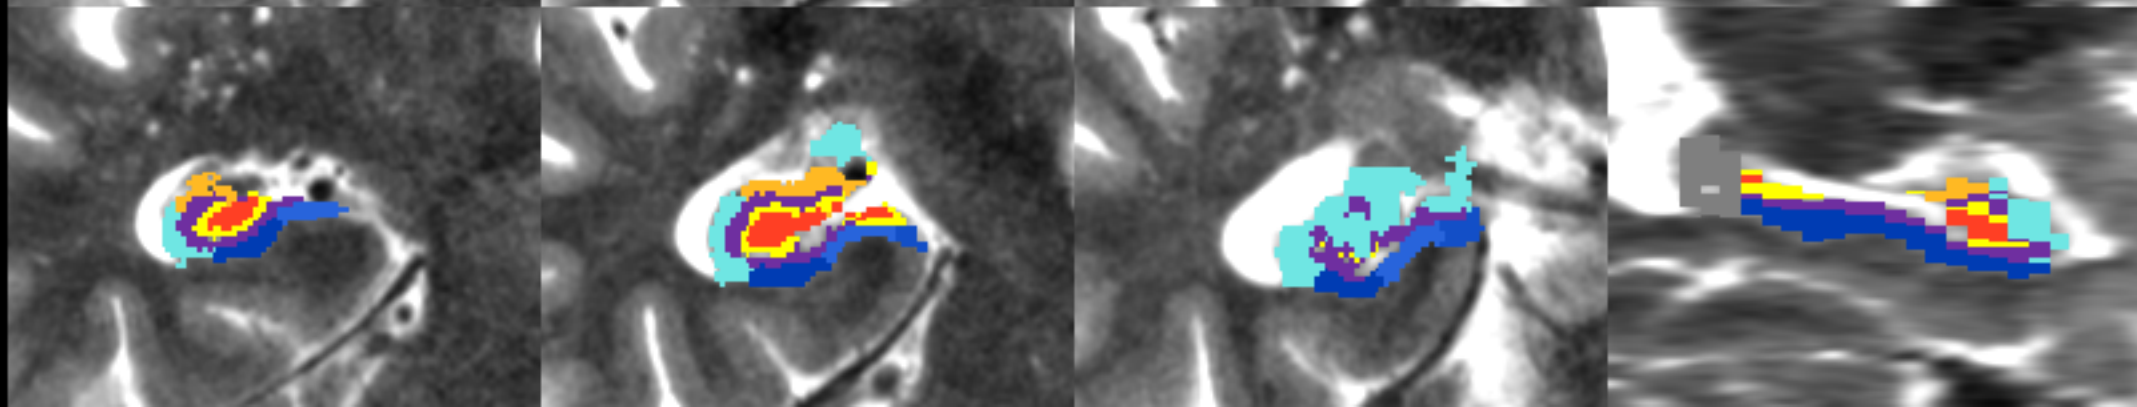

hemi=R,subject=6937998

MRI

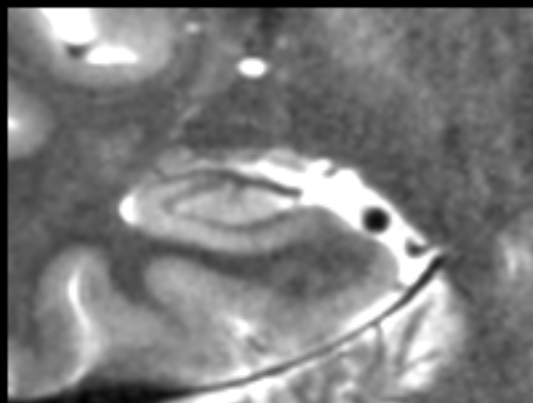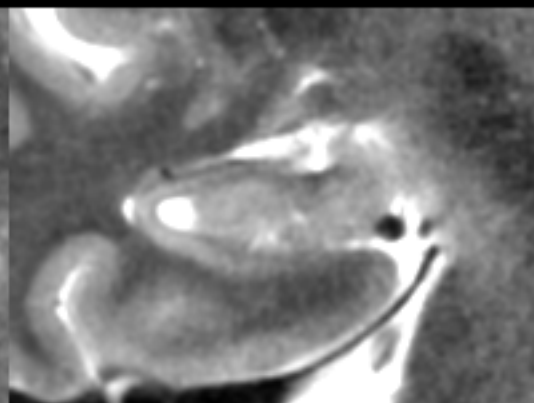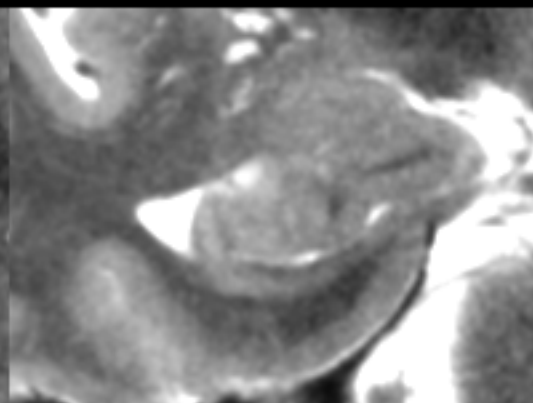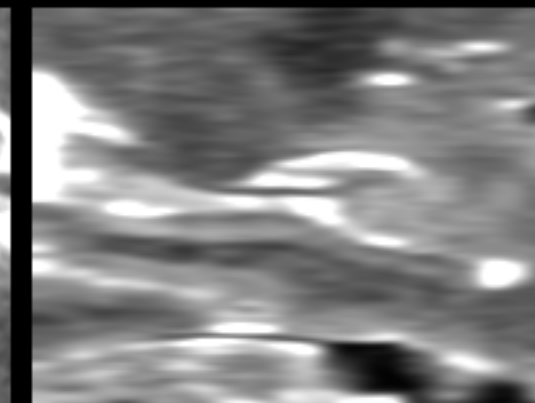

hippunfoldT1

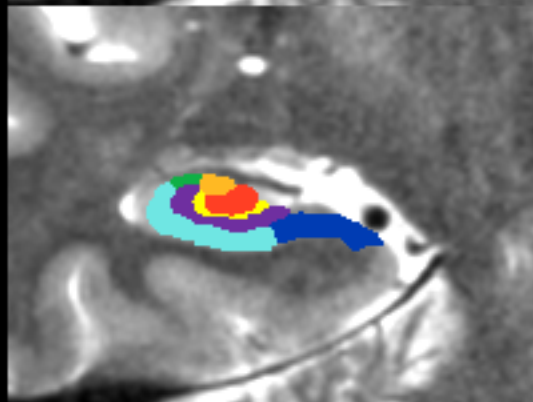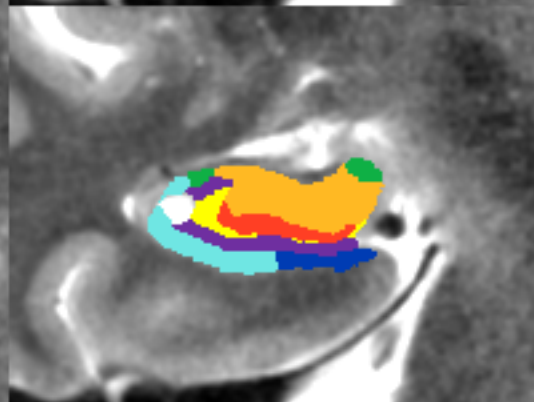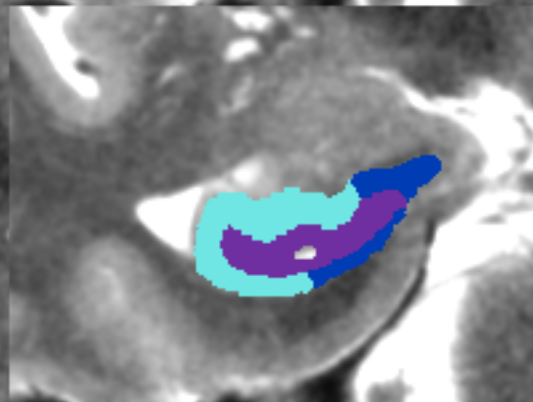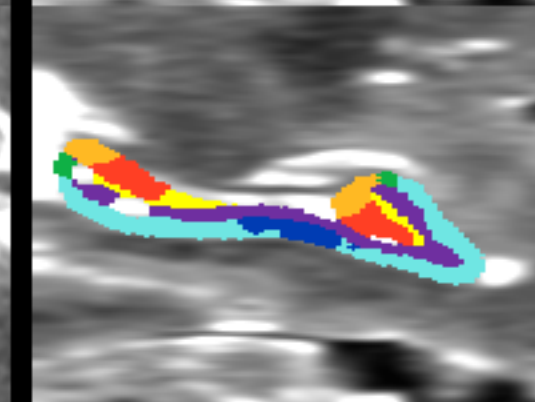

ashs

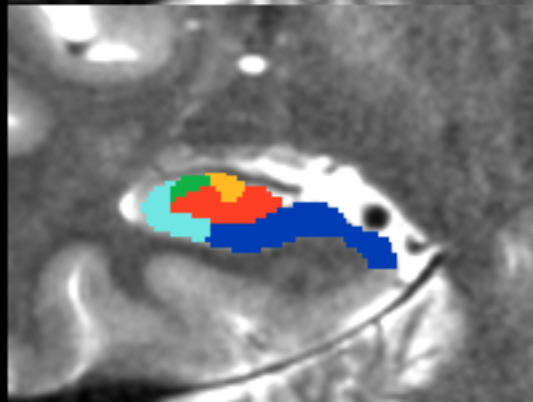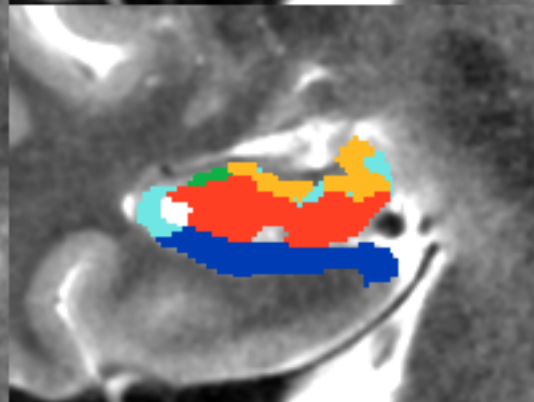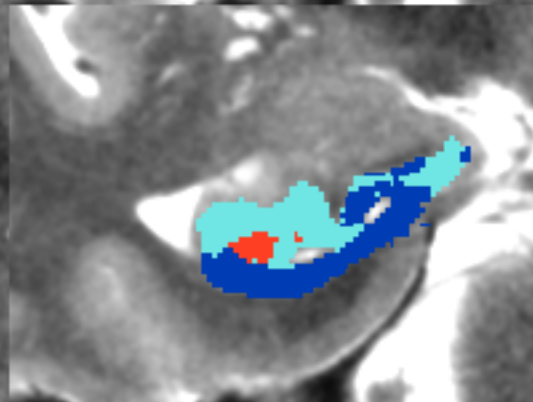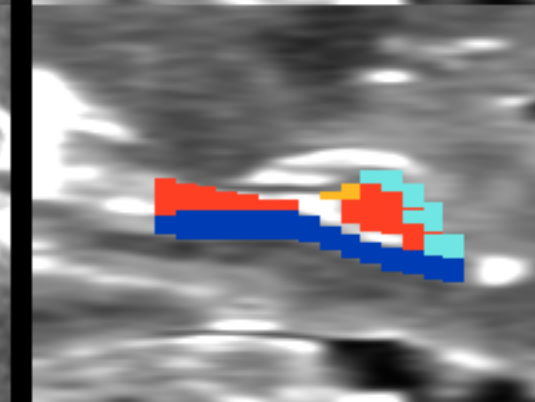

freesurfer

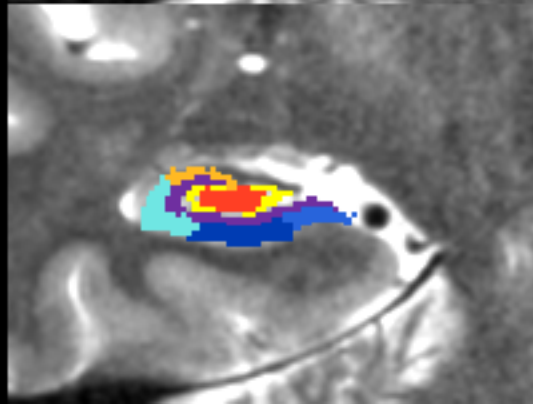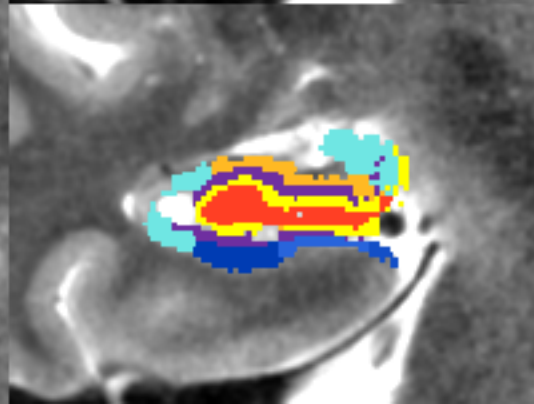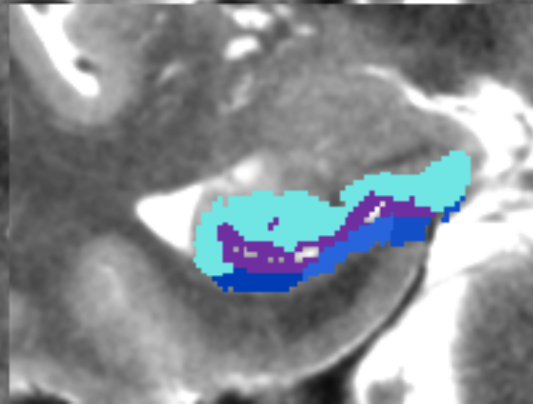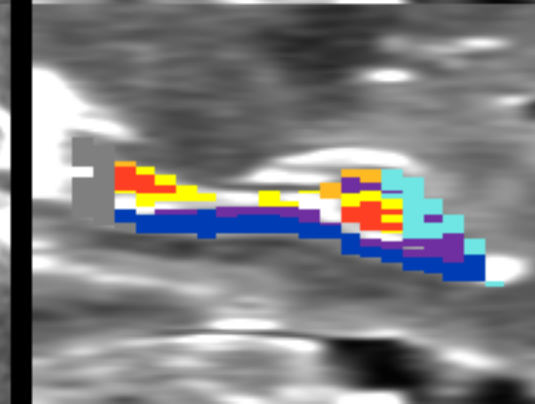

hemi=R,subject=6954998

MRI

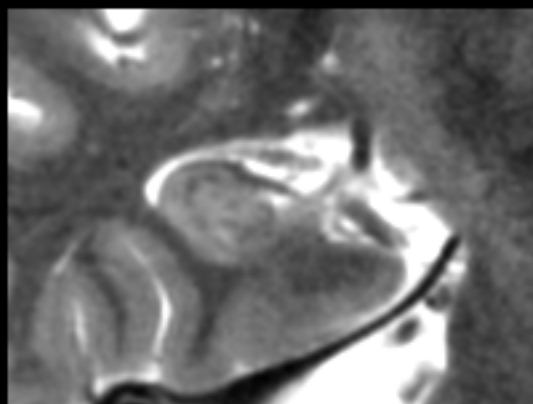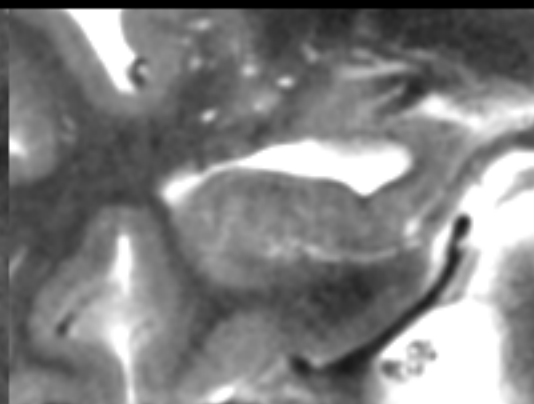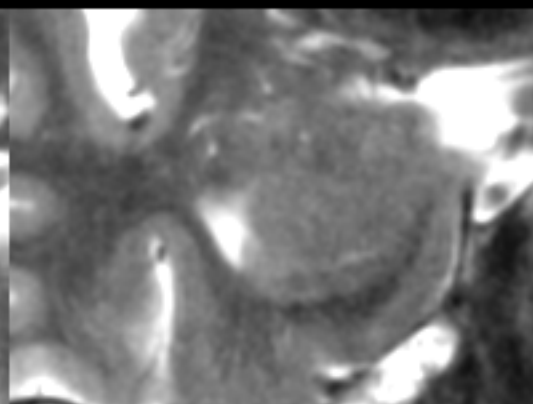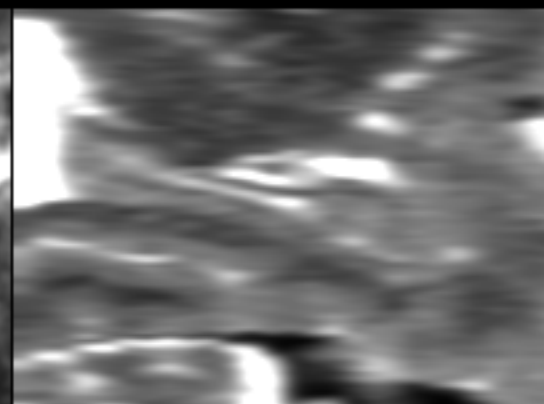

hippunfoldT1

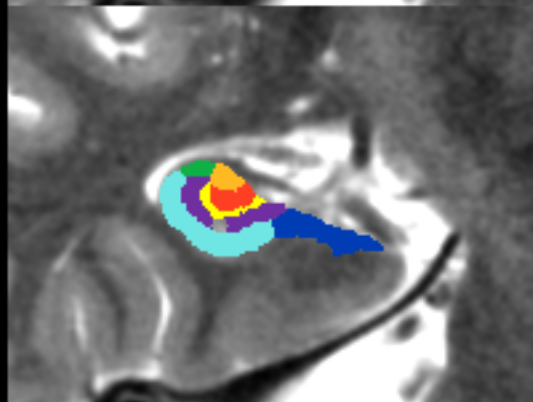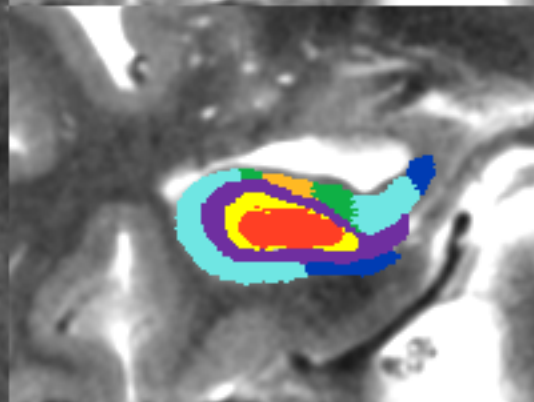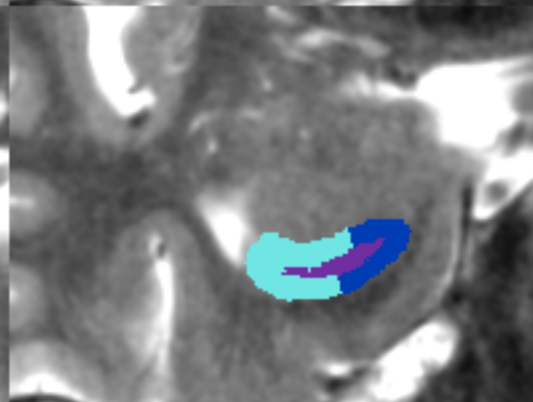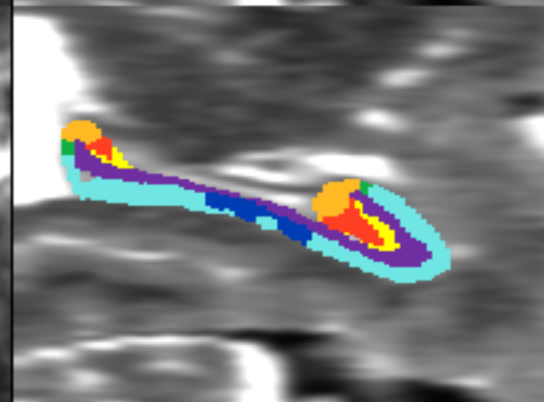

ashs

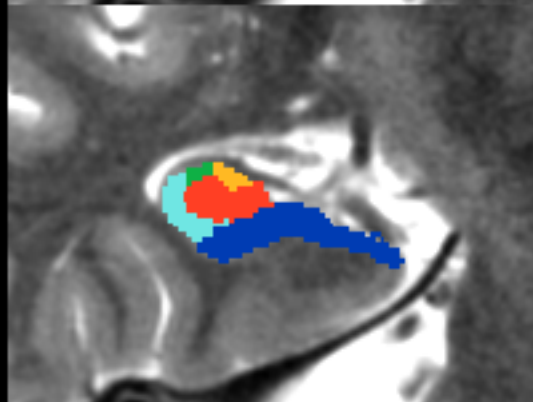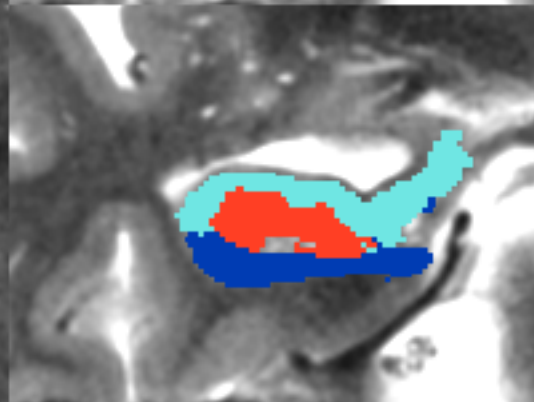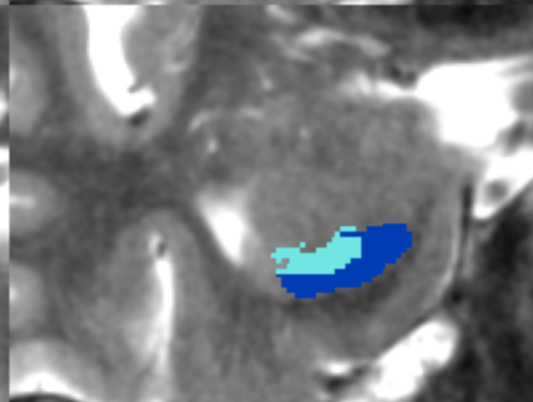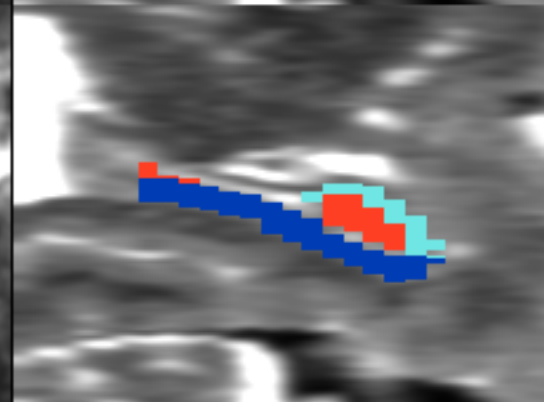

freesurfer

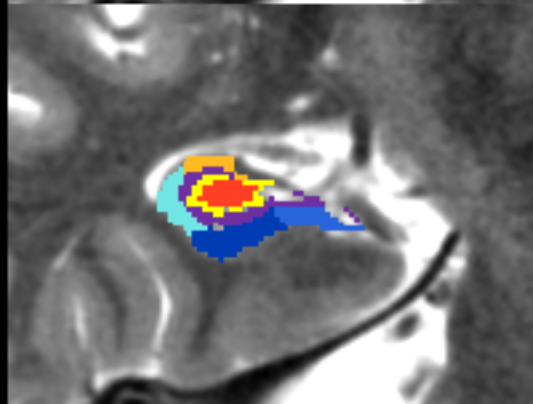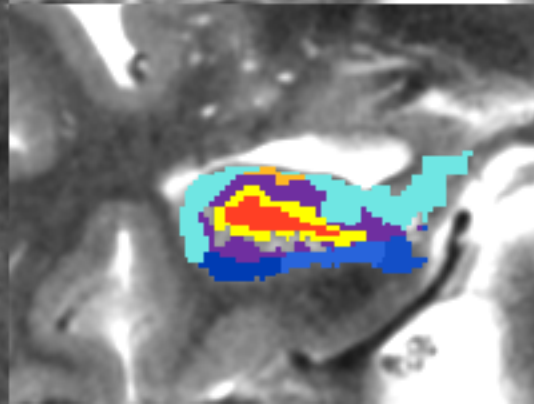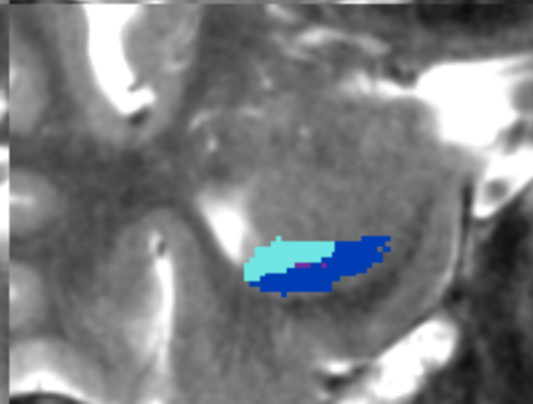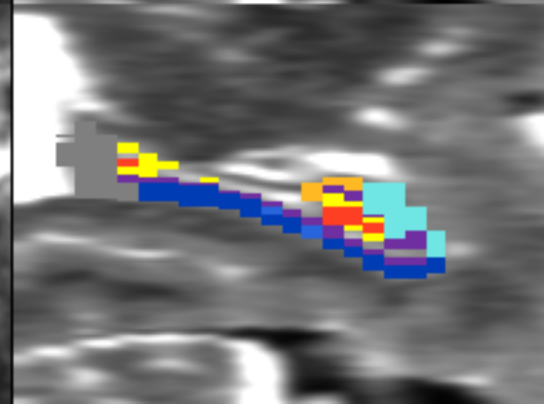

hemi=R,subject=7027863

MRI

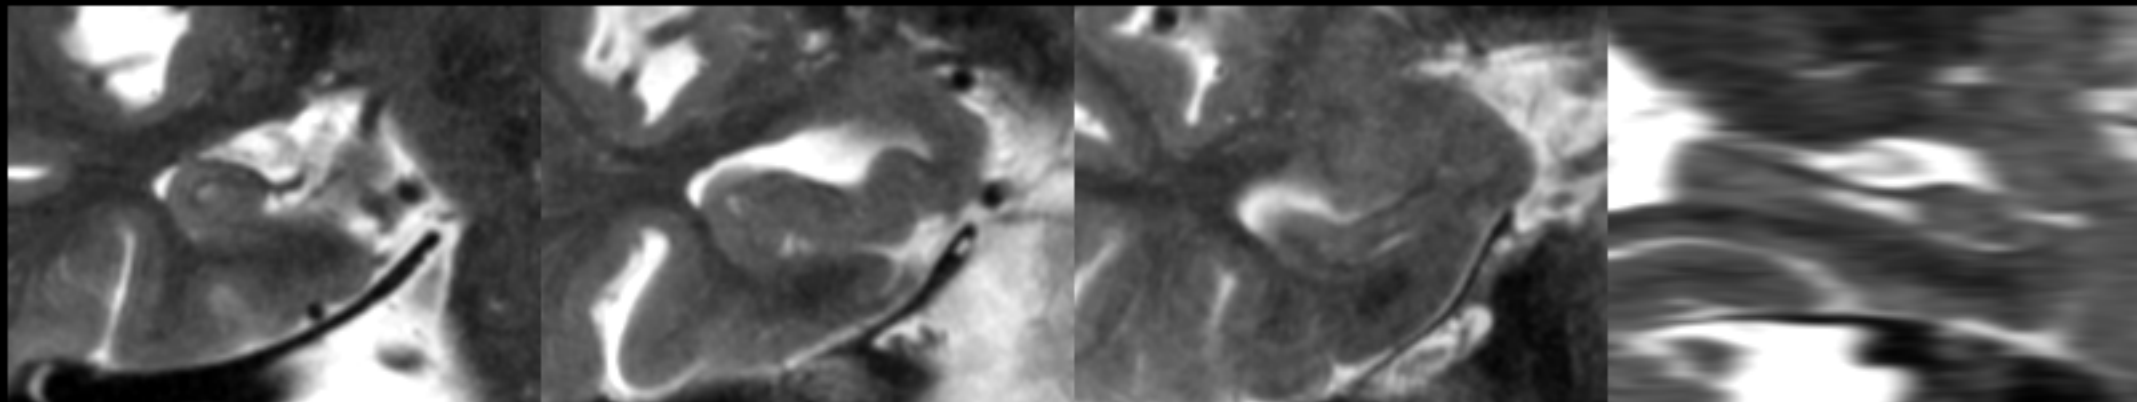

hippunfoldT1

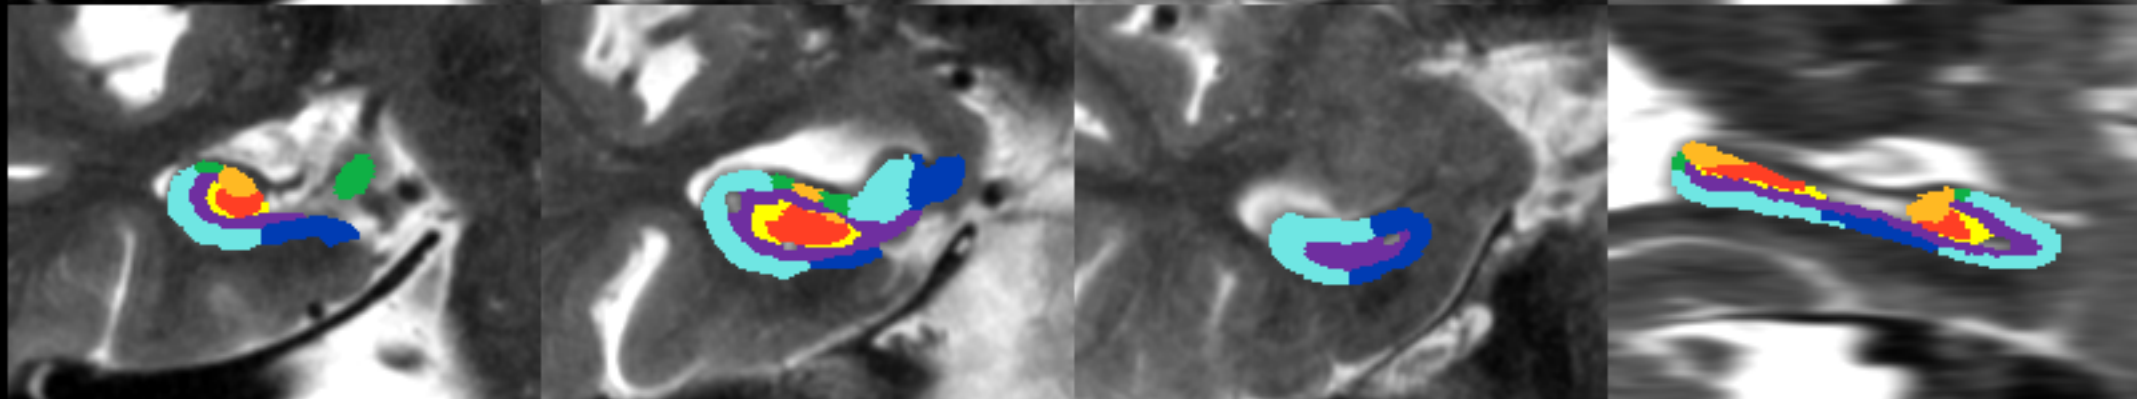

ashs

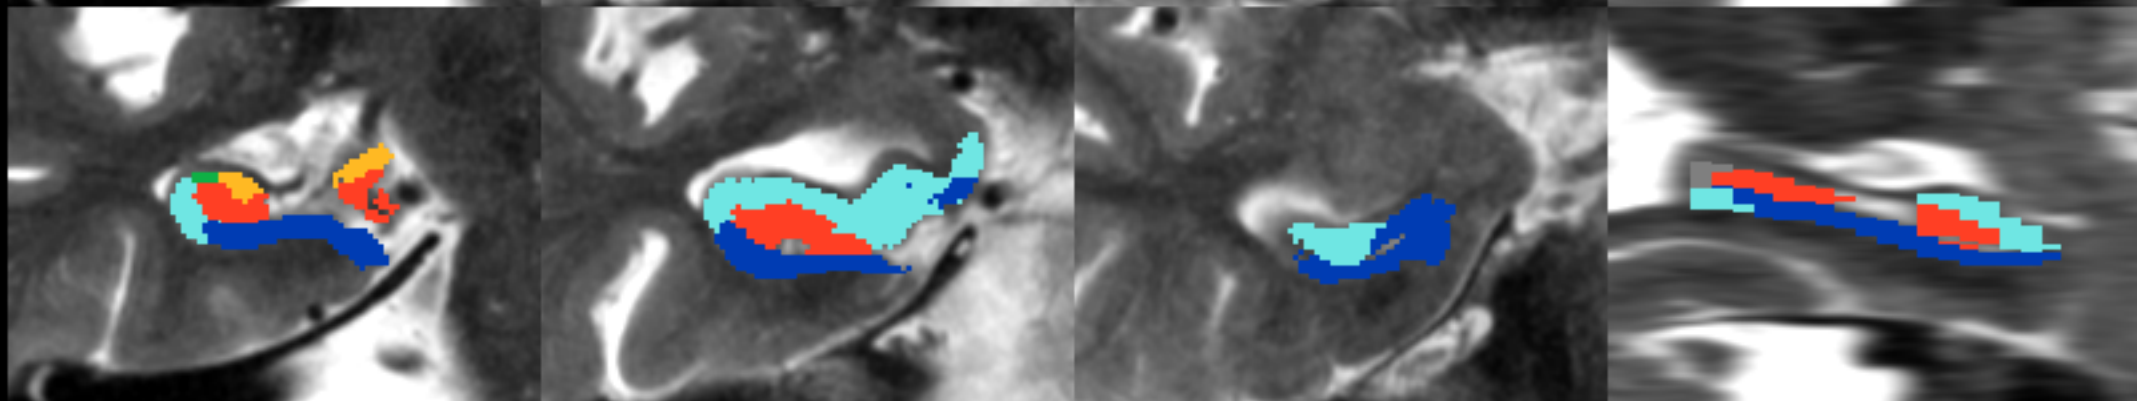

freesurfer

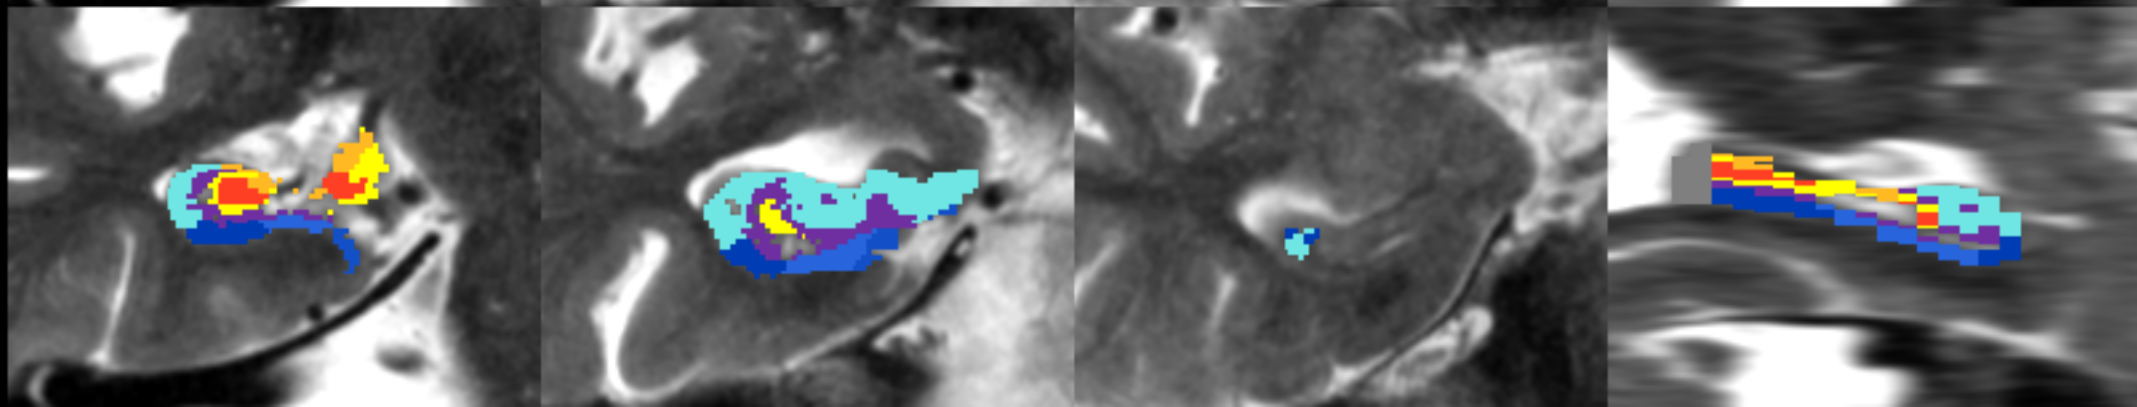

hemi=R,subject=7079074

MRI

hippunfoldT1

ashs

freesurfer

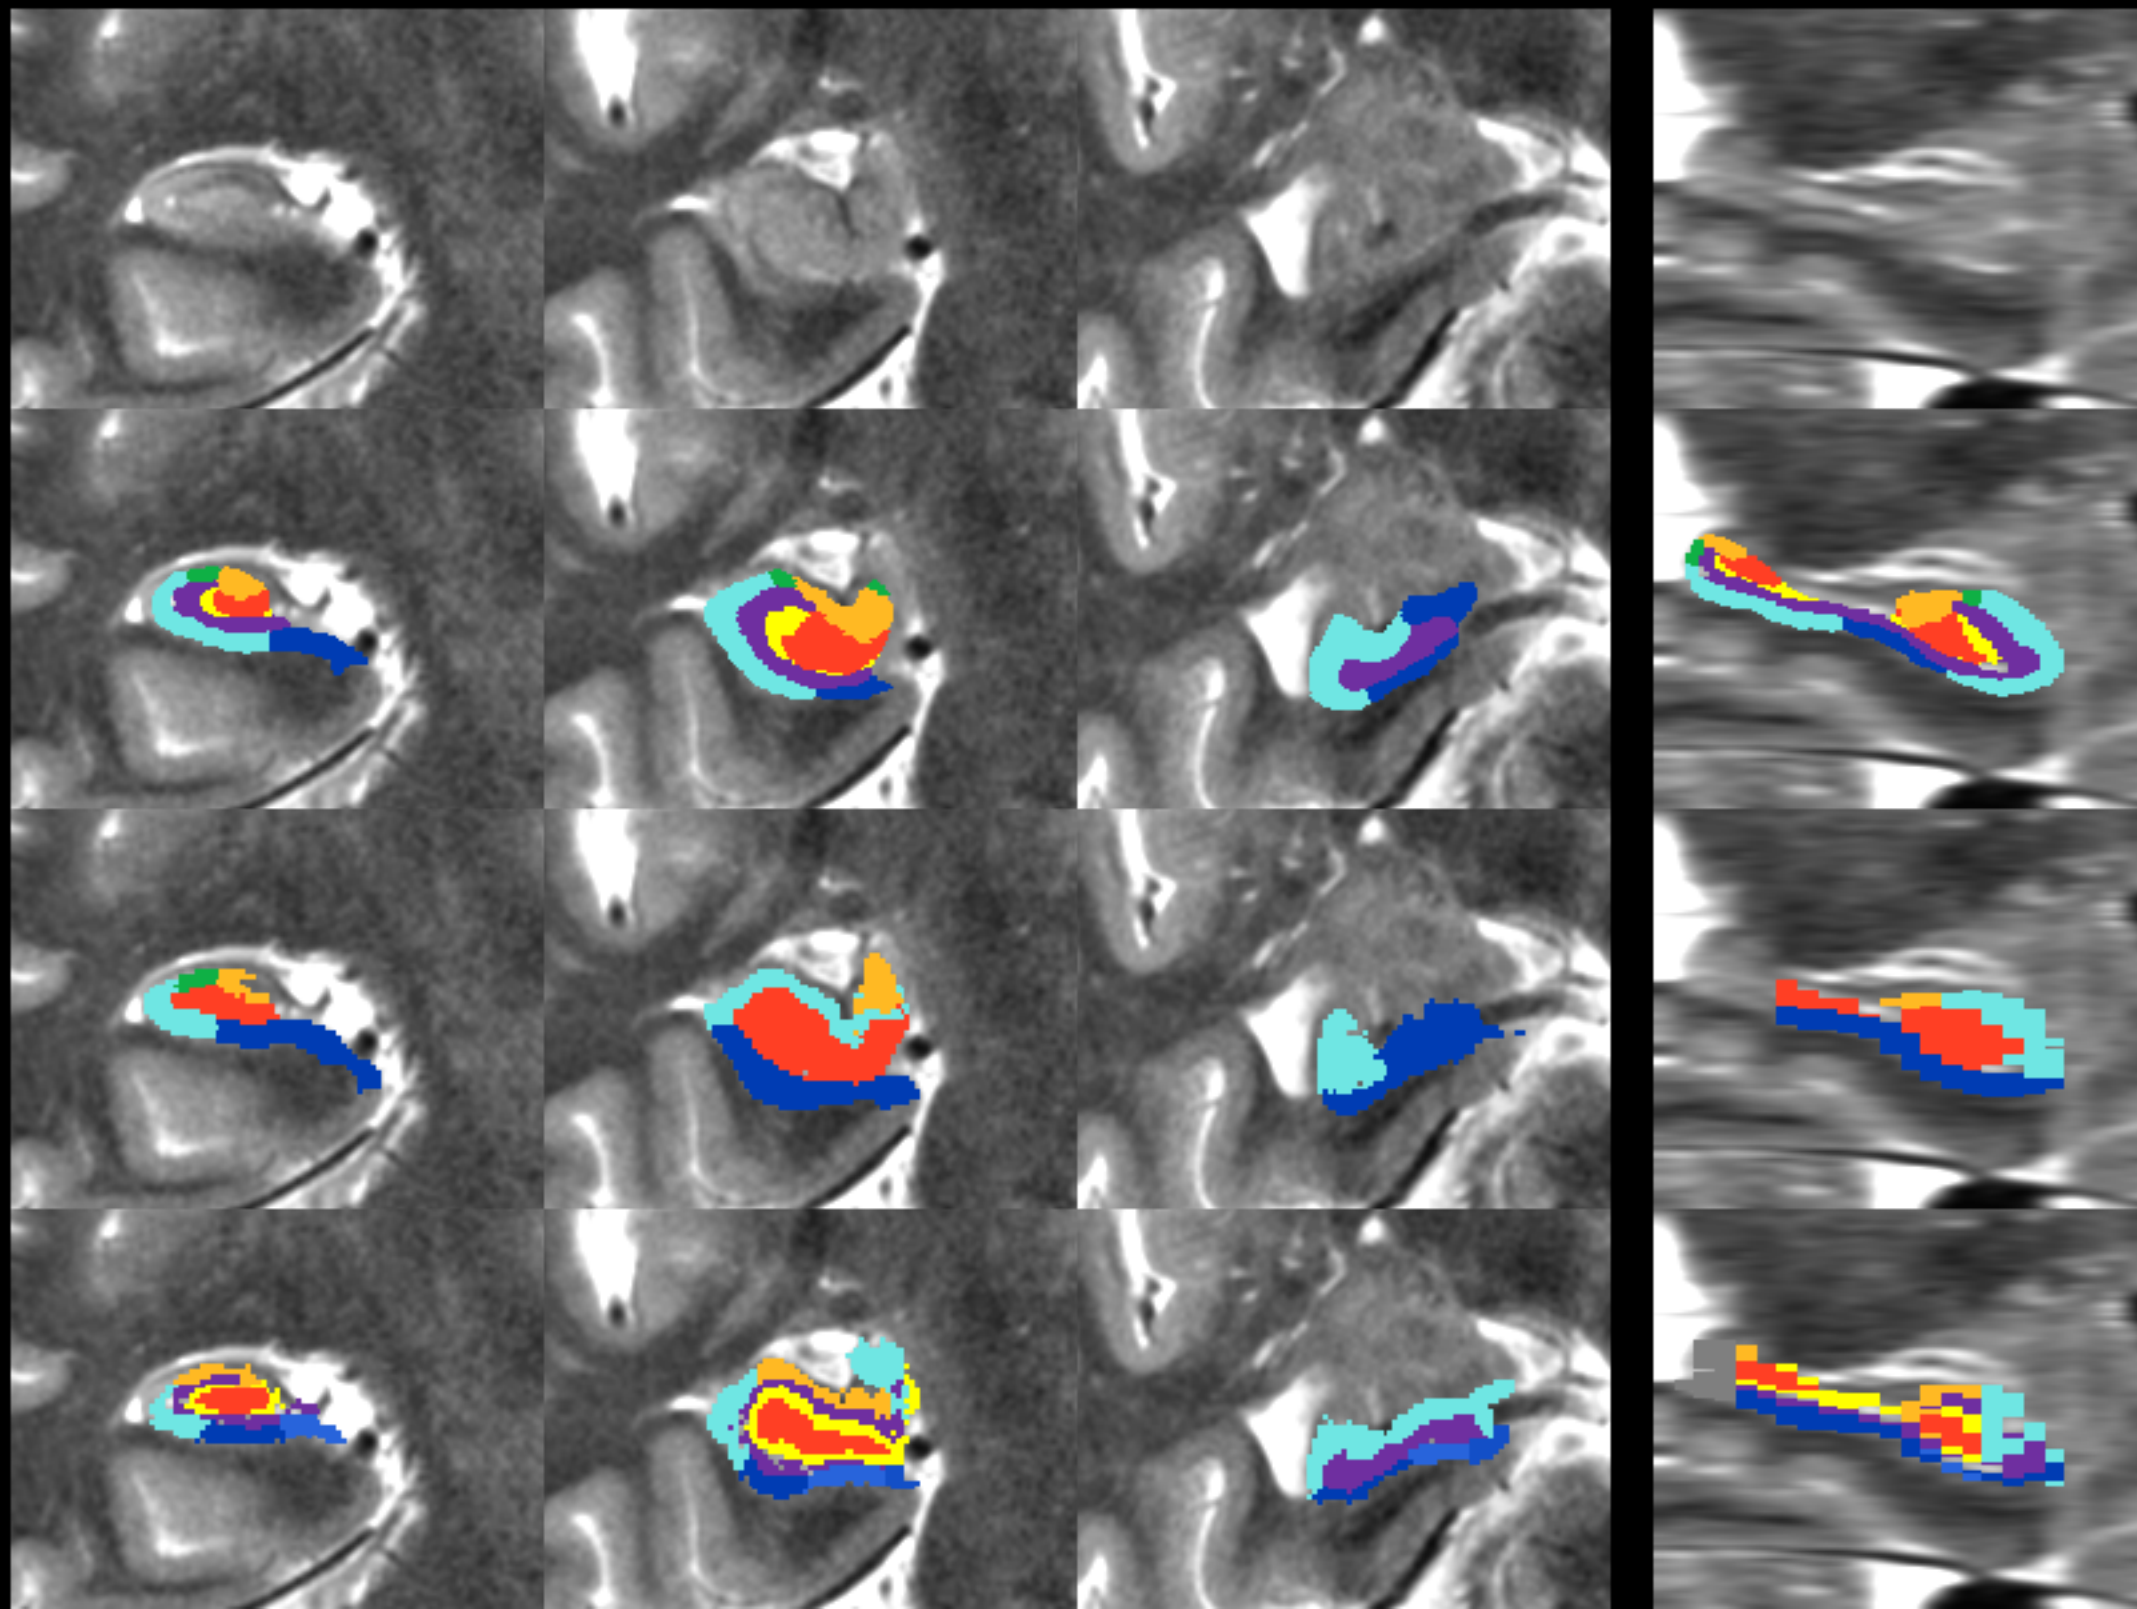

hemi=R,subject=7101546

MRI

hippunfoldT1

ashs

freesurfer

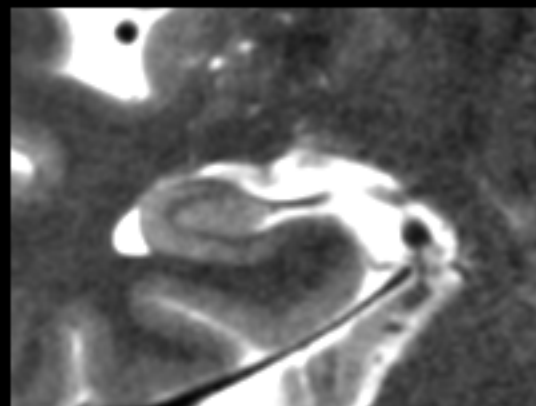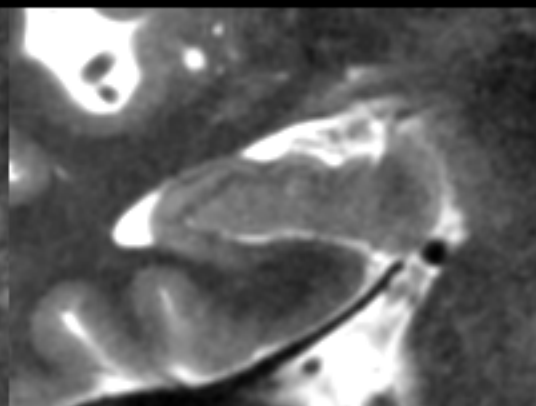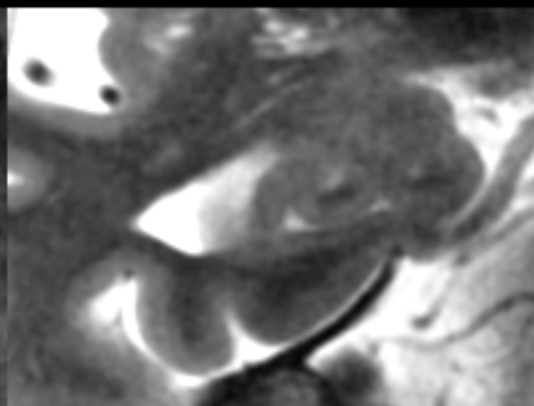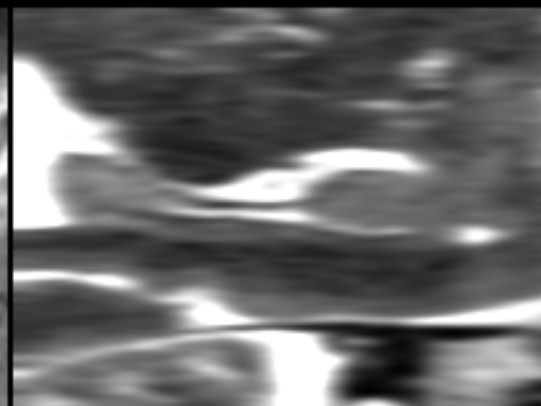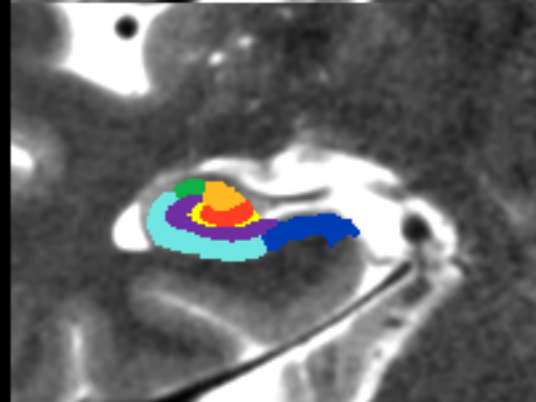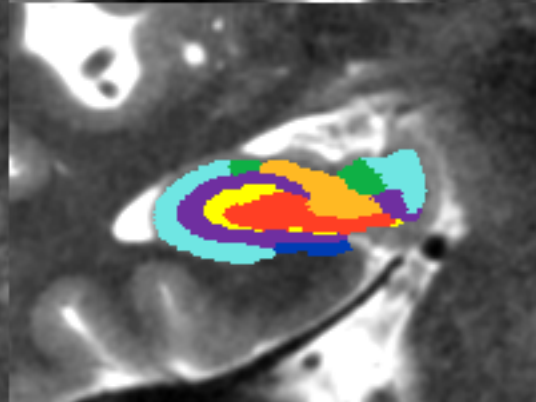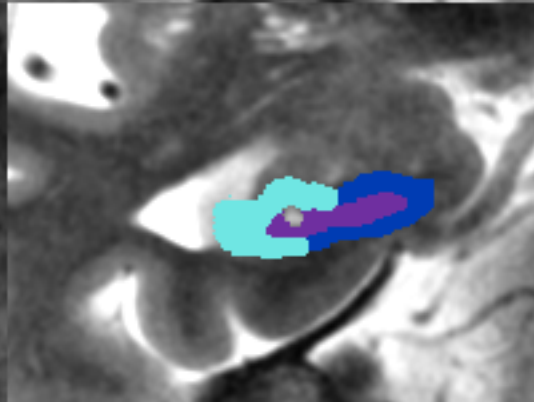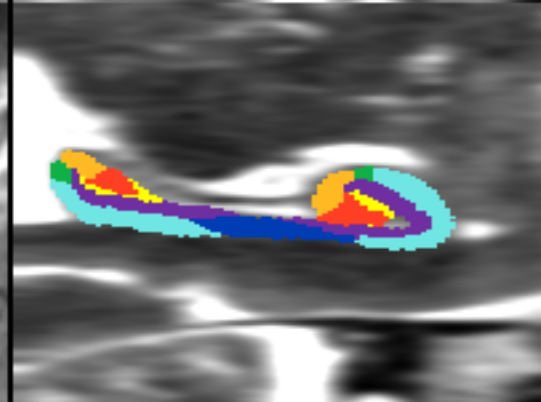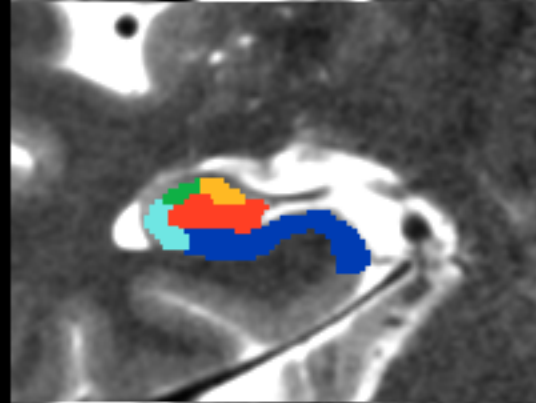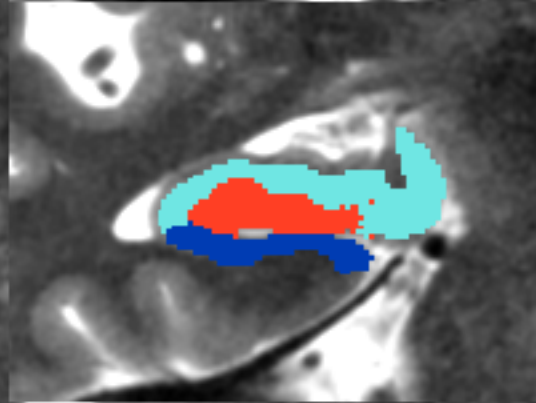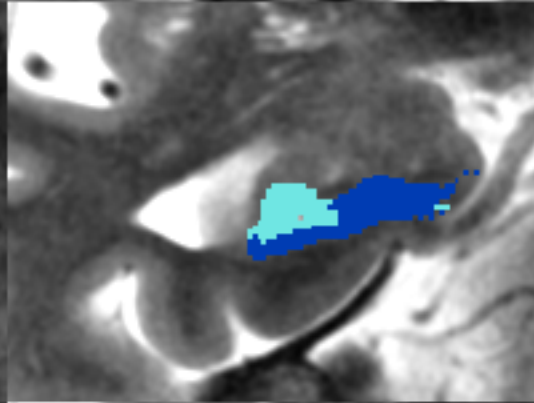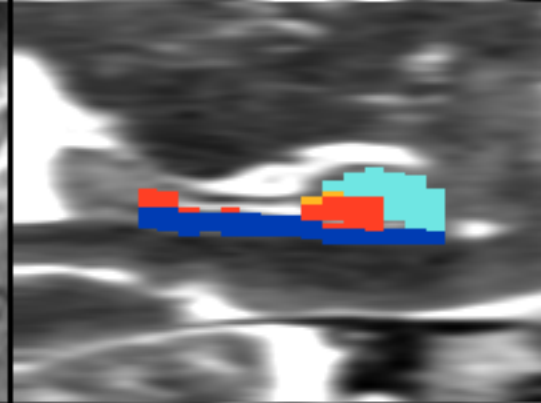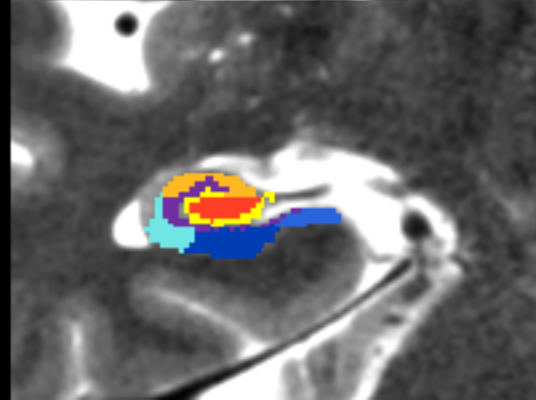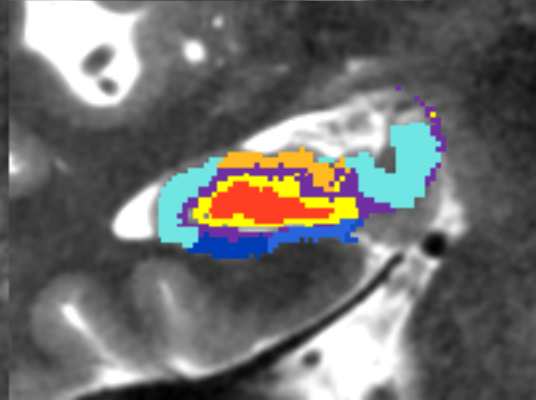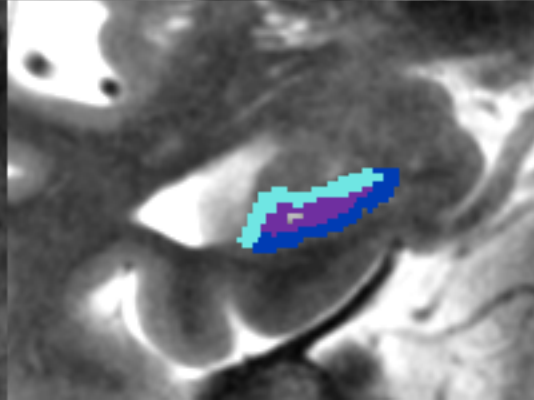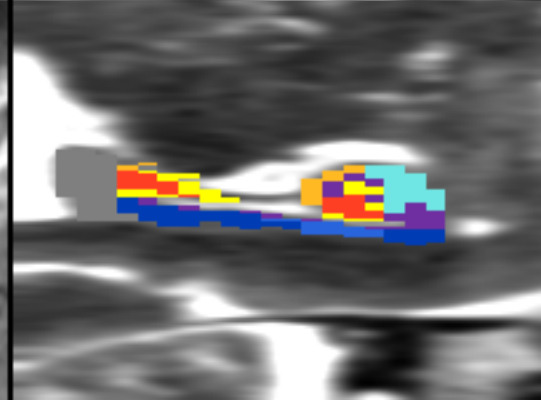

hemi=R,subject=7108358

MRI

hippunfoldT1

ashes

freesurfer

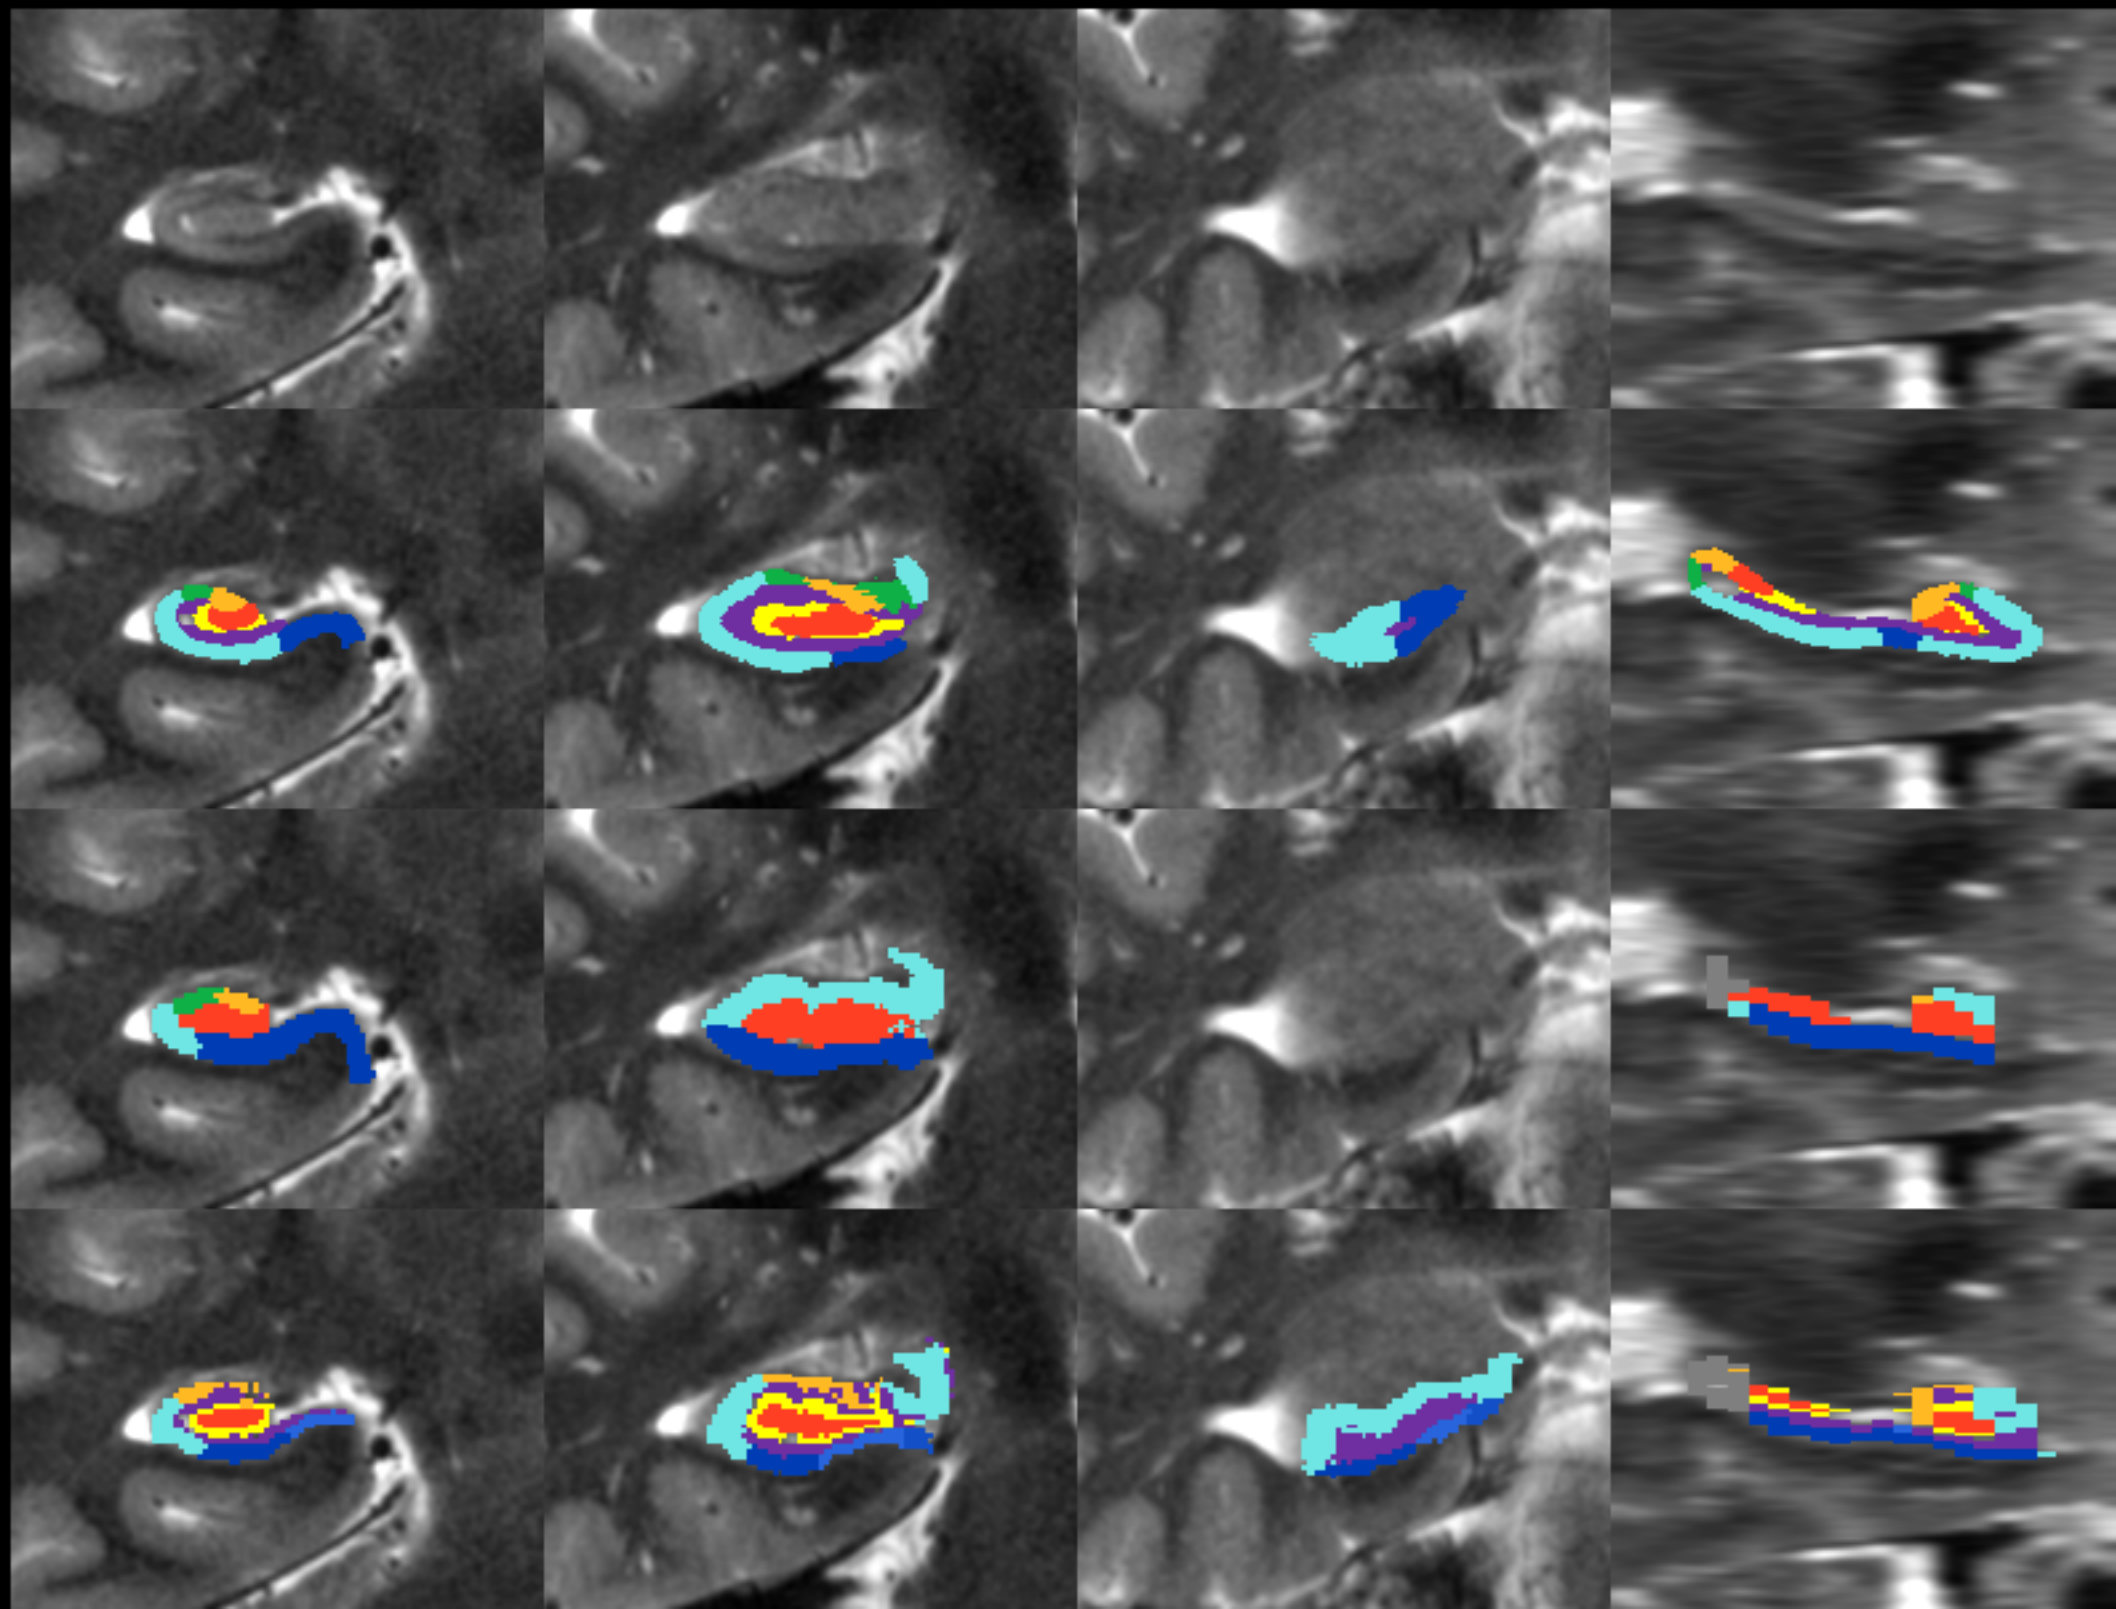



hemi=R,subject=7130957

MRI

hippunfoldT1

ashs

freesurfer

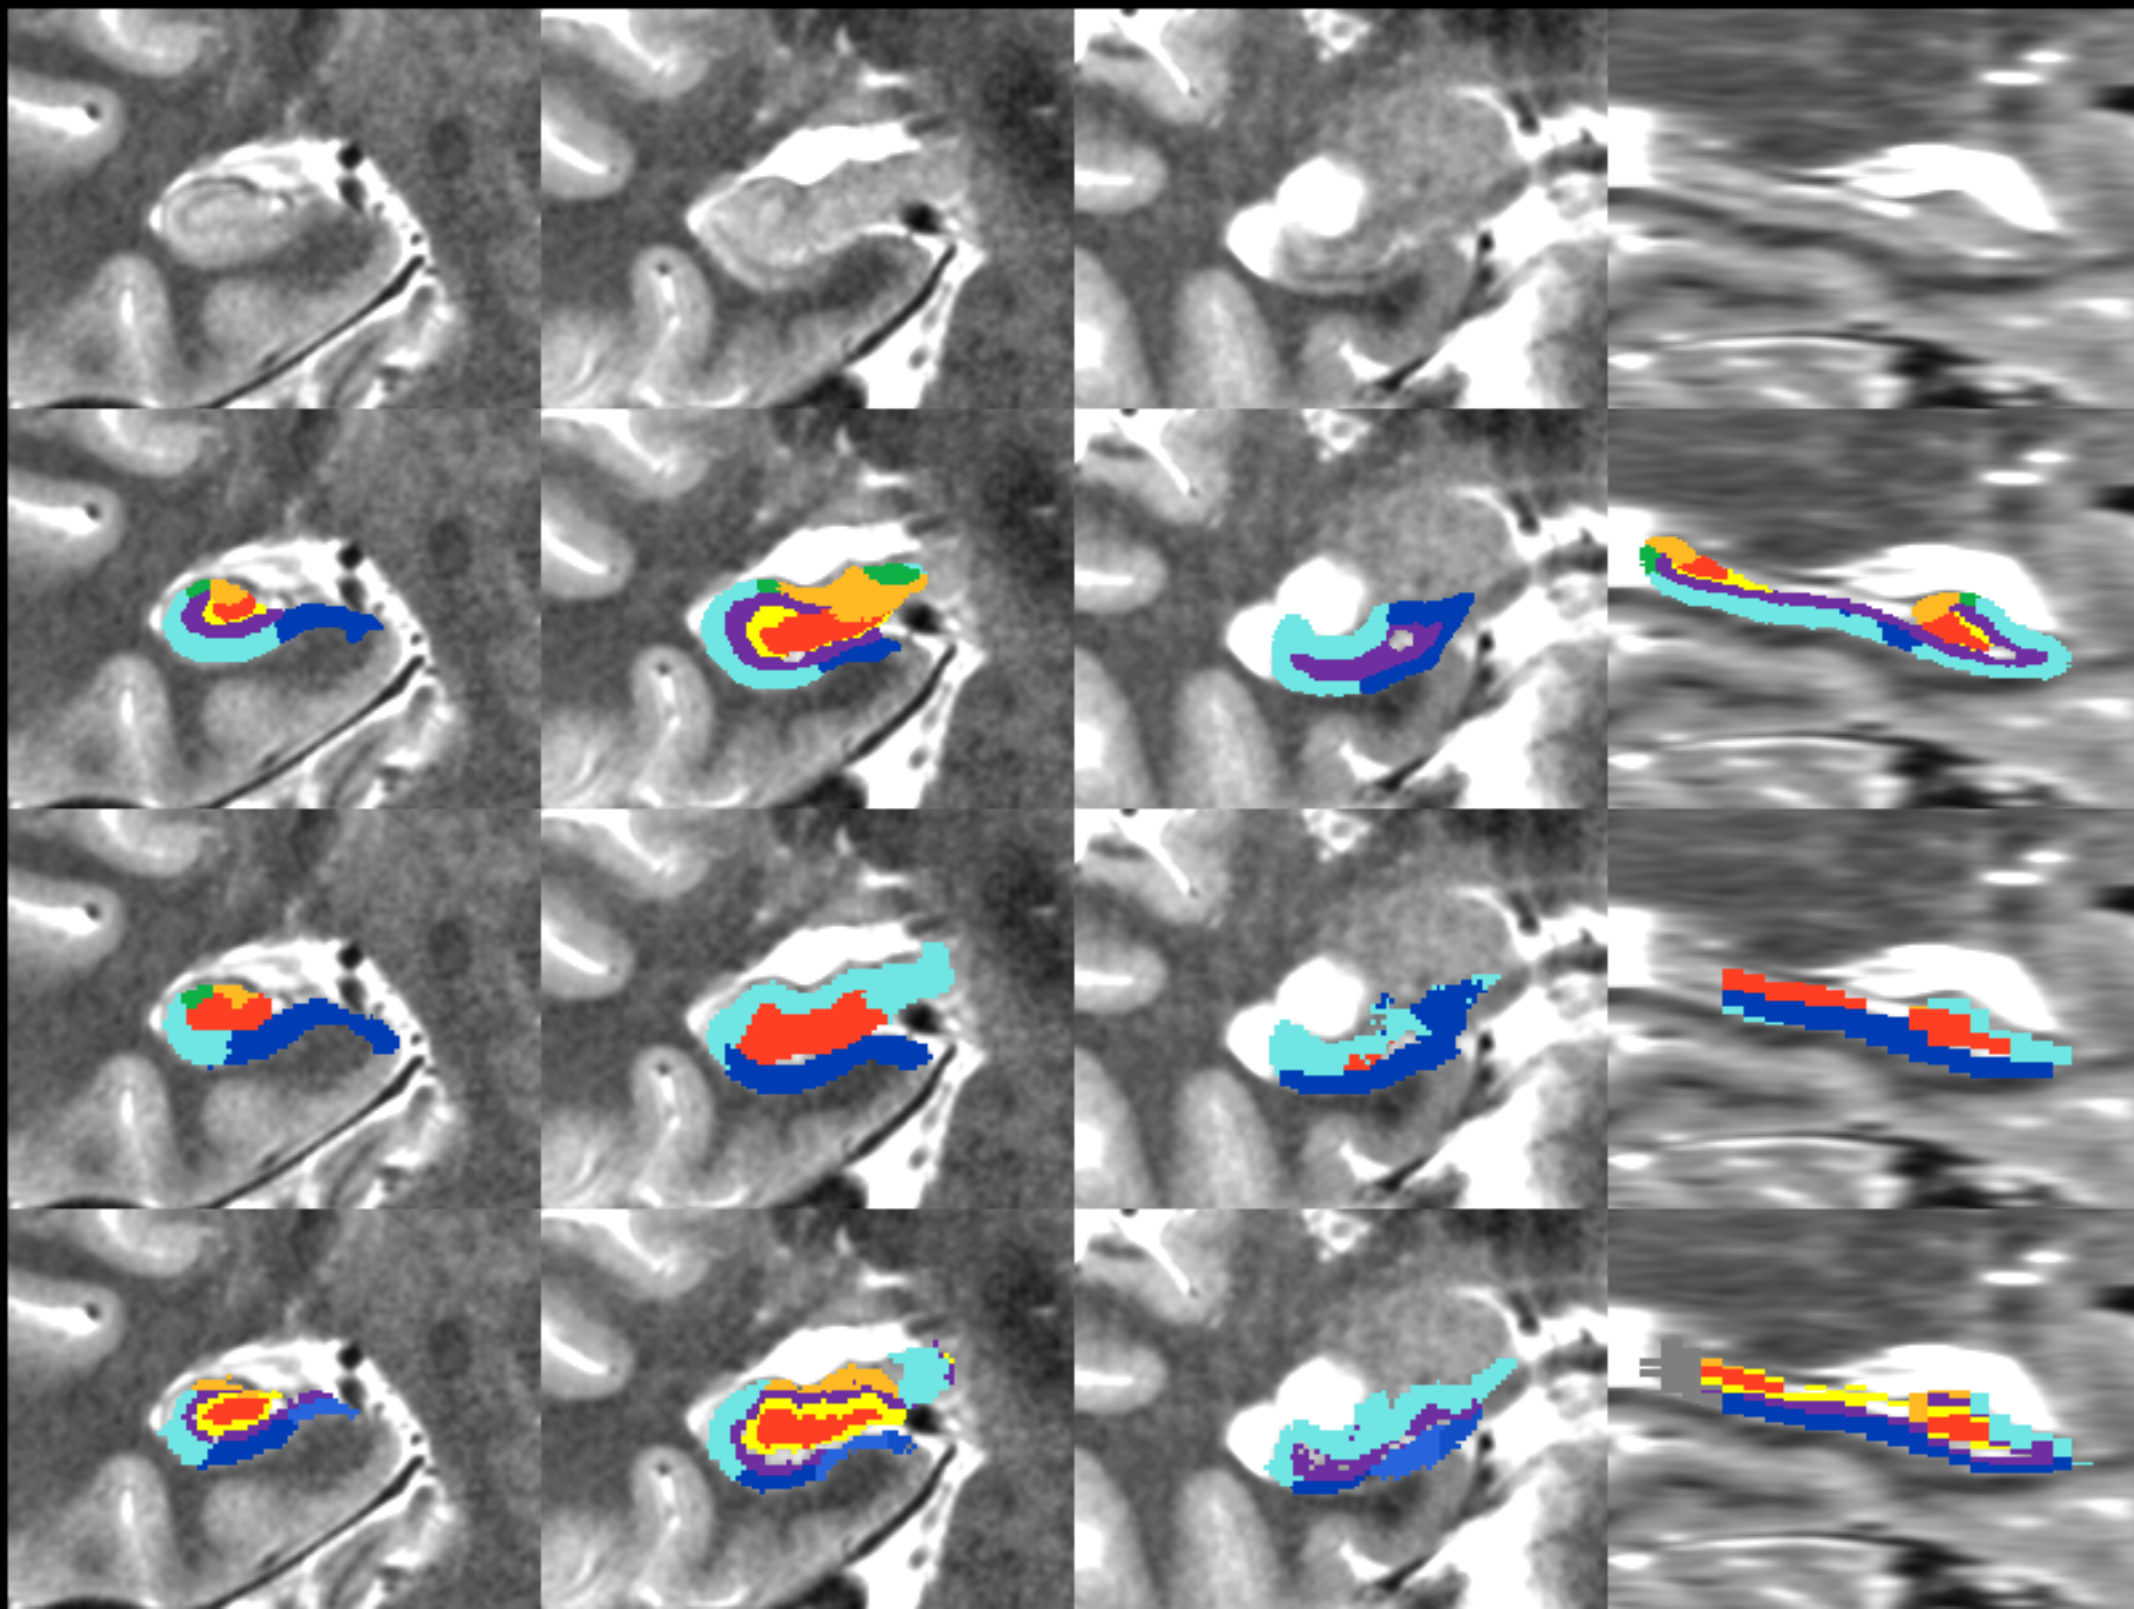

hemi=R,subject=7131454

MRI

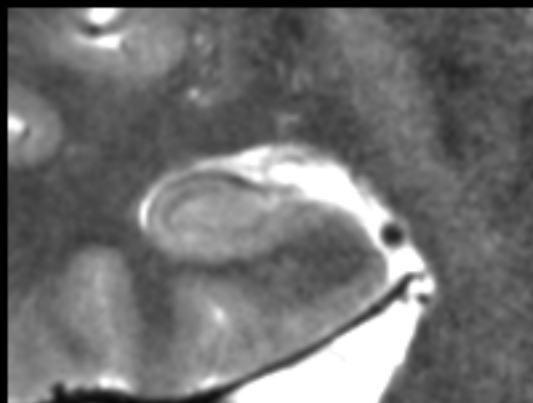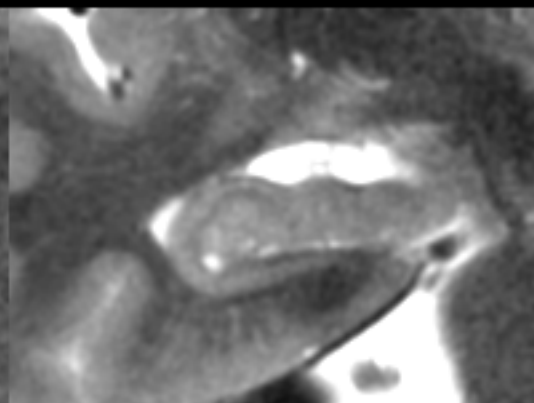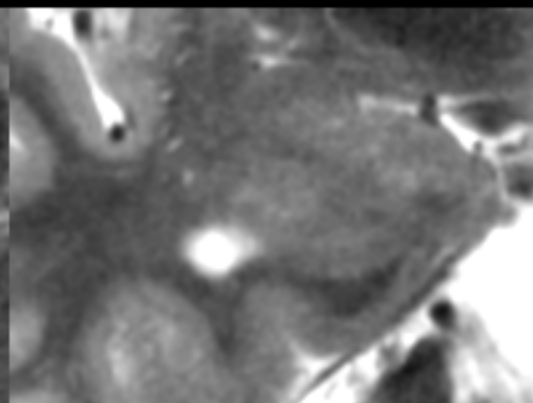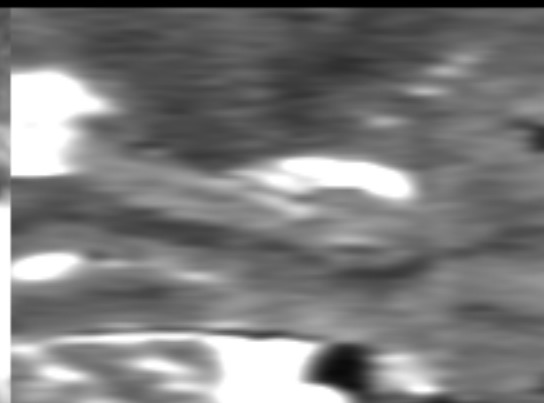

hippunfoldT1

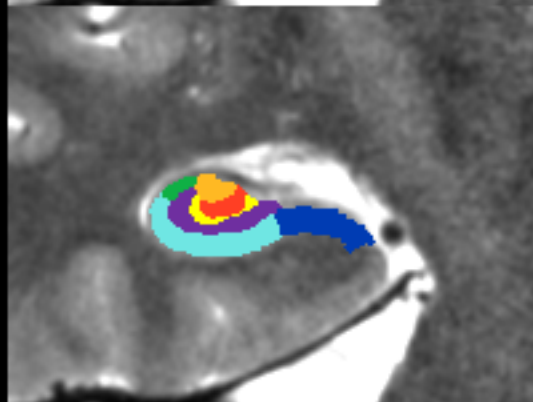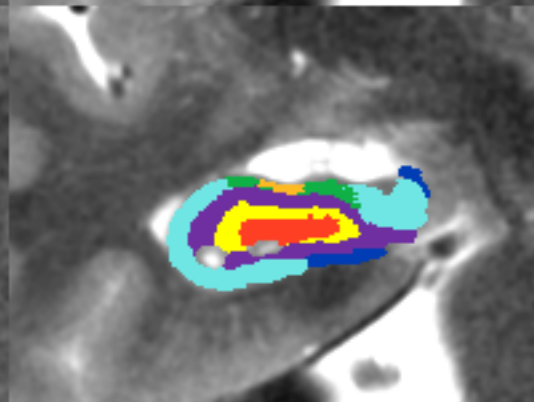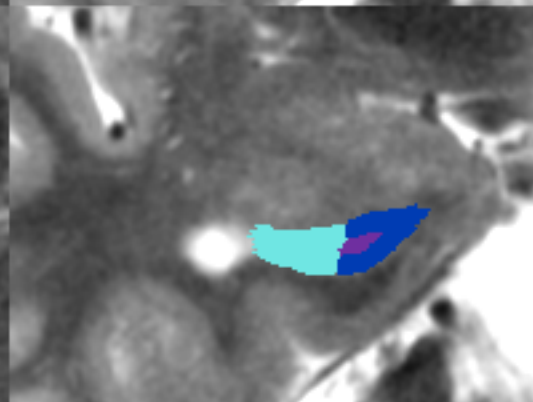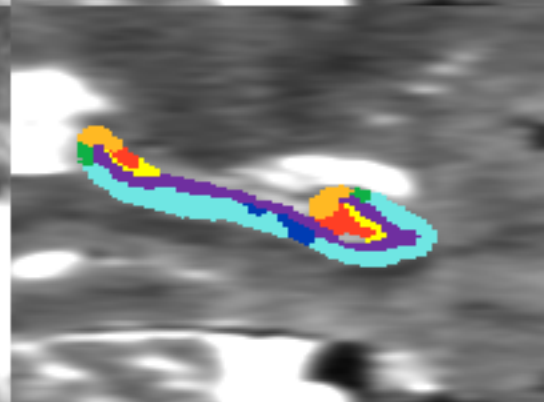

ashs

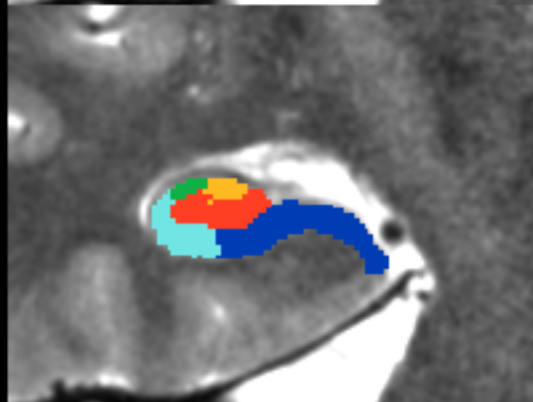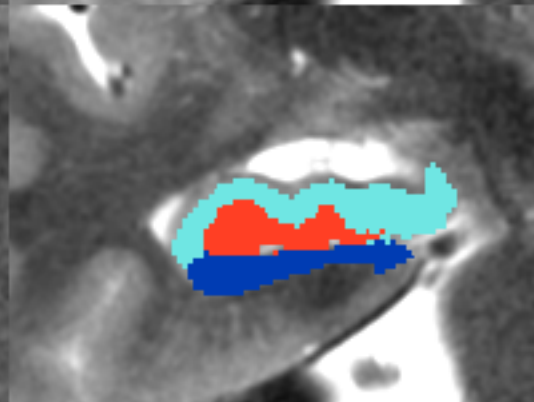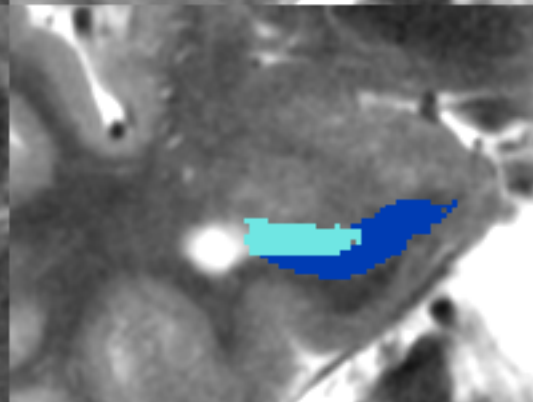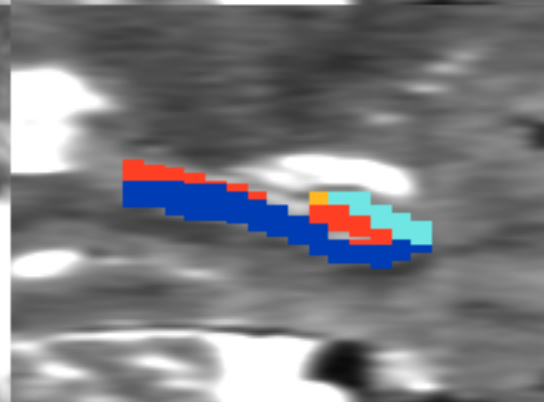

freesurfer

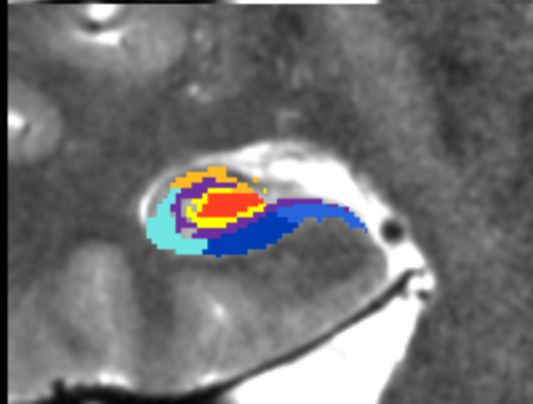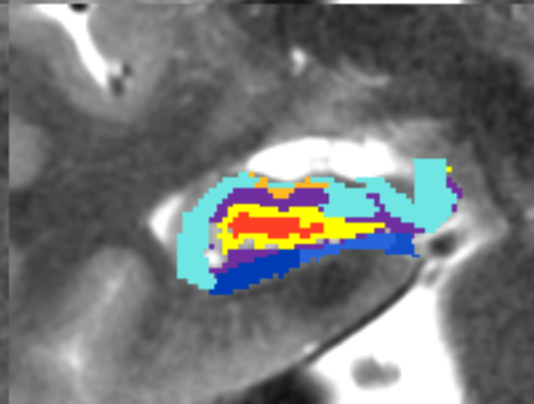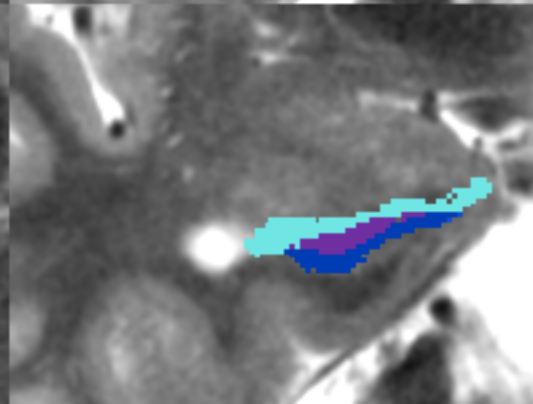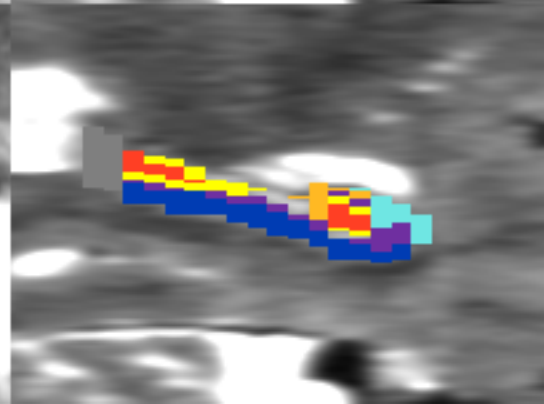

hemi=R,subject=7134056

MRI

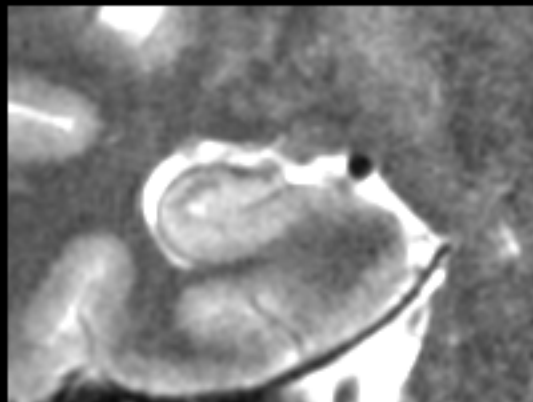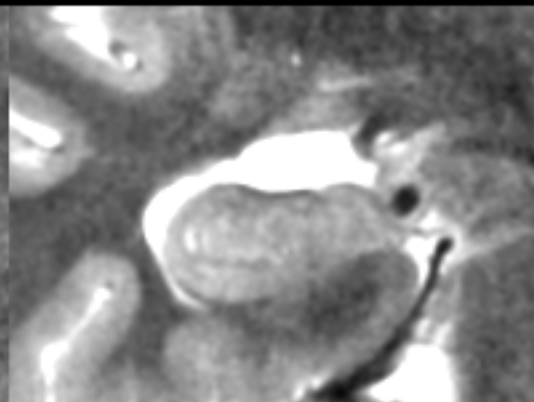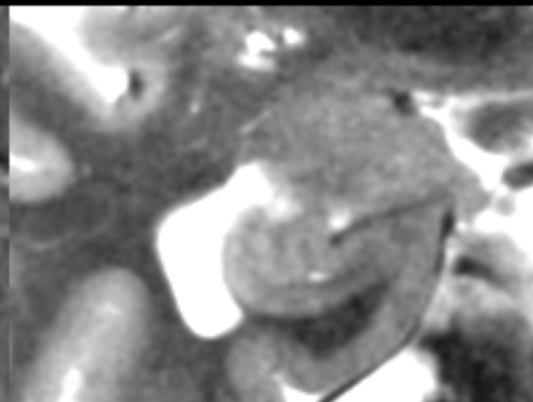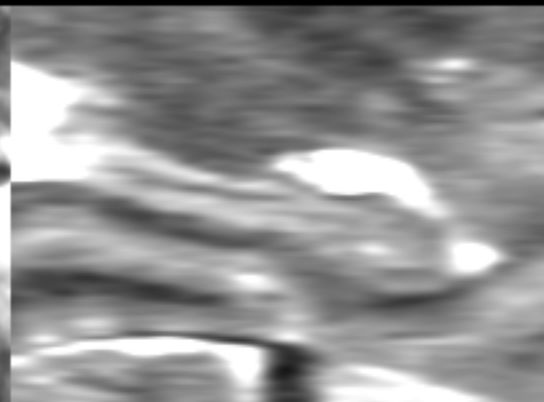

hippunfoldT1

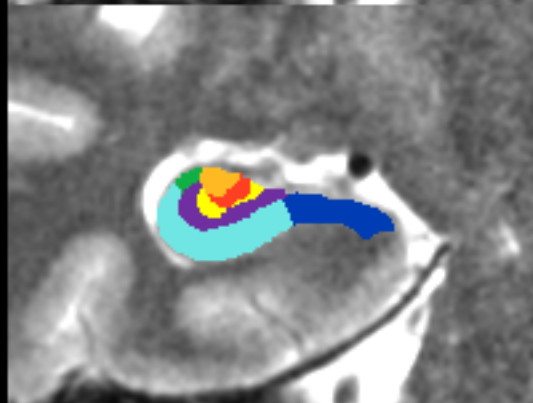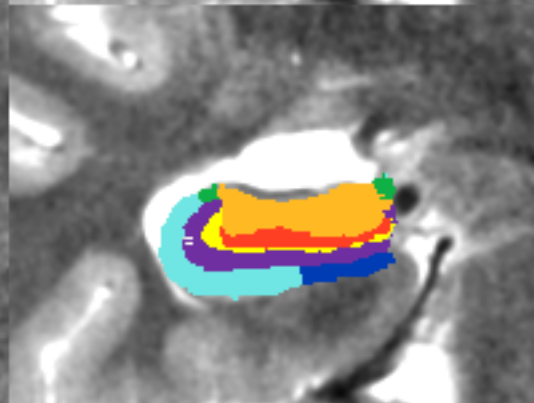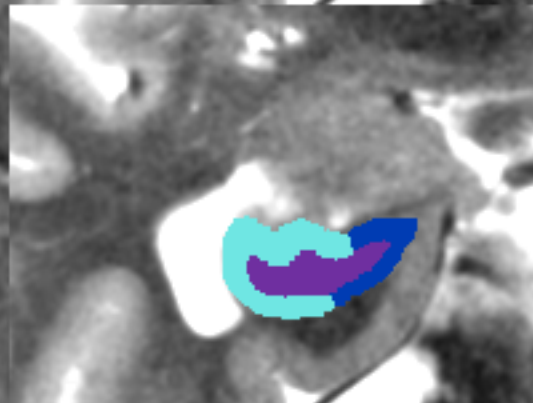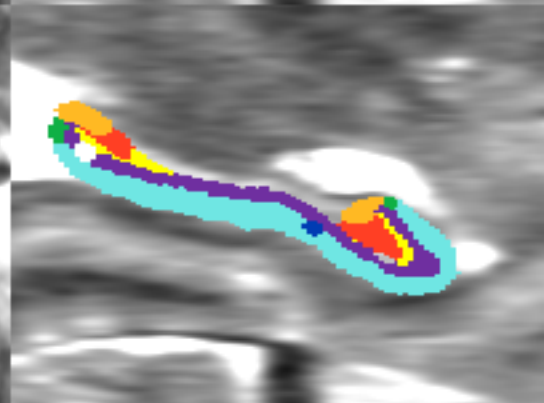

ashs

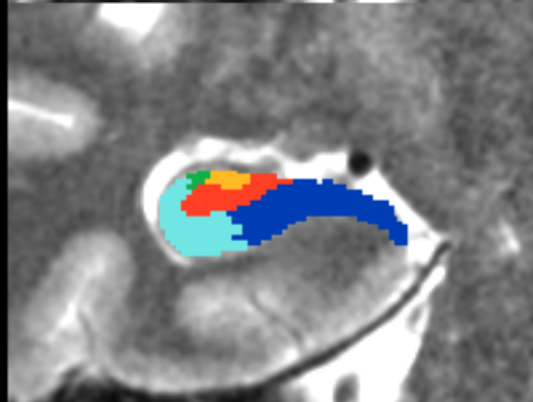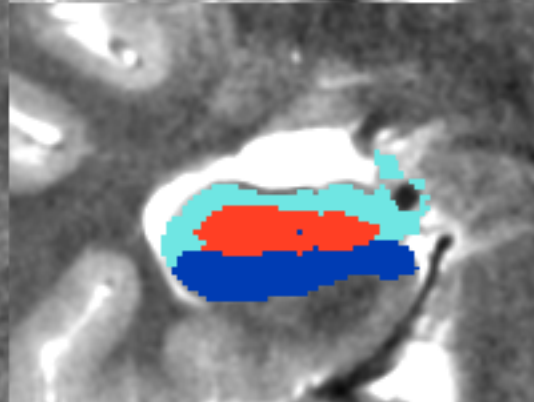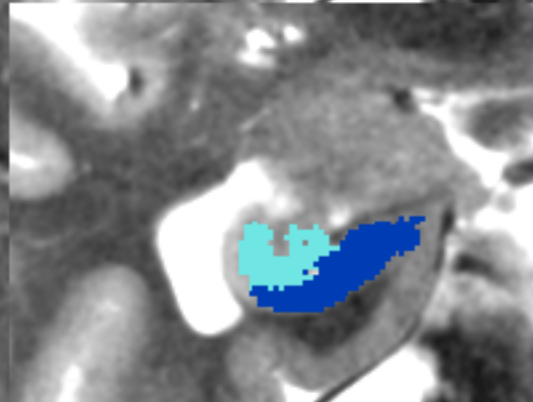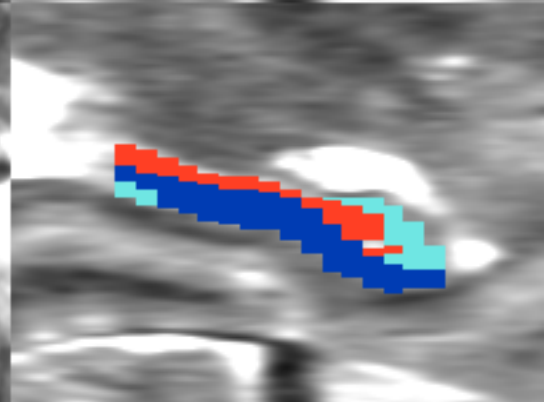

freesurfer

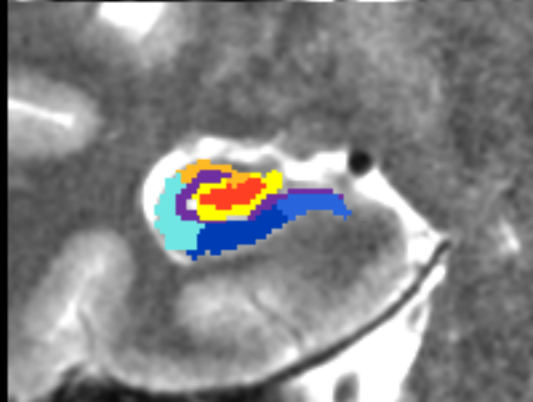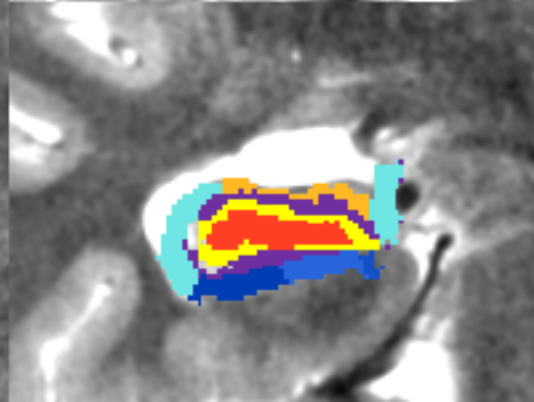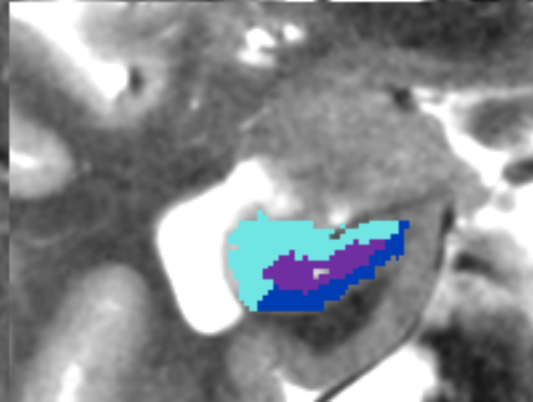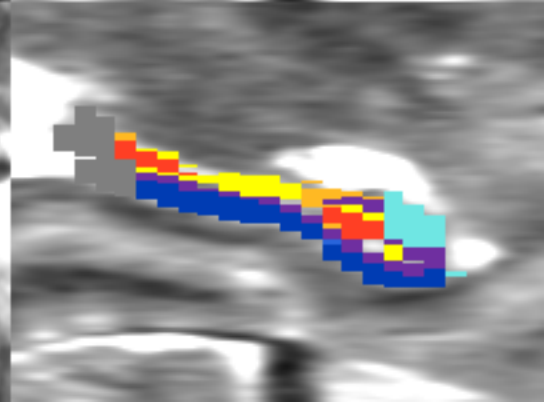

hemi=R,subject=7137567

MRI

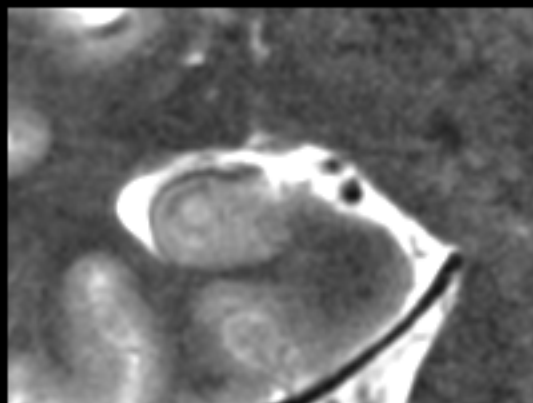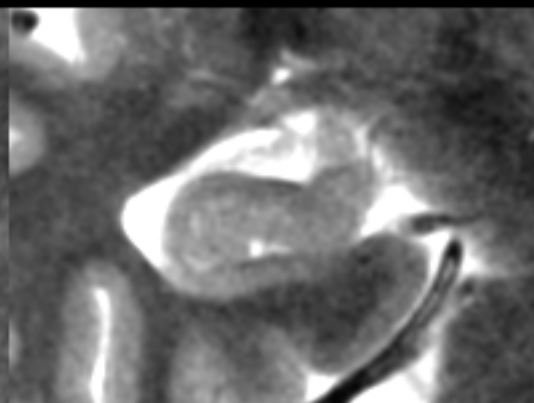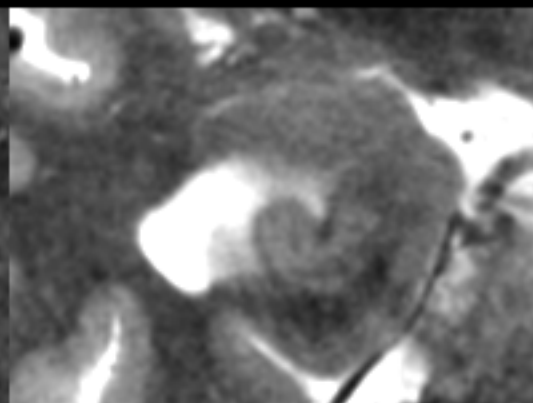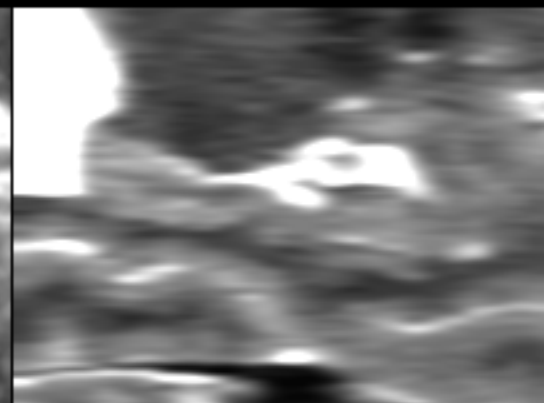

hippunfoldT1

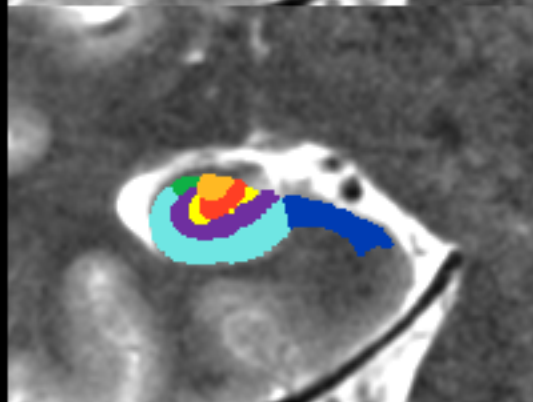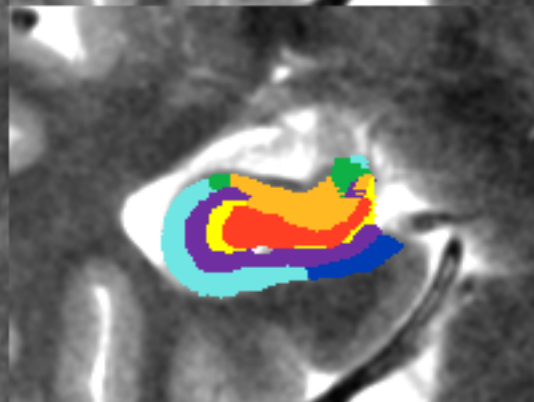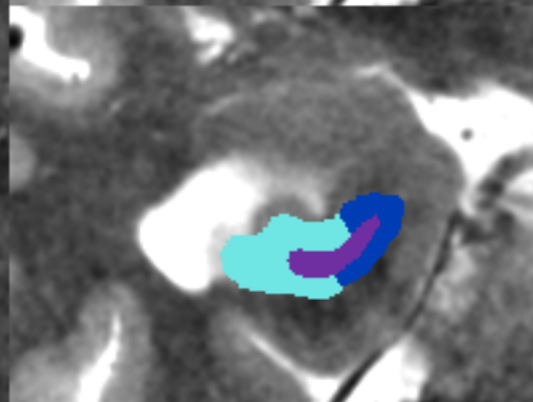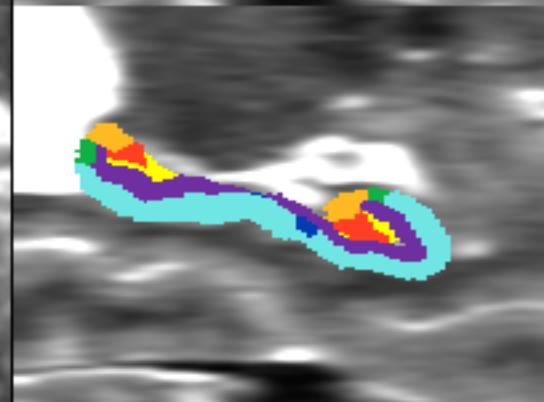

ashs

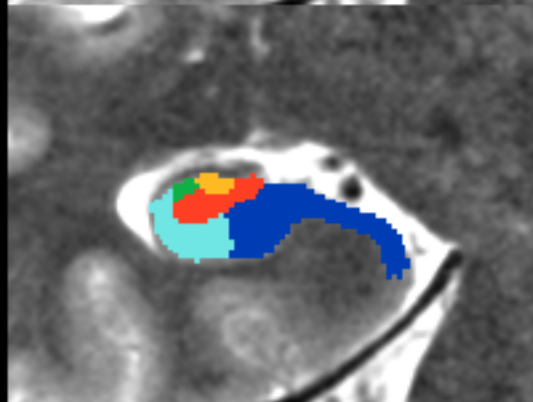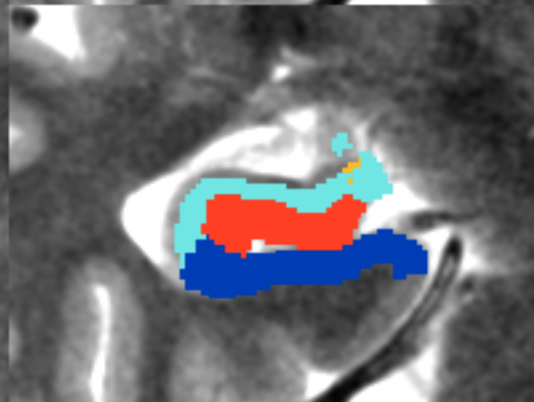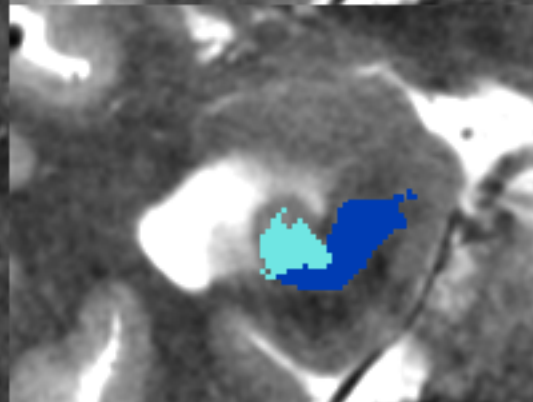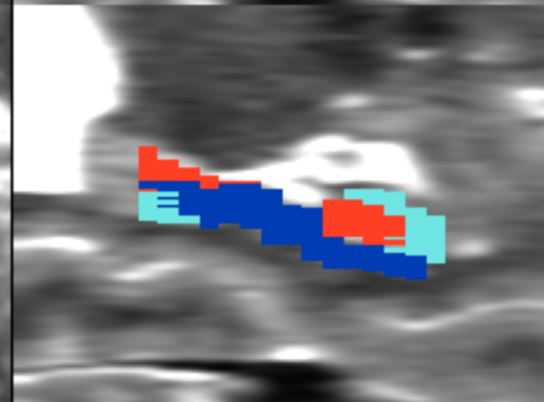

freesurfer

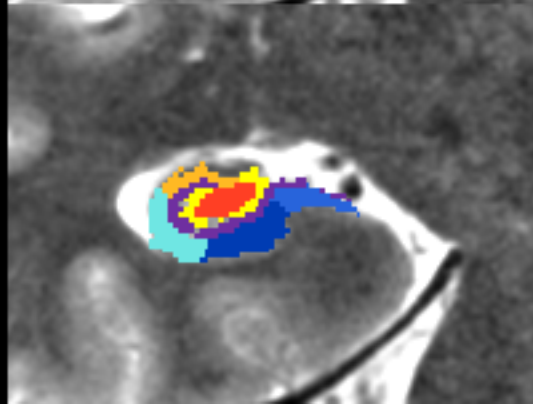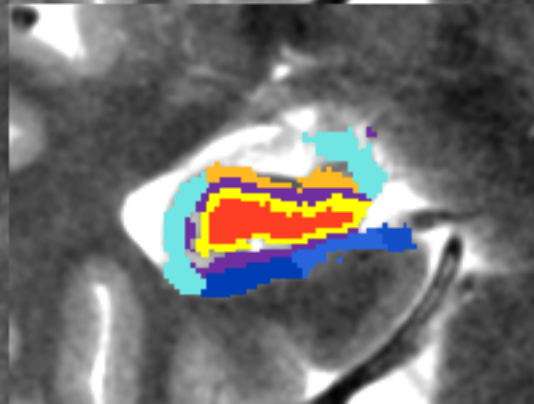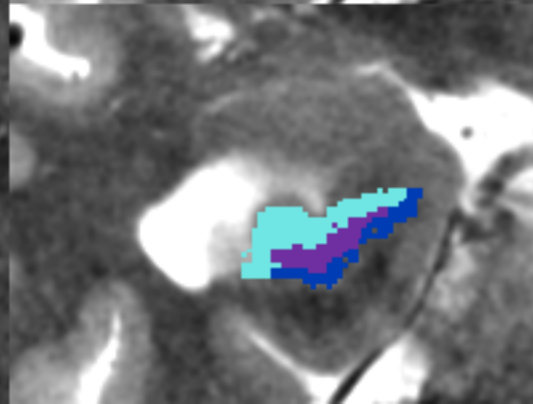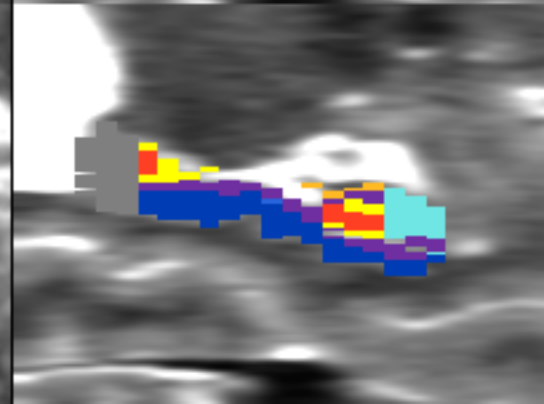

hemi=R,subject=7175272

MRI

hippunfoldT1

ashs

freesurfer

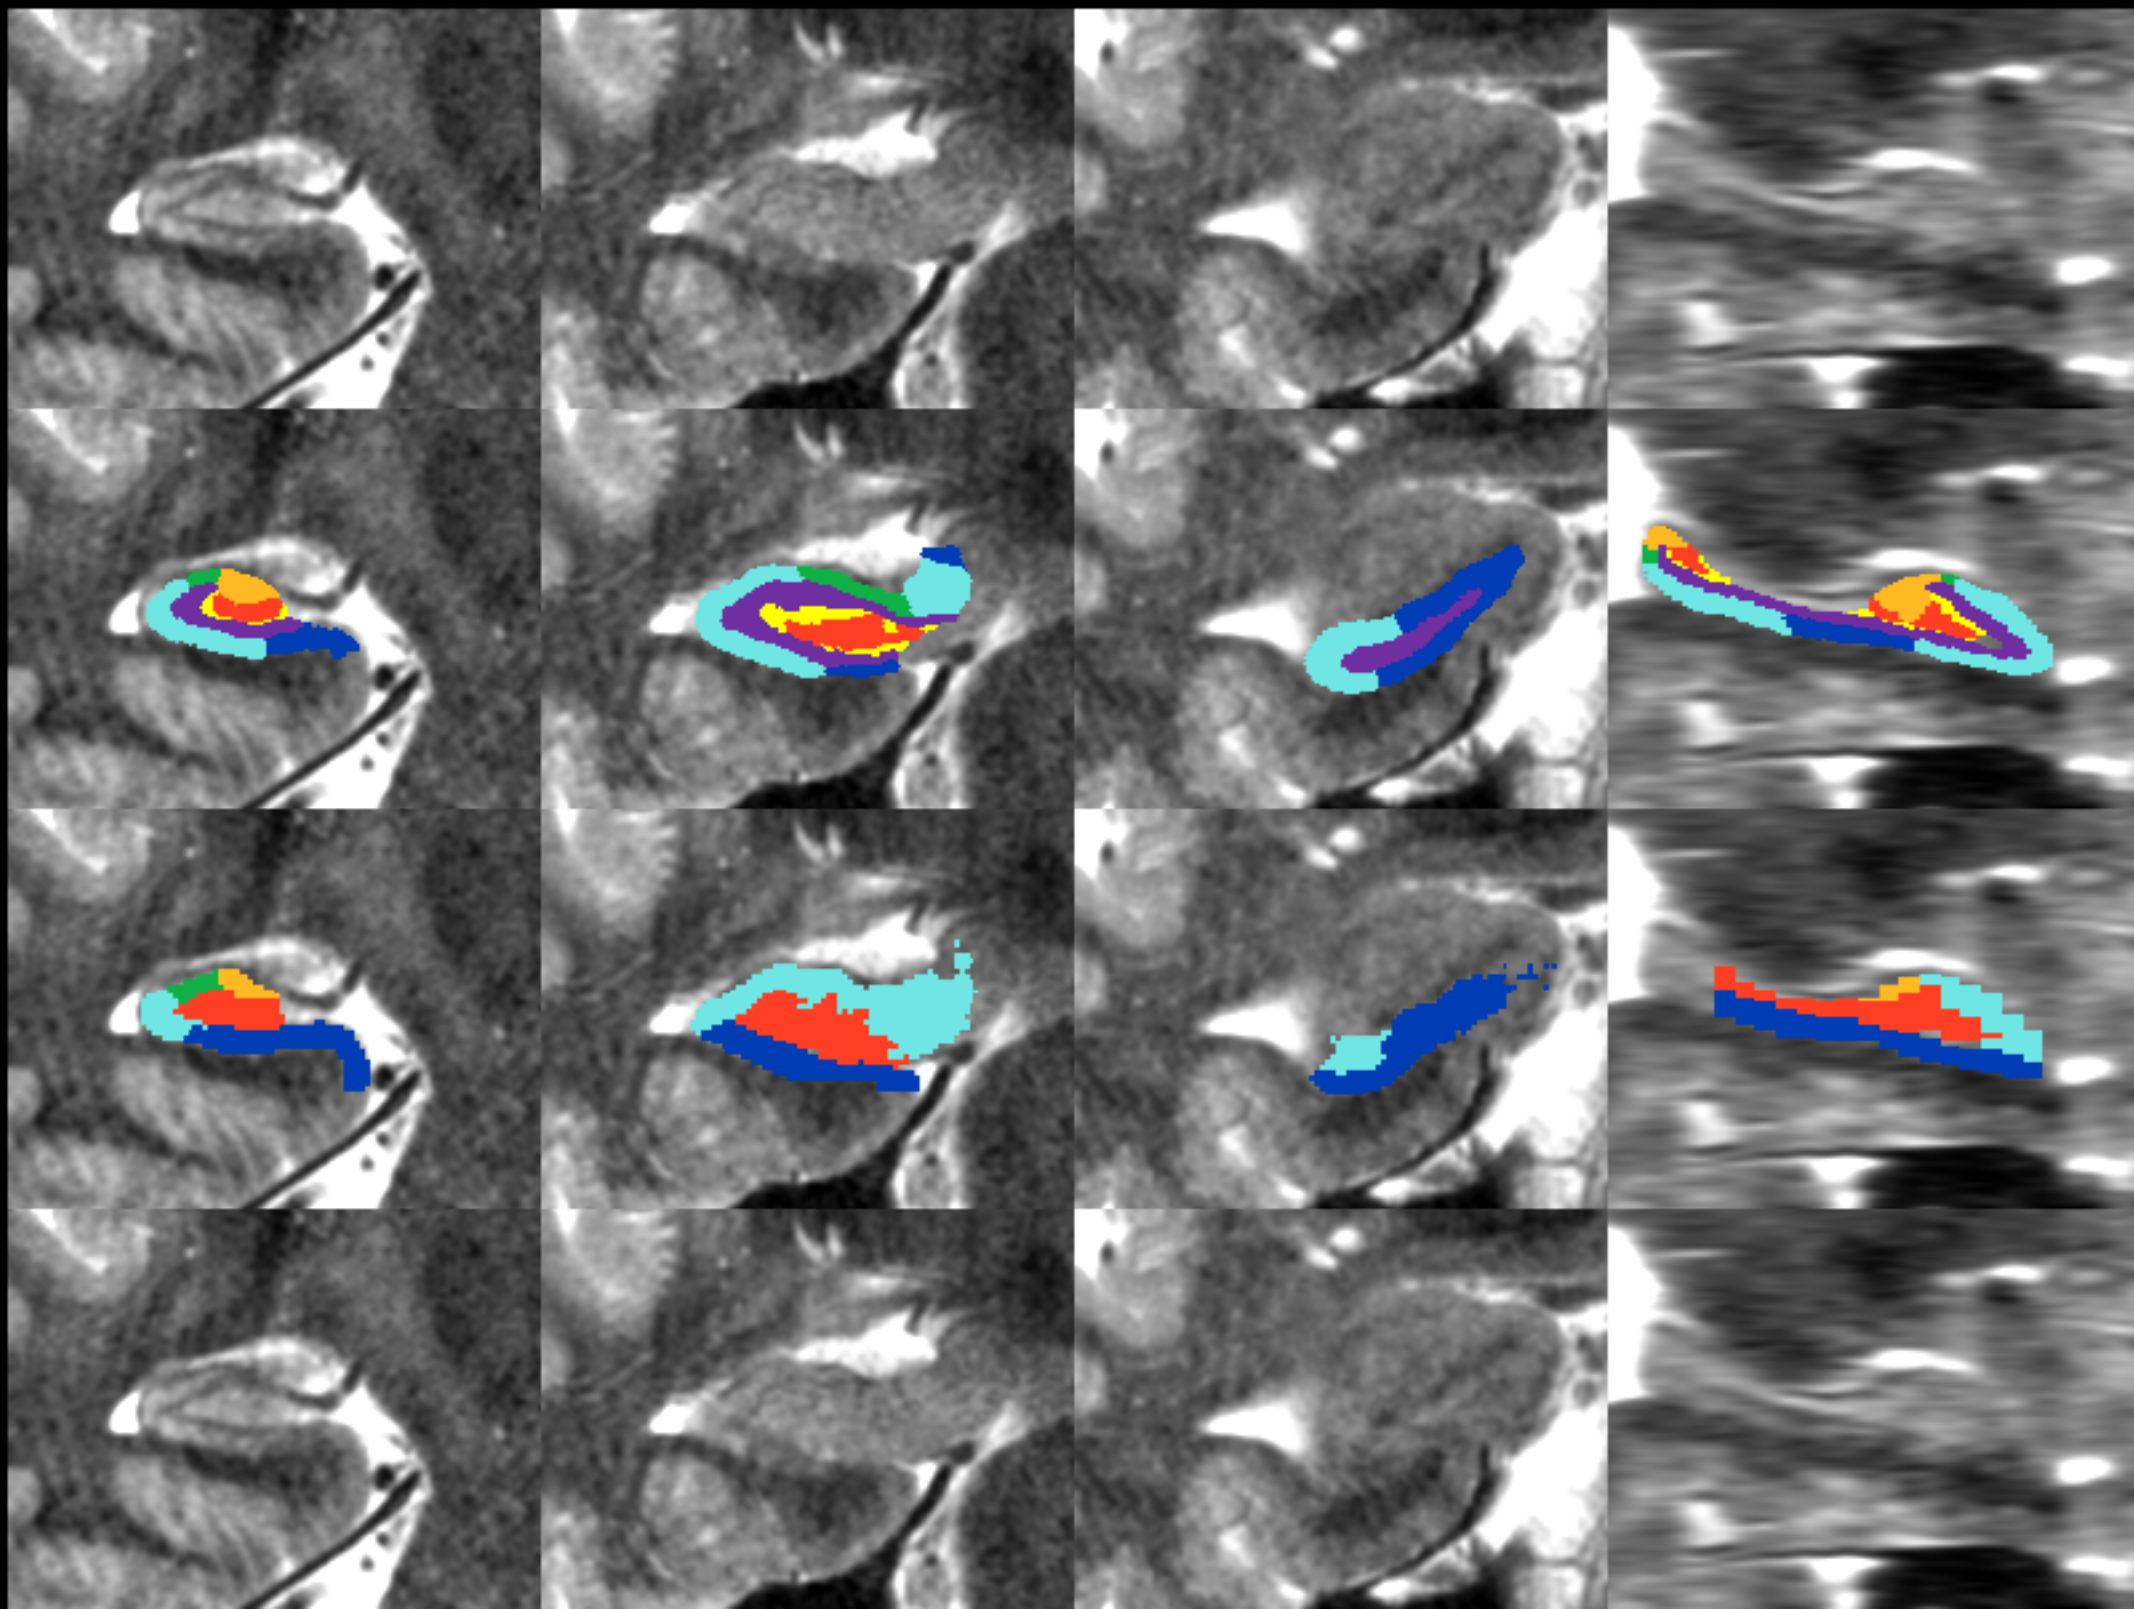

hemi=R,subject=7195884

MRI

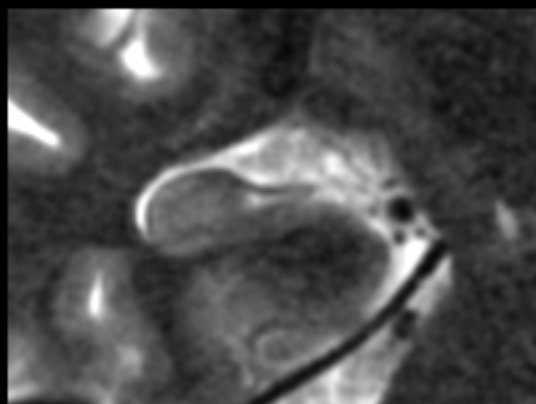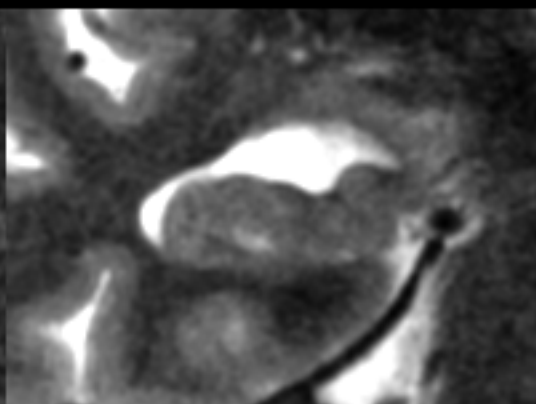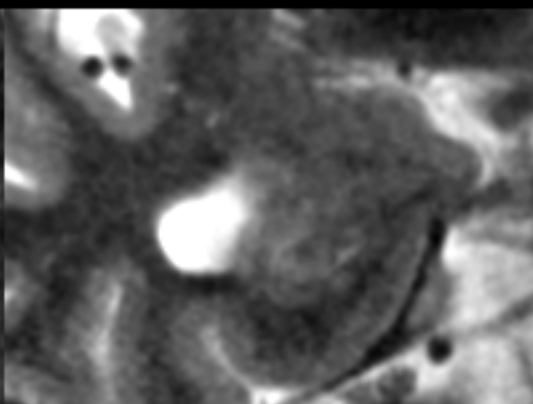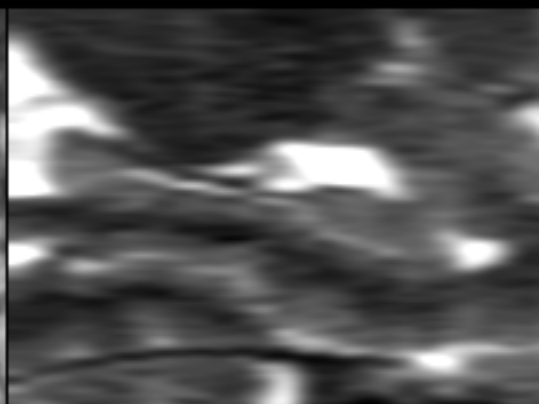

hippunfoldT1

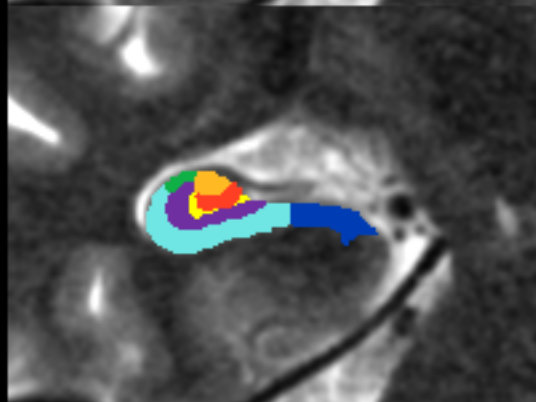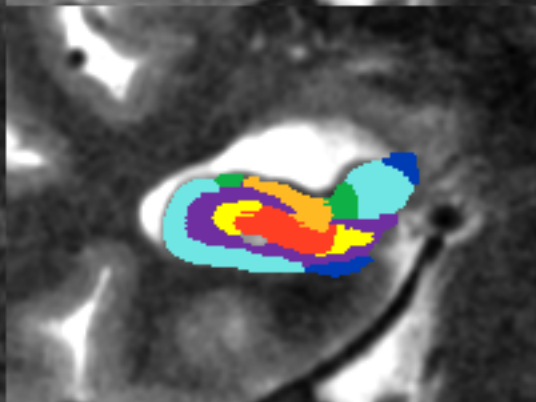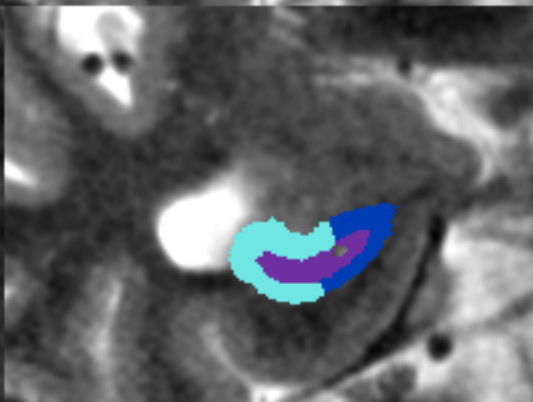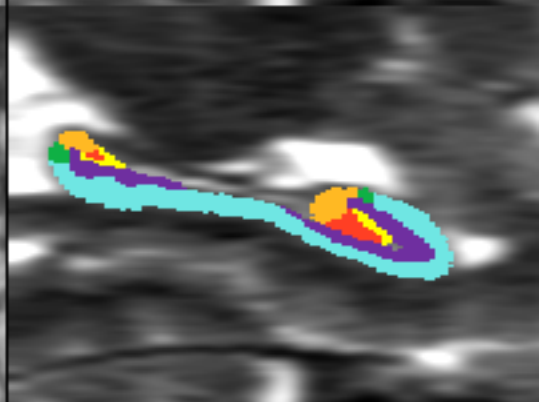

ashs

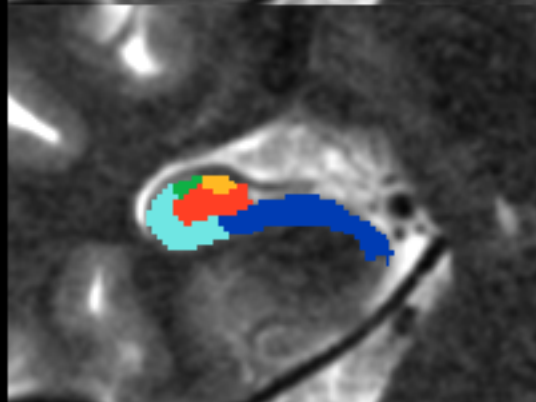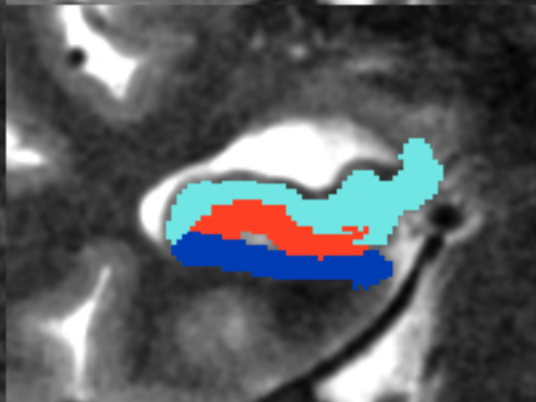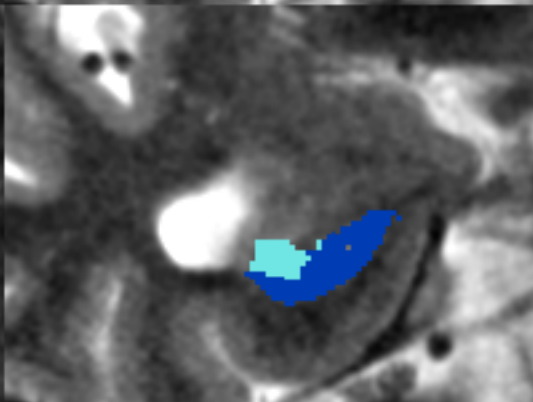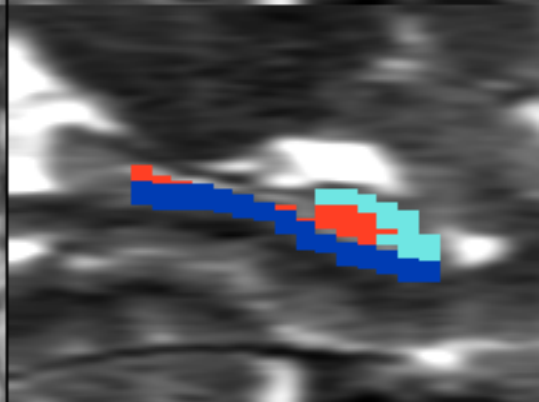

freesurfer

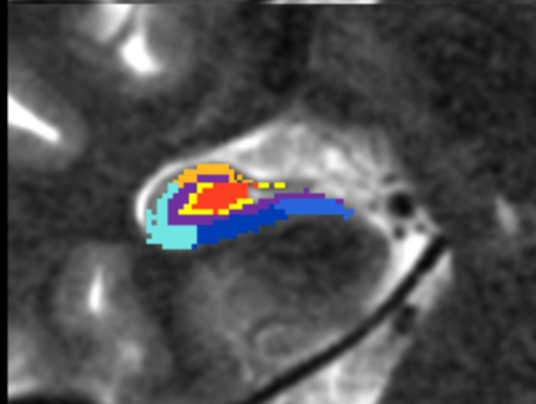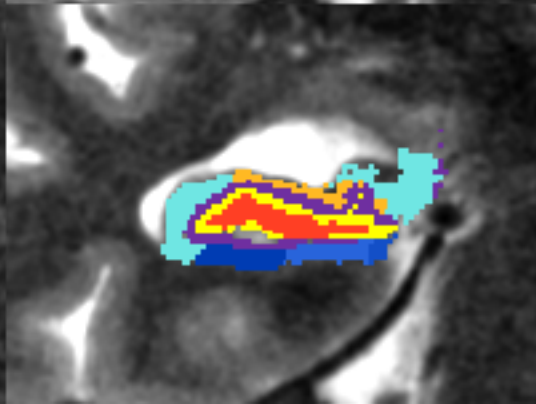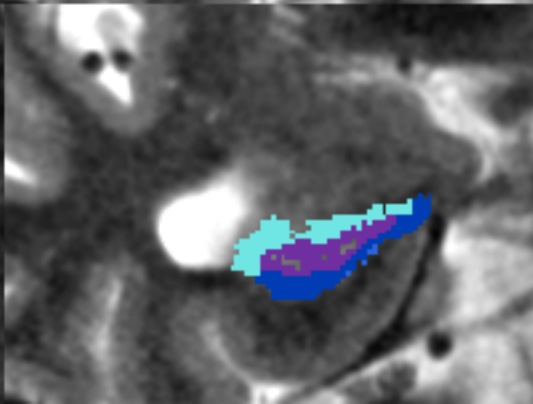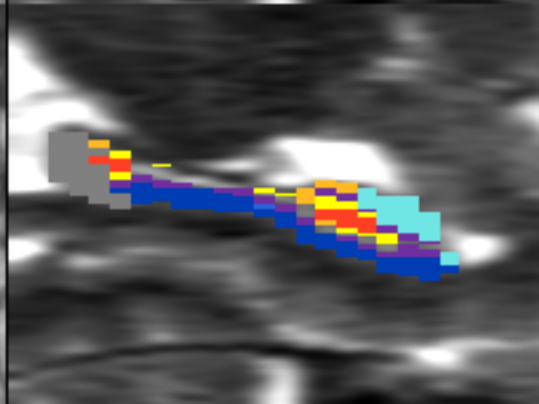

hemi=R,subject=7243263

MRI

hippunfoldT1

ashs

freesurfer

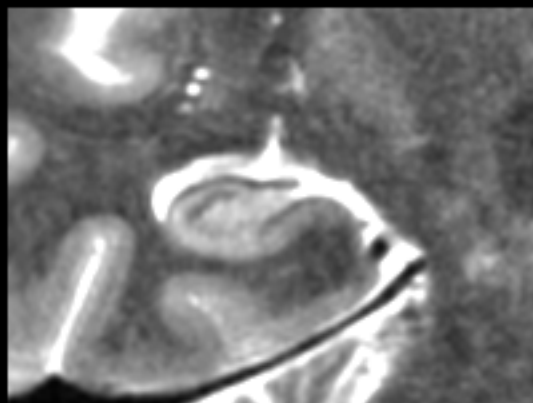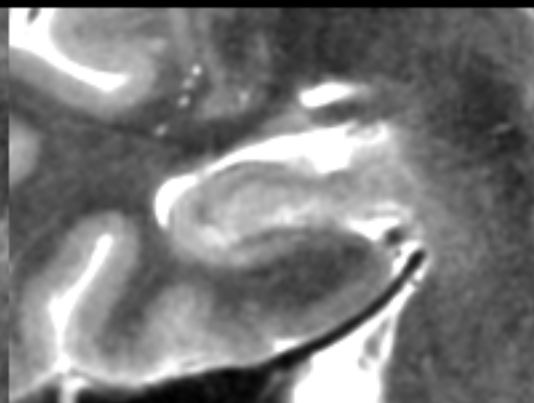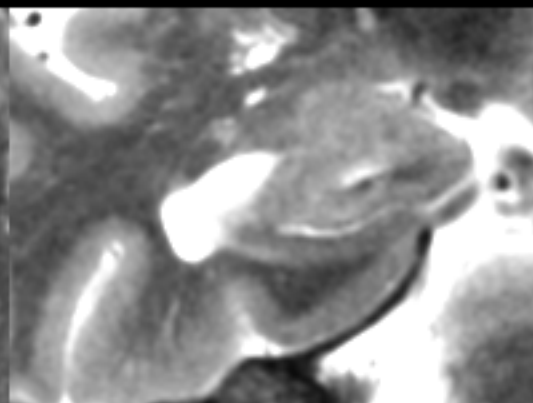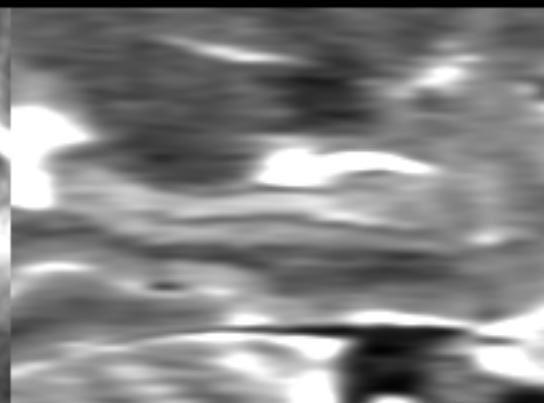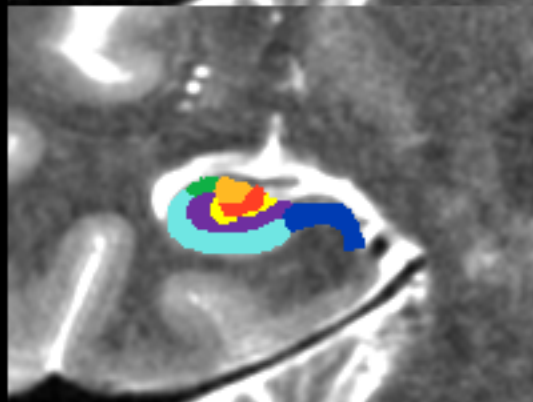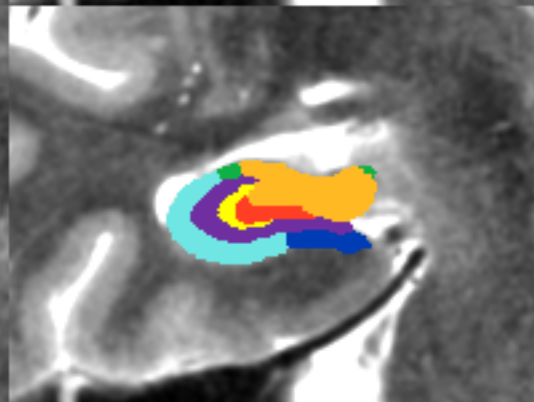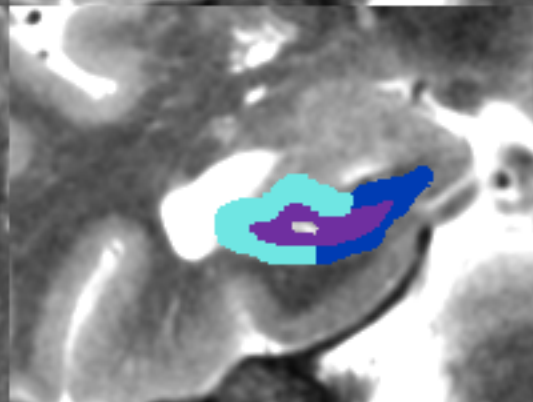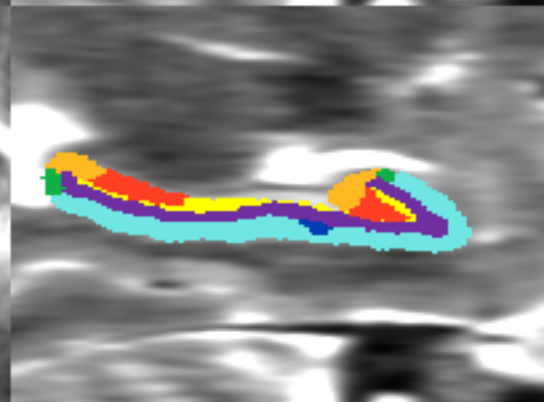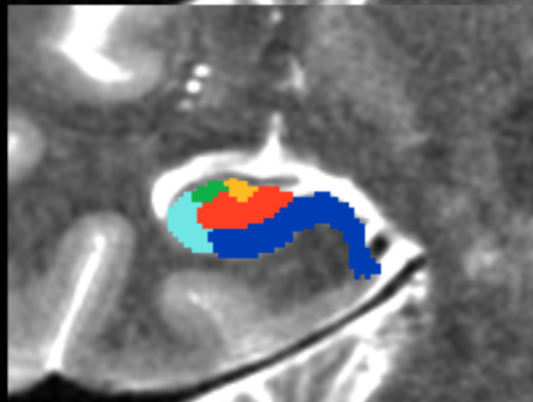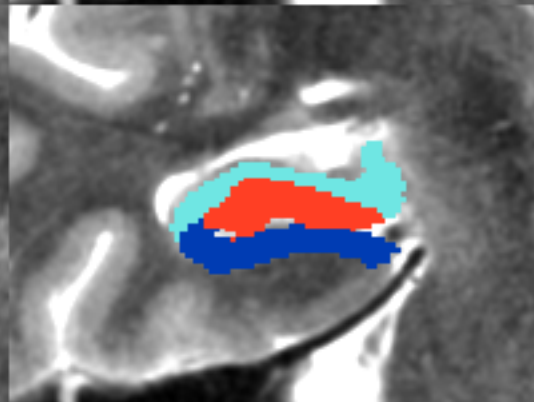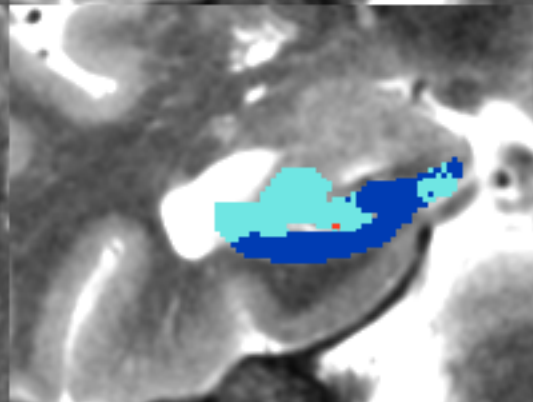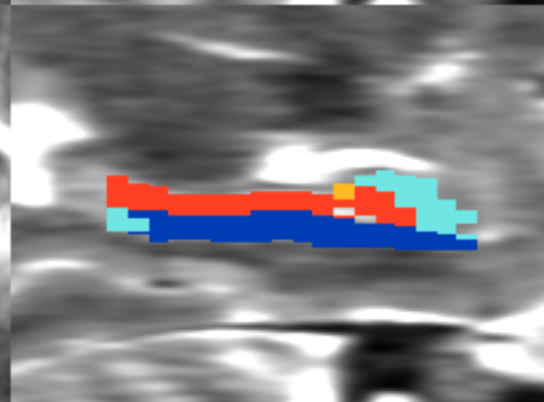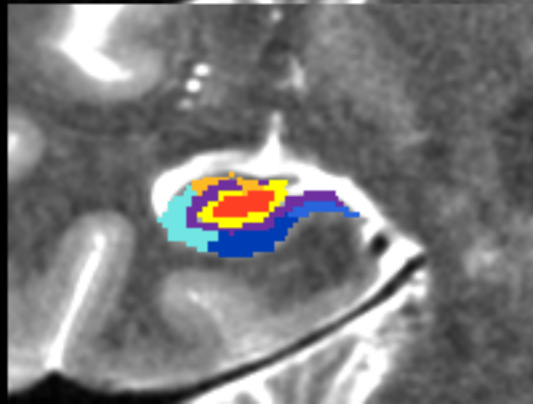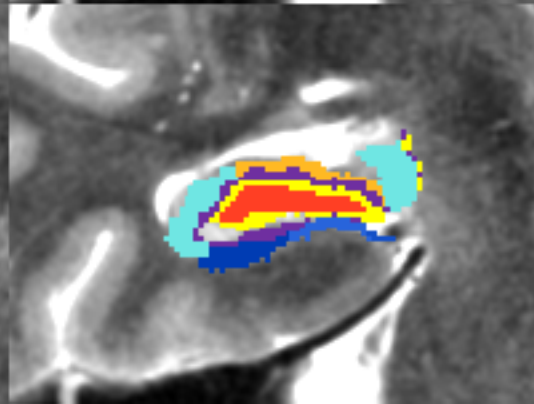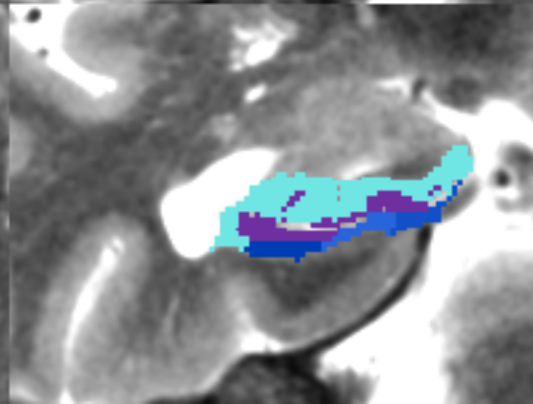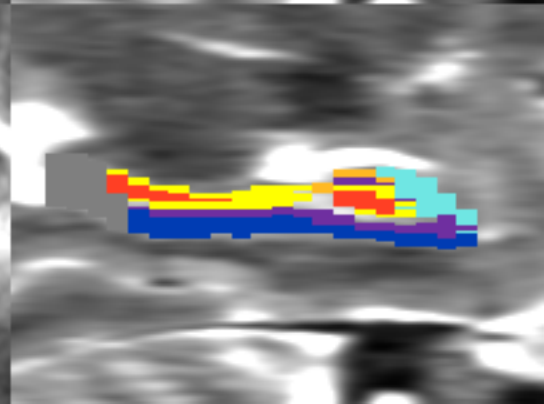

hemi=R,subject=7268178

MRI

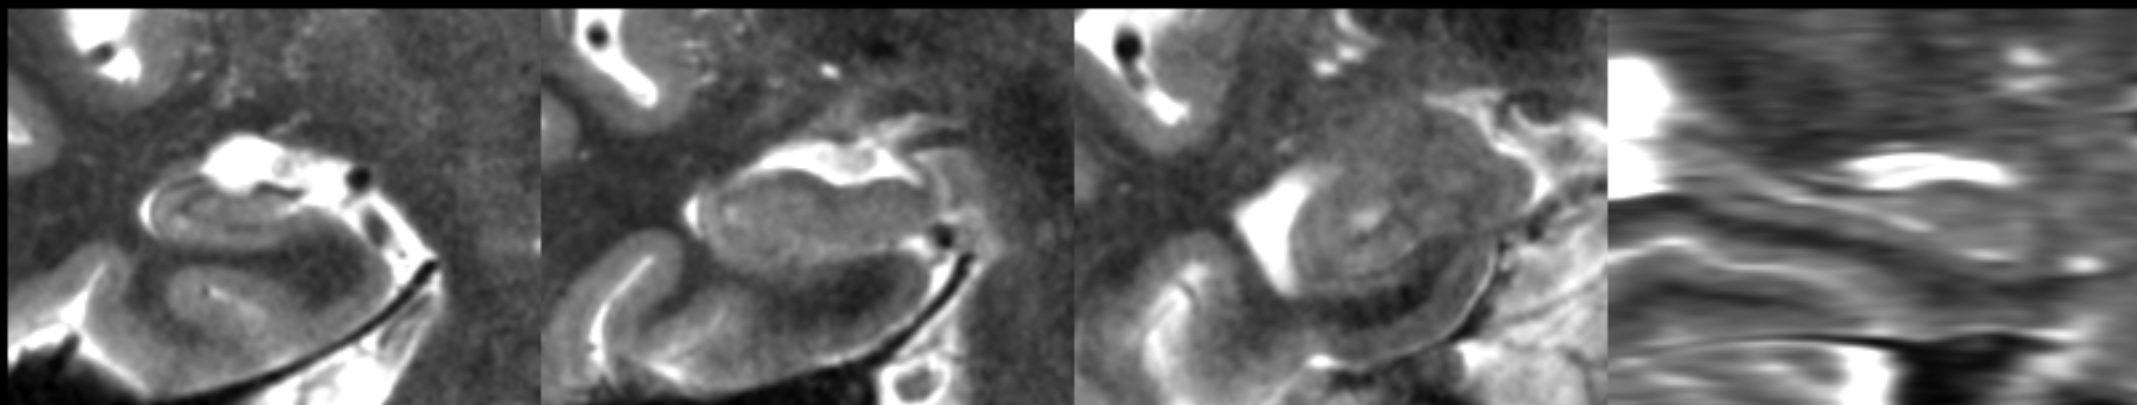

hippunfoldT1

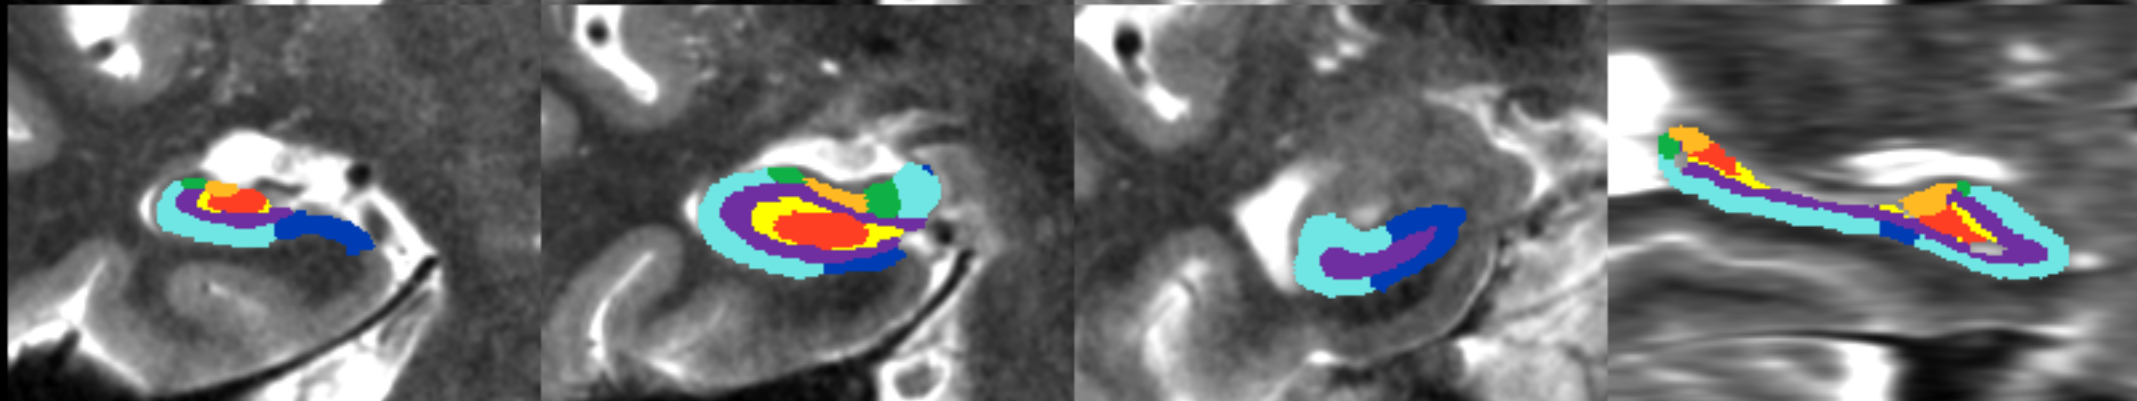

ashs

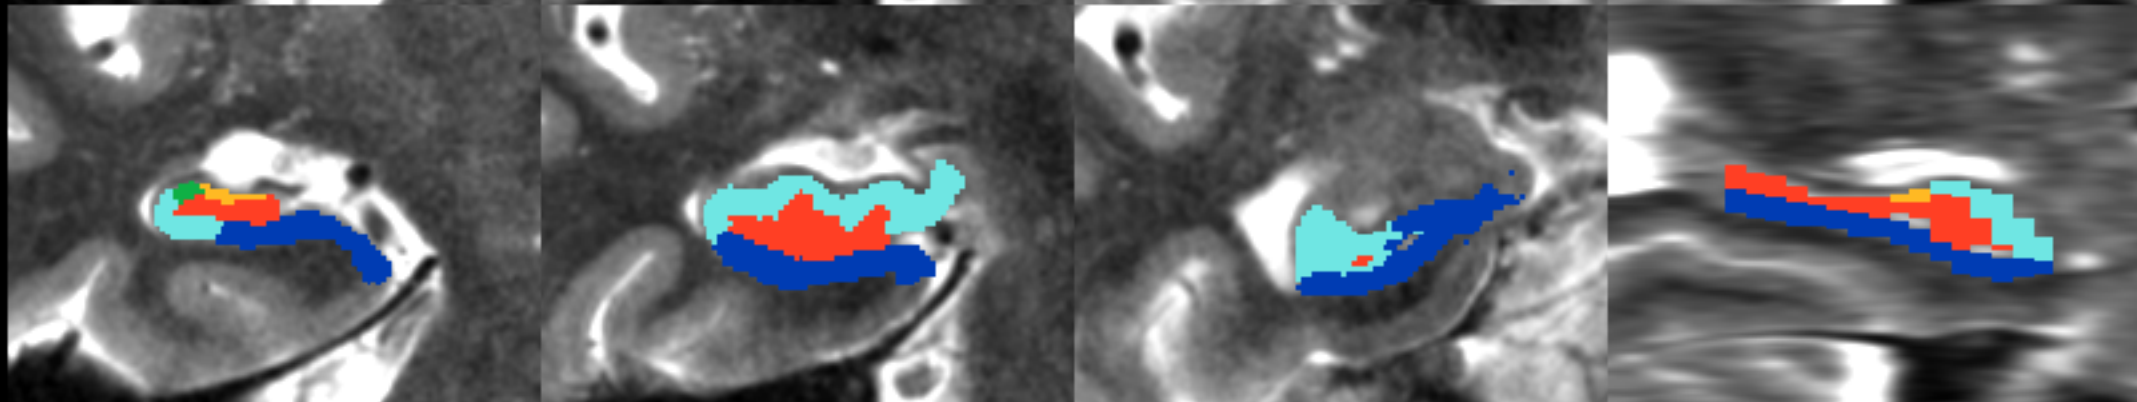

freesurfer

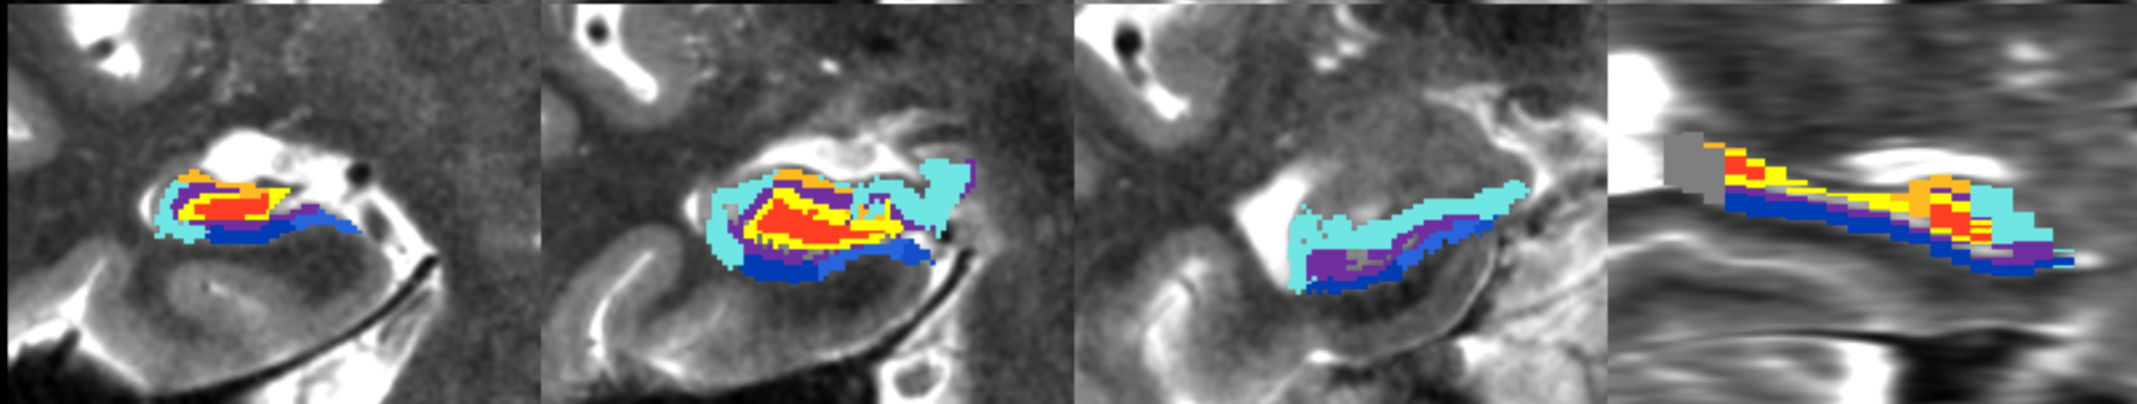



hemi=R,subject=7307768

MRI

hippunfoldT1

ashs

freesurfer

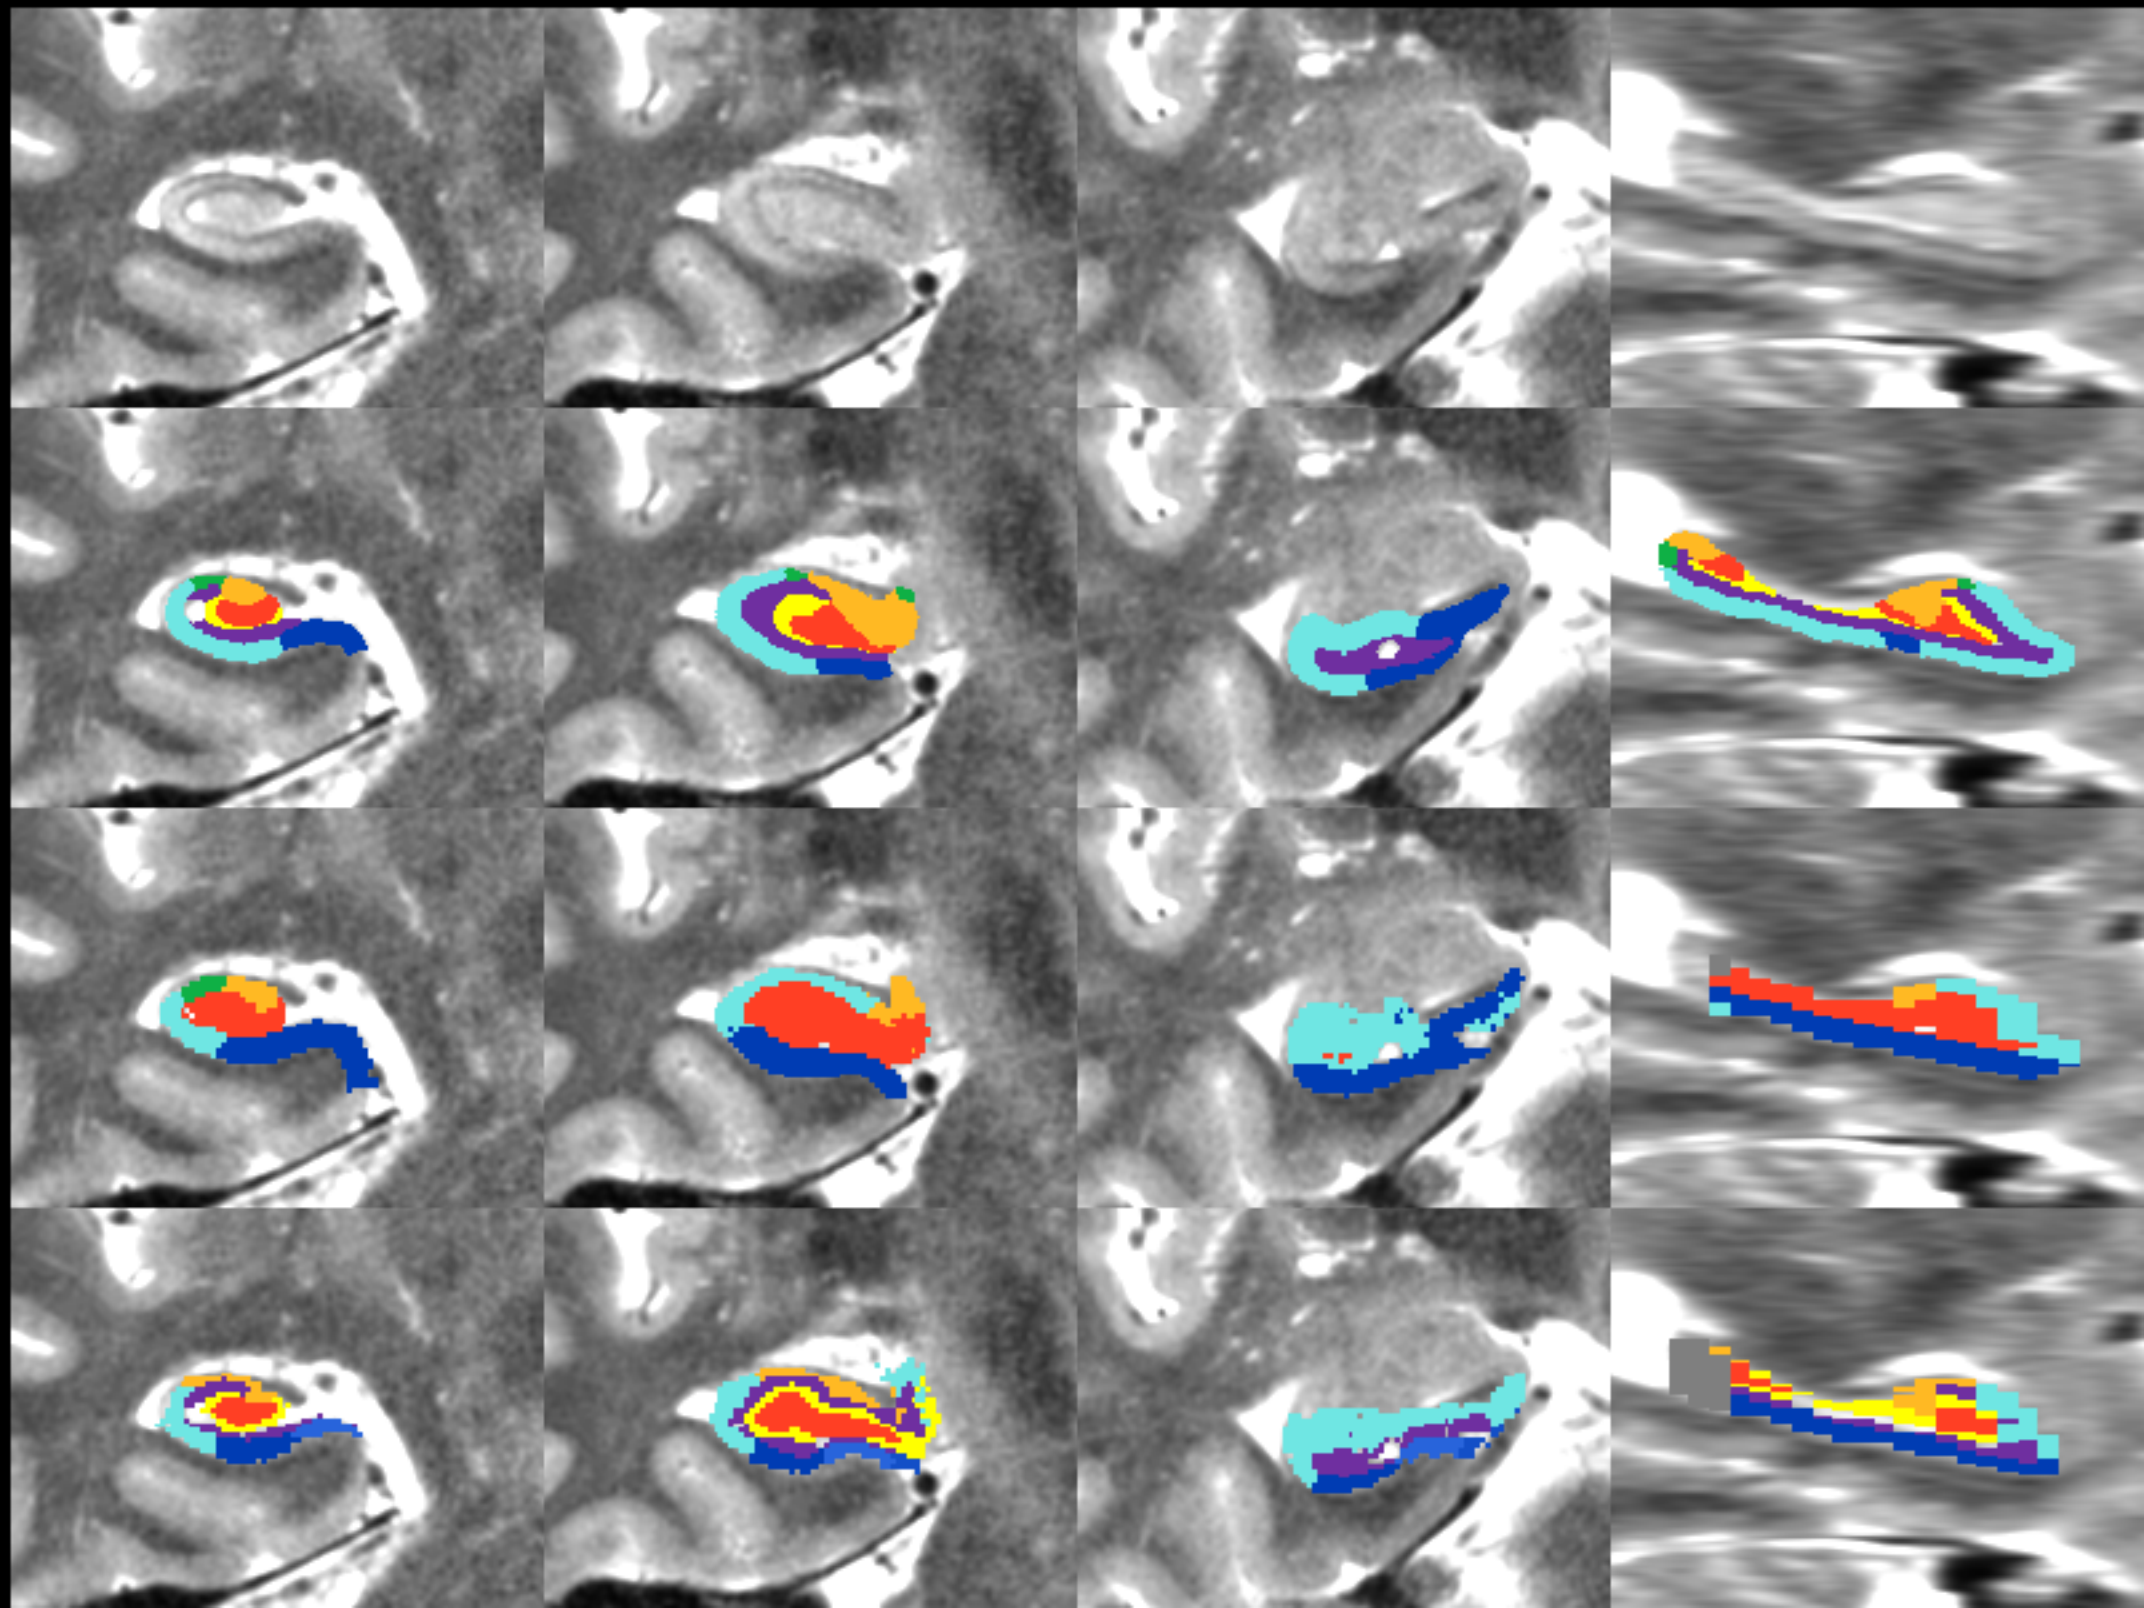

hemi=R,subject=7447784

MRI

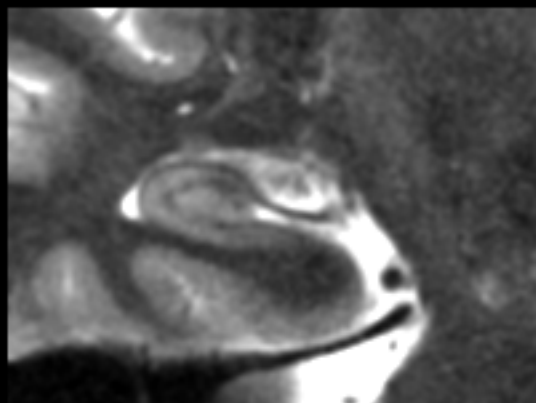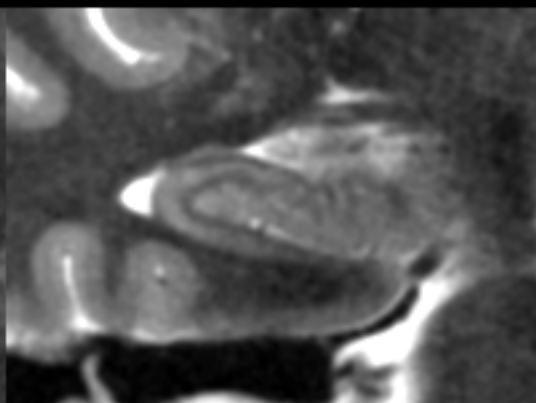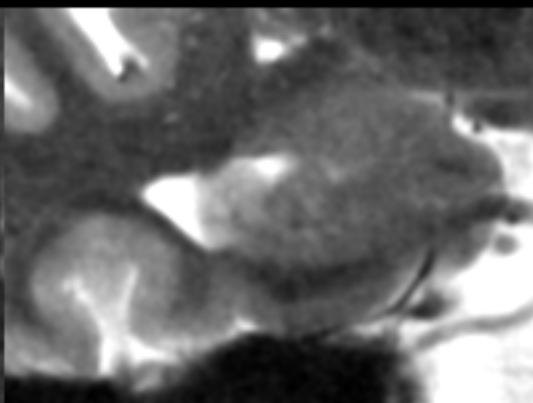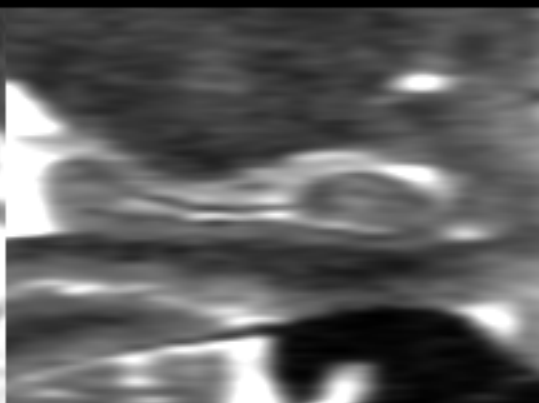

hippunfoldT1

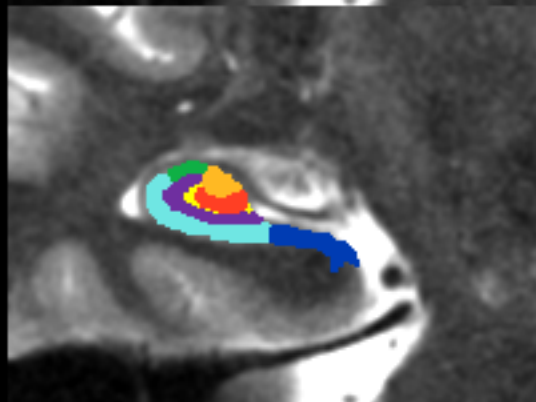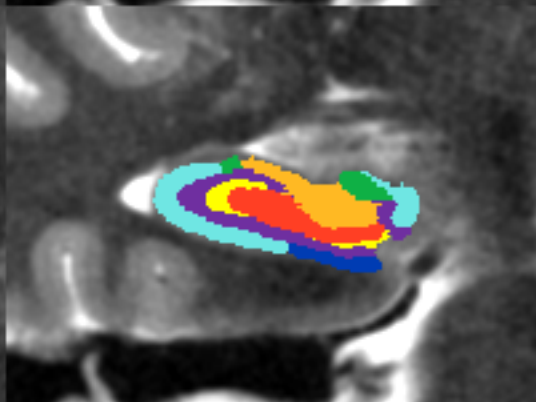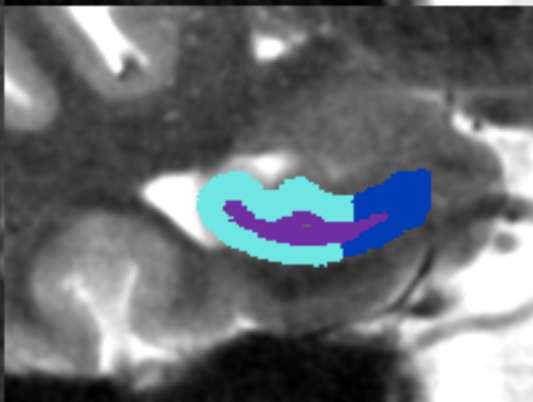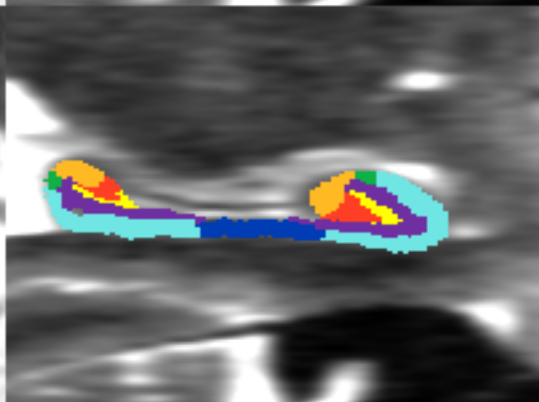

ashs

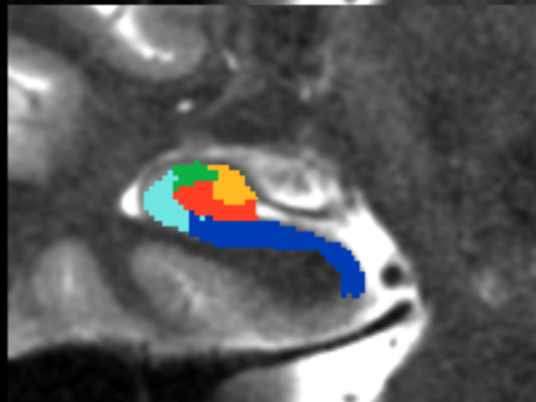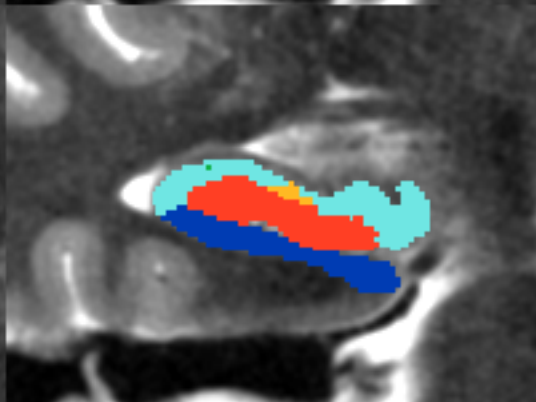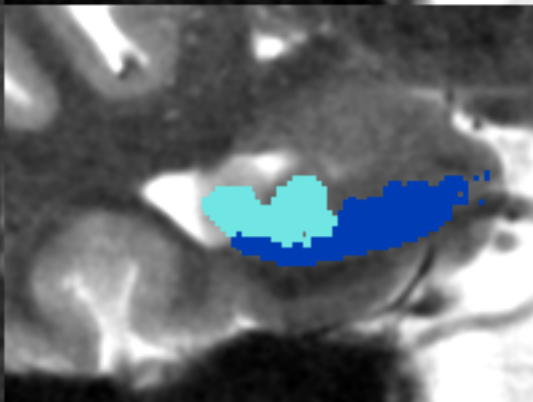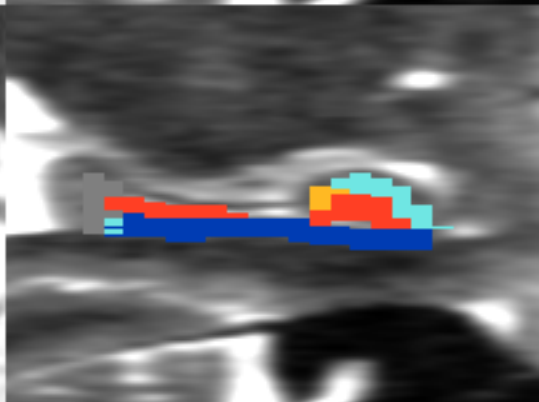

freesurfer

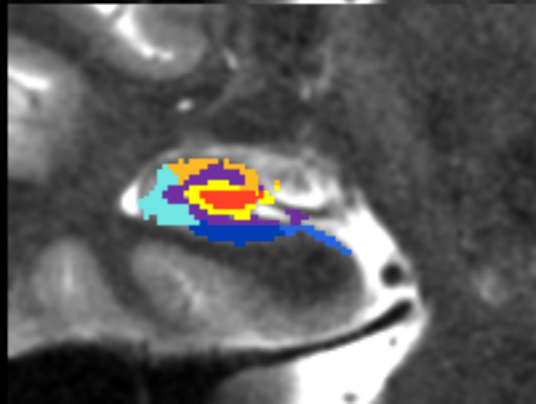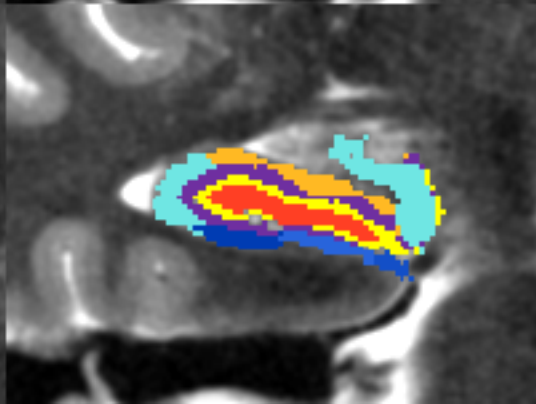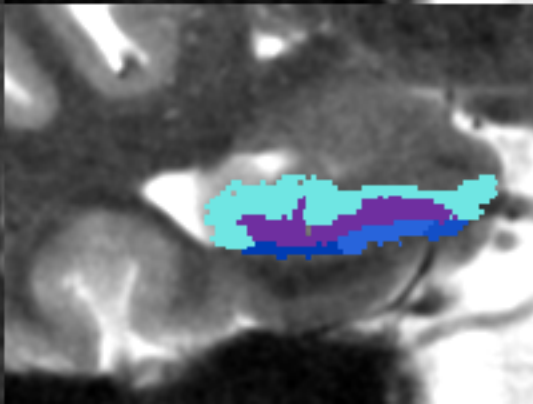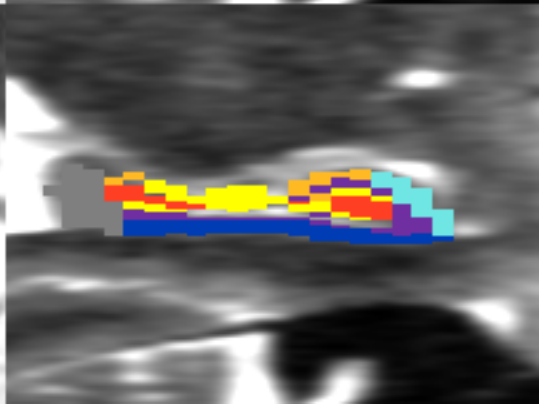

hemi=R,subject=7495593

MRI

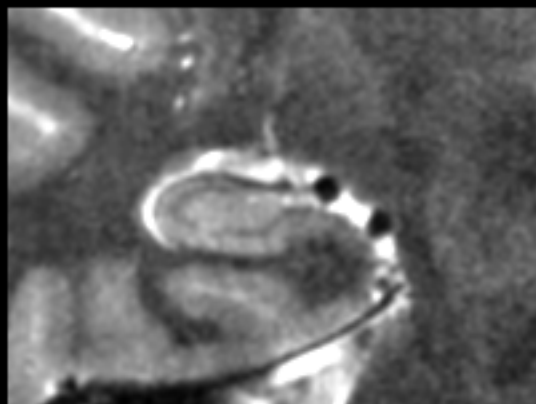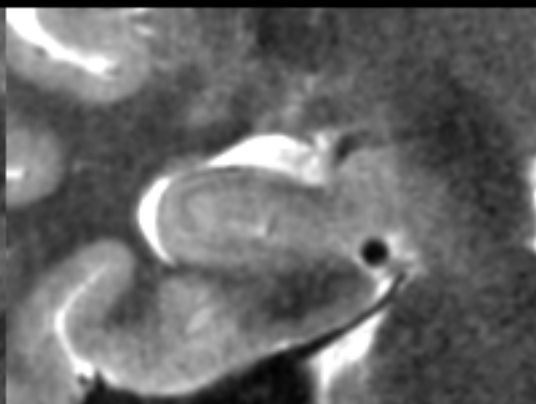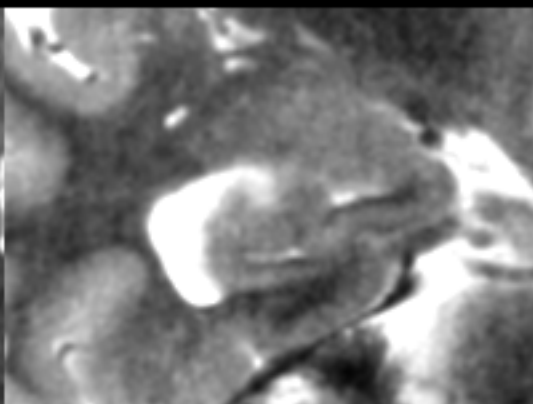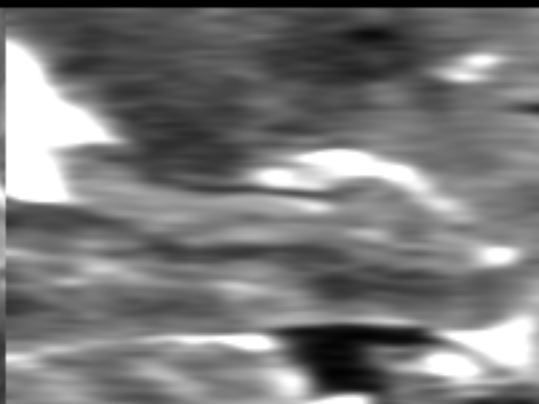

hippunfoldT1

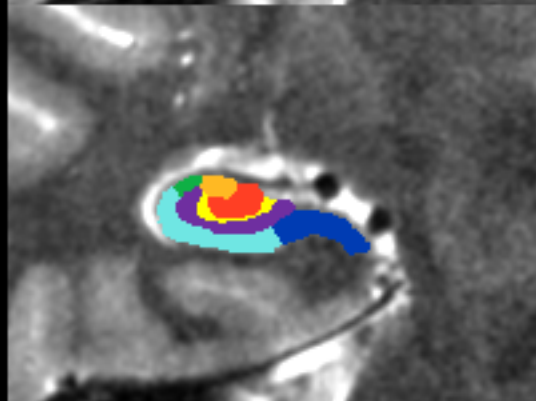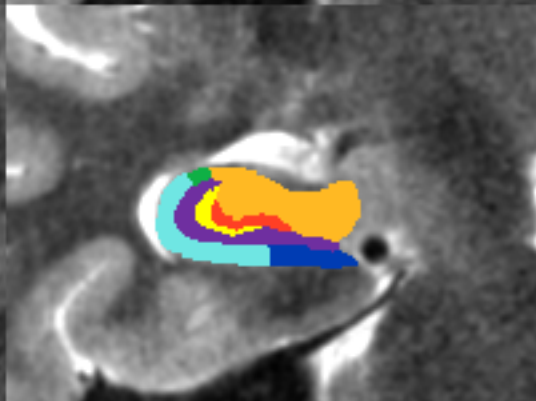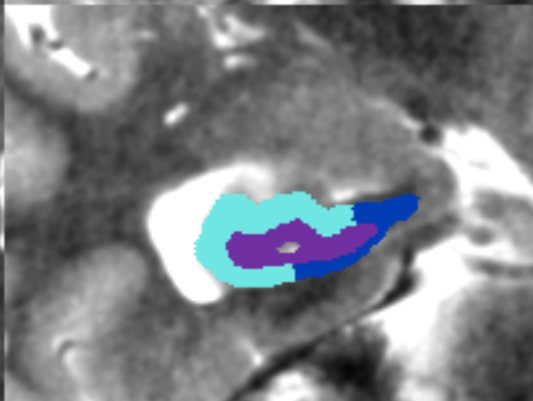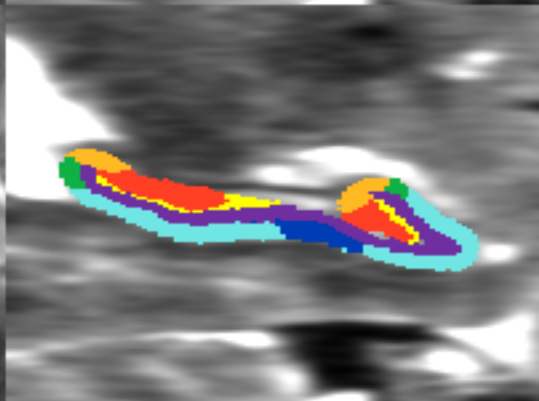

ashs

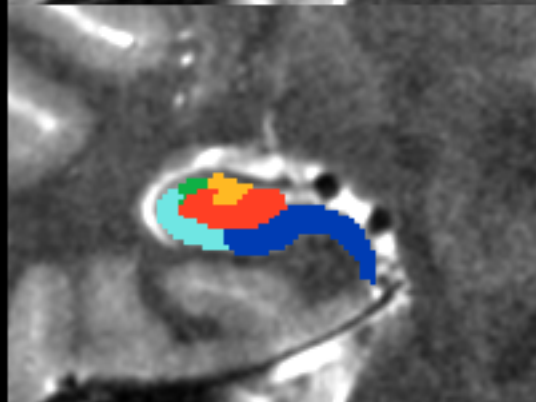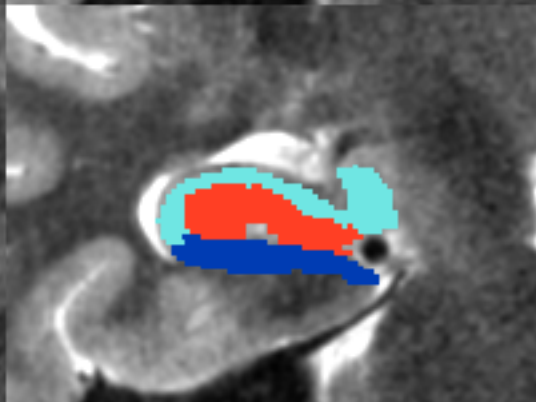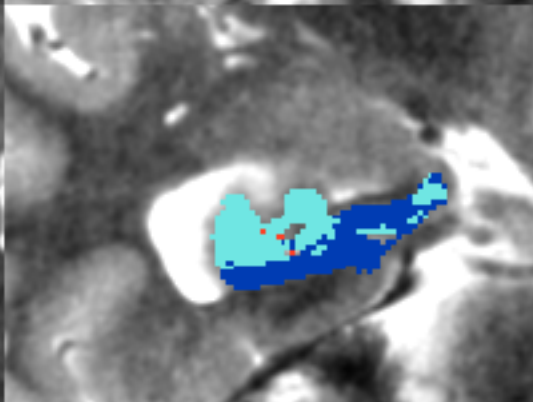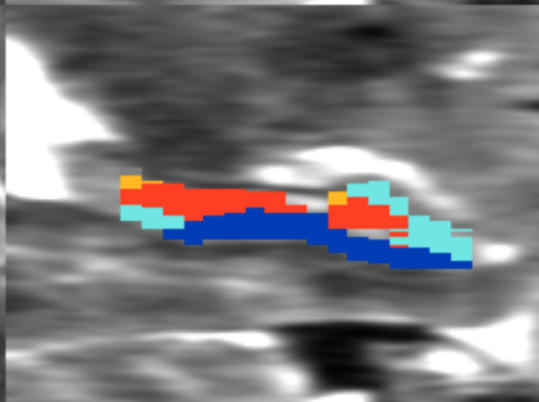

freesurfer

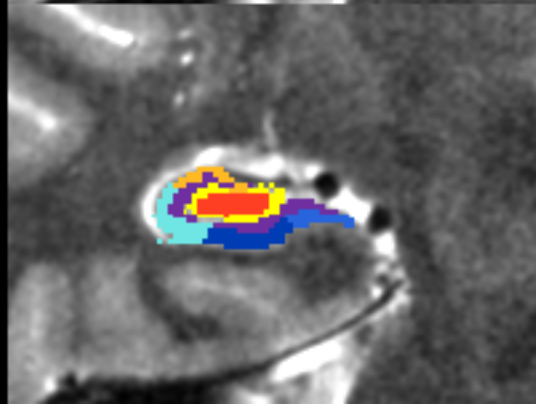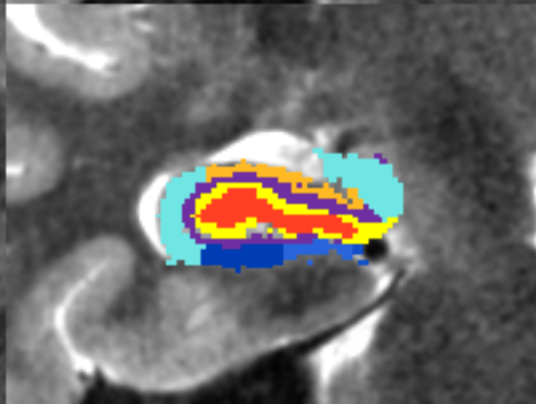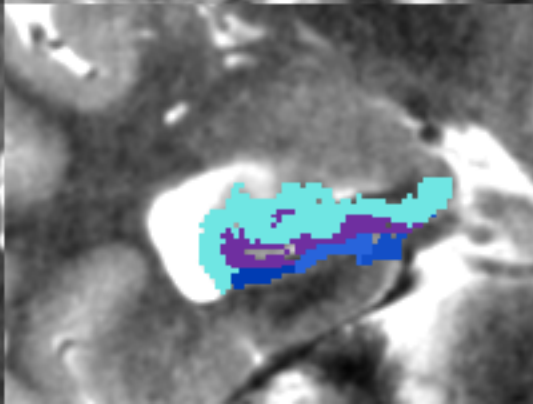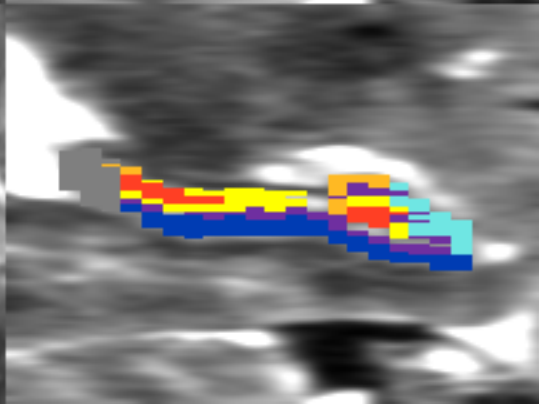

hemi=R,subject=7530670

MRI

hippunfoldT1

ashs

freesurfer

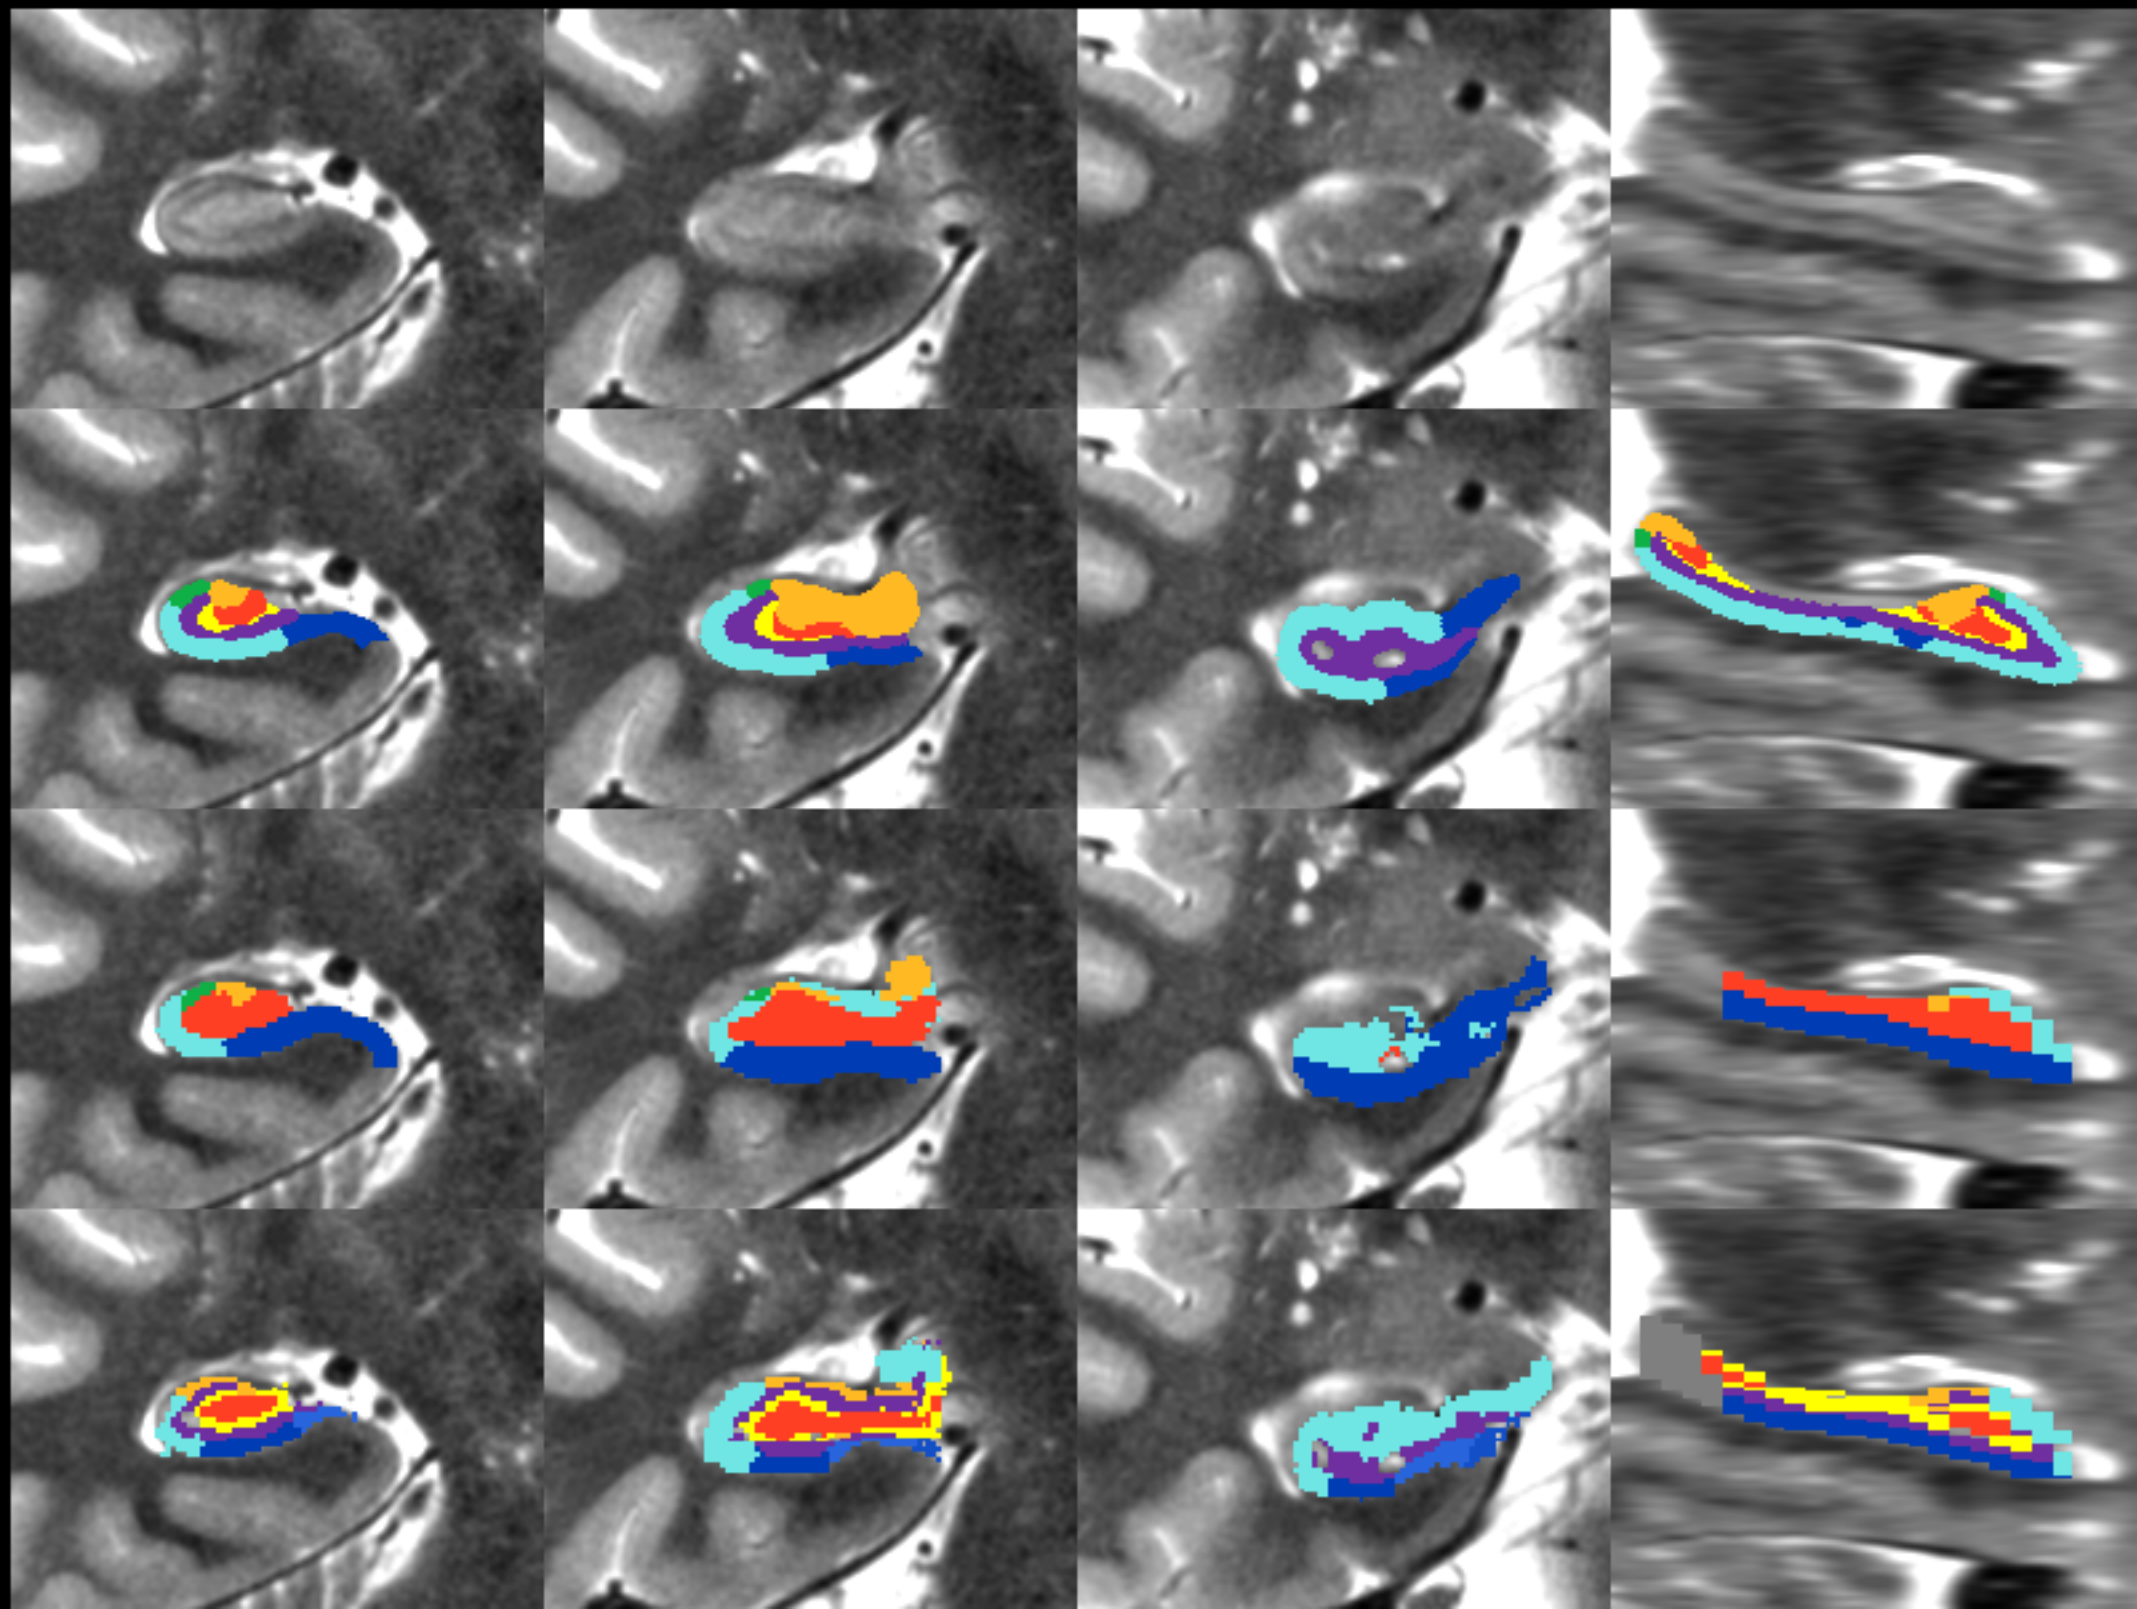

hemi=R,subject=7567693

MRI

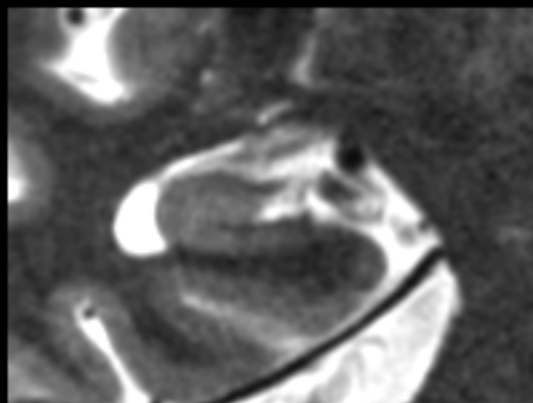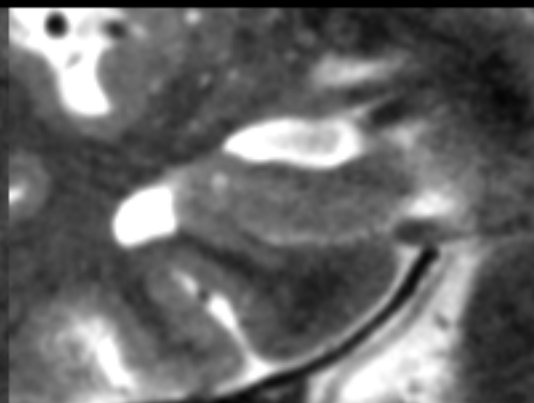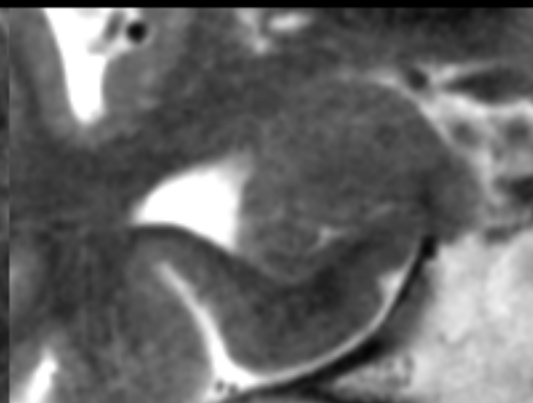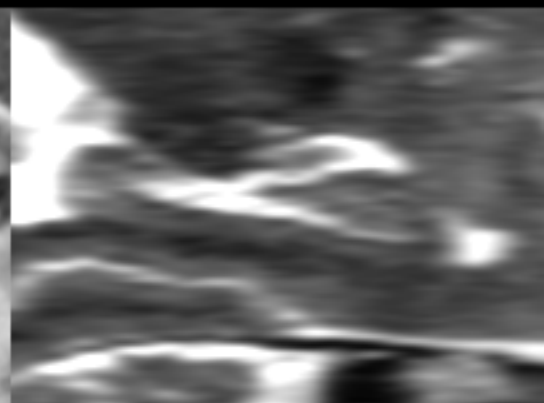

hippunfoldT1

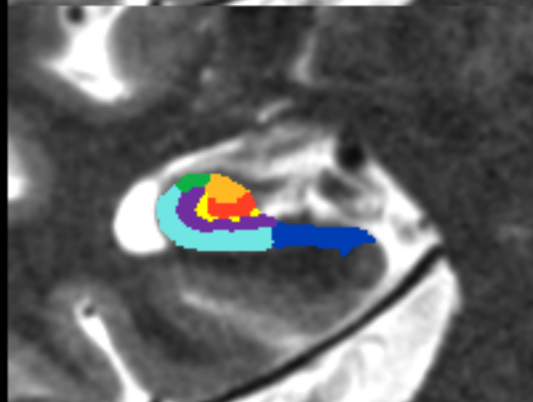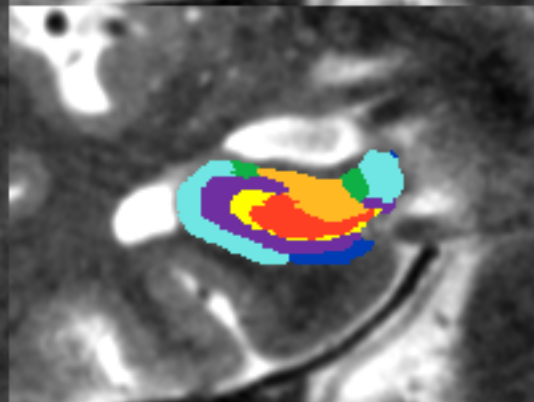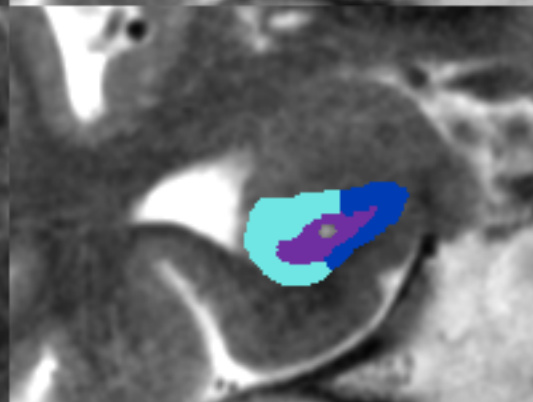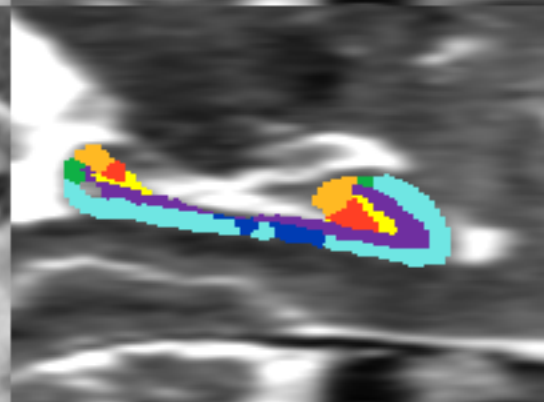

ashs

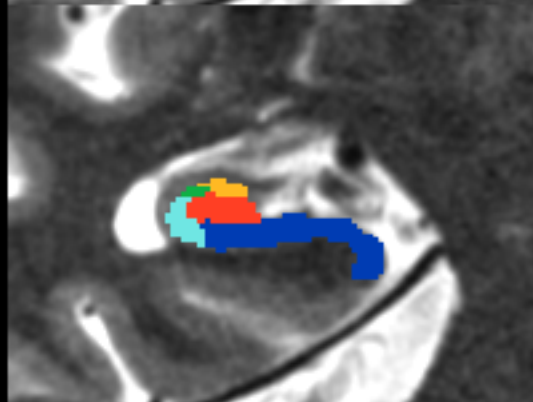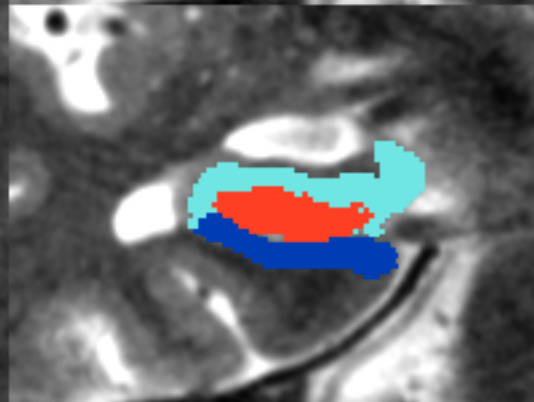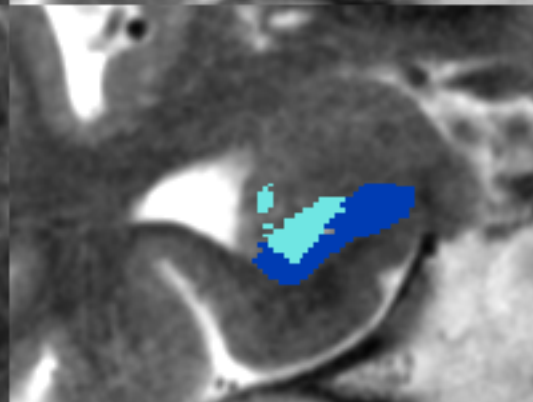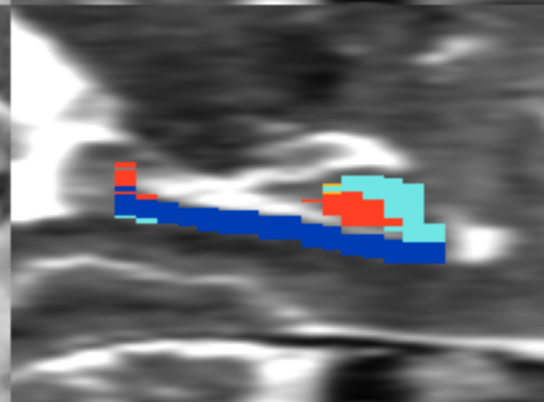

freesurfer

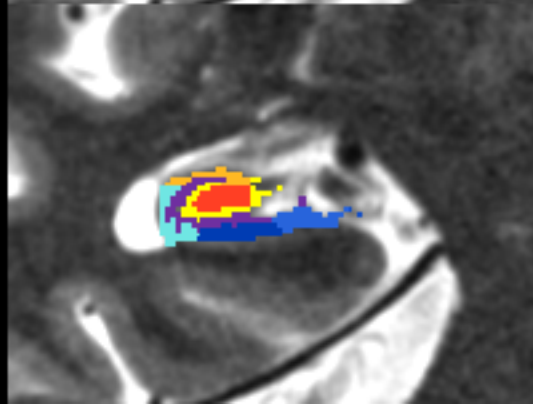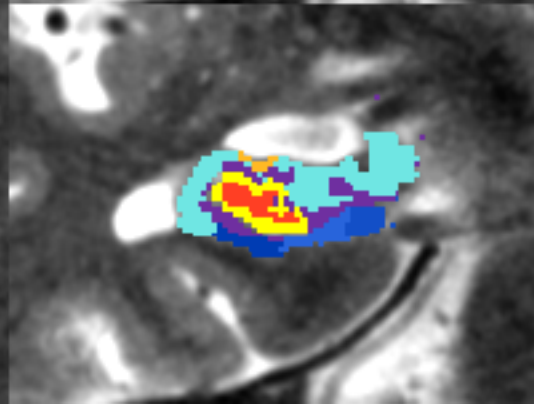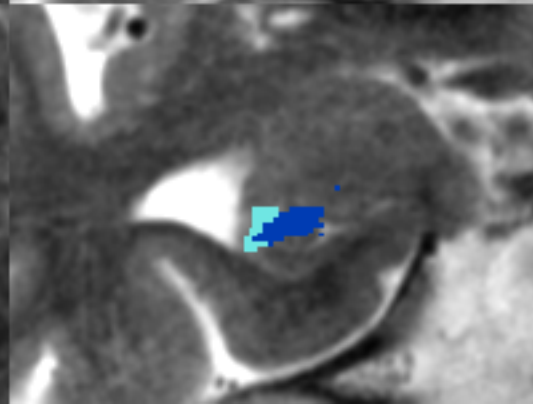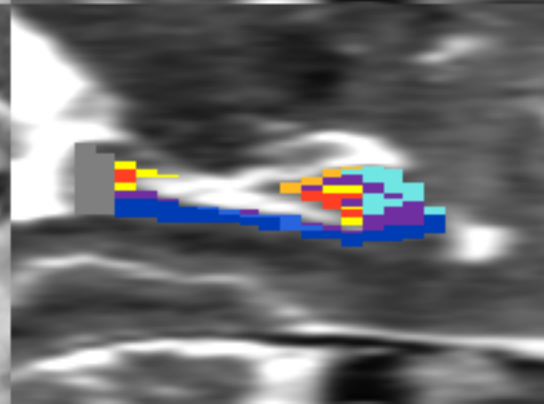

hemi=R,subject=7607477

MRI

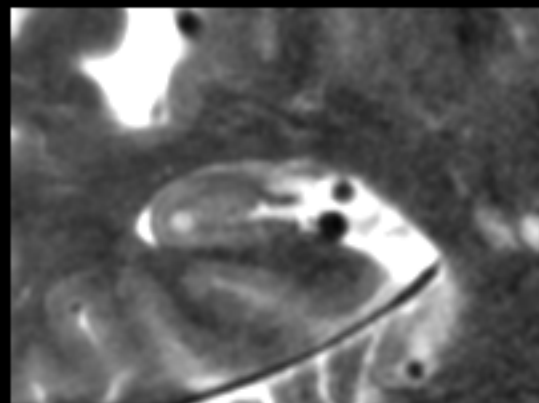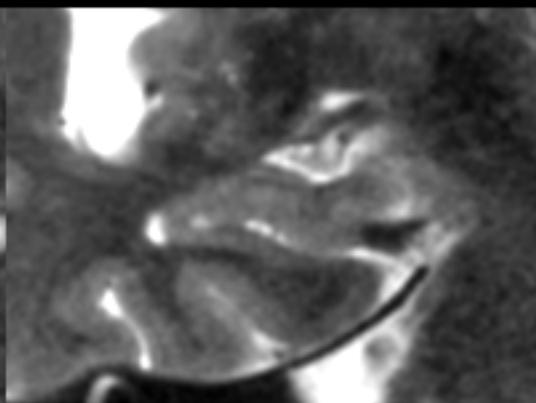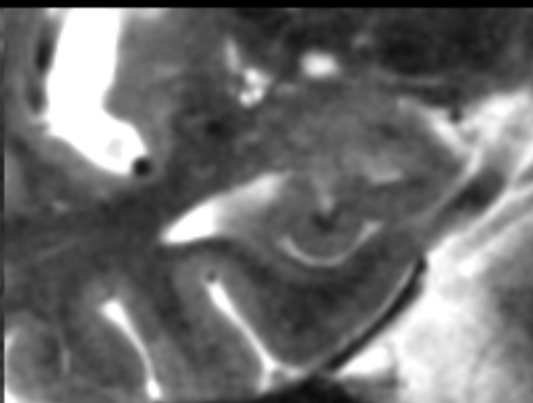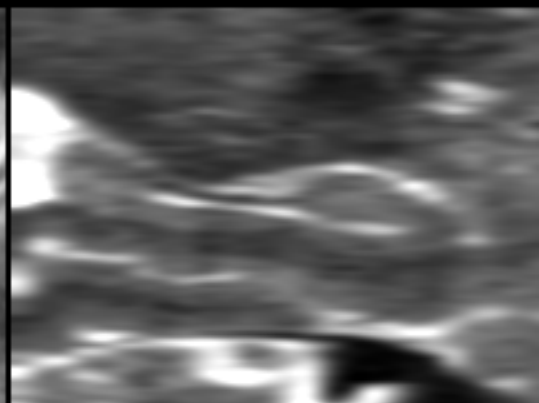

hippunfoldT1

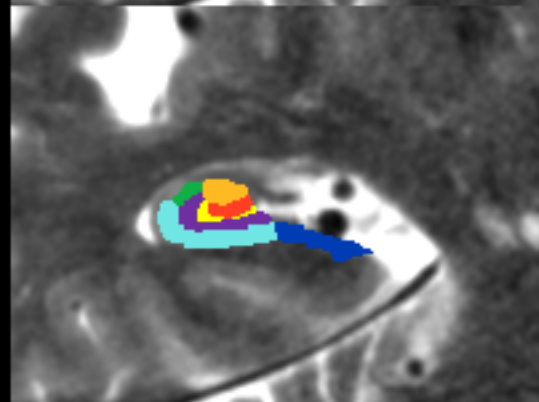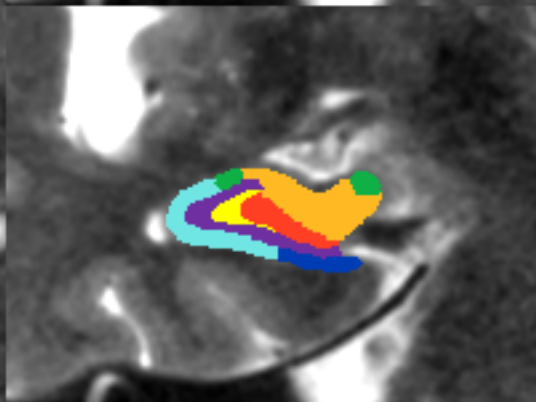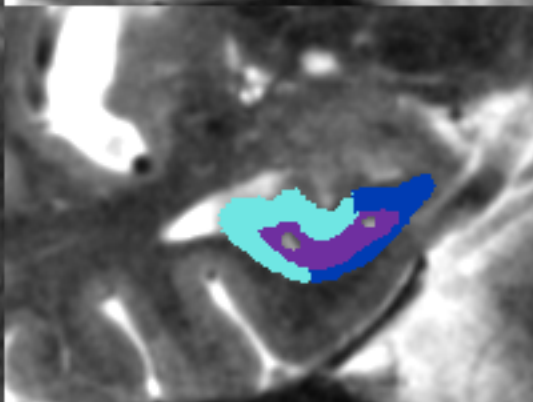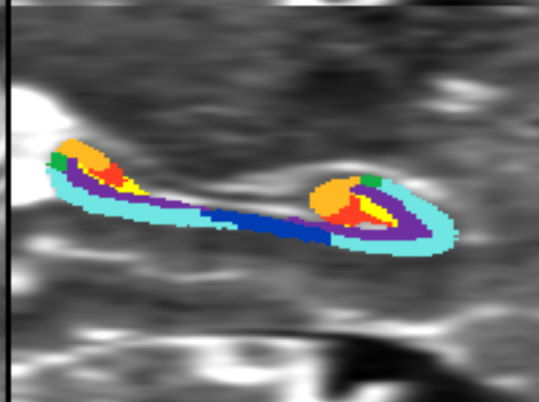

ashs

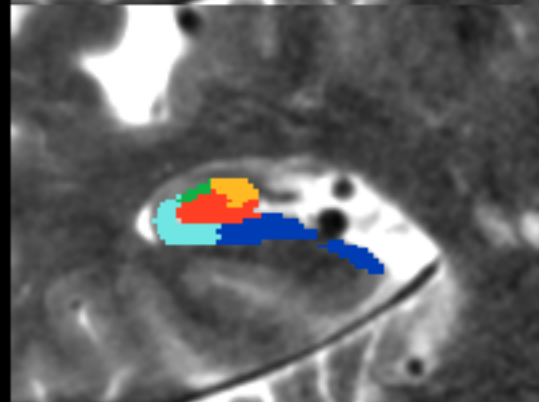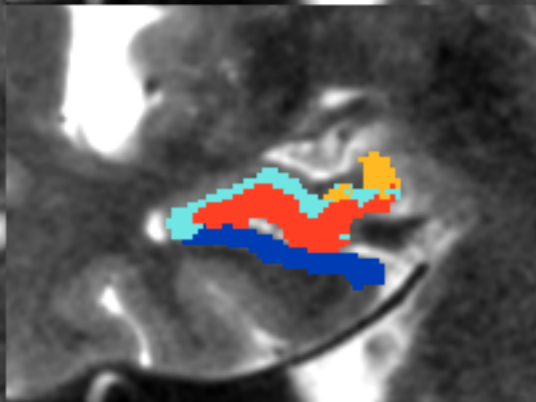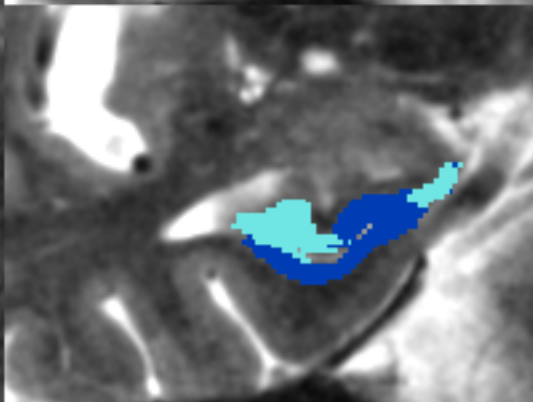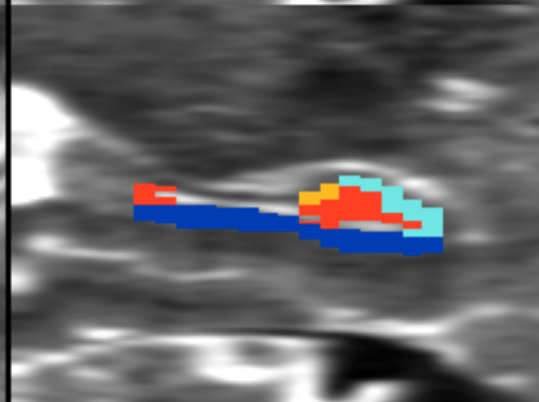

freesurfer

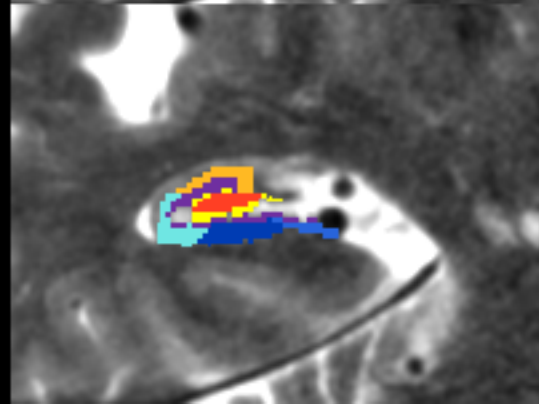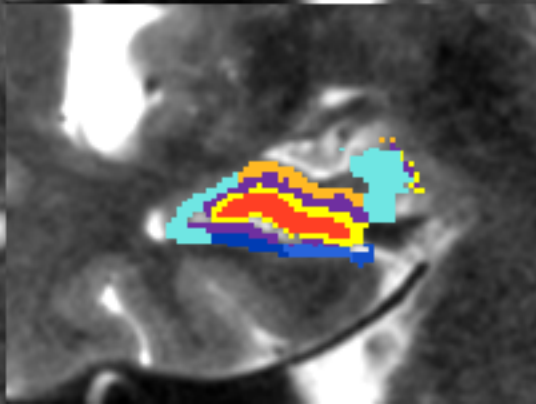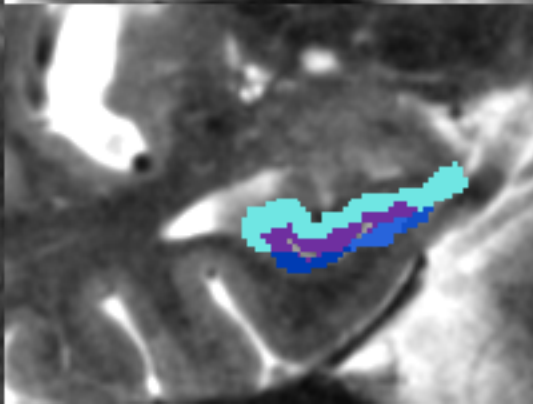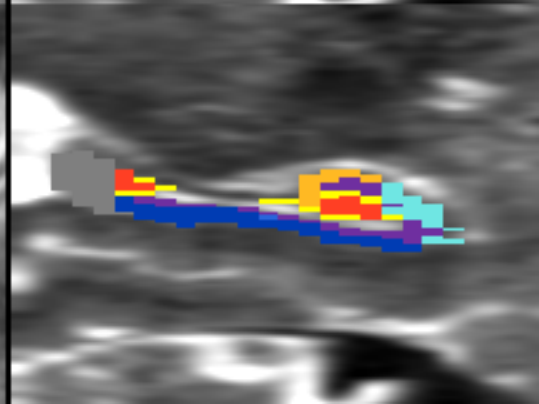

hemi=R,subject=7620469

MRI

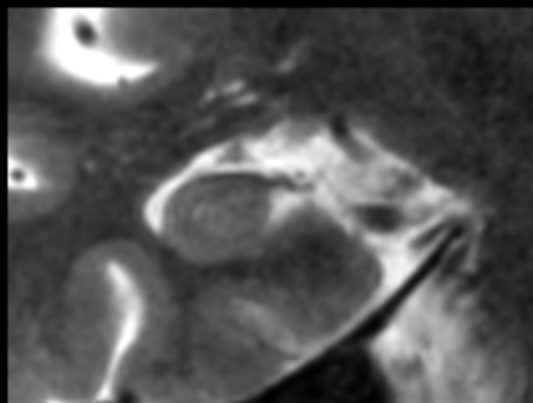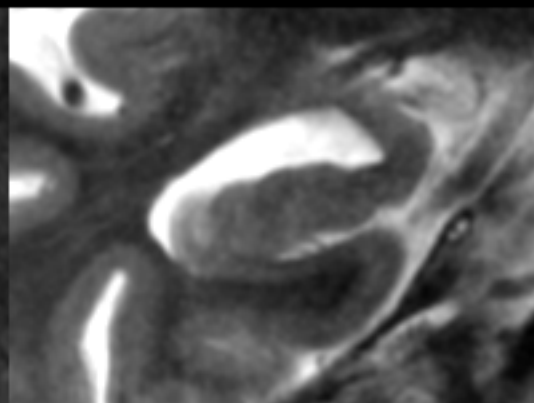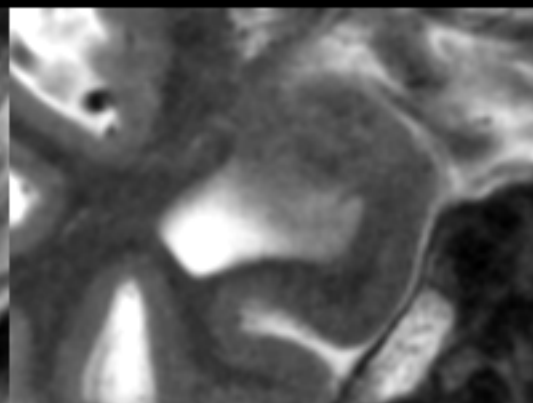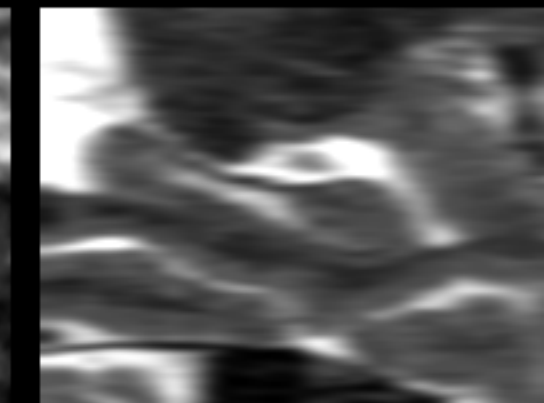

hippunfoldT1

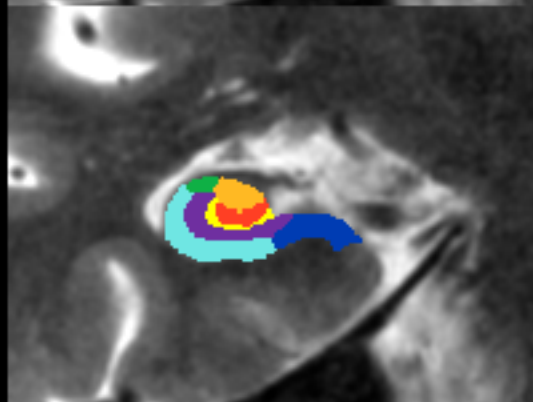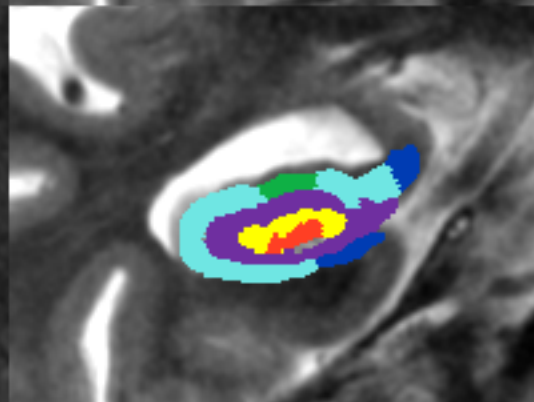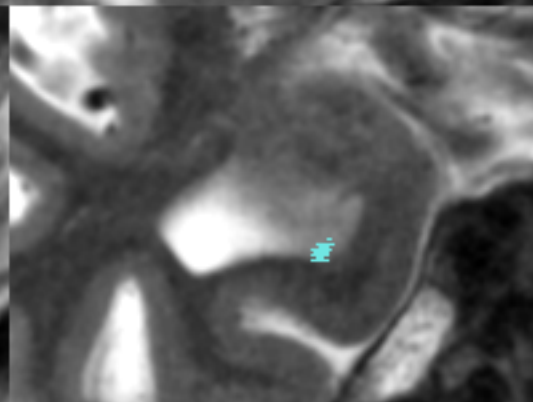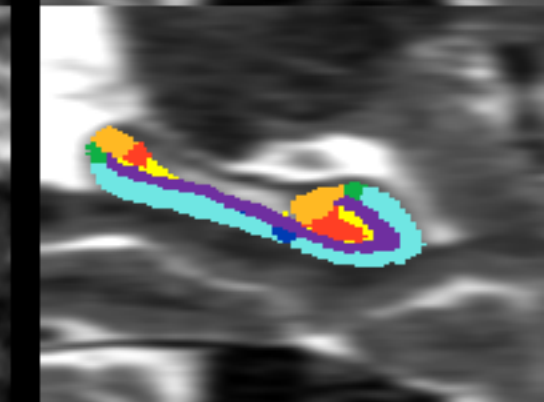

ashs

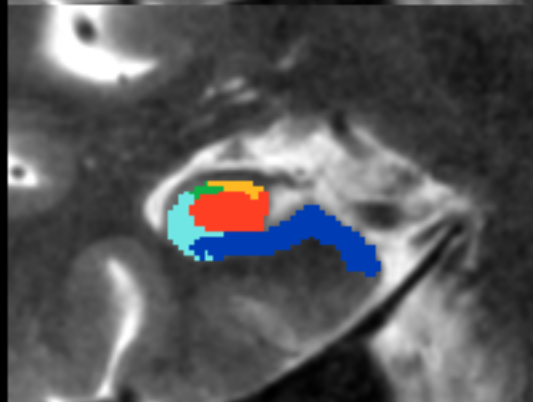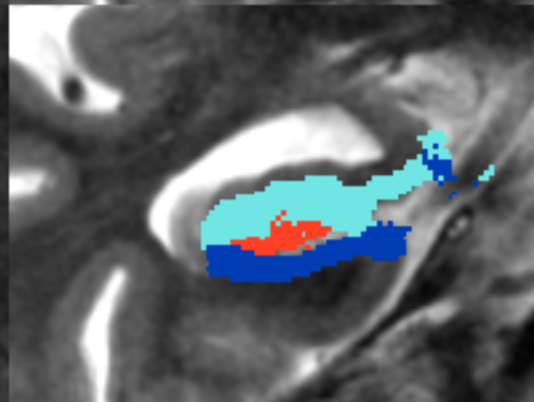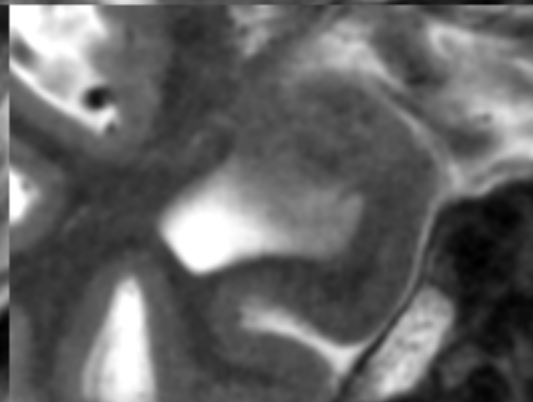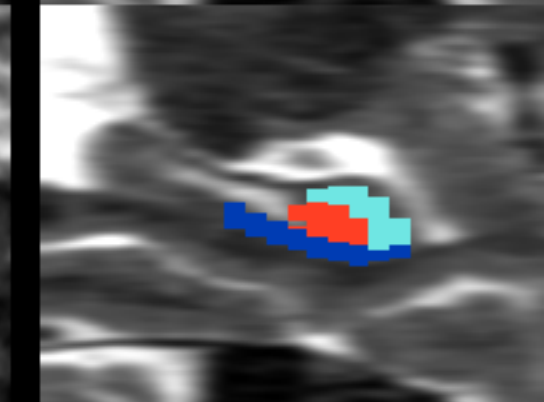

freesurfer

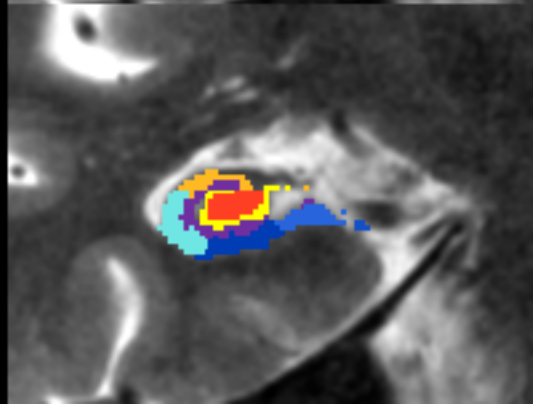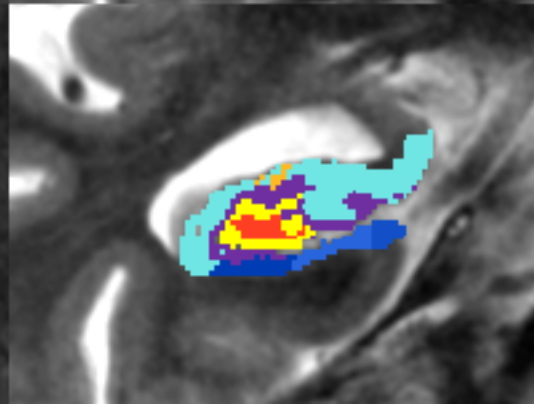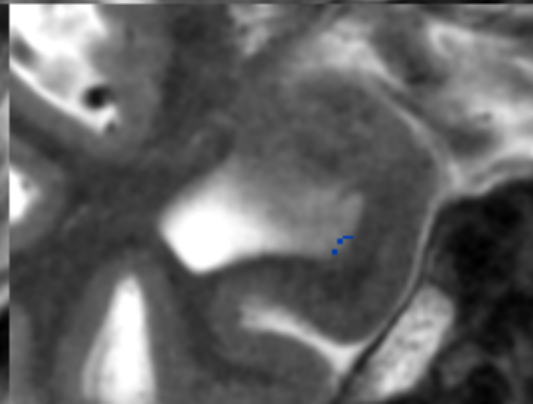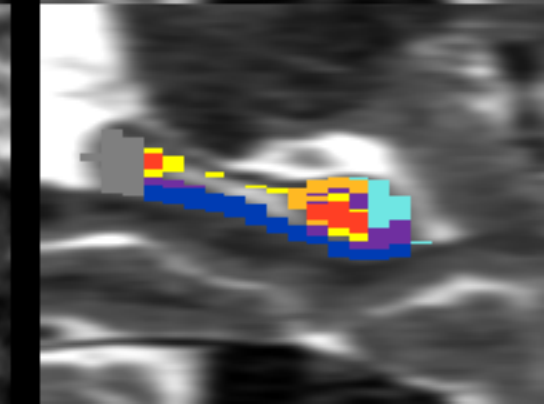

hemi=R,subject=7625176

MRI

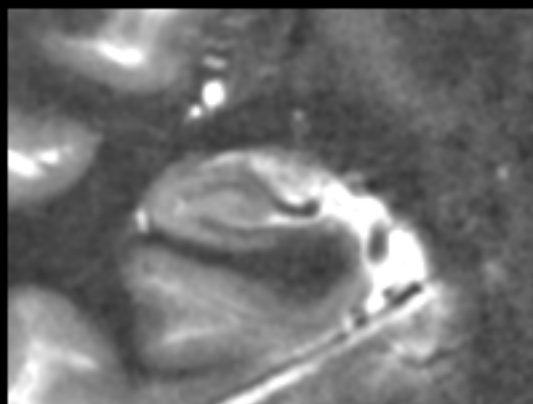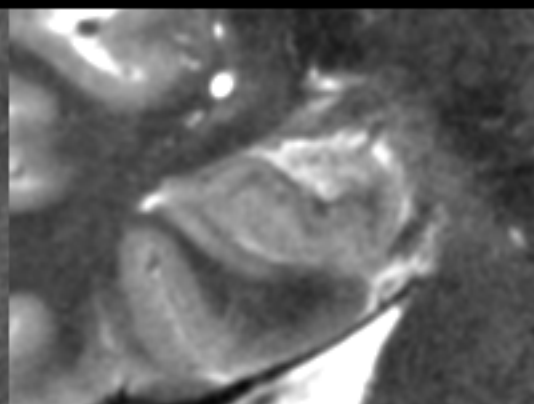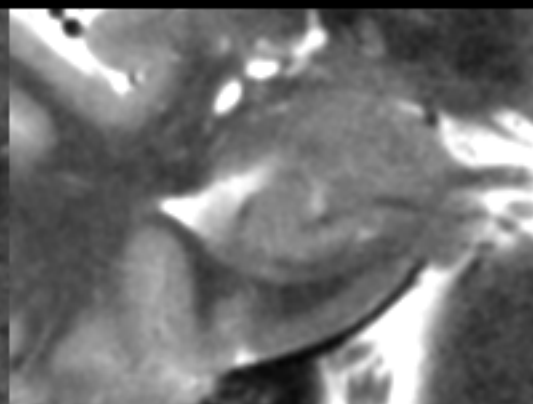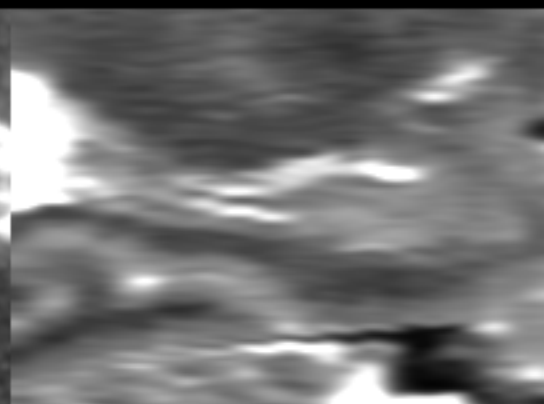

hippunfoldT1

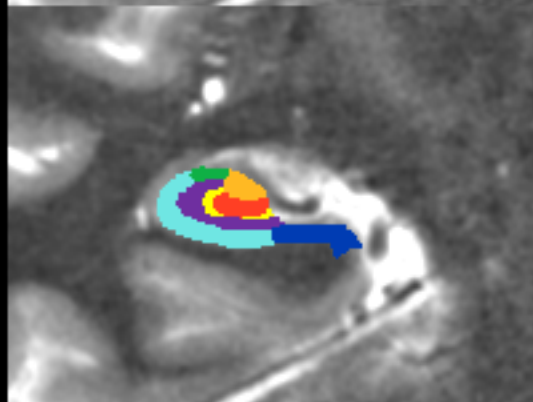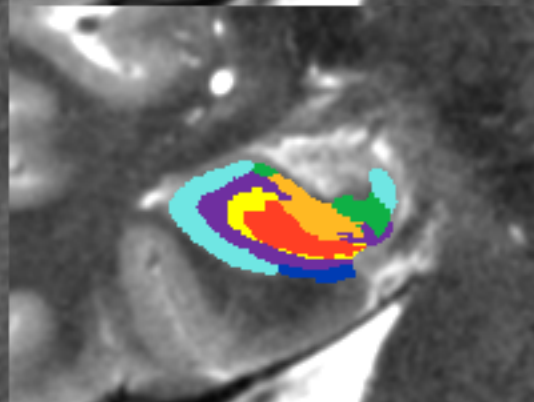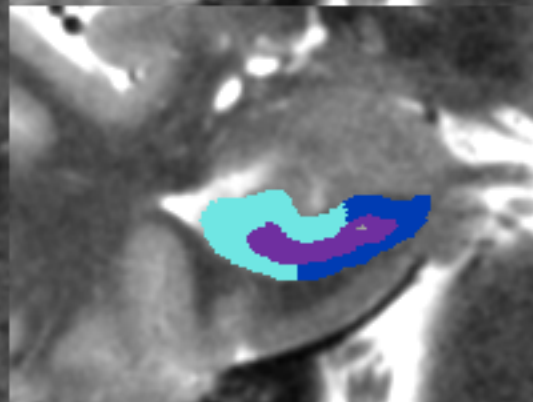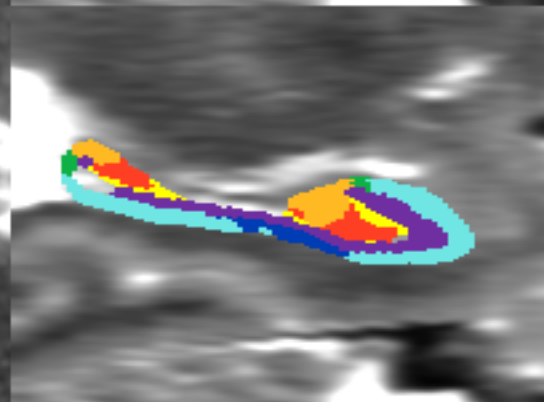

ashs

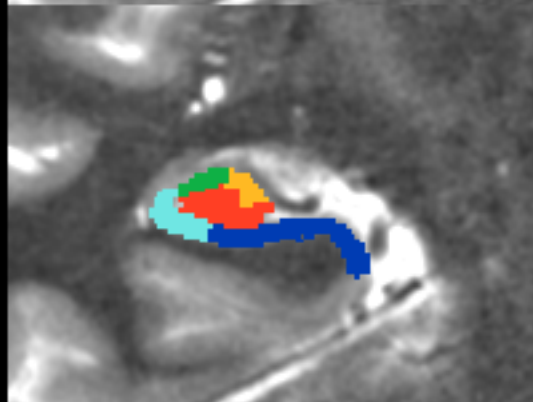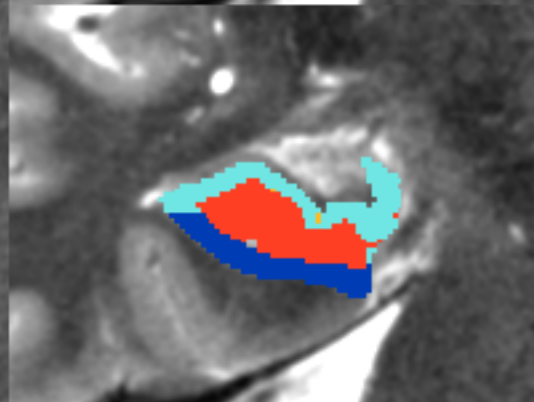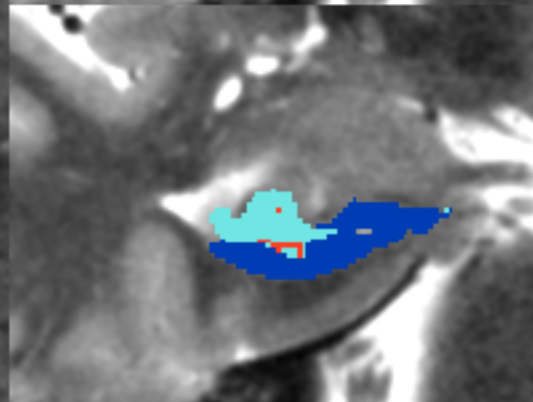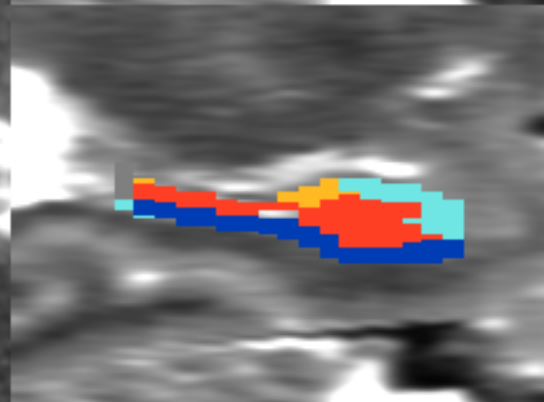

freesurfer

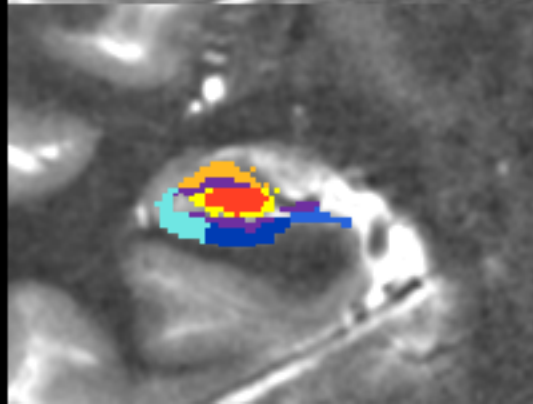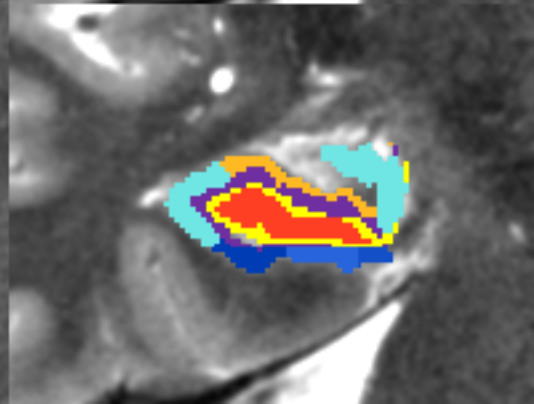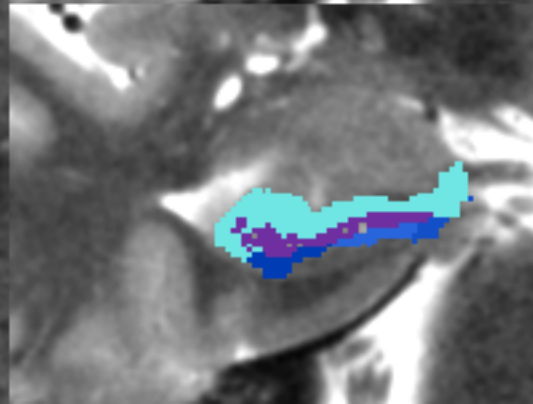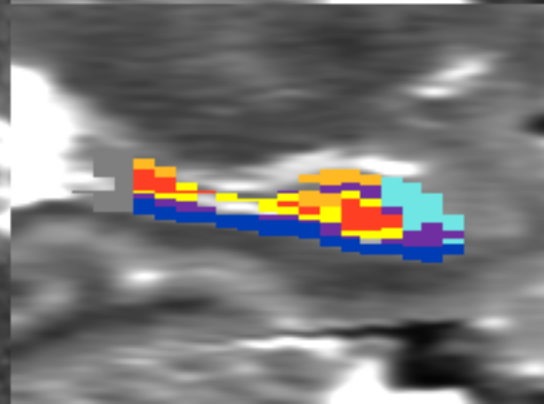



hemi=R,subject=7627786

MRI

hippunfoldT1

ashs

freesurfer

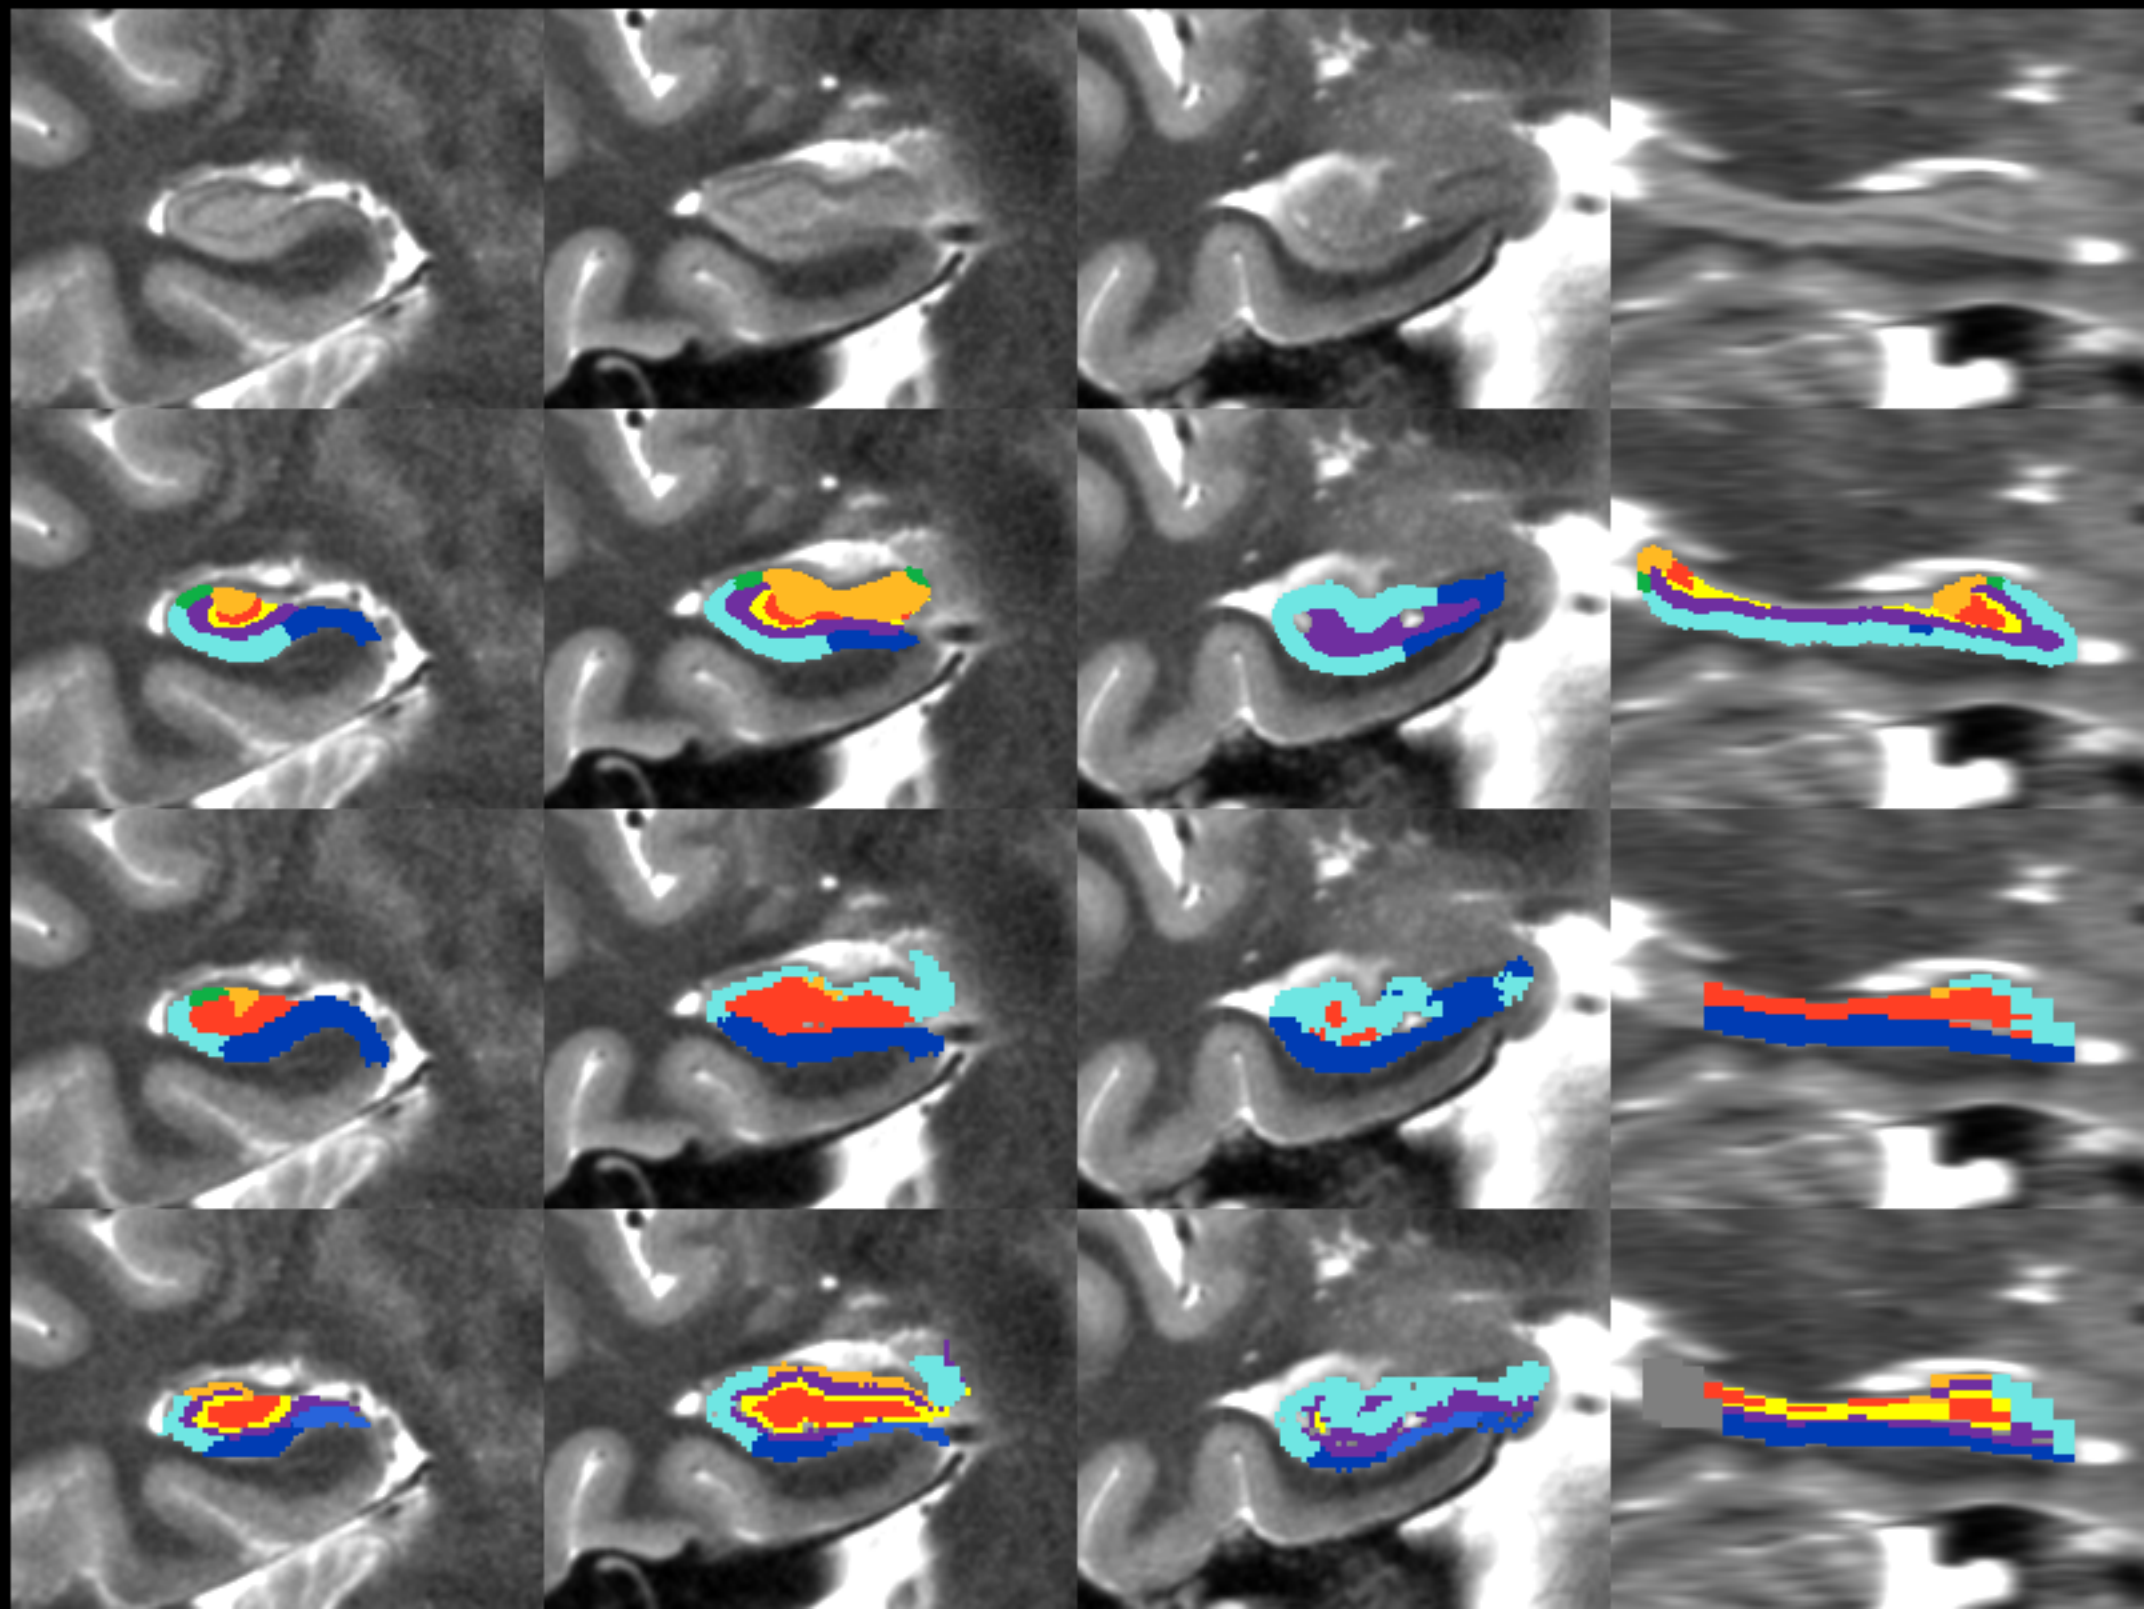

hemi=R,subject=7651278

MRI

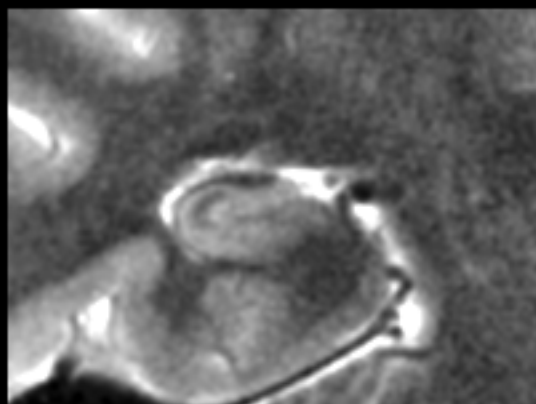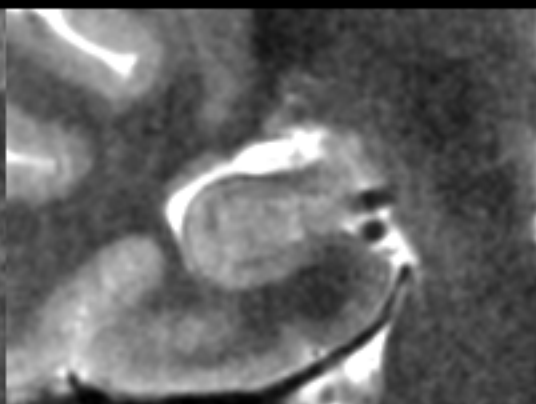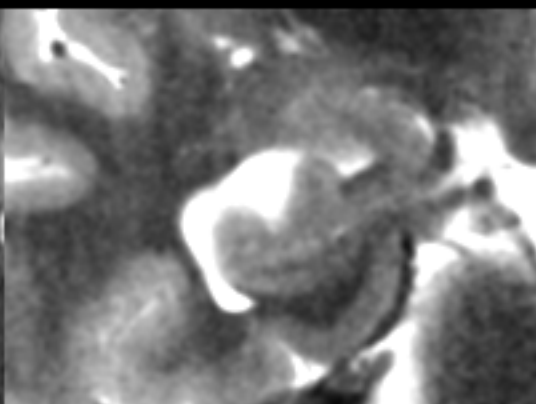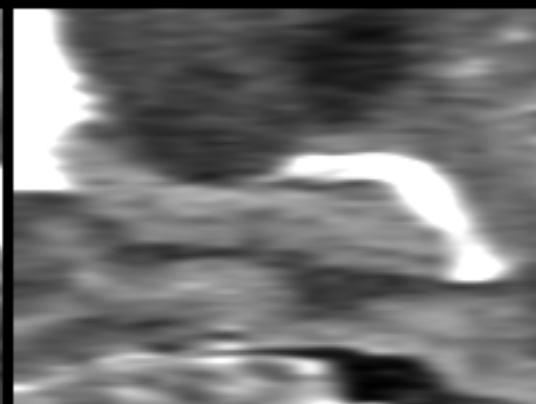

hippunfoldT1

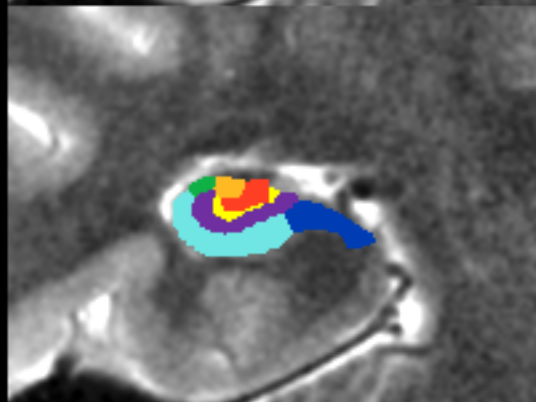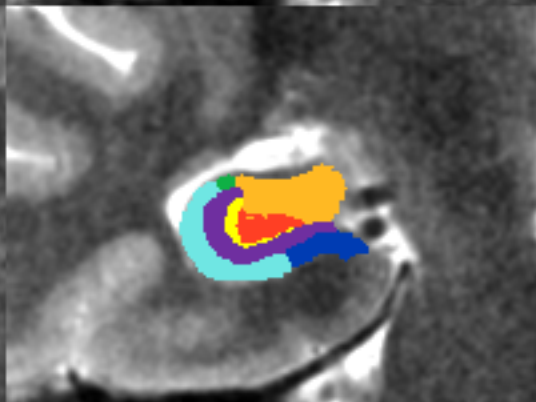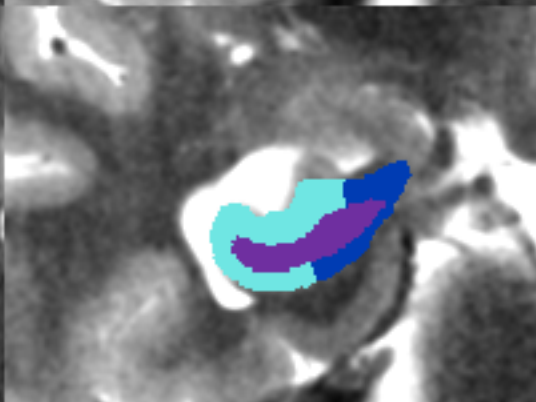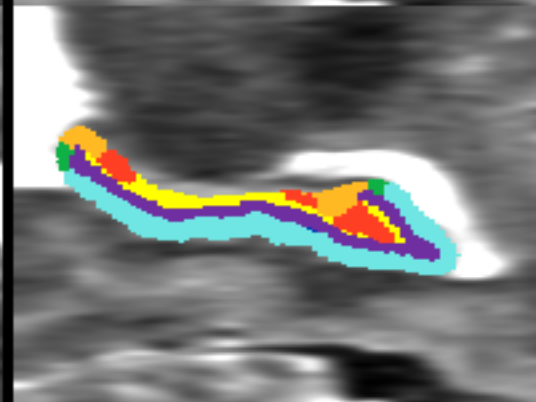

ashs

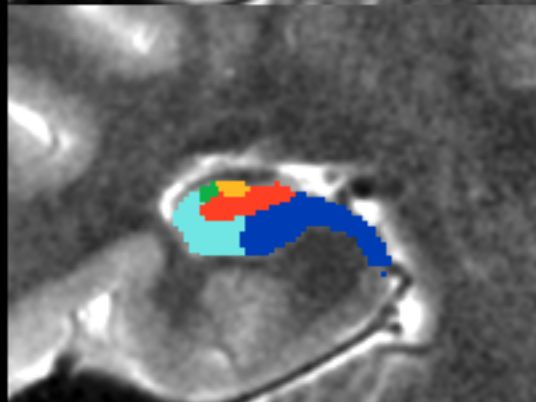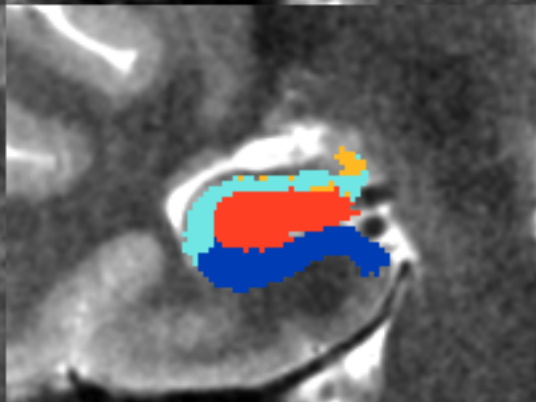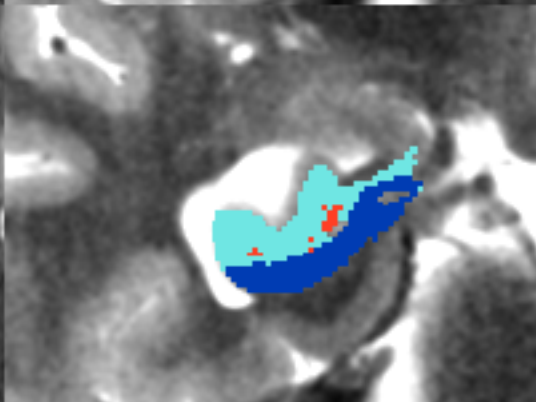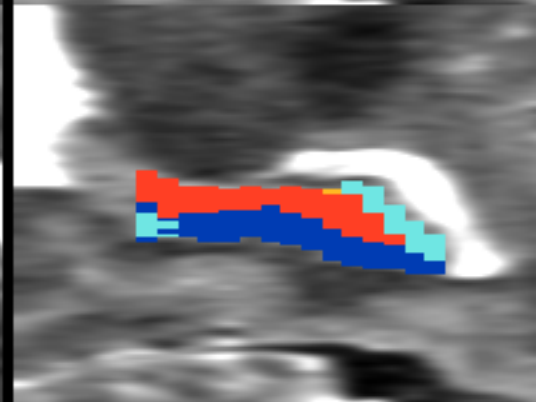

freesurfer

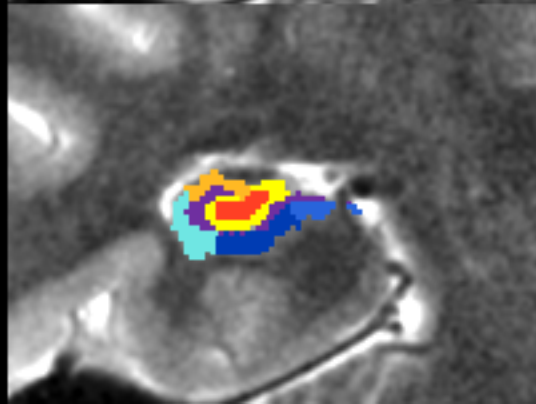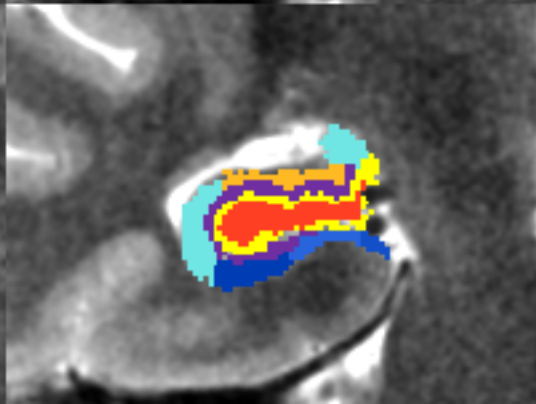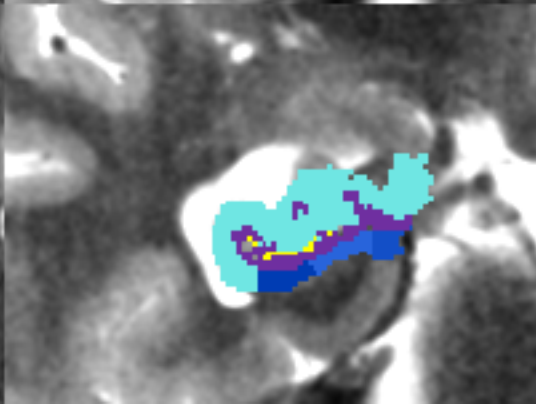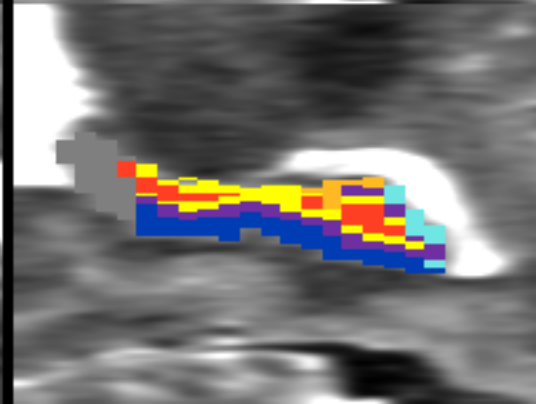

hemi=R,subject=7670989

MRI

hippunfoldT1

ashes

freesurfer

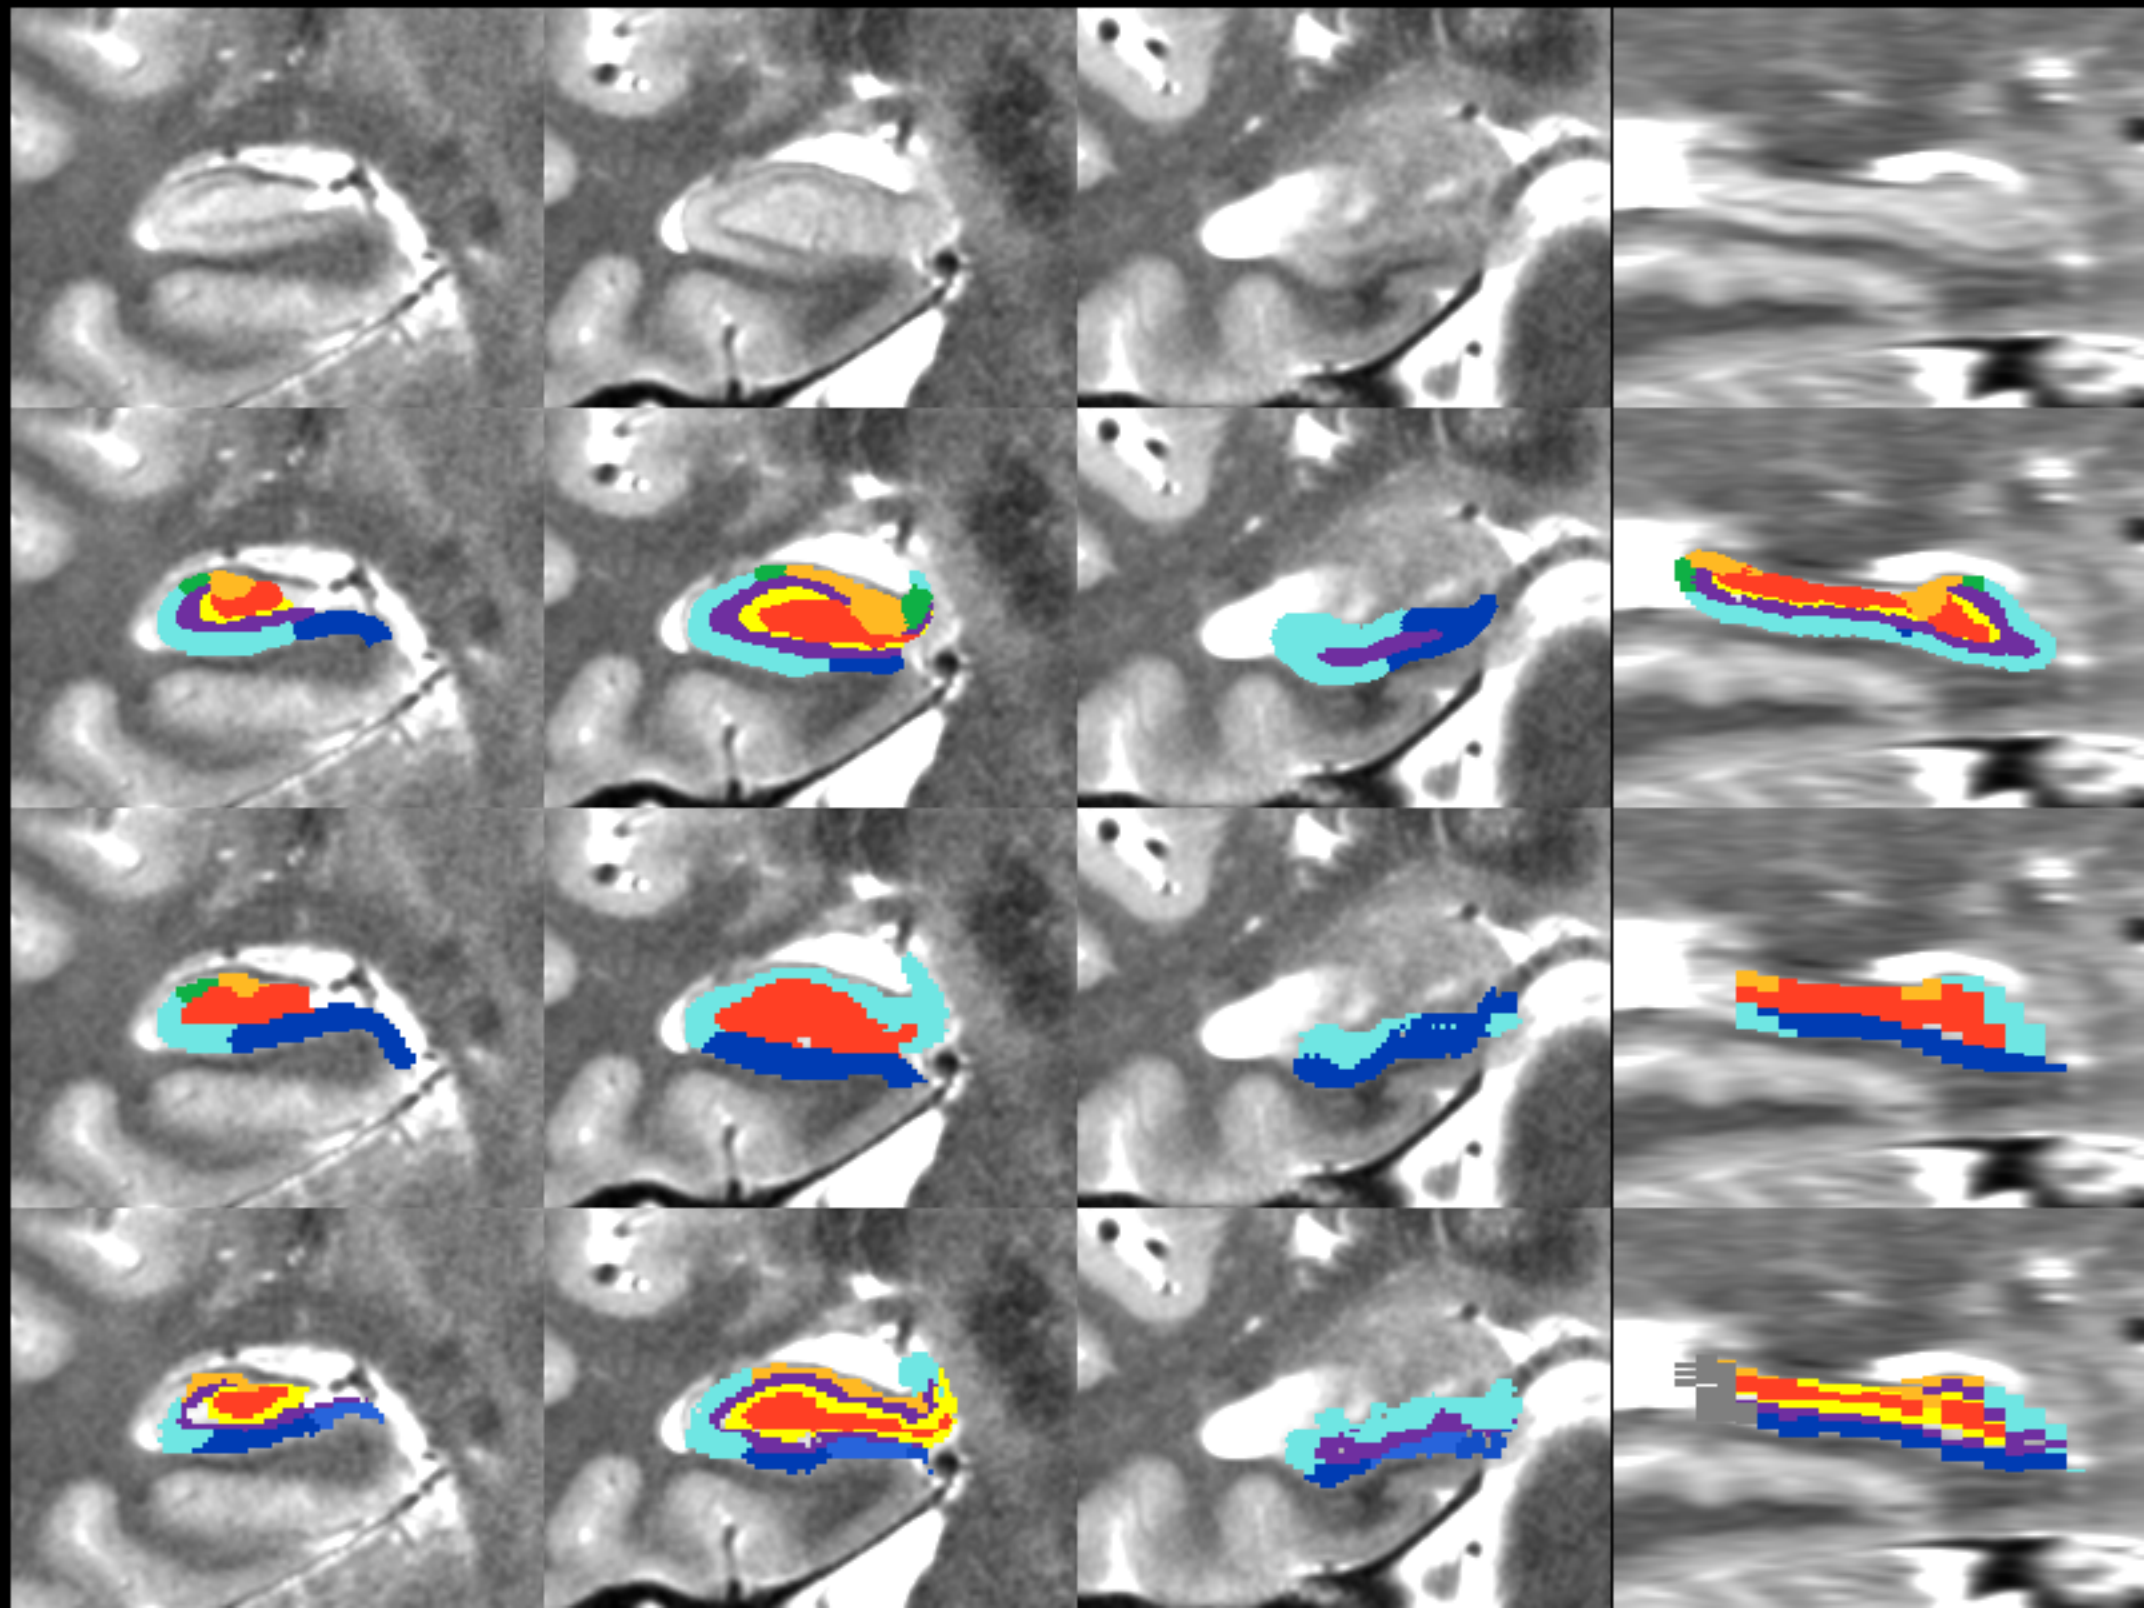

hemi=R,subject=7698204

MRI

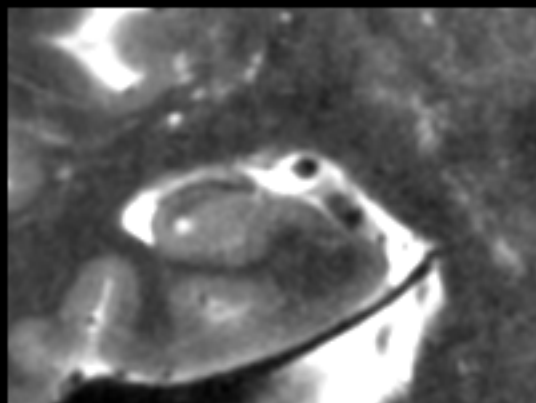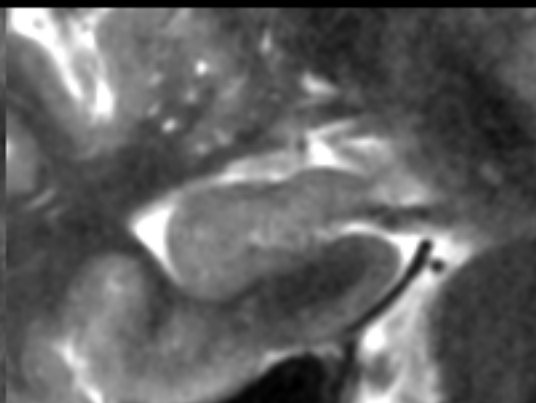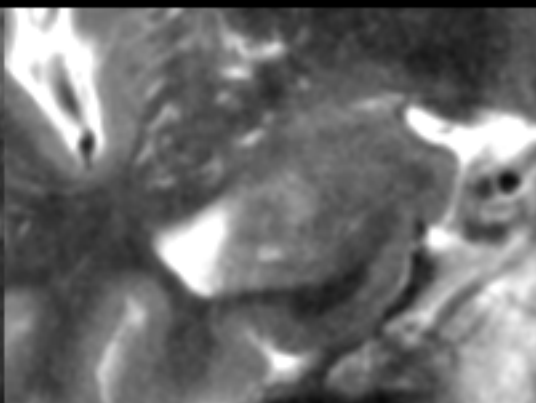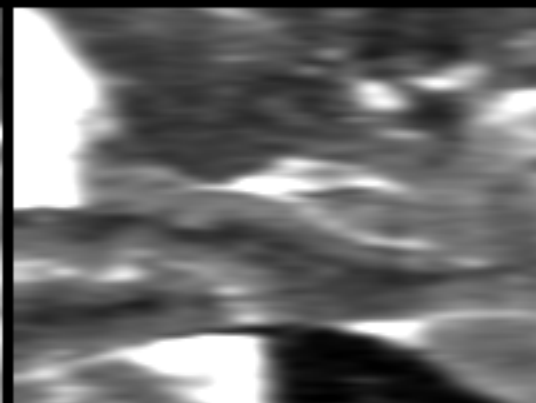

hippunfoldT1

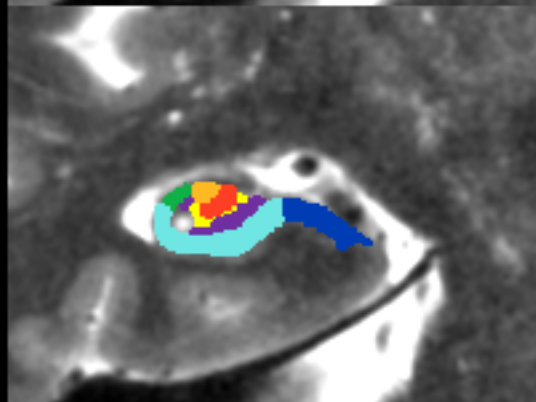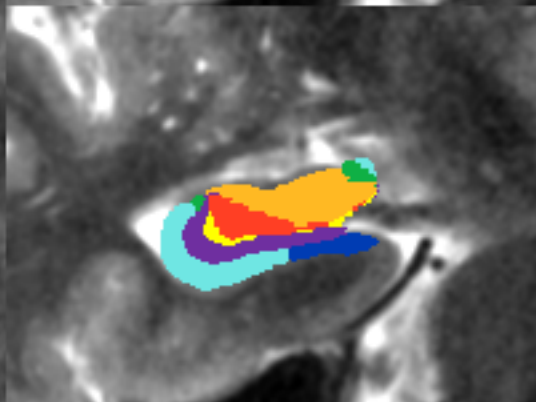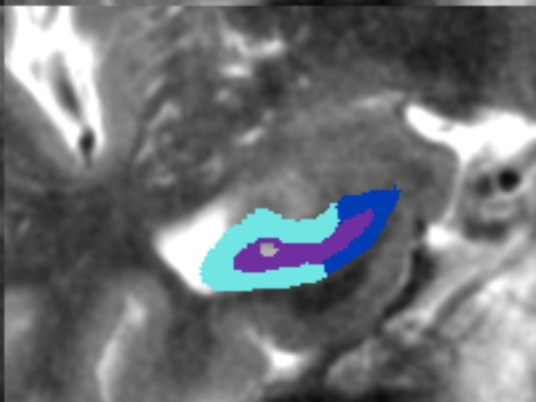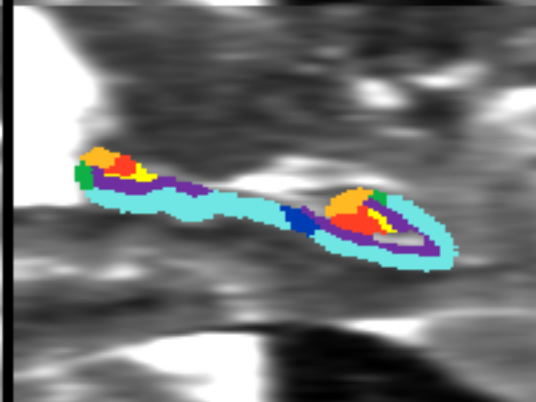

ashs

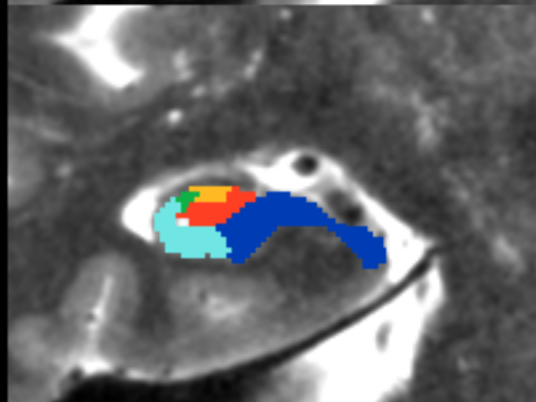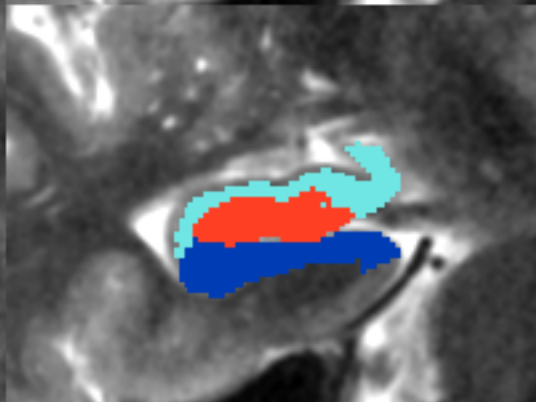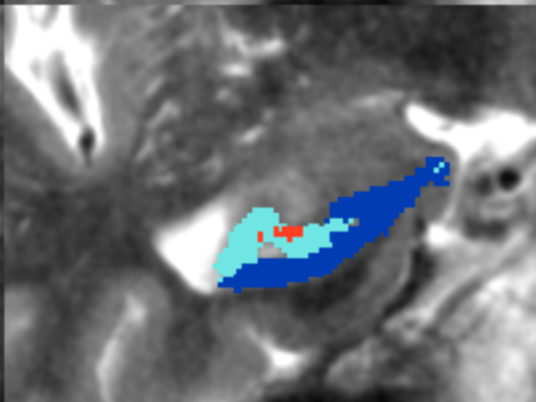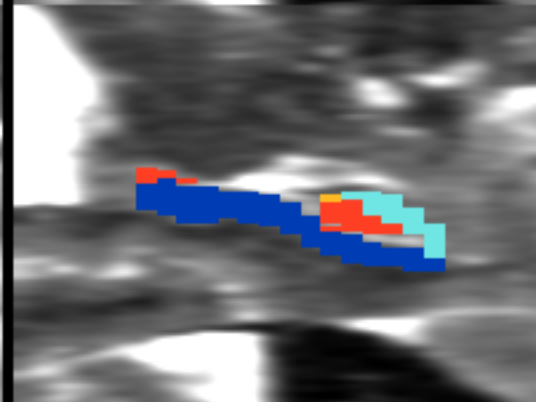

freesurfer

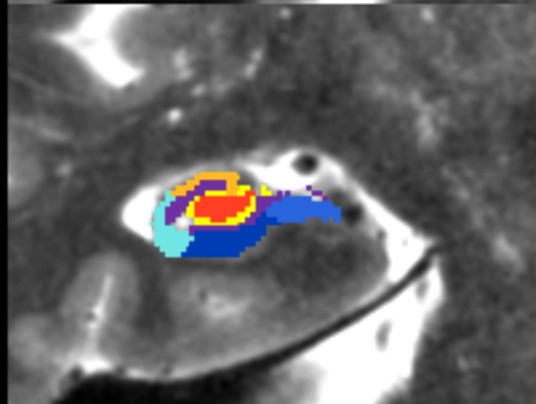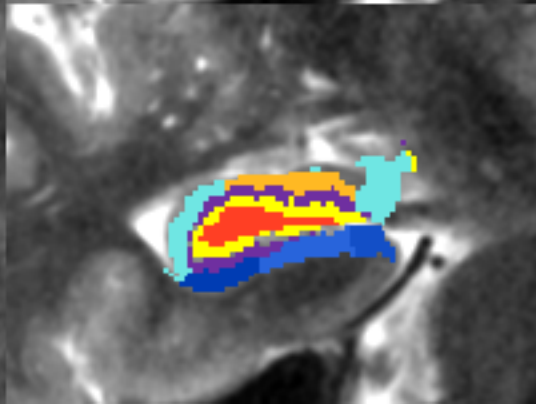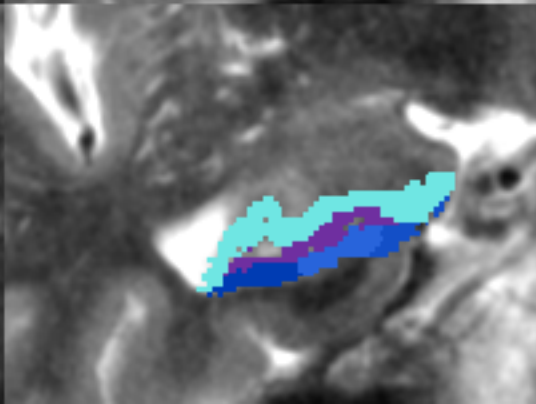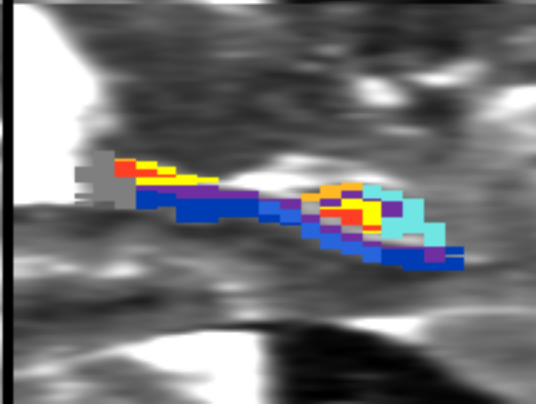

hemi=R,subject=7716381

MRI

hippunfoldT1

ashes

freesurfer

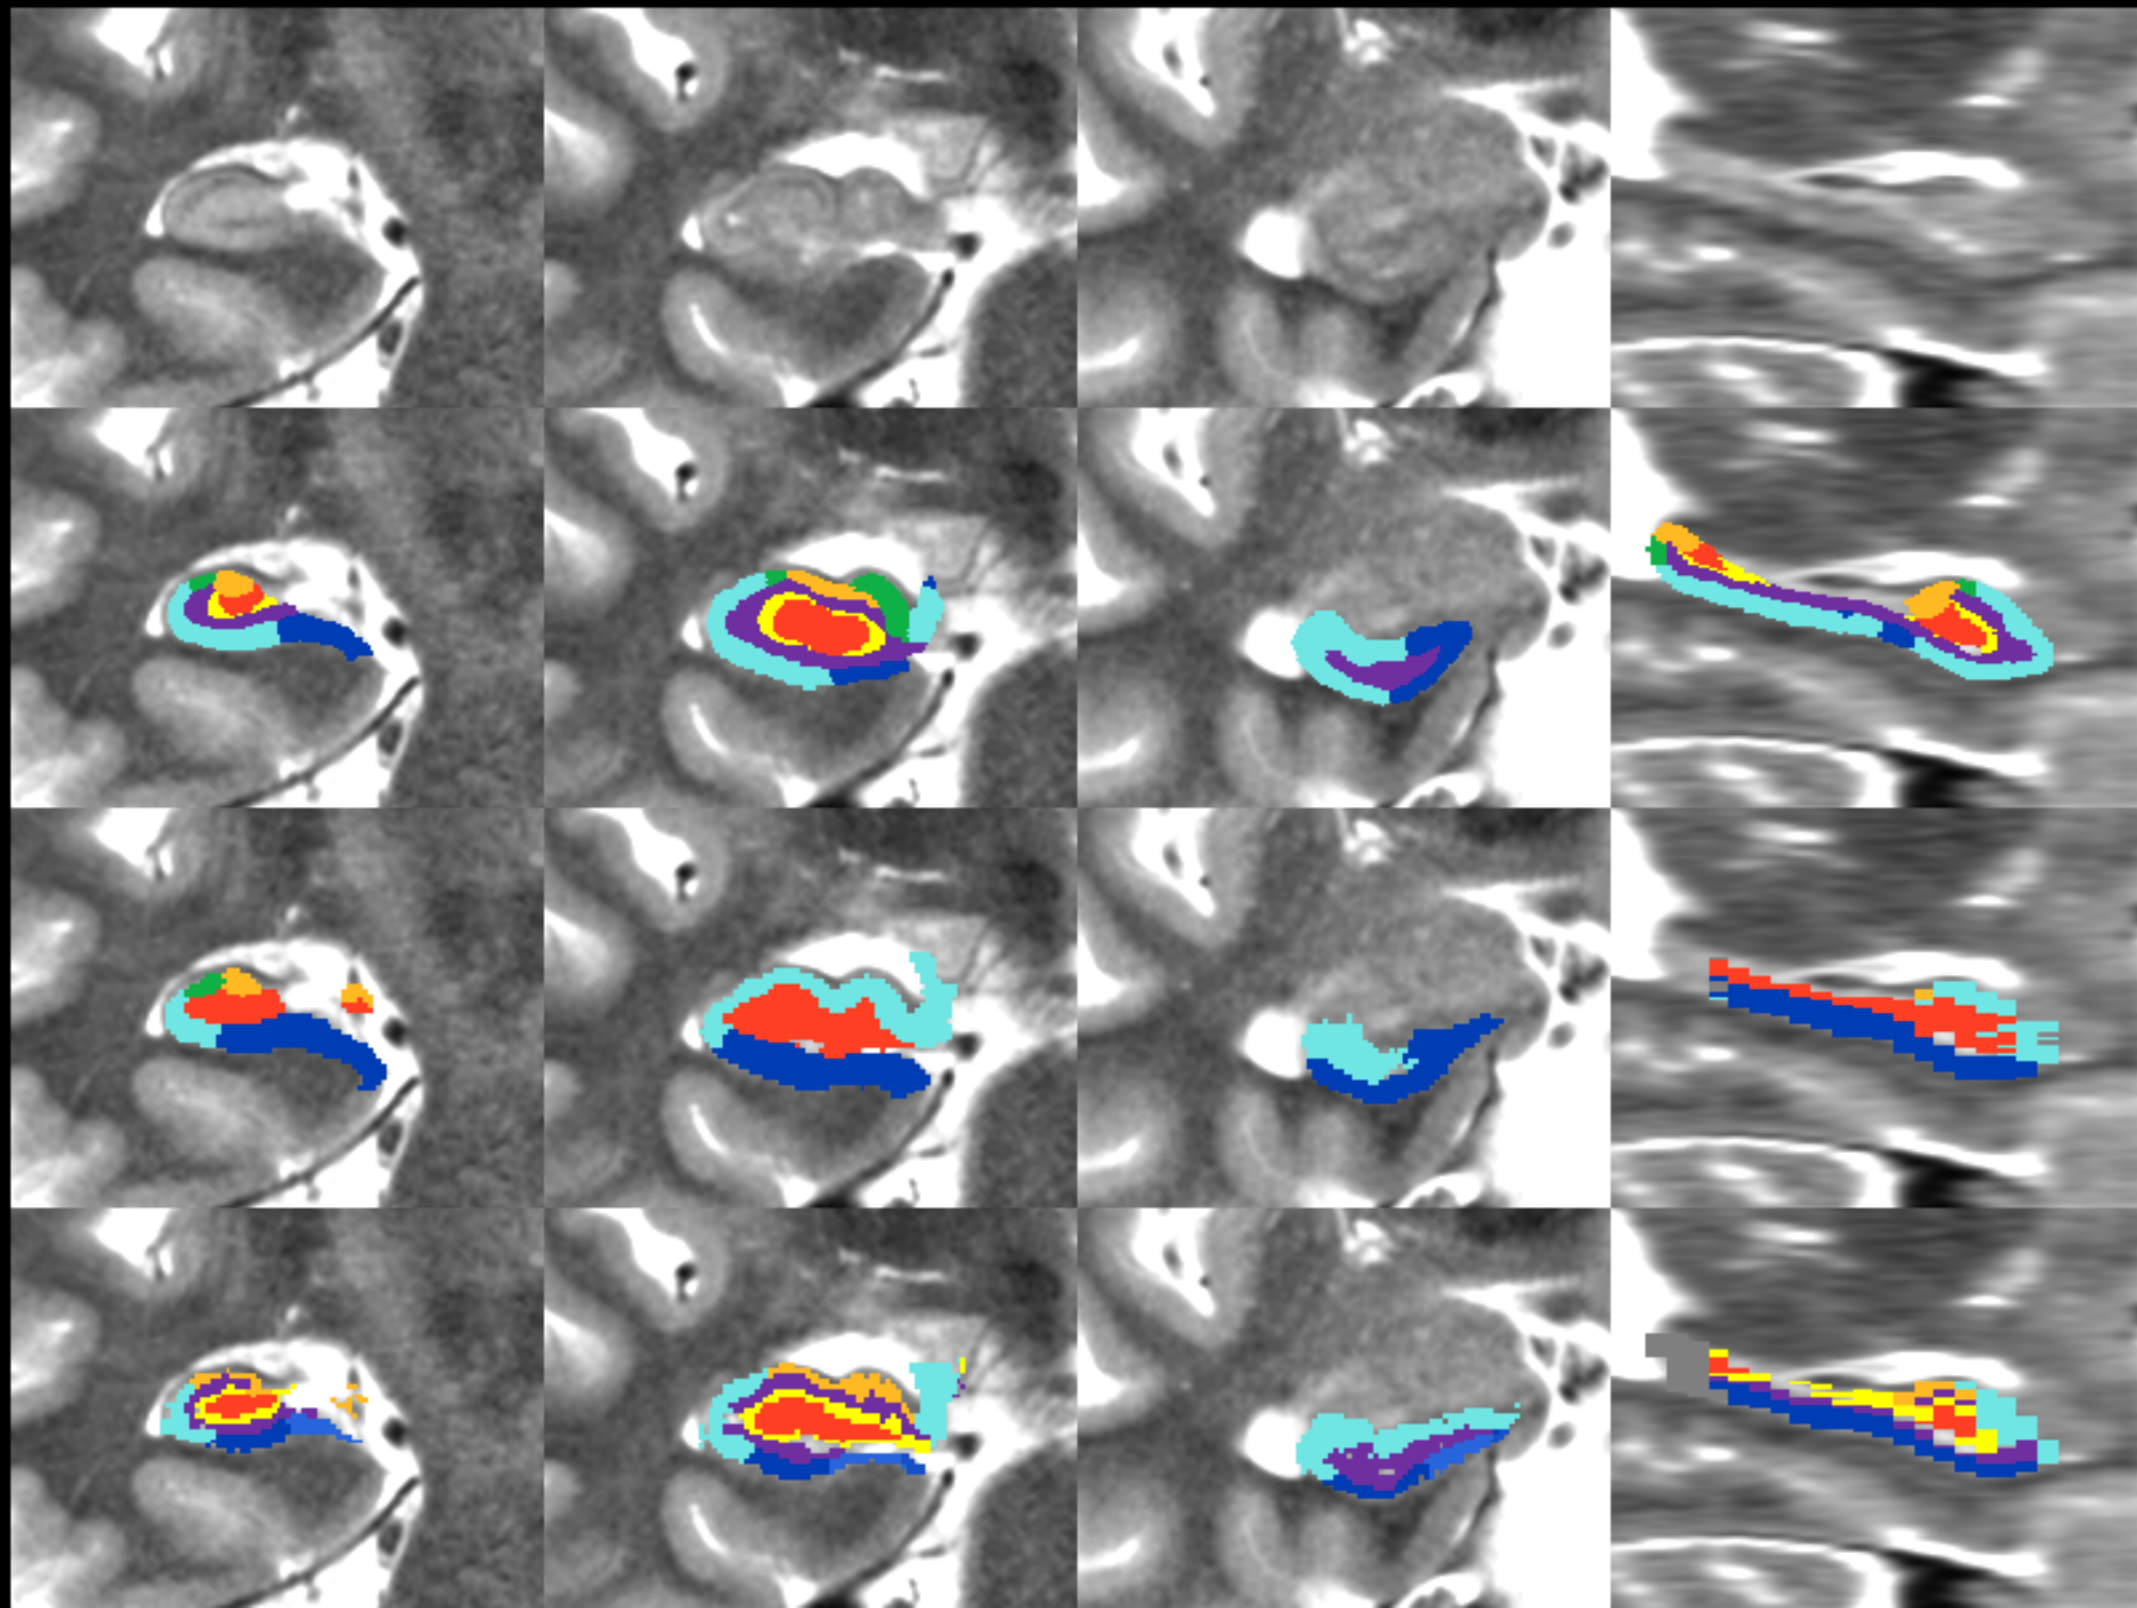

hemi=R,subject=7777200

MRI

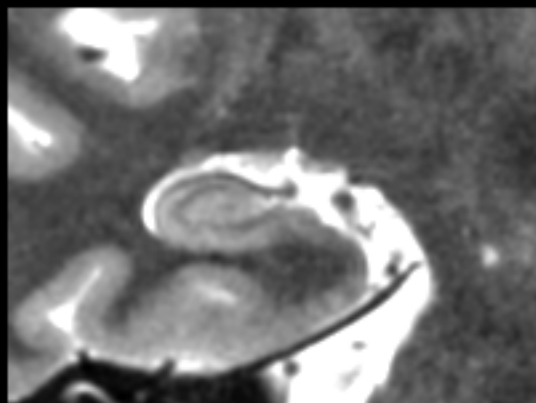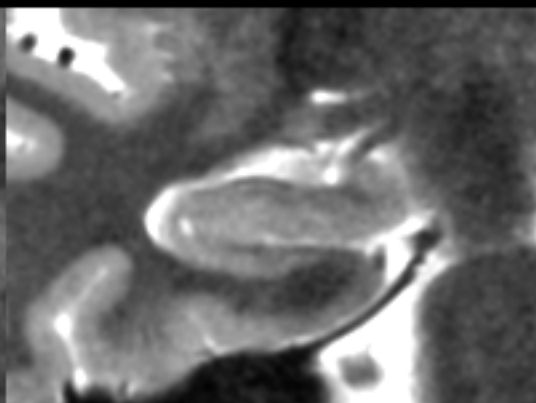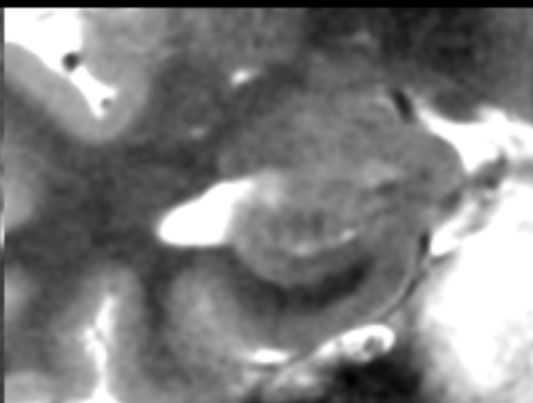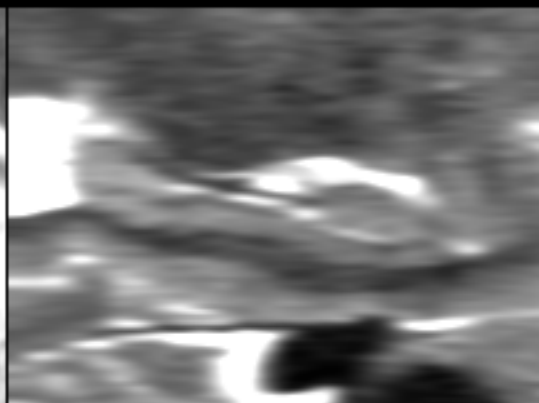

hippunfoldT1

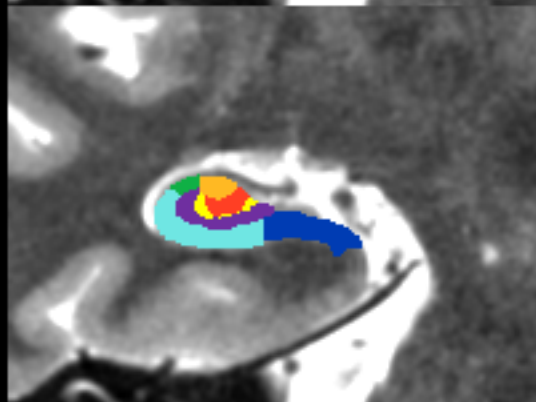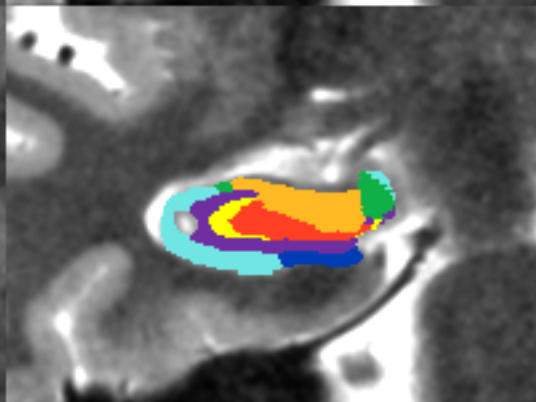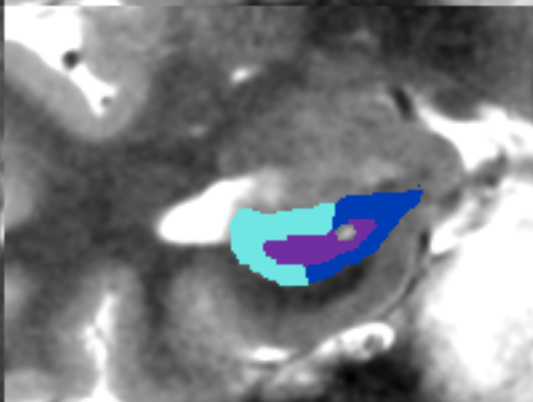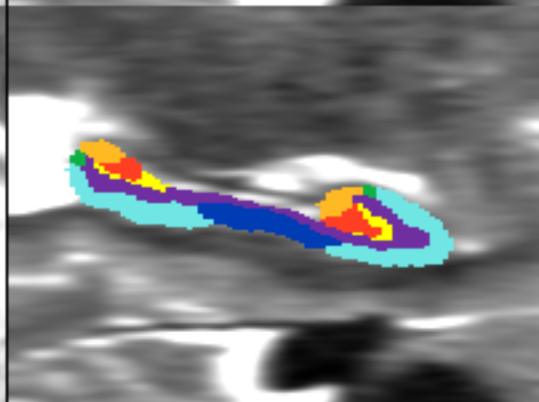

ashs

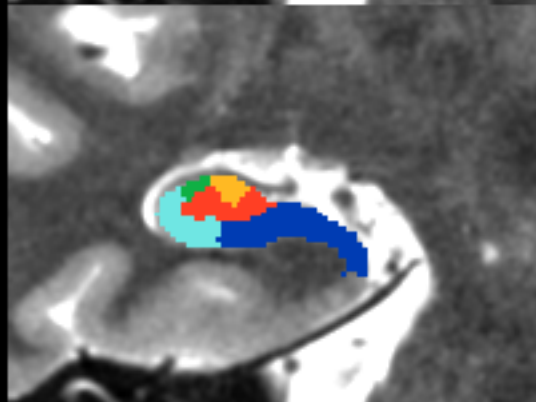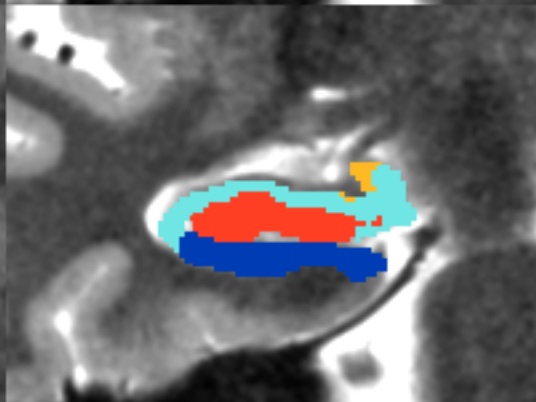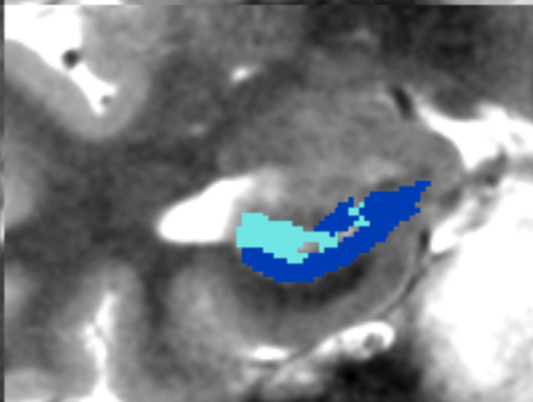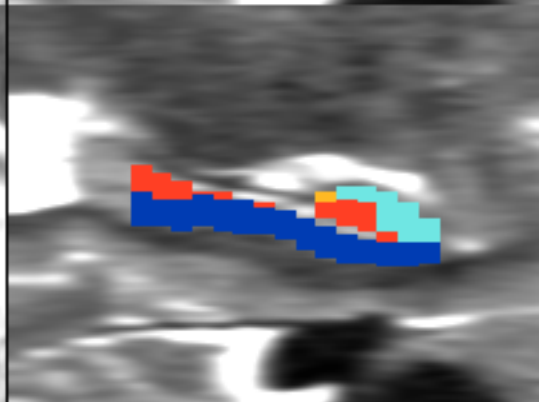

freesurfer

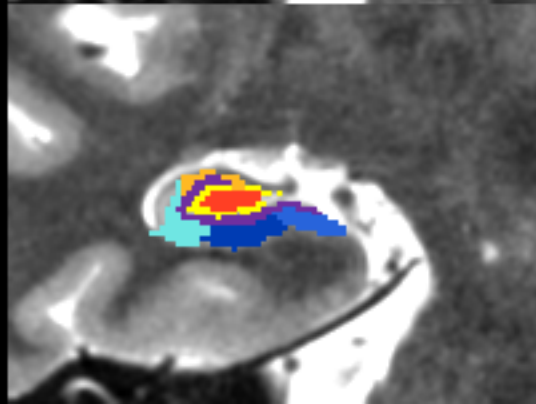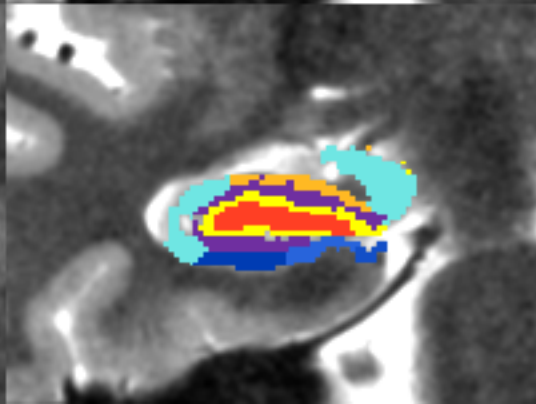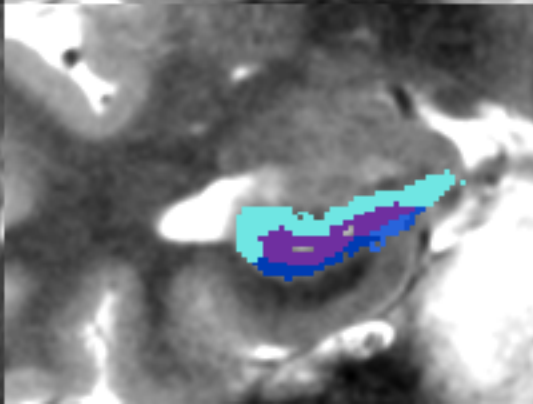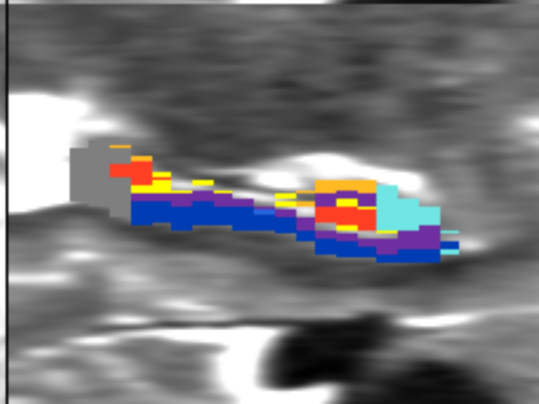

hemi=R,subject=7840988

MRI

hippunfoldT1

ashes

freesurfer

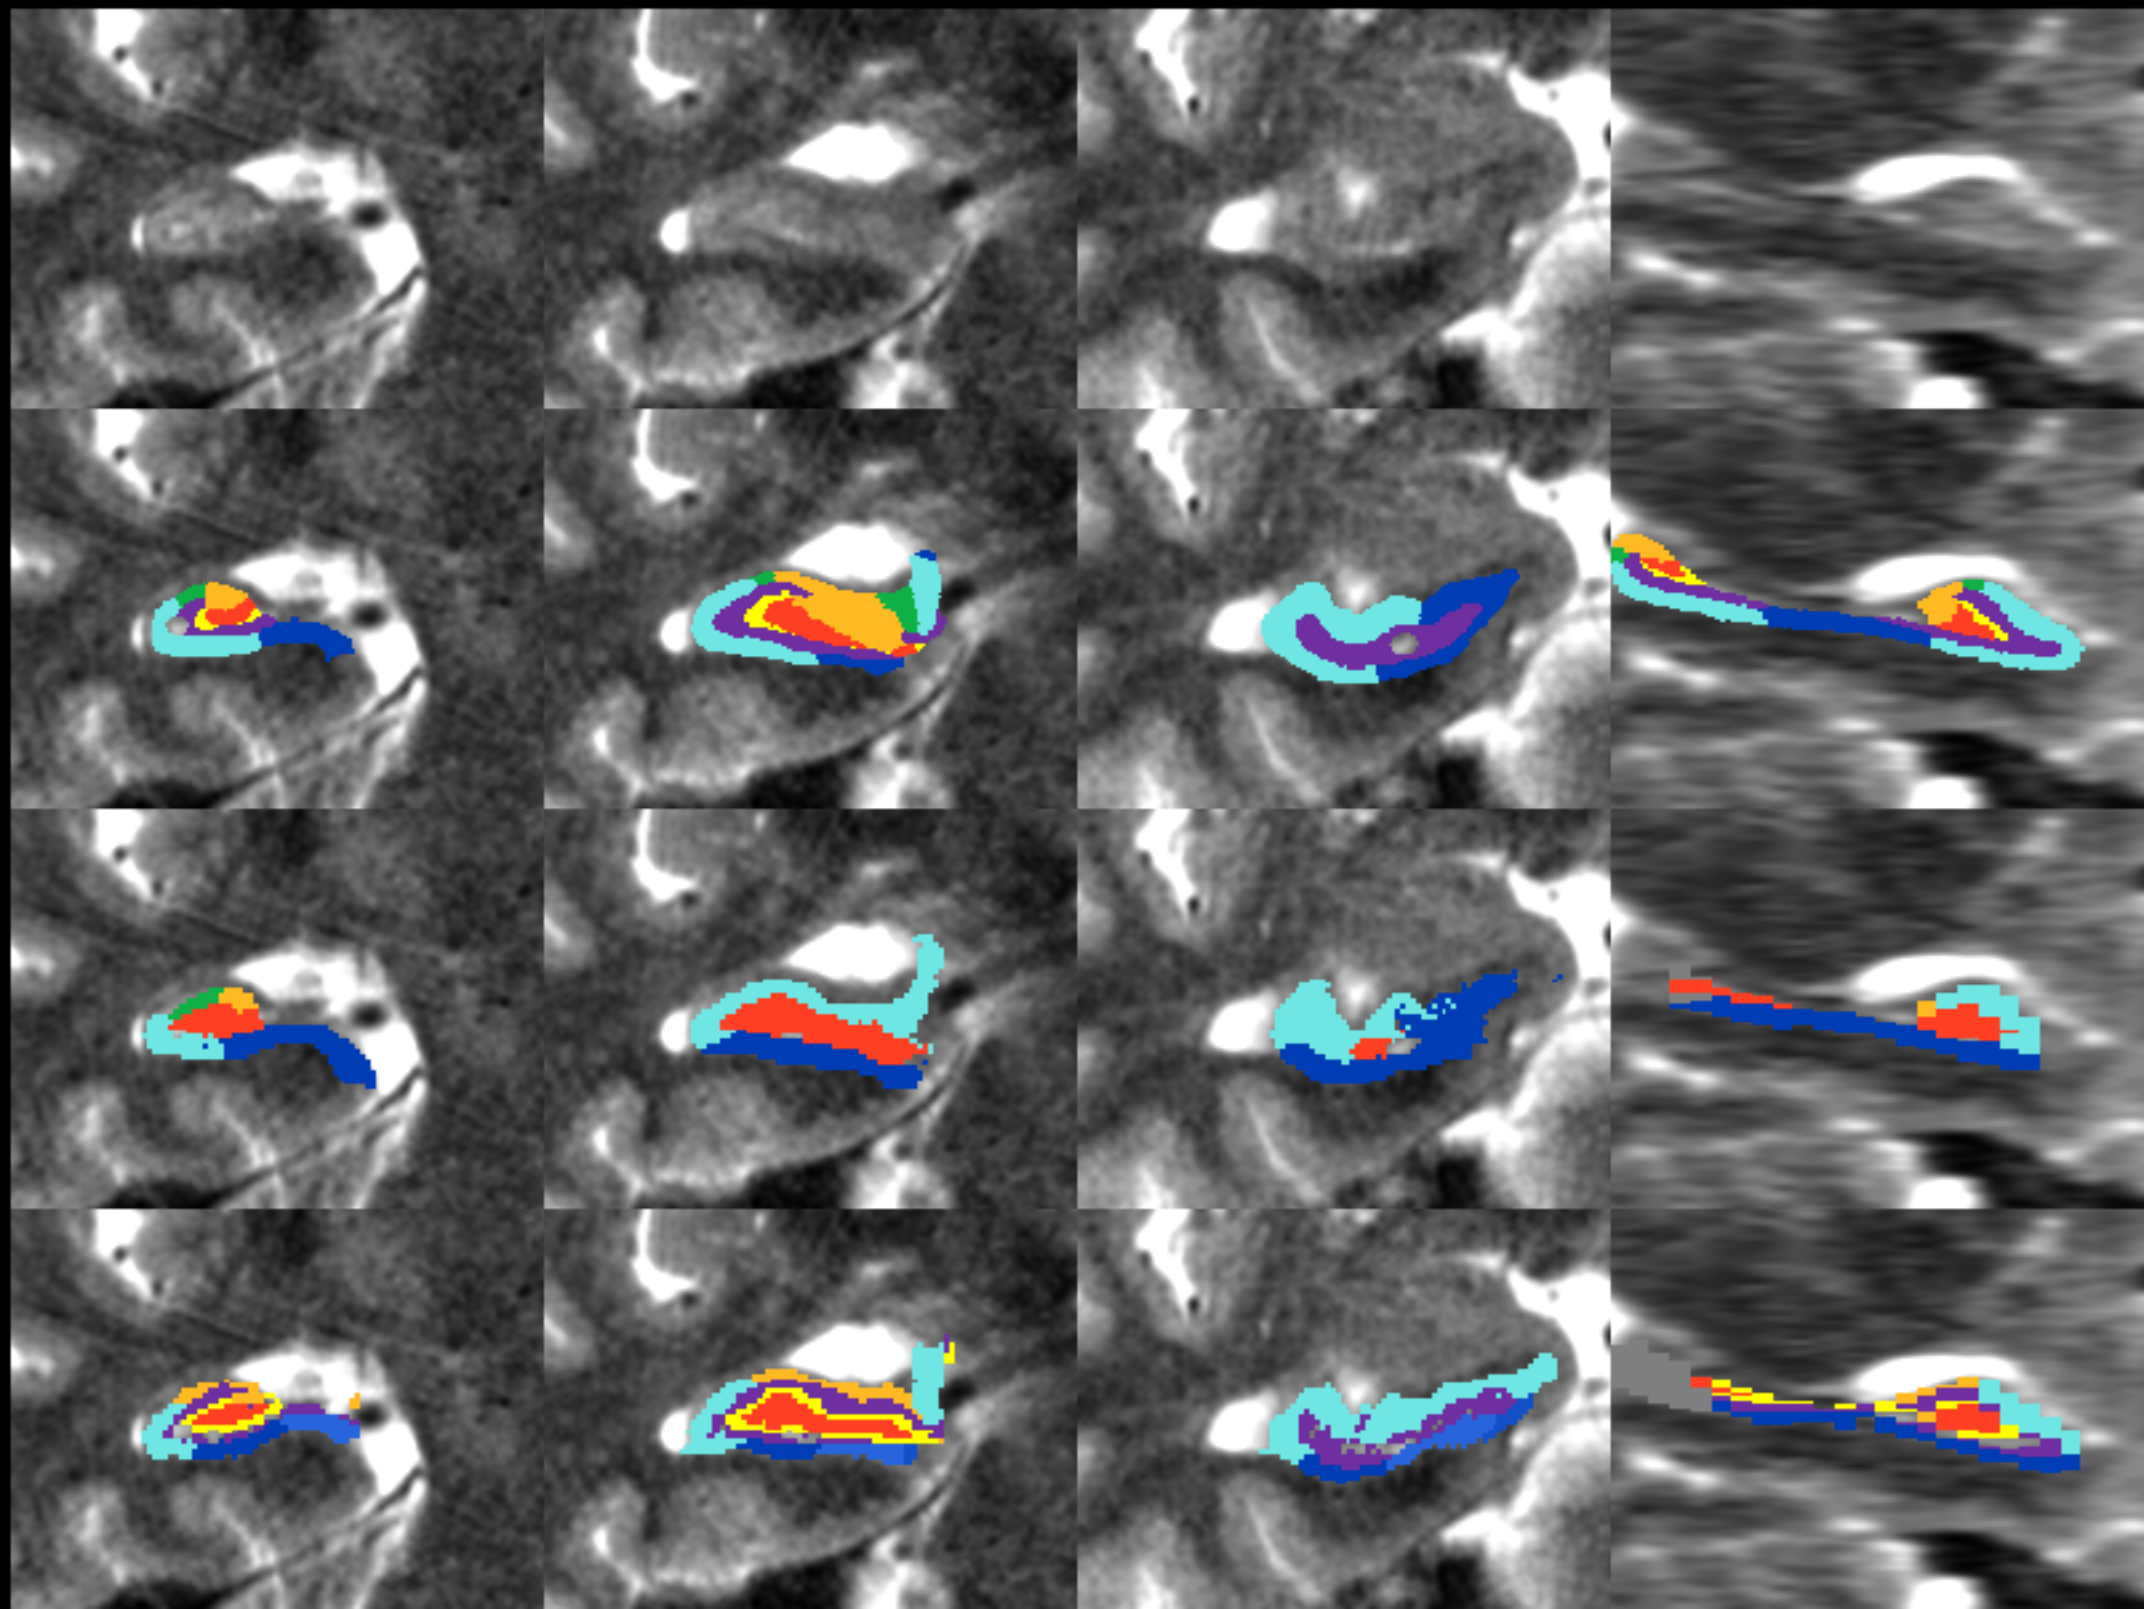

hemi=R,subject=7888815

MRI

hippunfoldT1

ashs

freesurfer

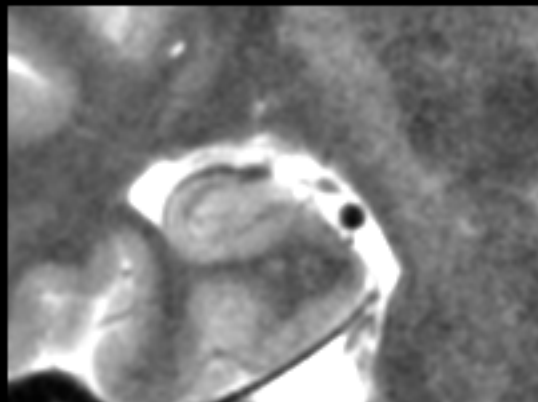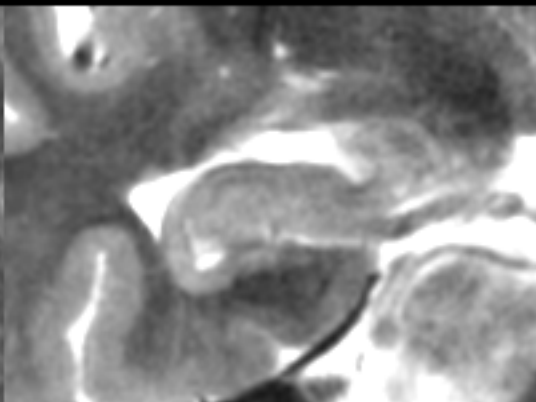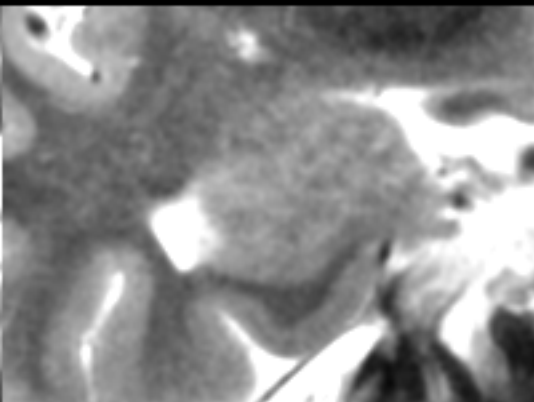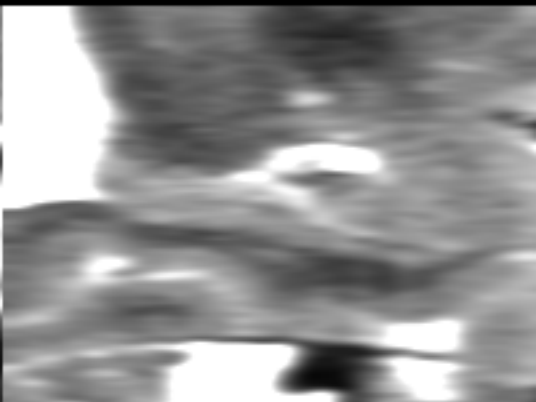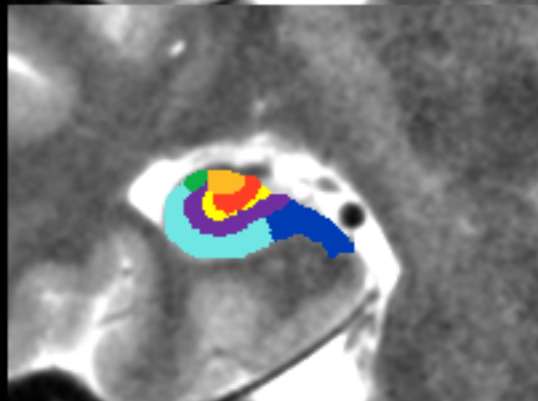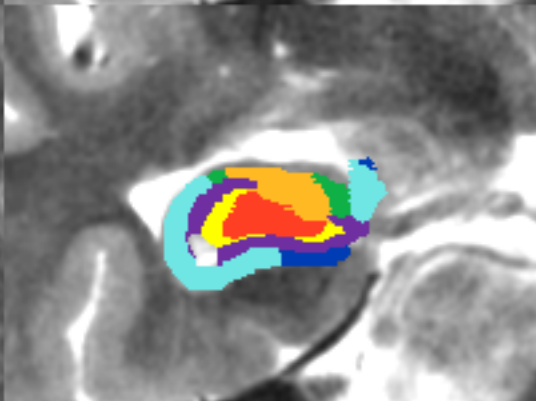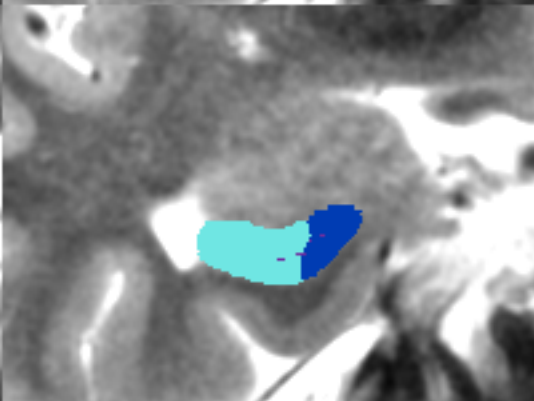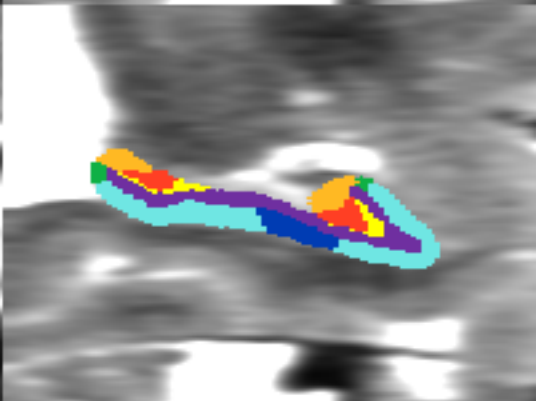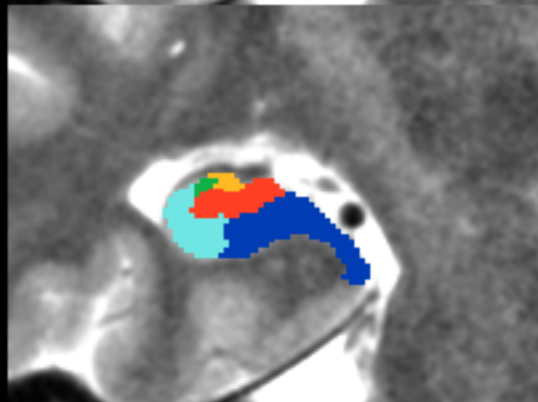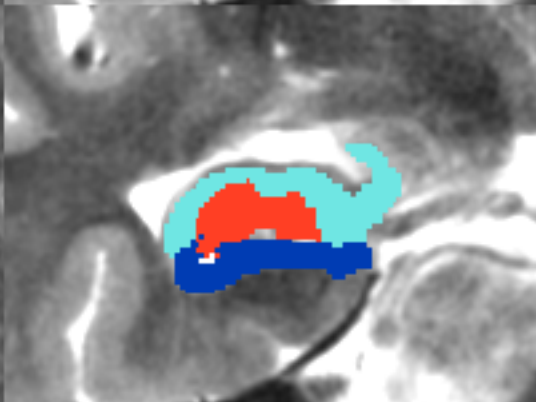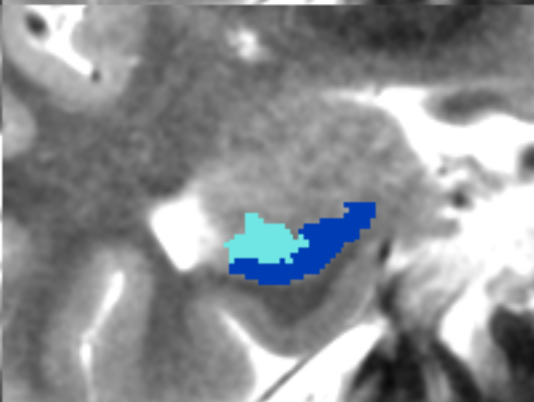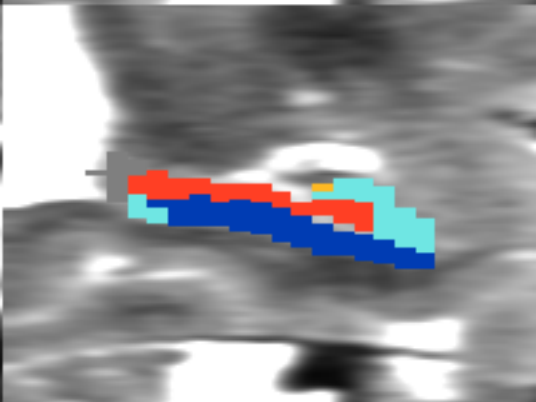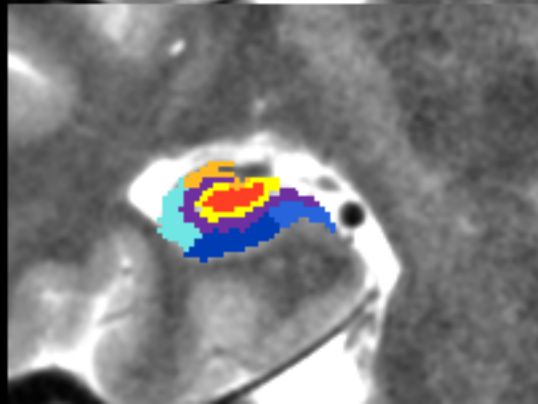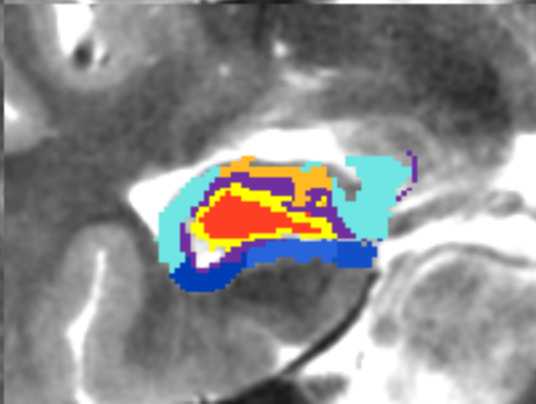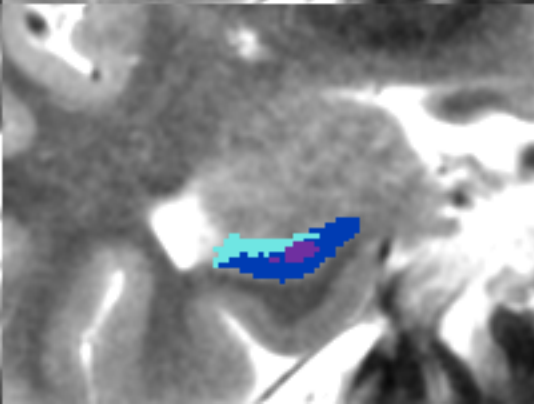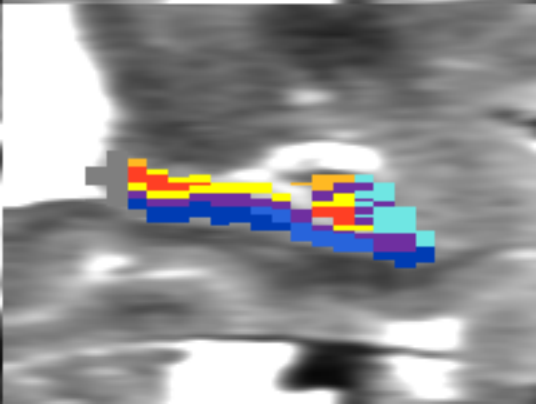



hemi=R,subject=7956199

MRI

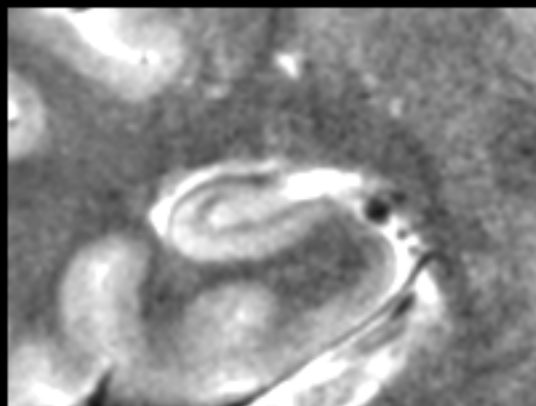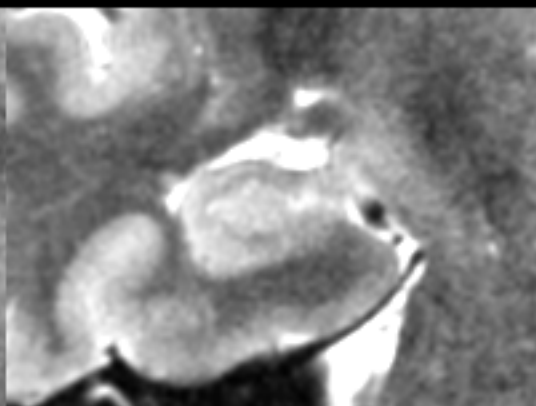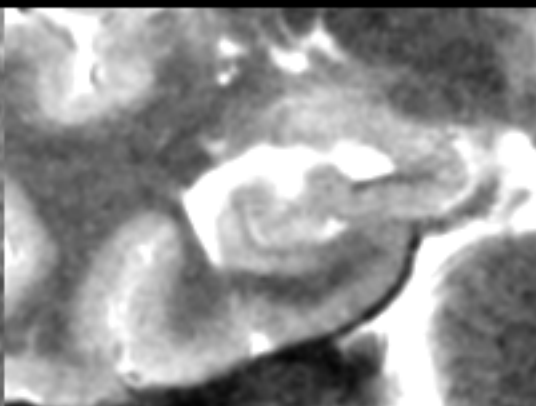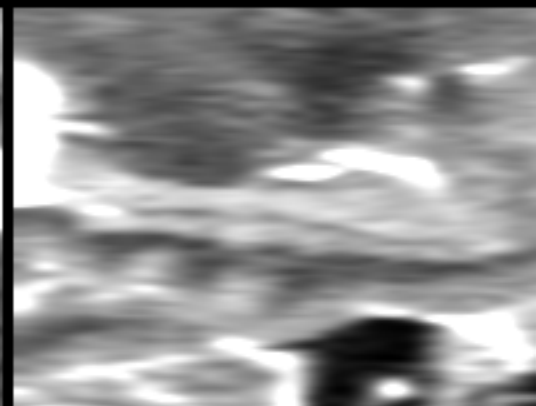

hippunfoldT1

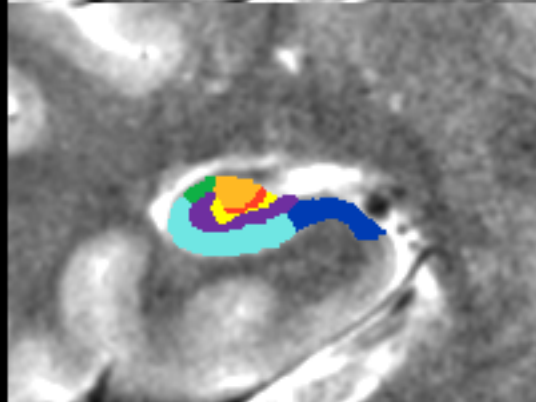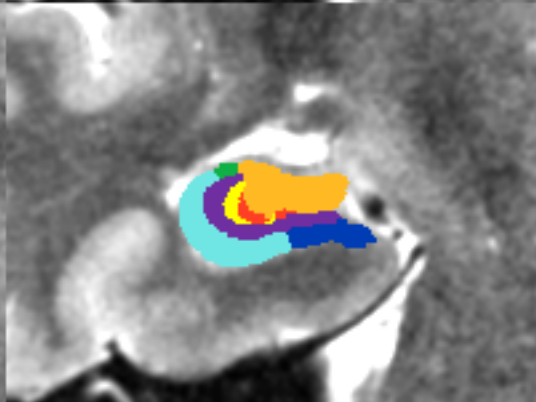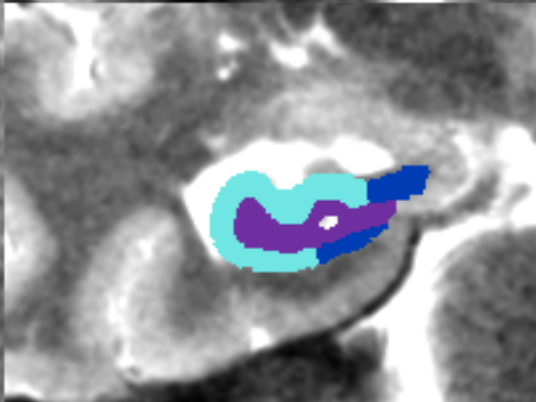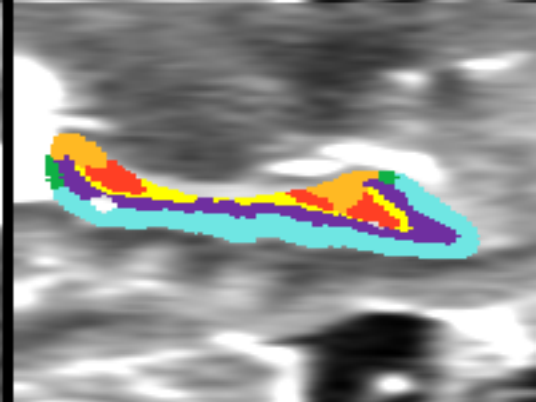

ashs

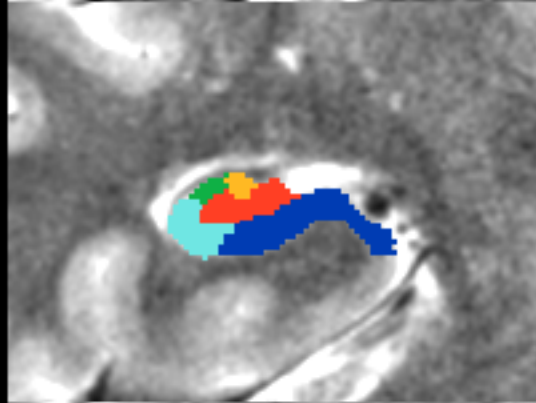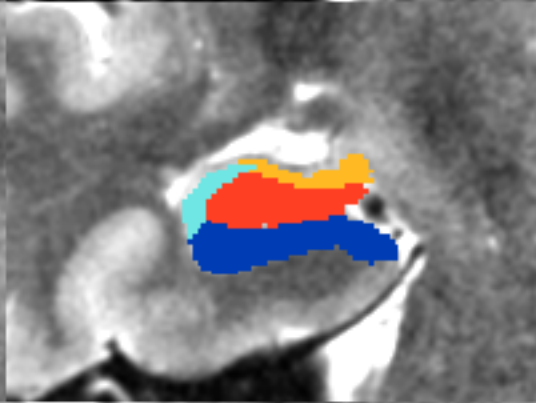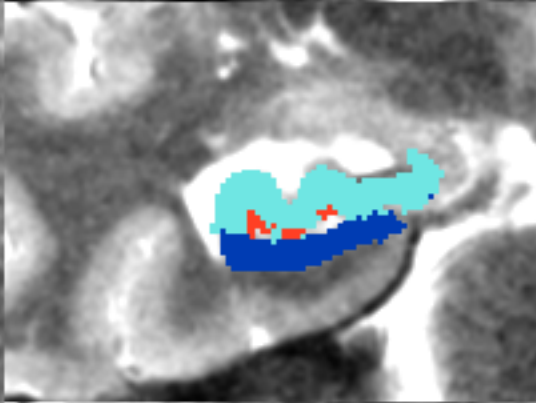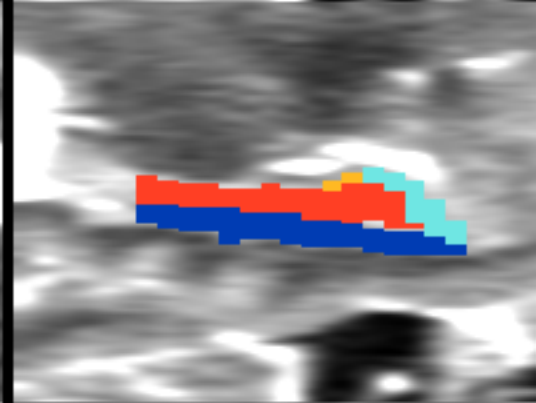

freesurfer

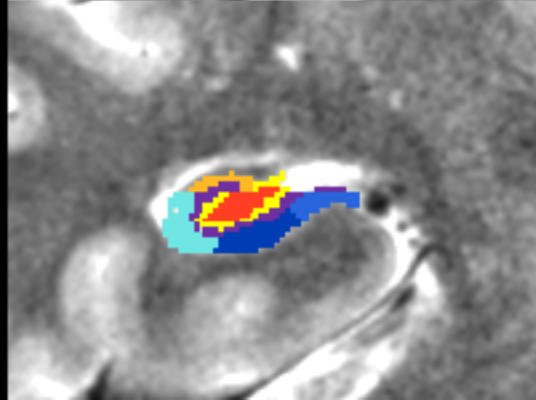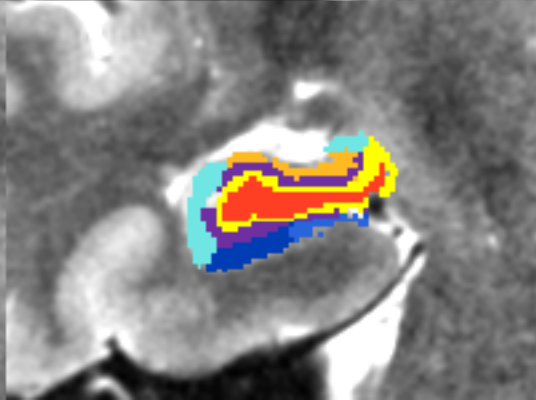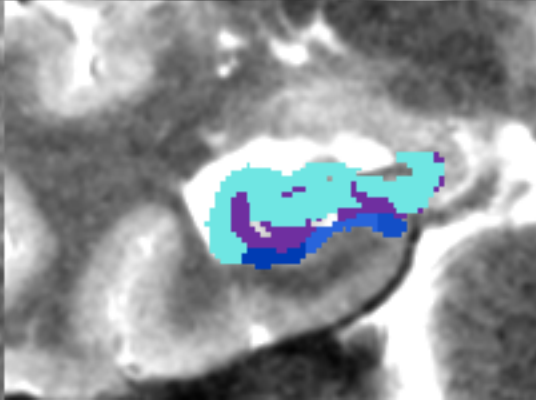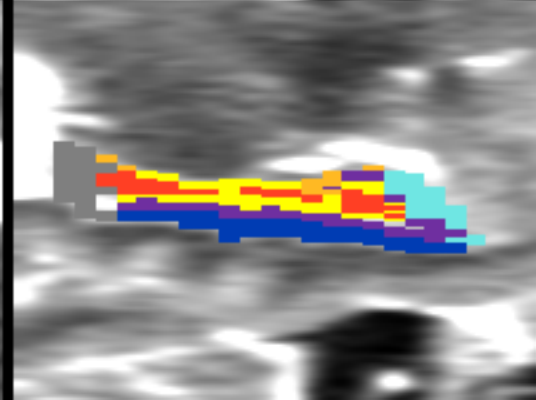

hemi=R,subject=7982706

MRI

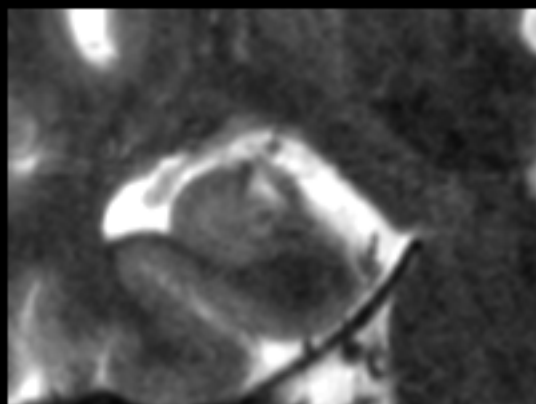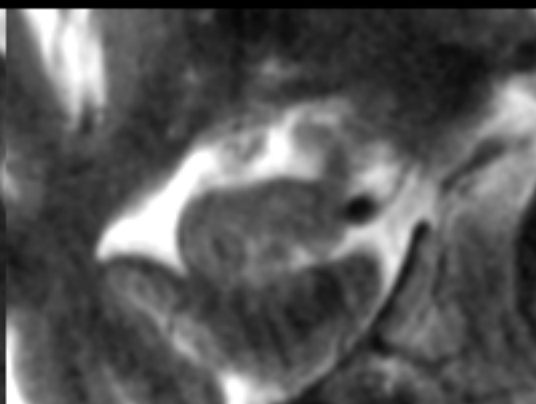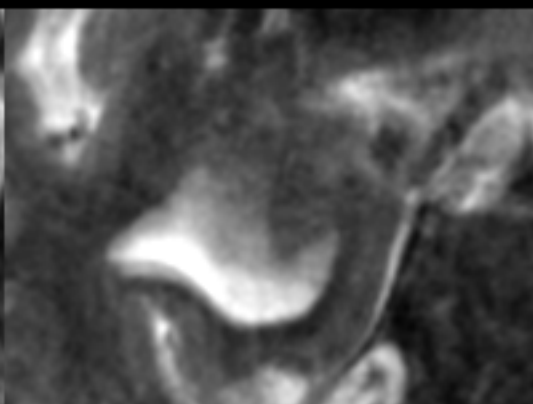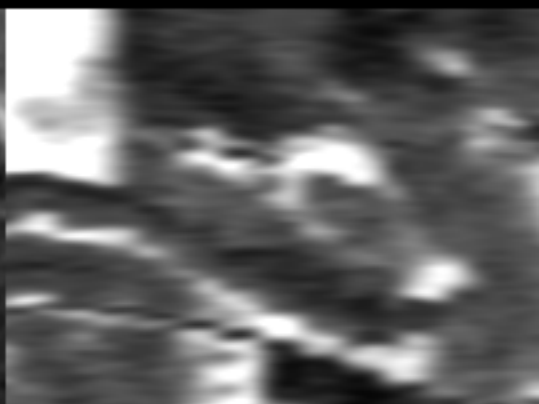

hippunfoldT1

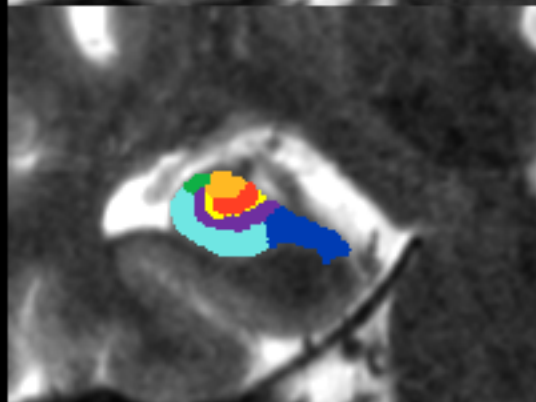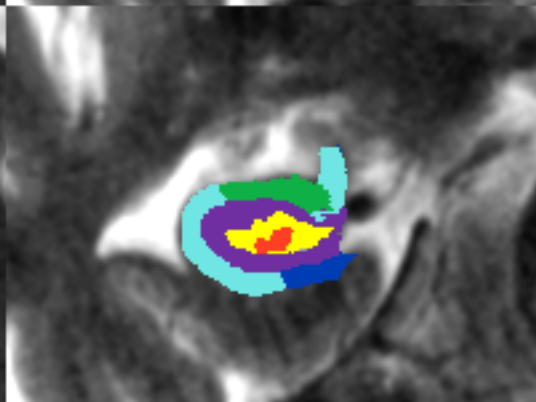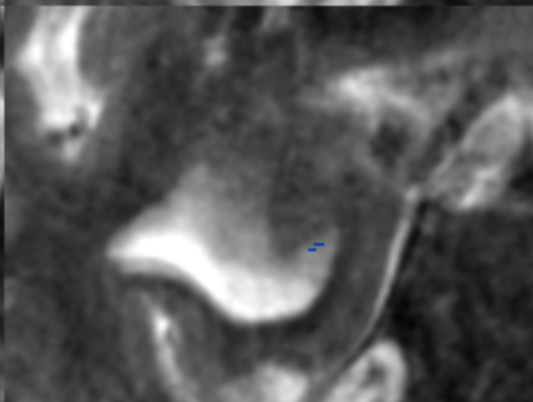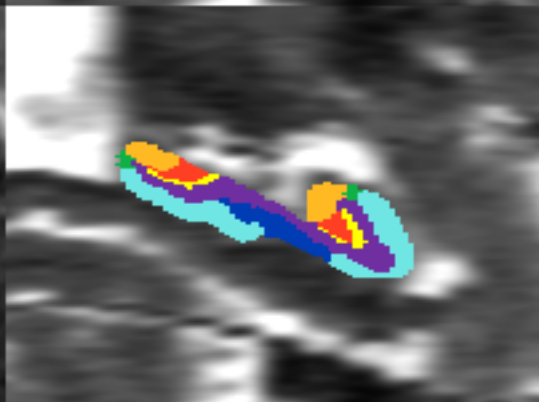

ashs

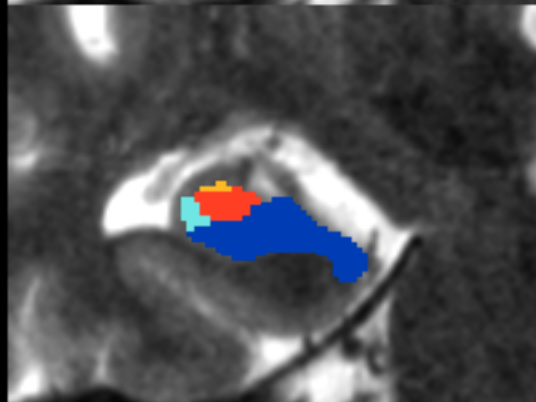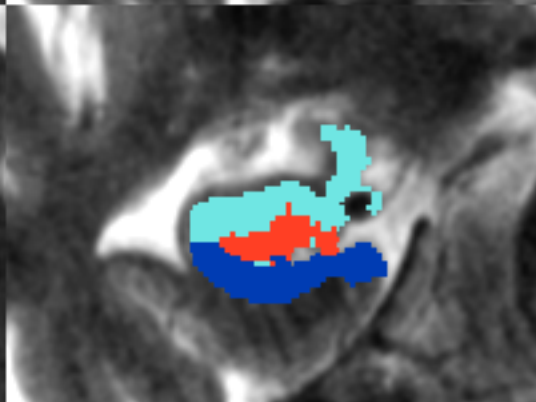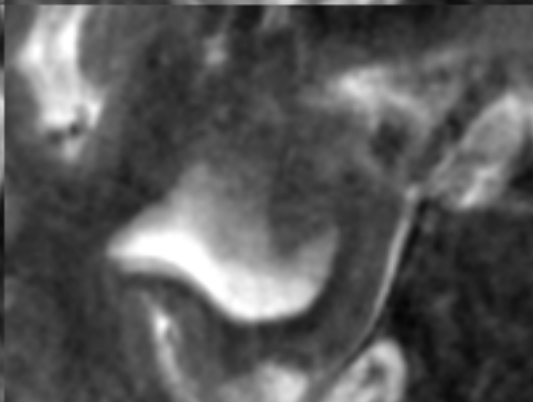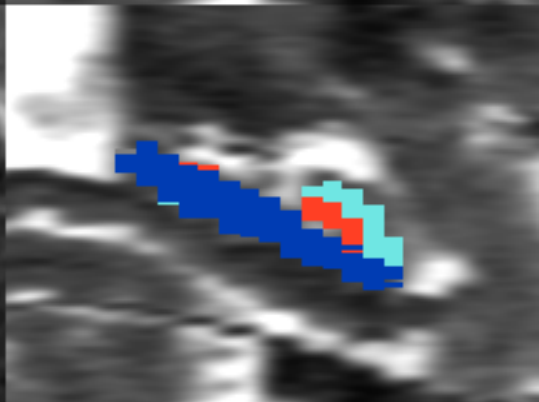

freesurfer

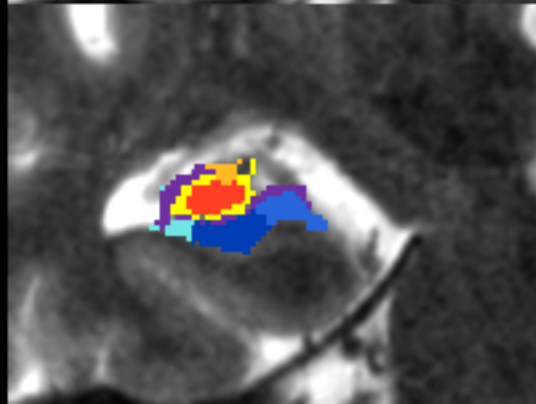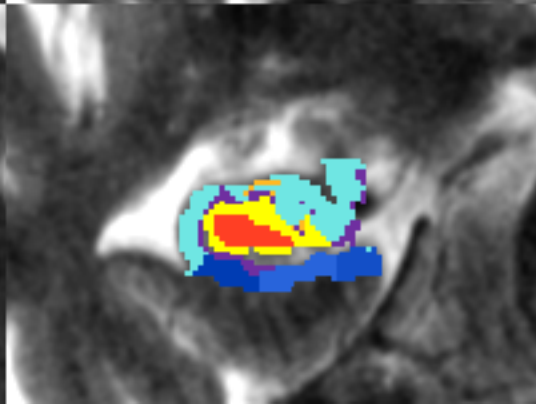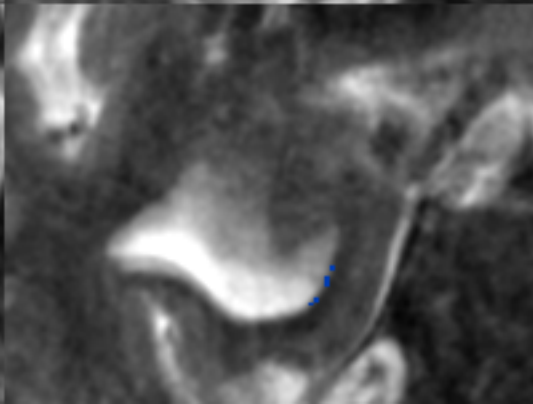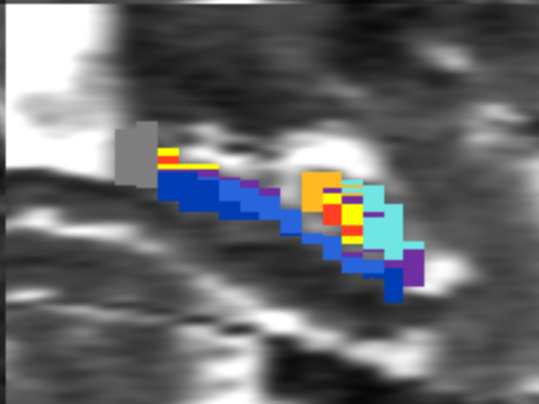

hemi=R,subject=8001042

MRI

hippunfoldT1

ashs

freesurfer

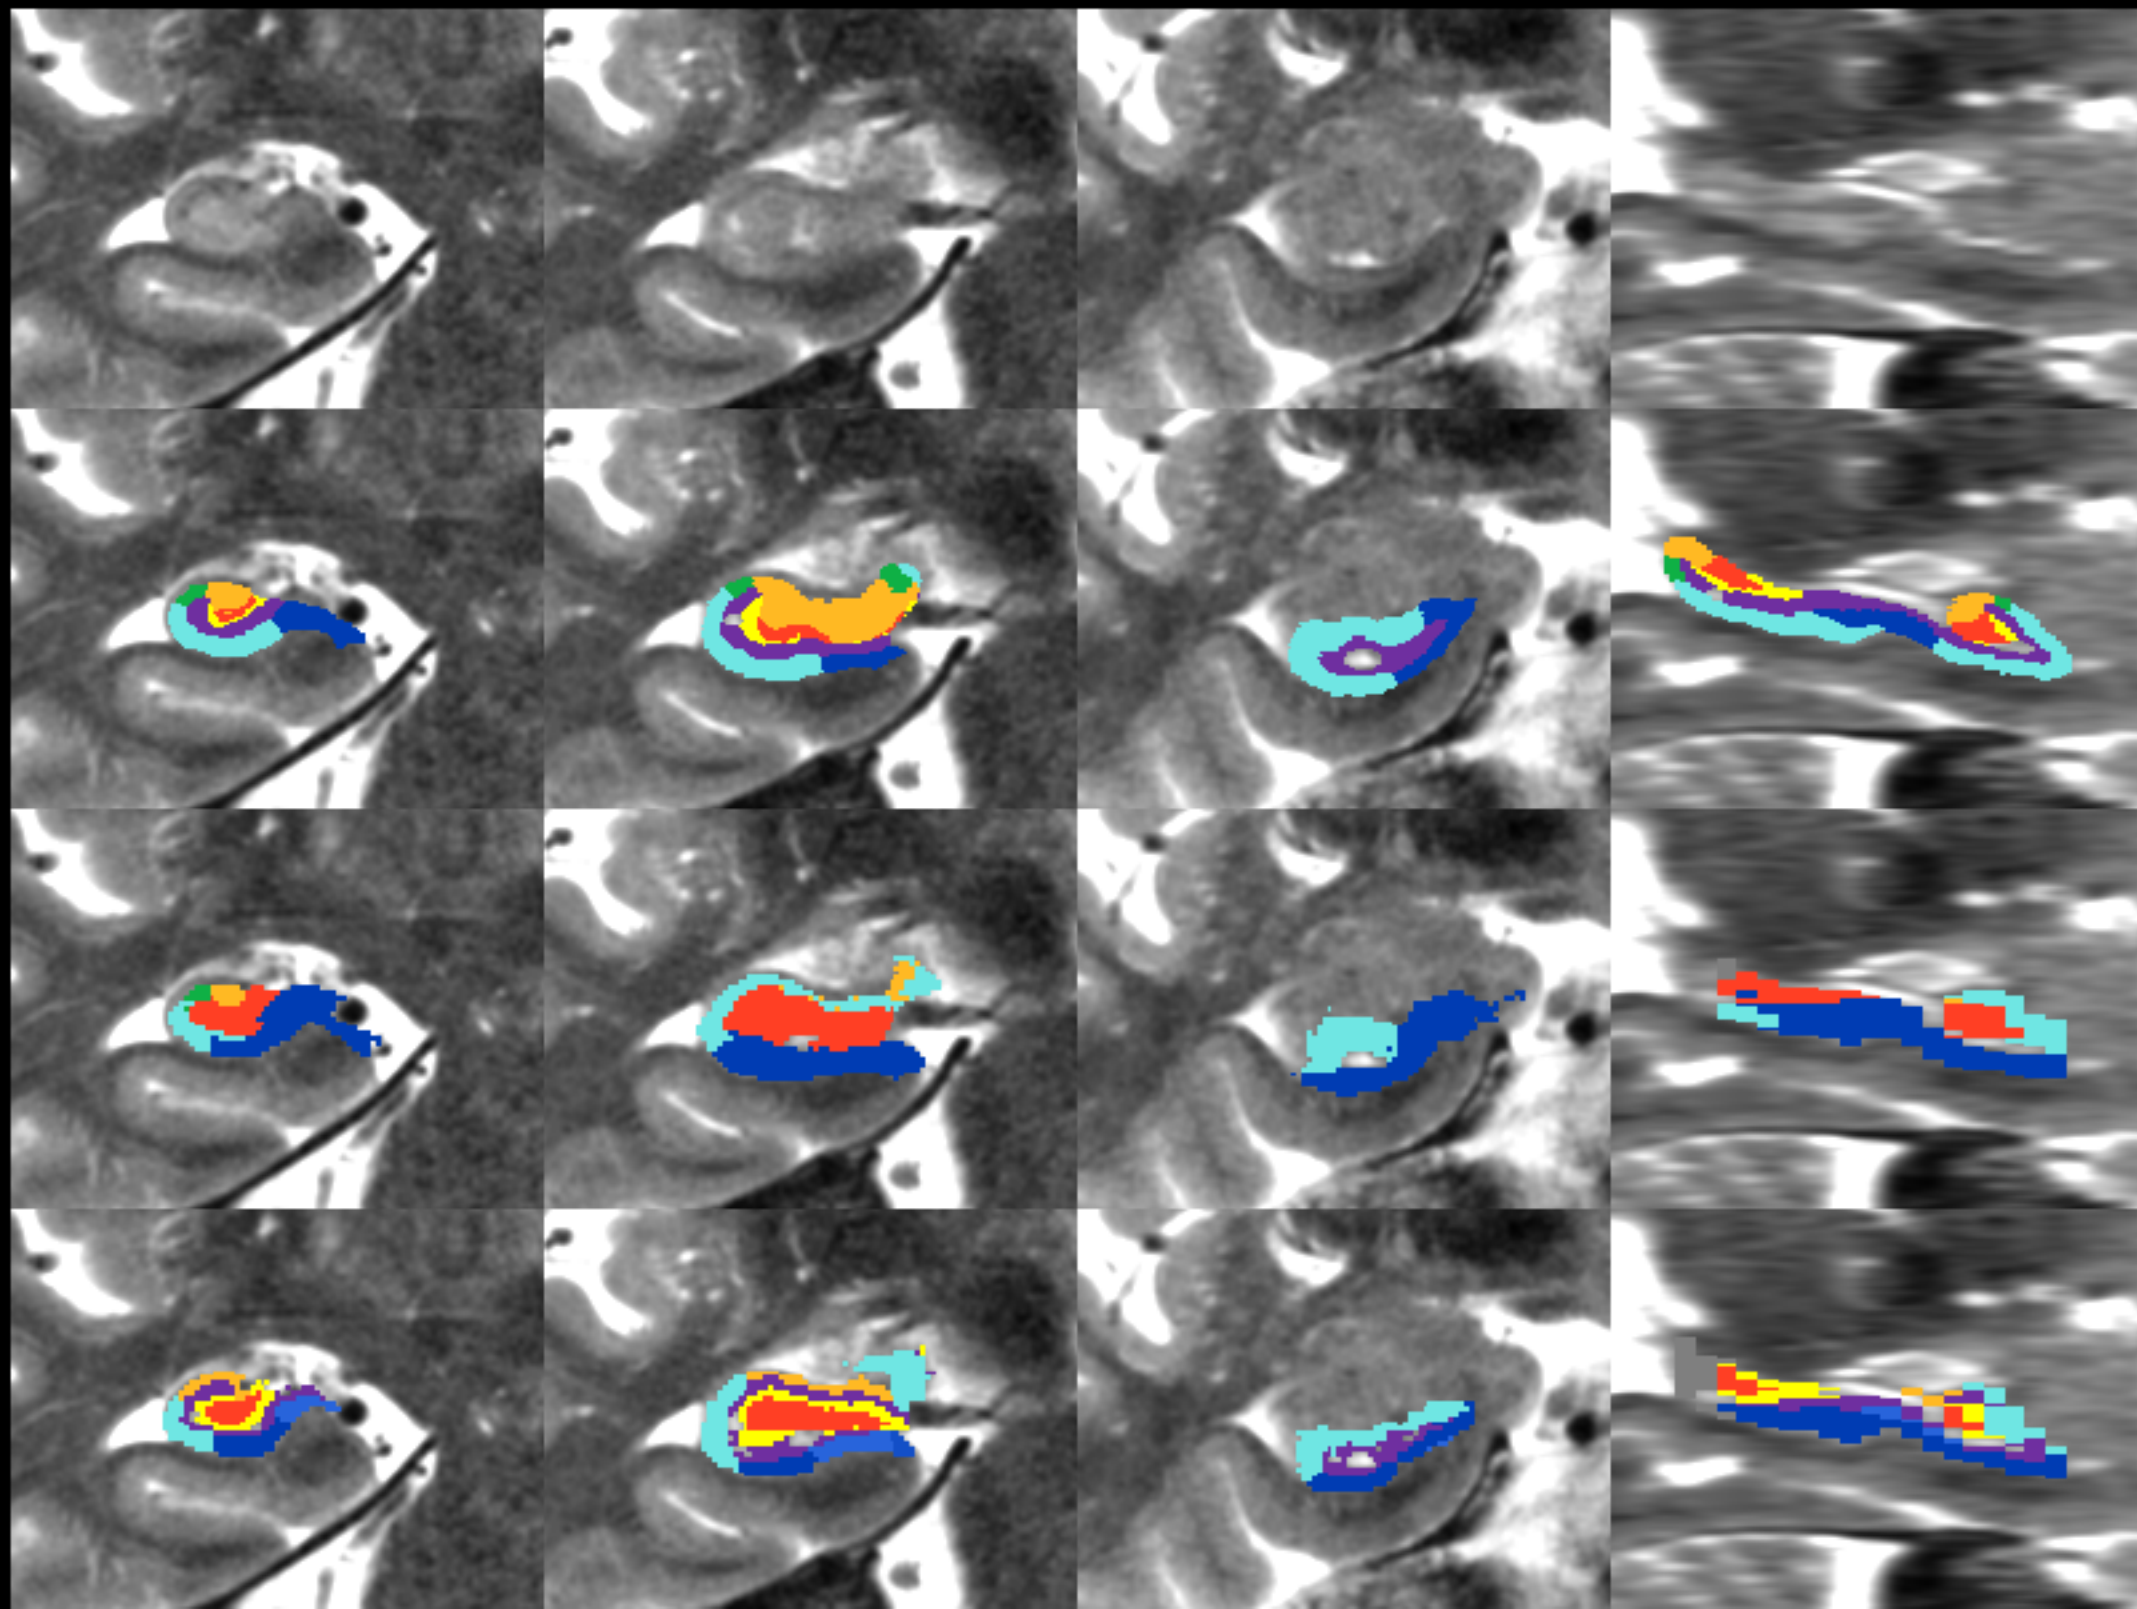

hemi=R,subject=8065270

MRI

hippunfoldT1

ashs

freesurfer

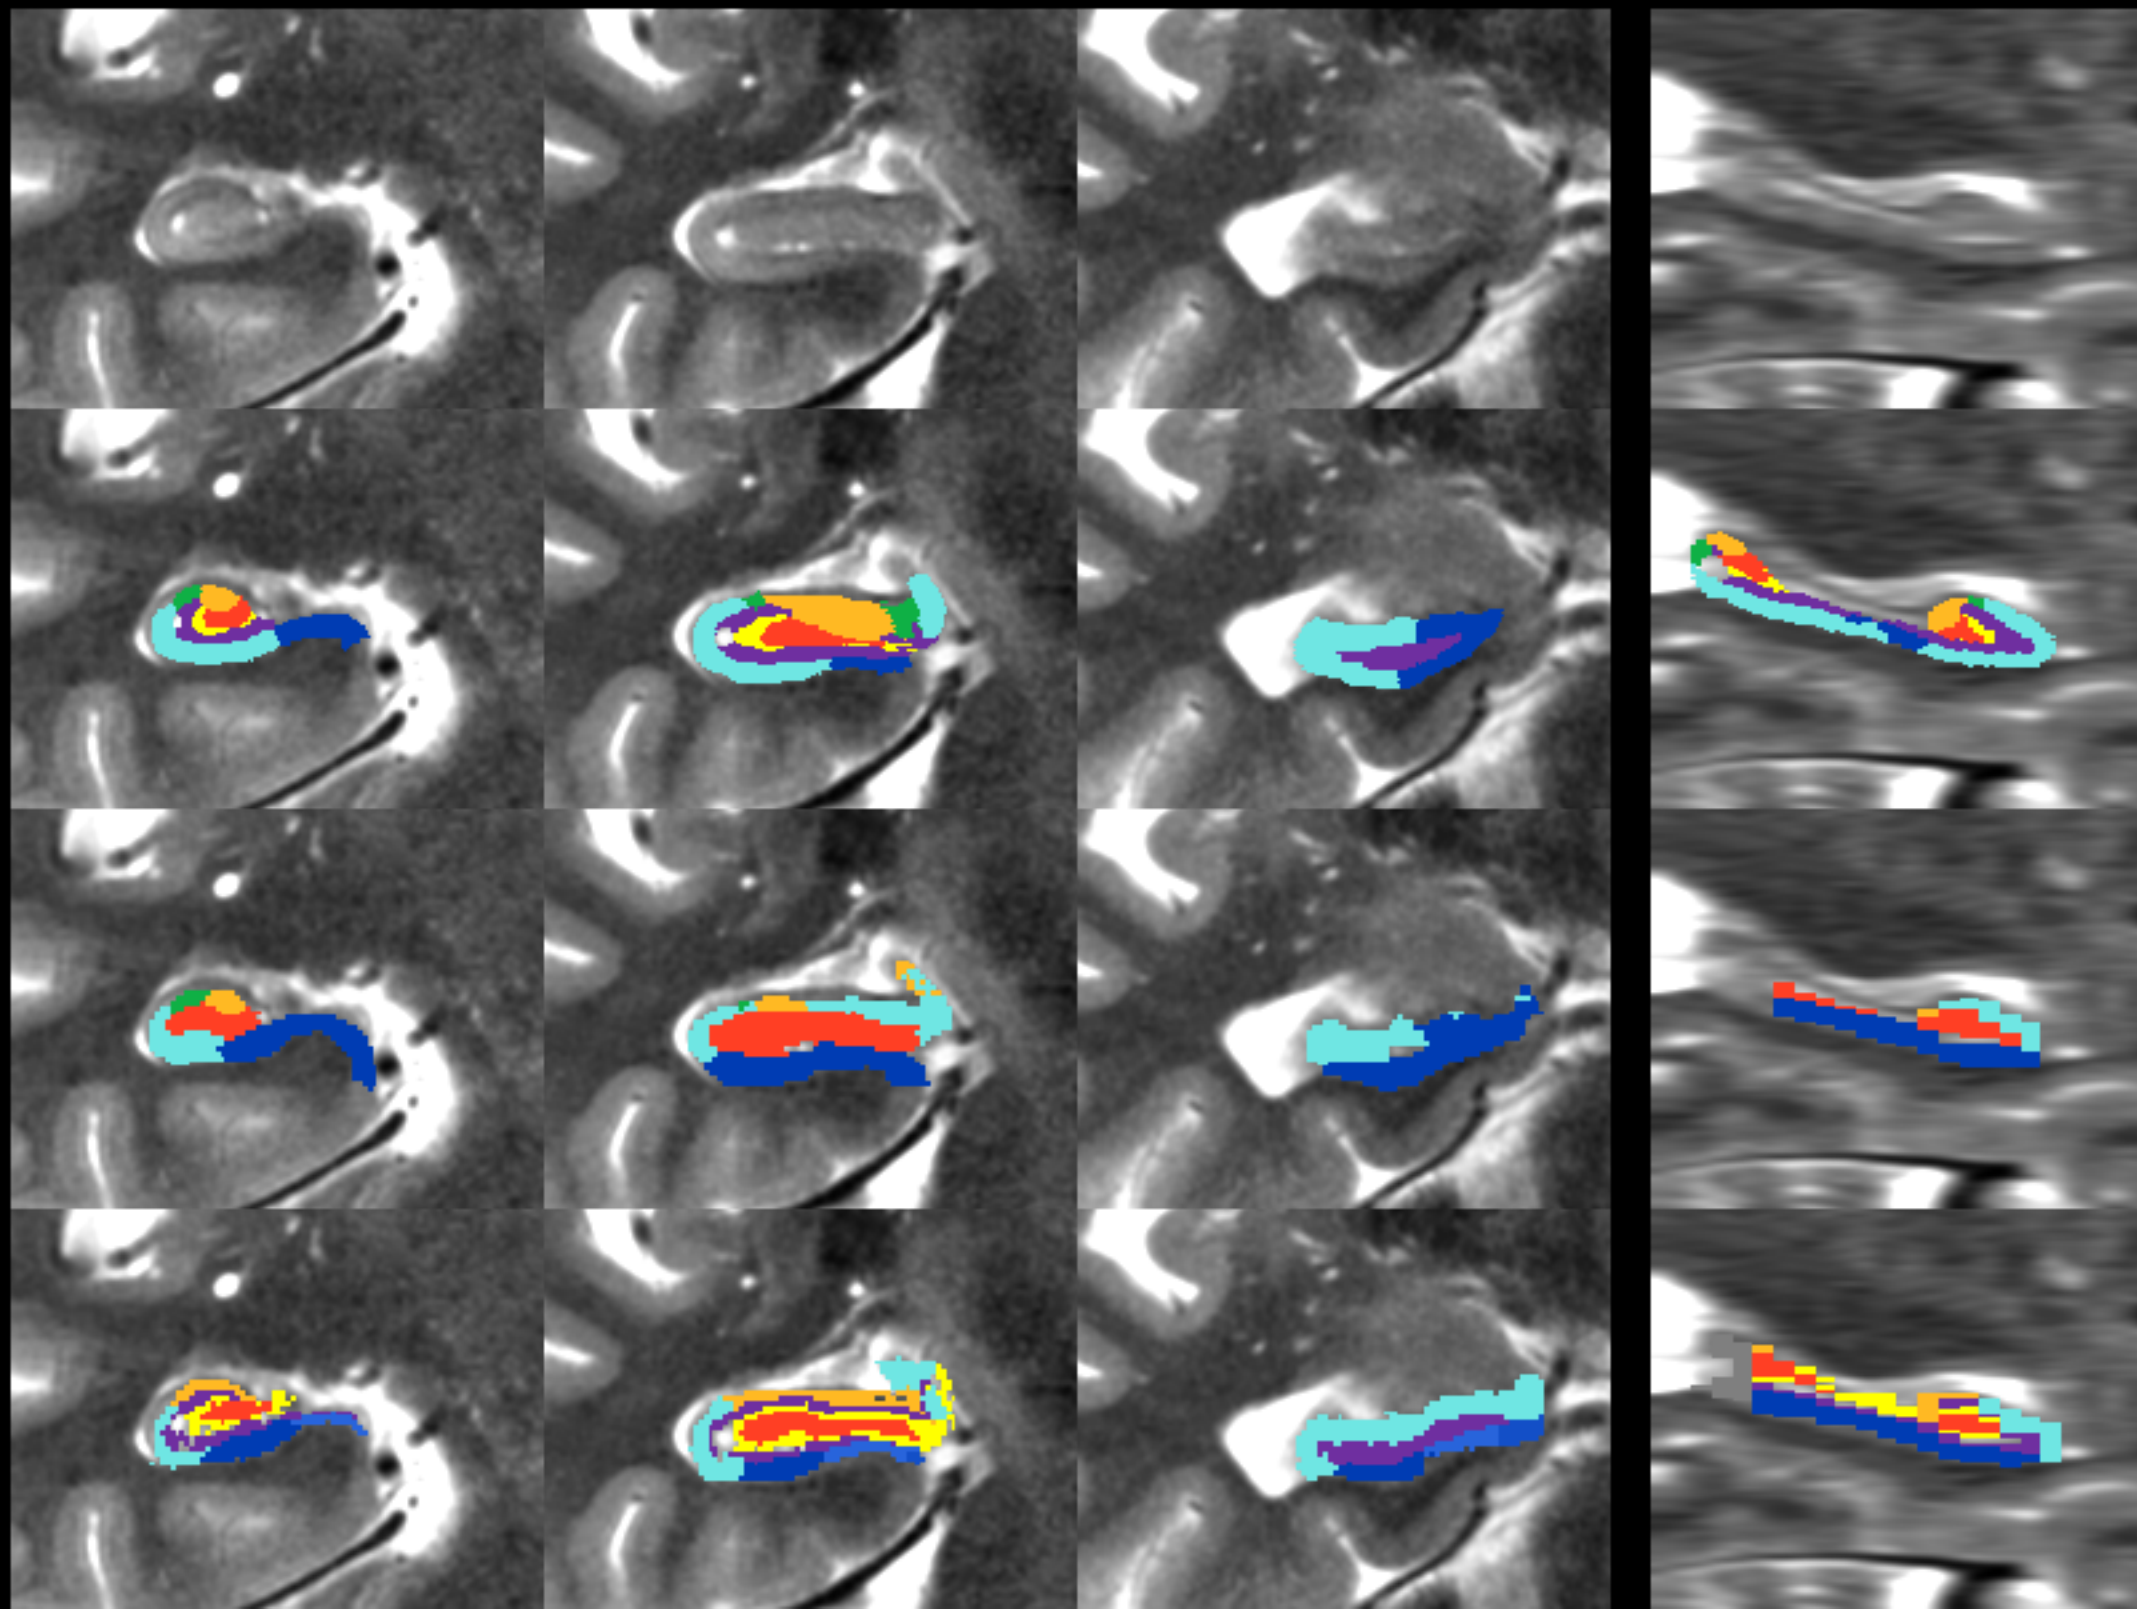

hemi=R,subject=8127165

MRI

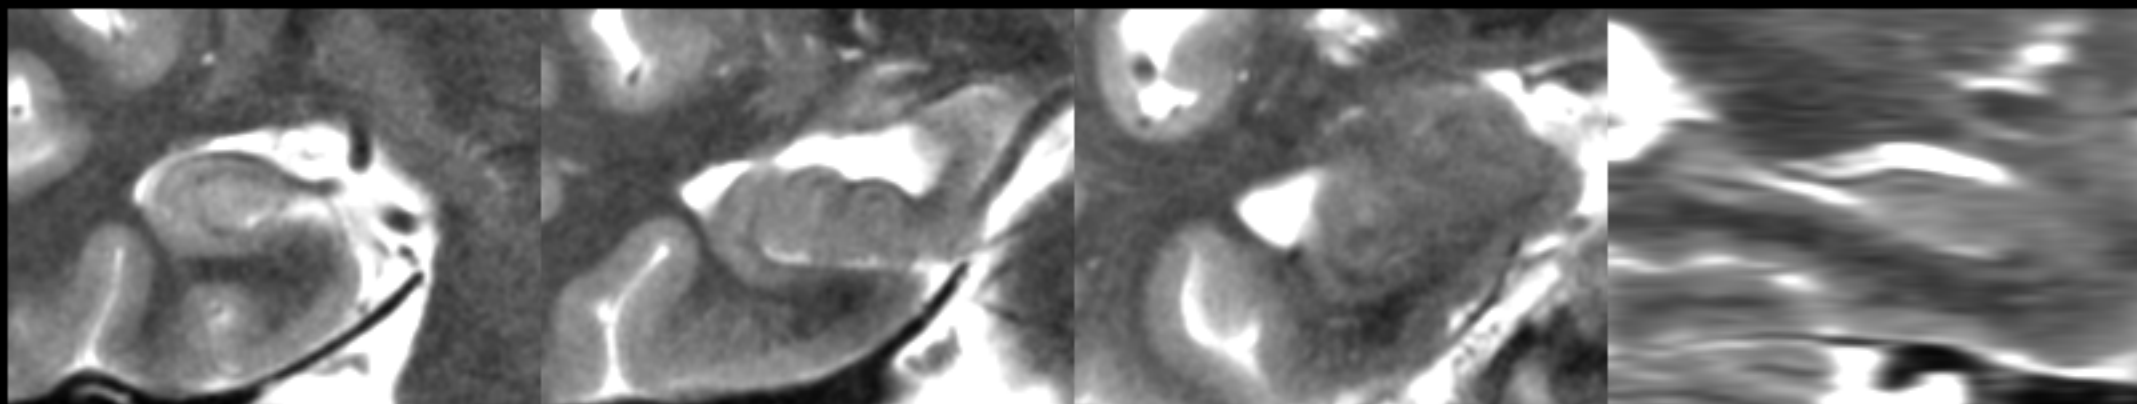

hippunfoldT1

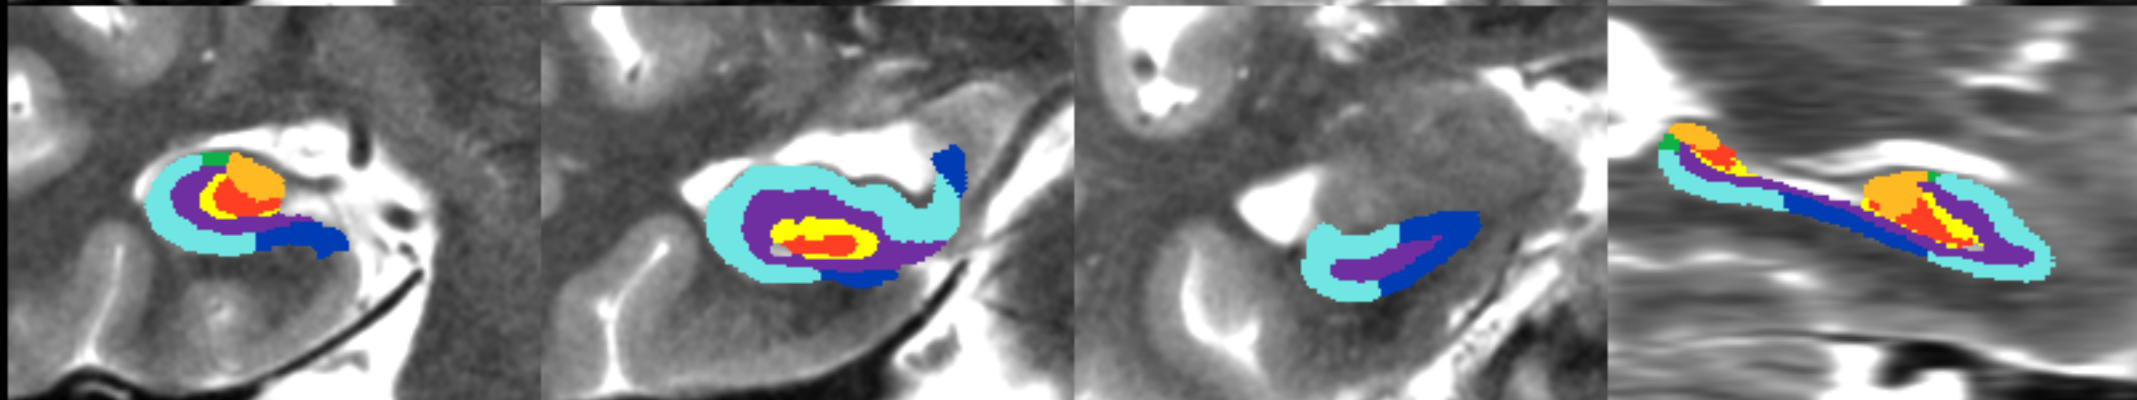

ashs

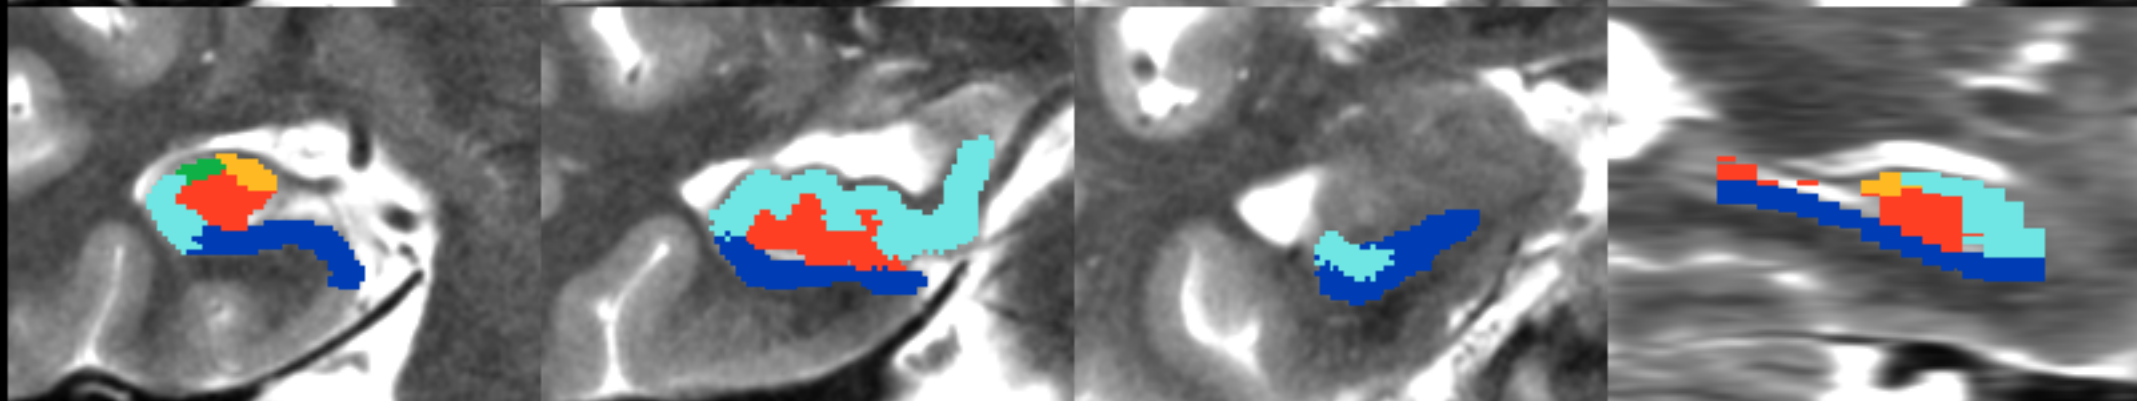

freesurfer

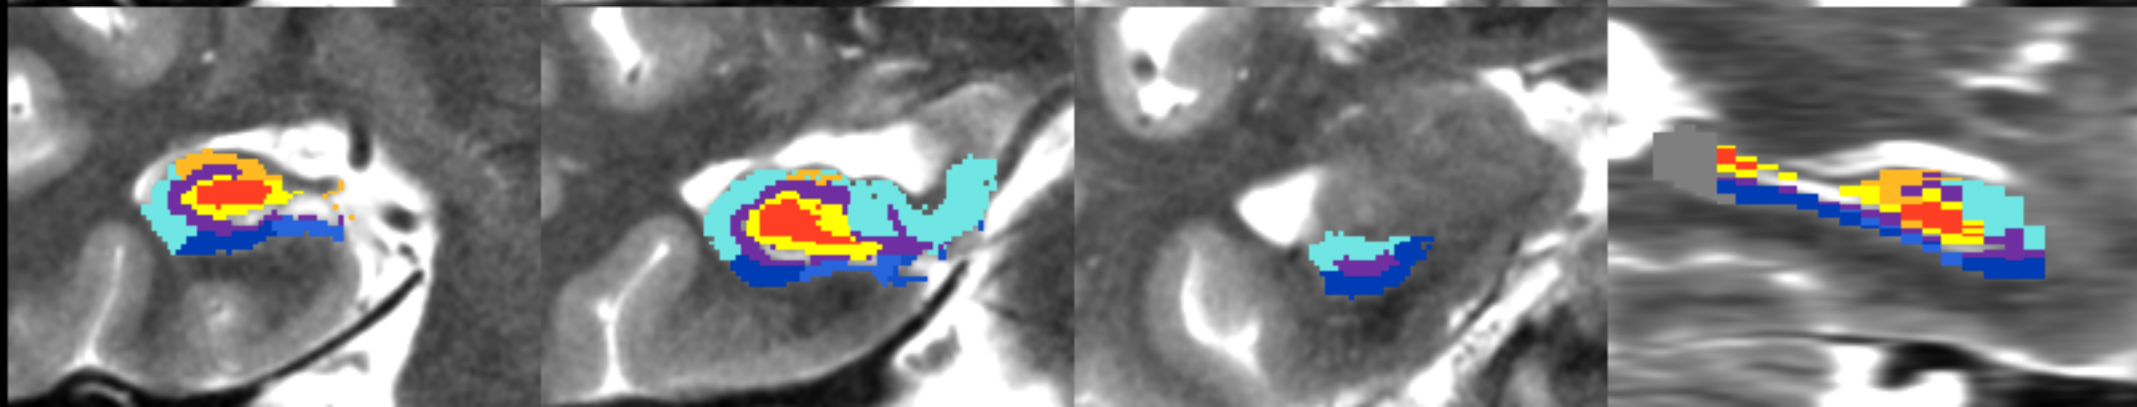

hemi=R,subject=8151667

MRI

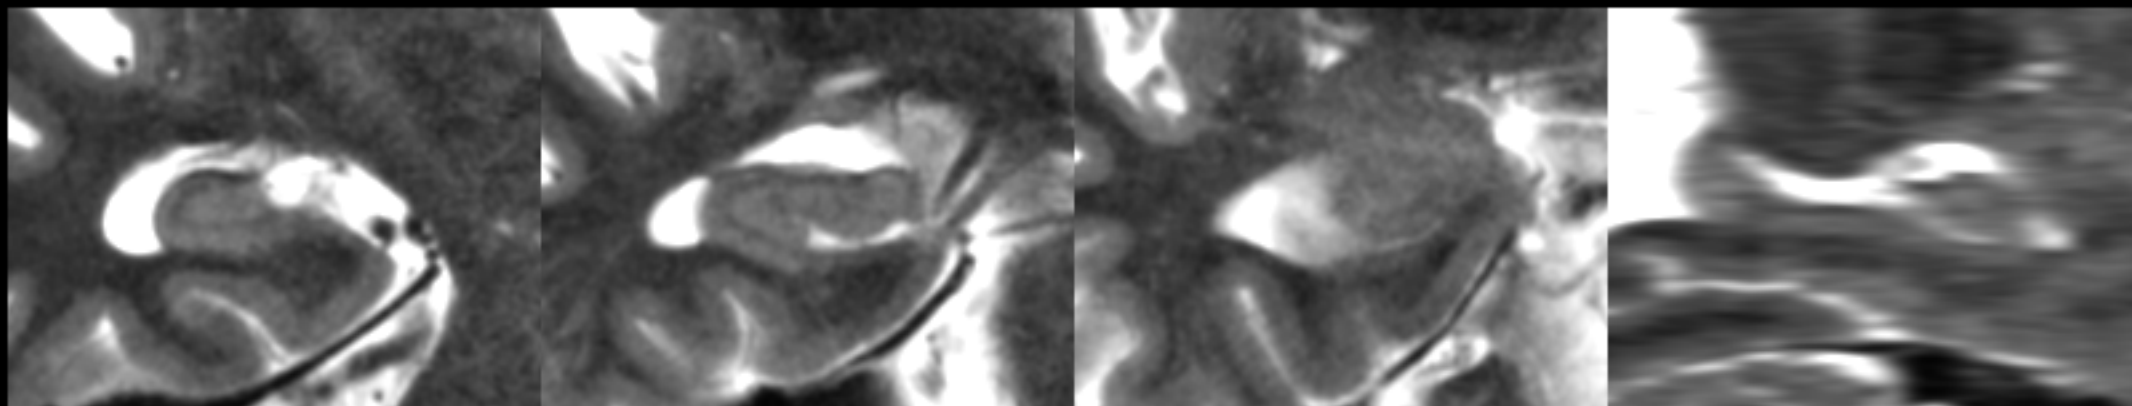

hippunfoldT1

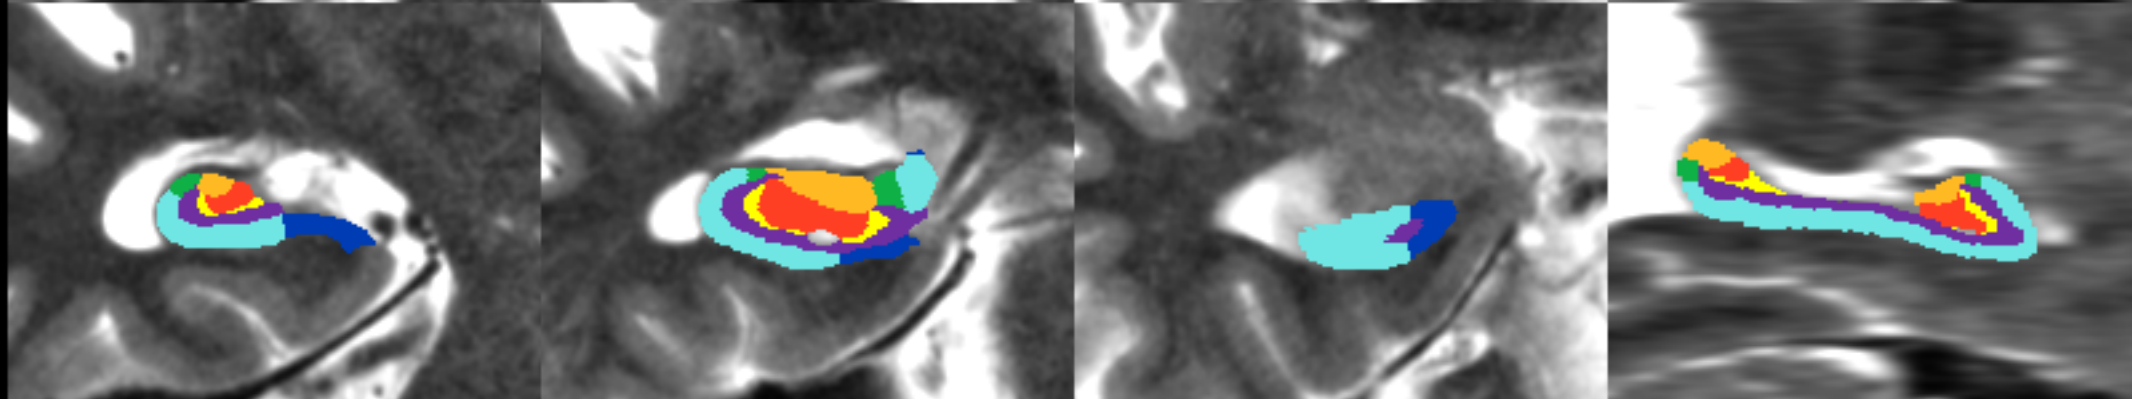

ashs

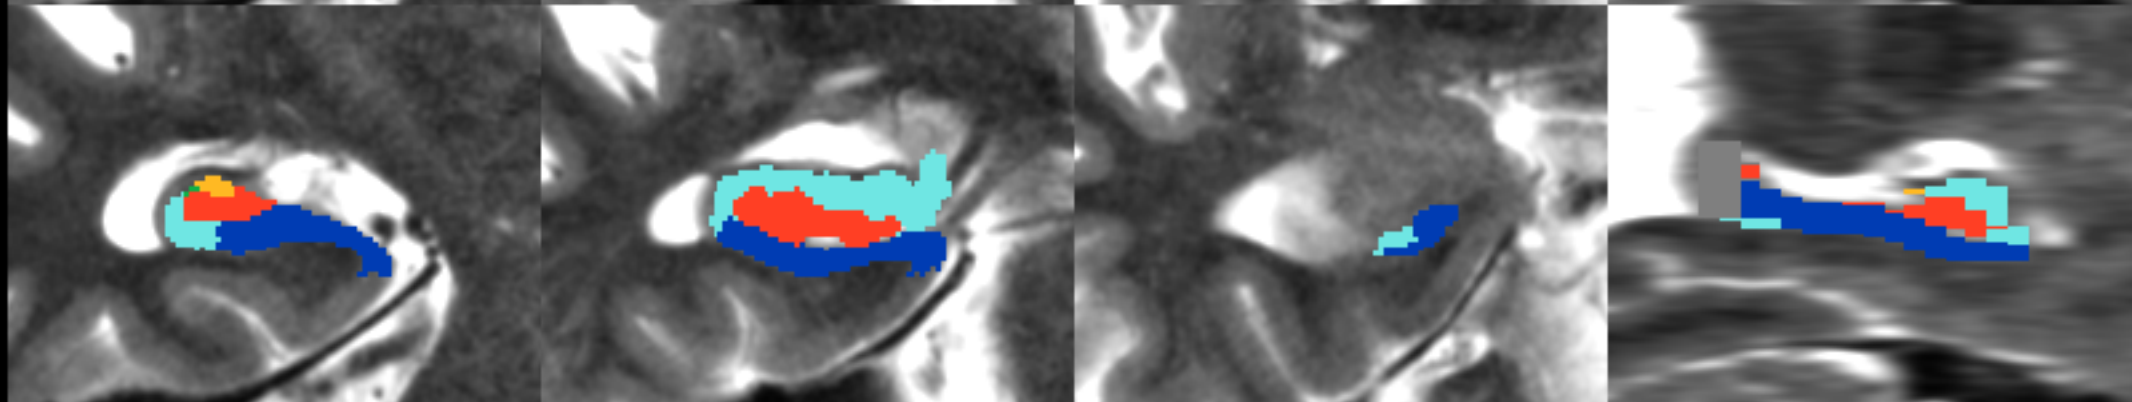

freesurfer

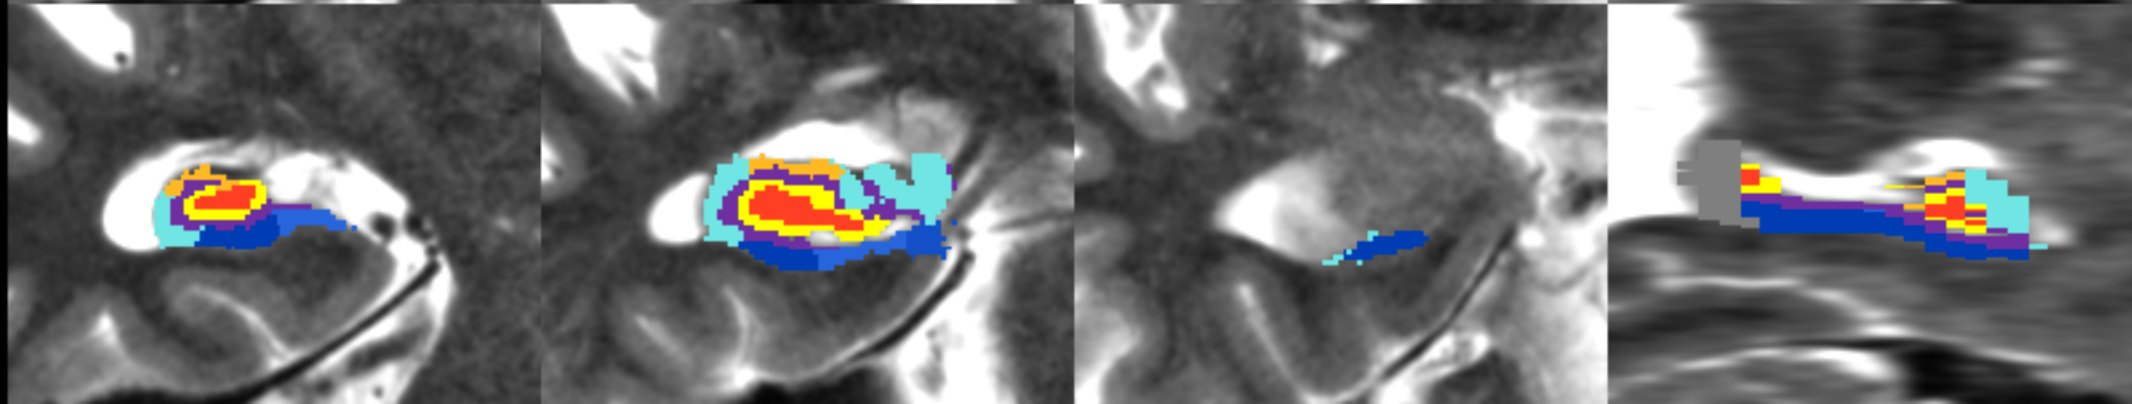

hemi=R,subject=8206666

MRI

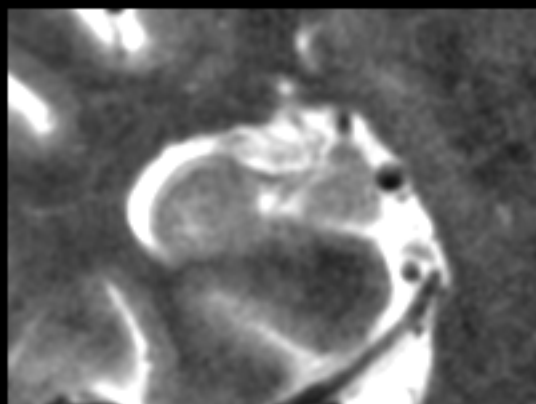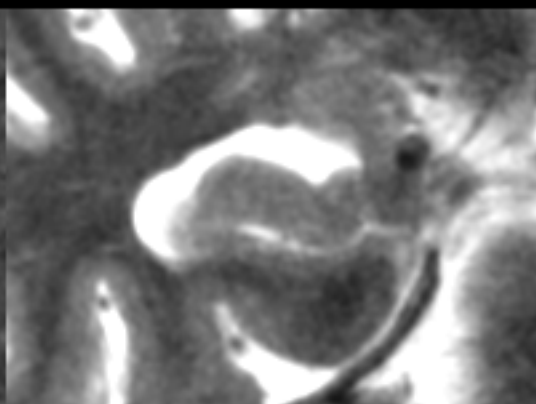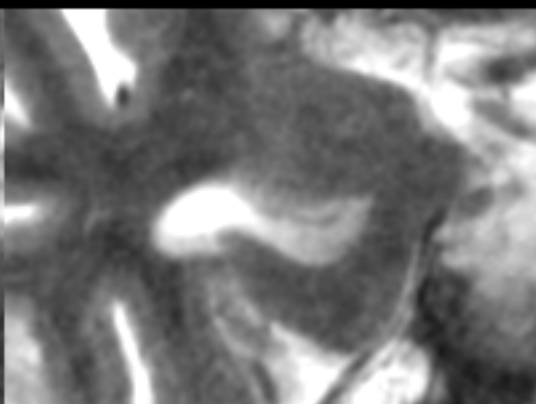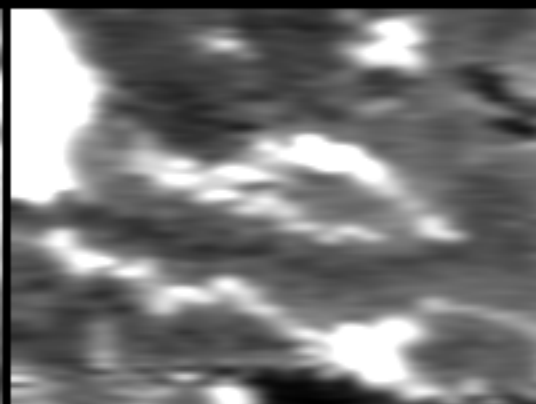

hippunfoldT1

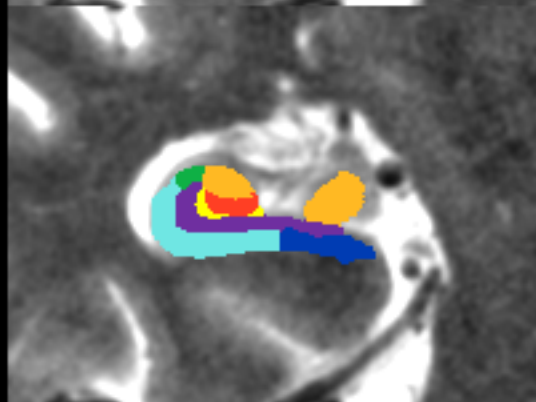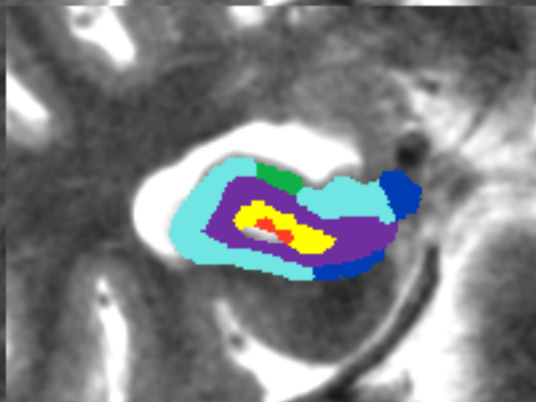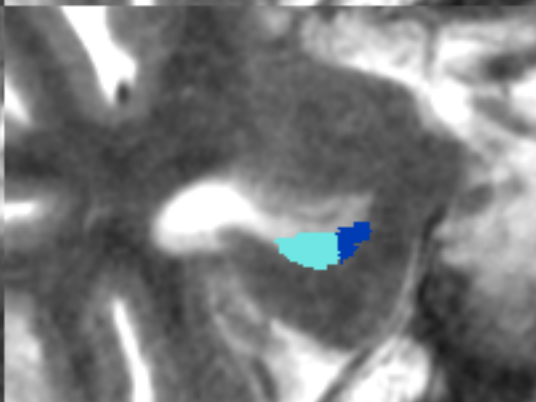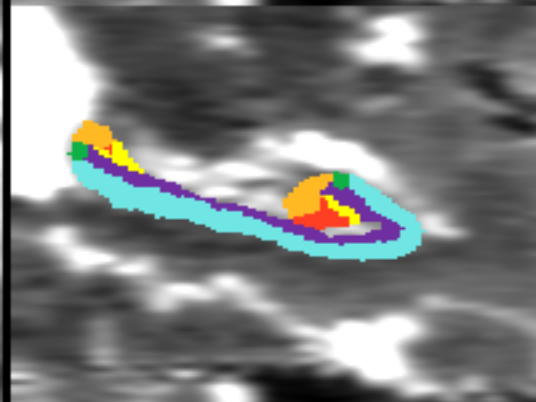

ashs

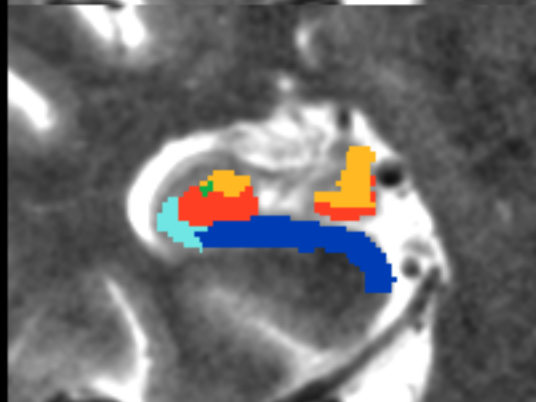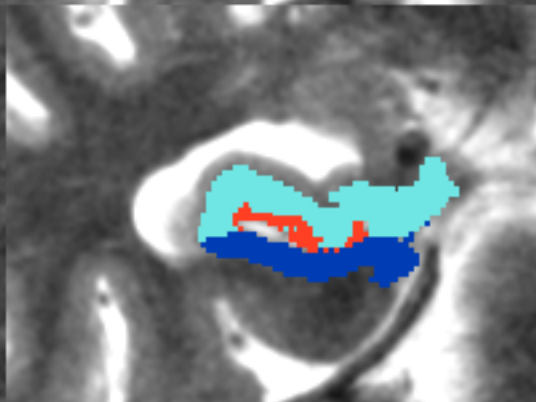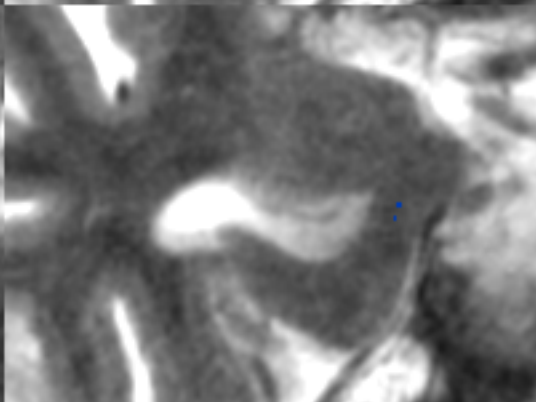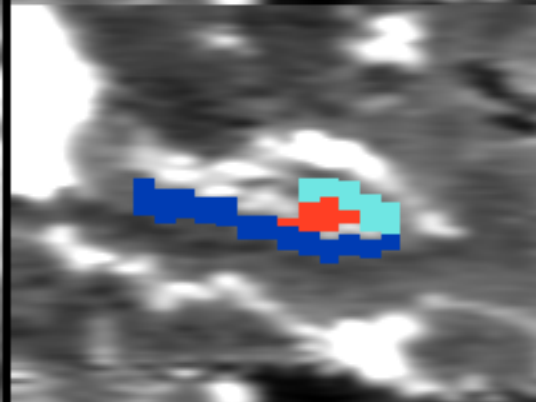

freesurfer

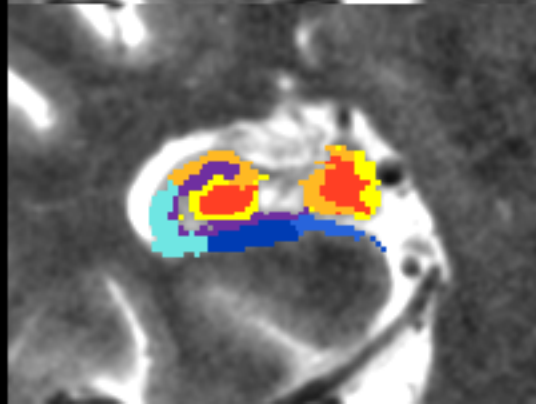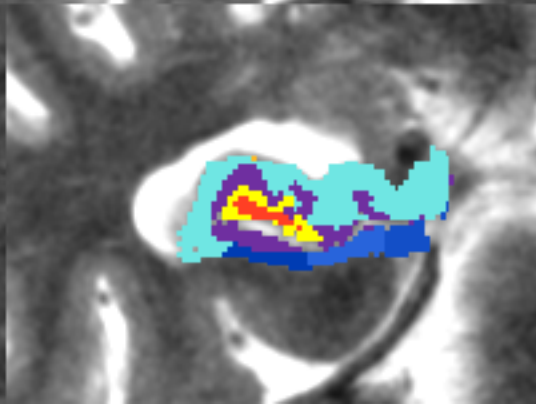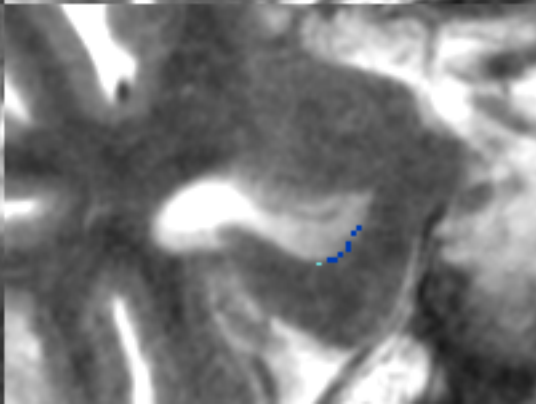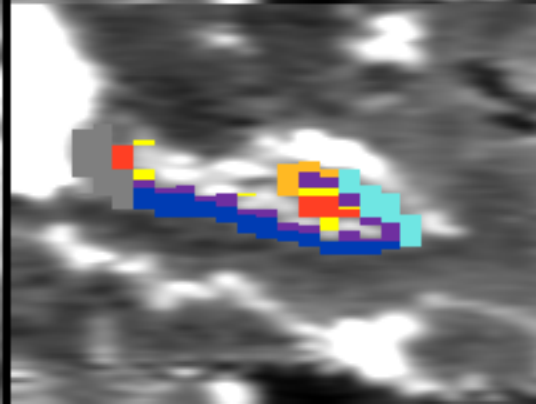

hemi=R,subject=8244977

MRI

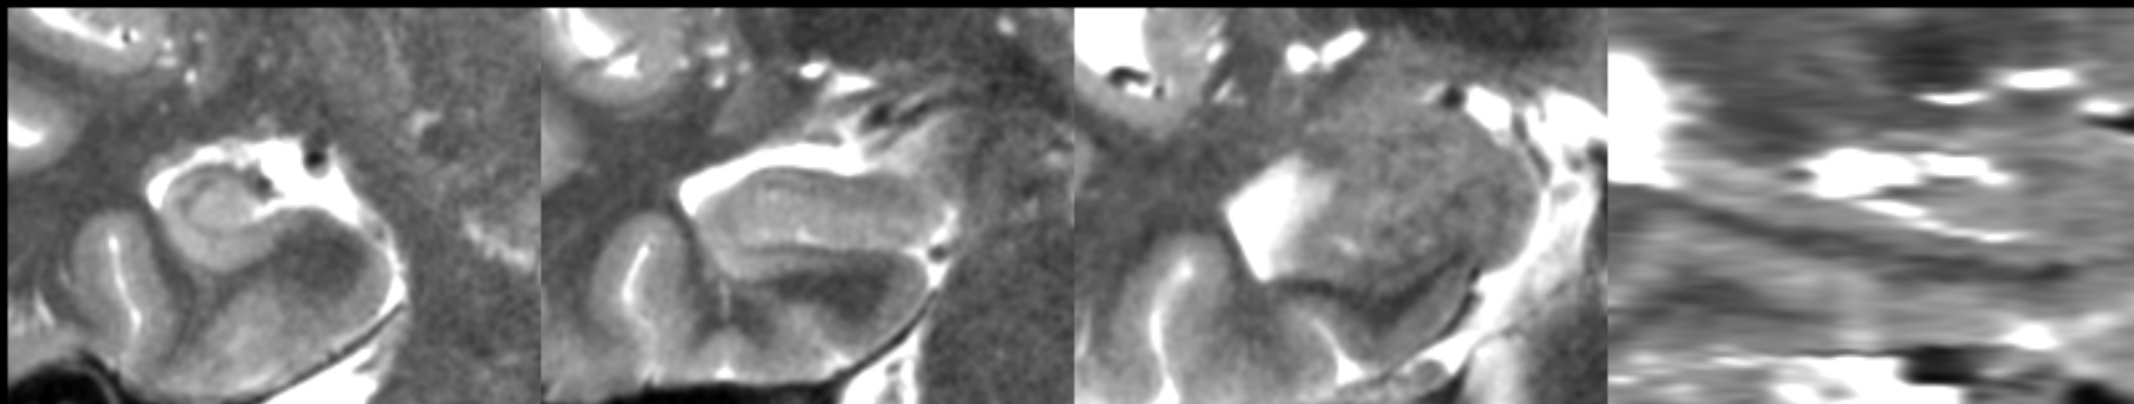

hippunfoldT1

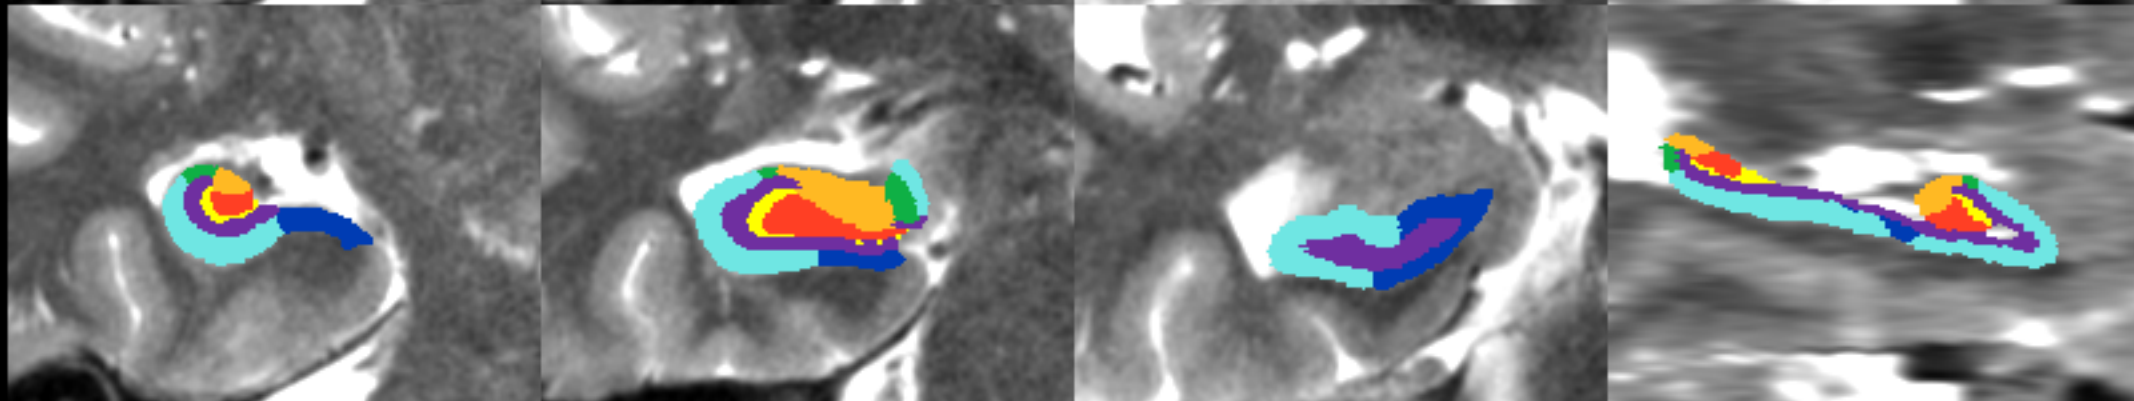

ashs

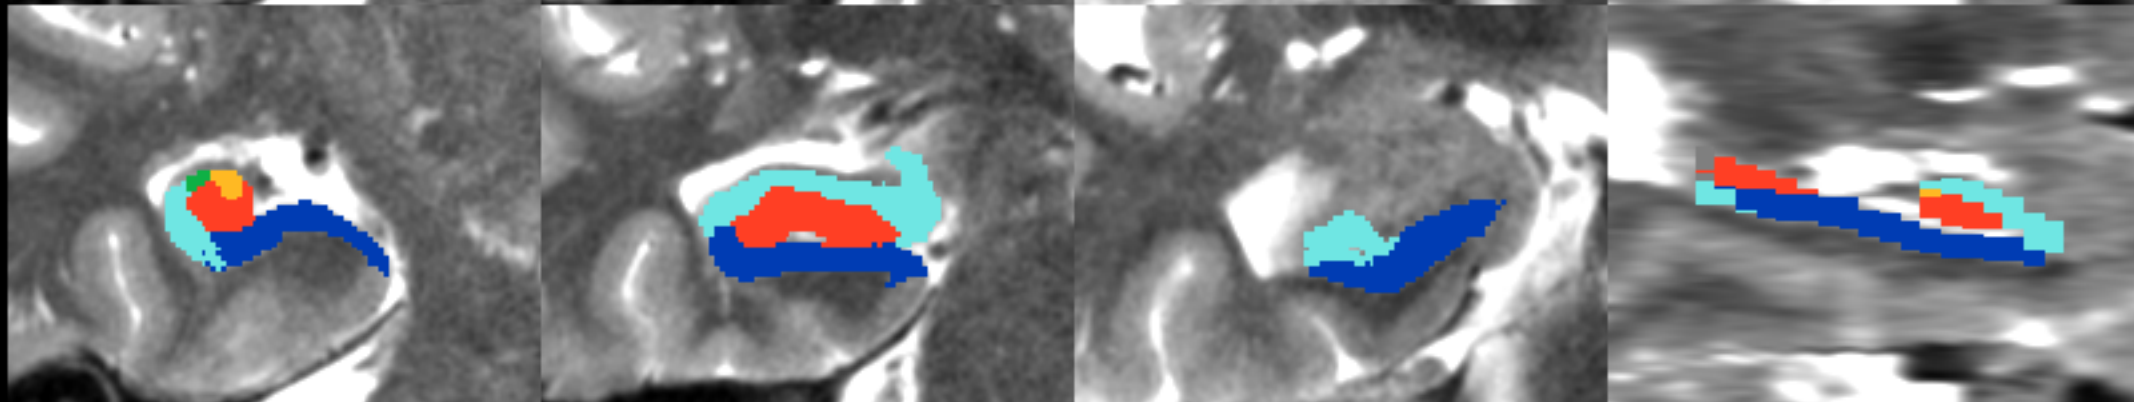

freesurfer

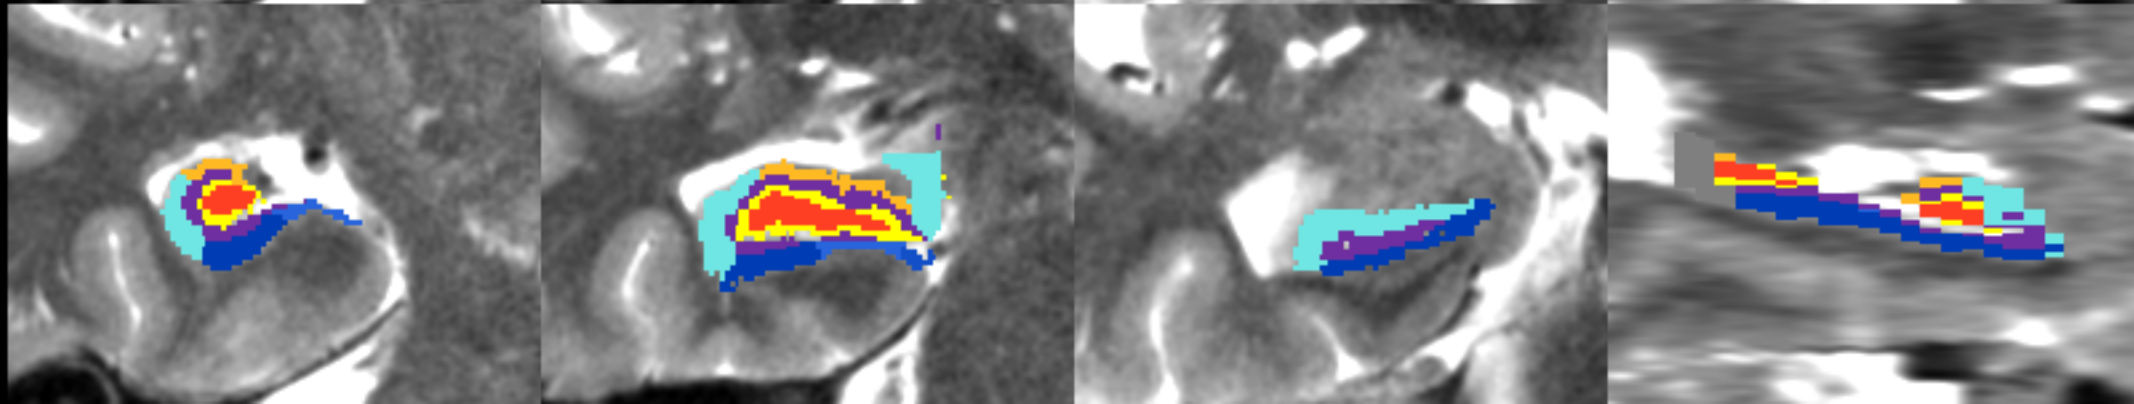



hemi=R,subject=8253978

MRI

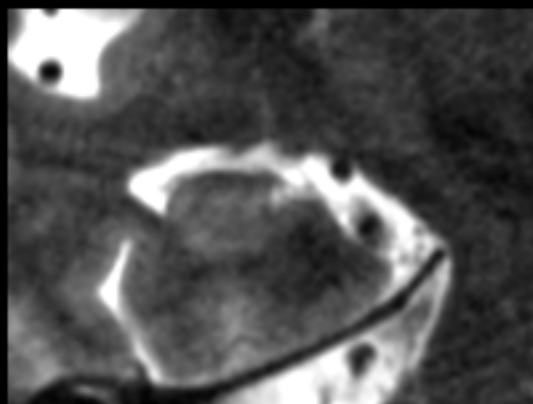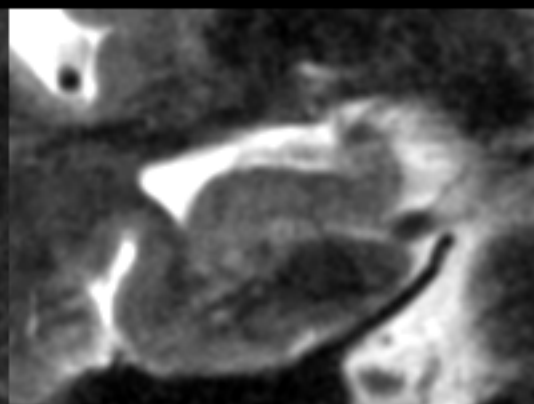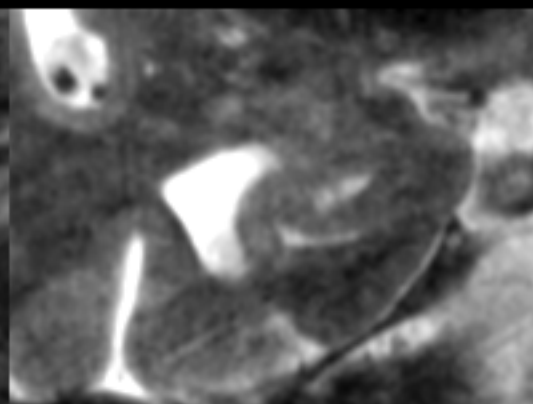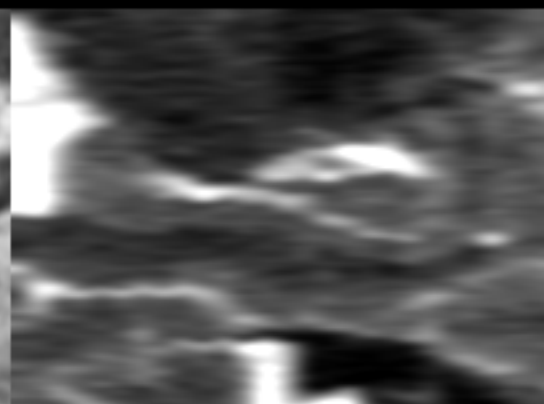

hippunfoldT1

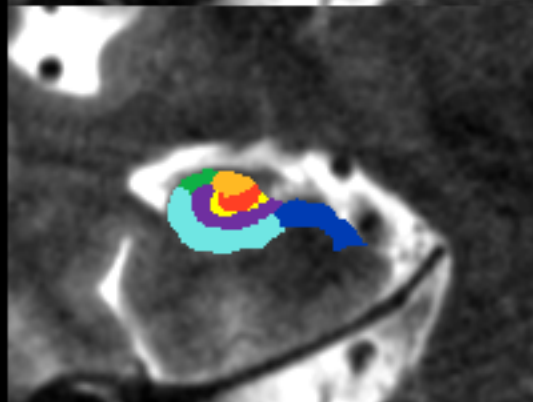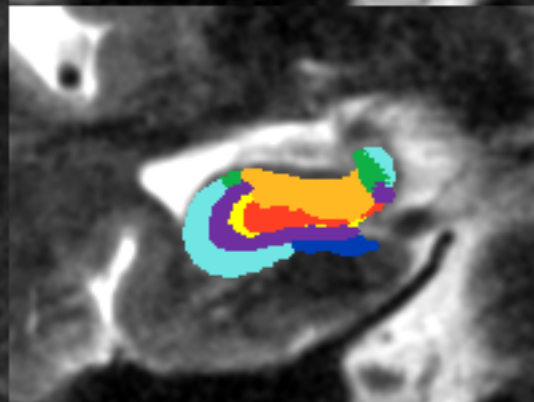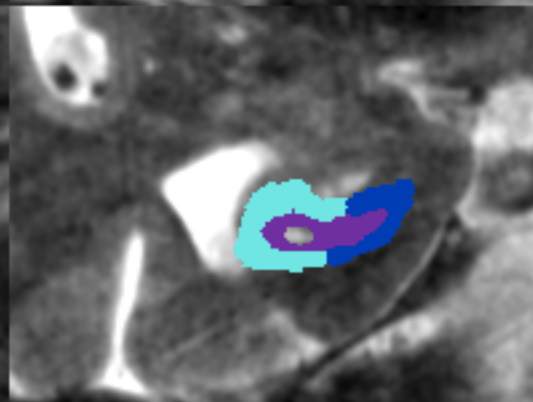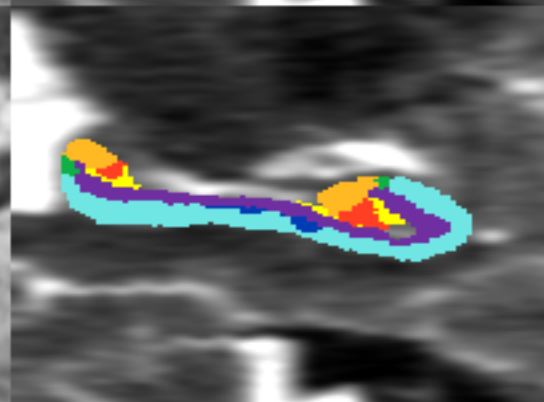

ashs

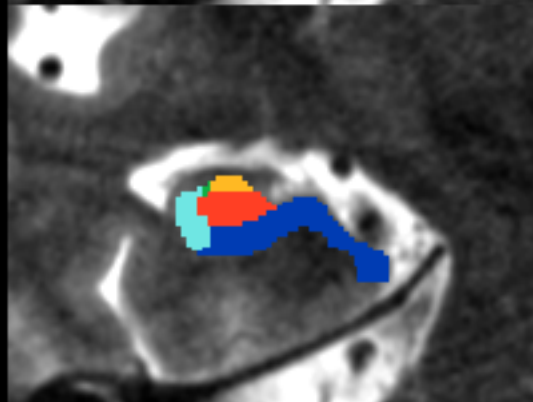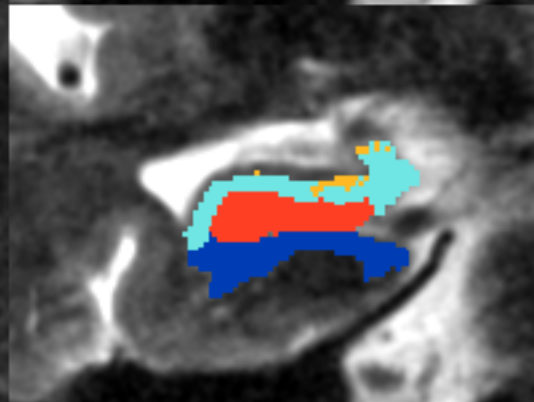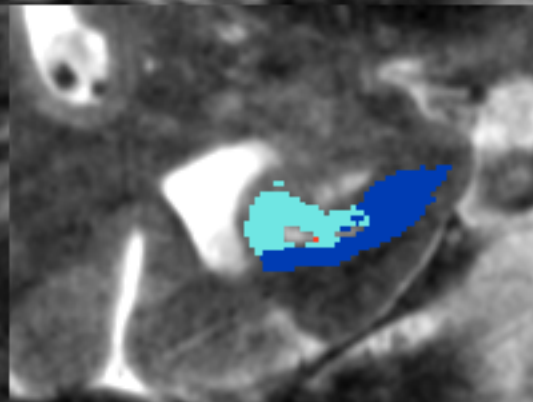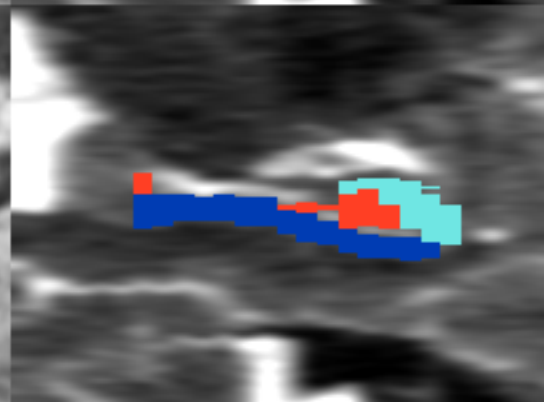

freesurfer

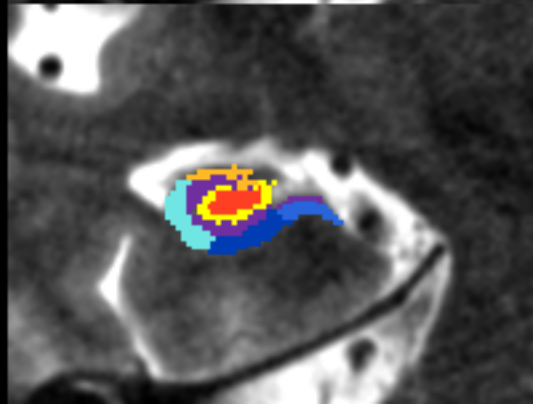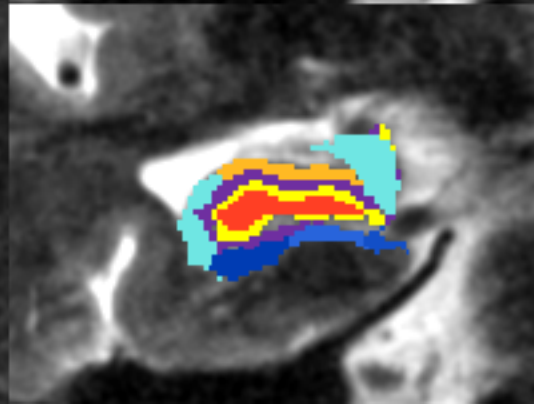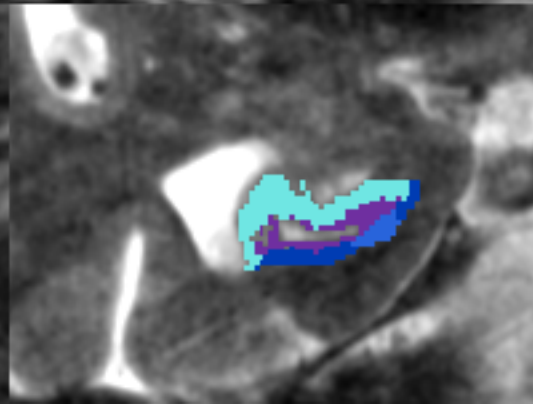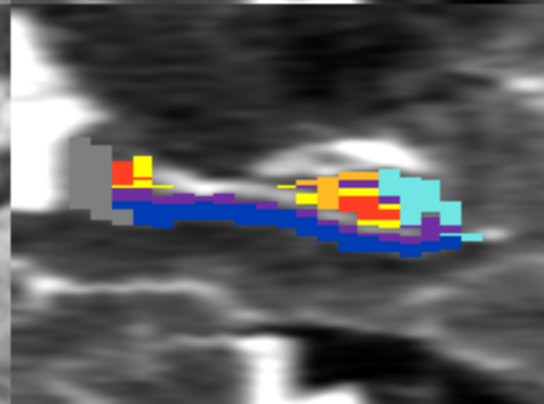

hemi=R,subject=8434376

MRI

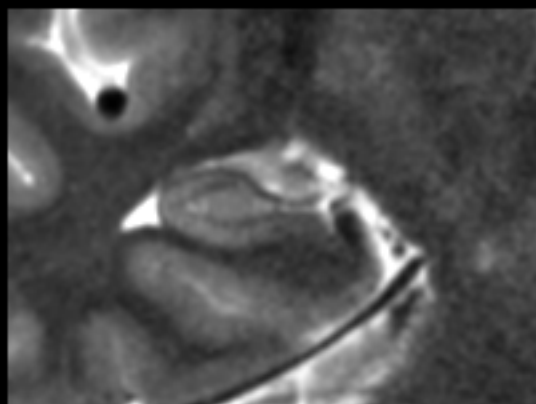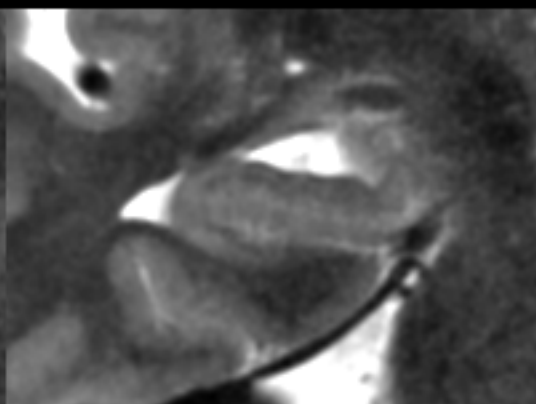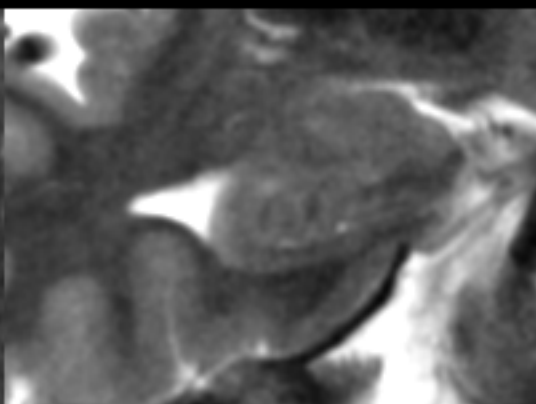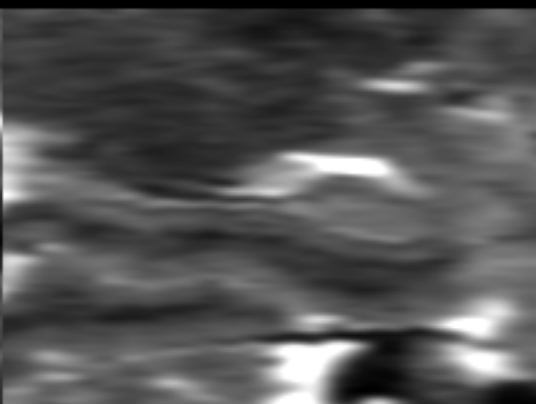

hippunfoldT1

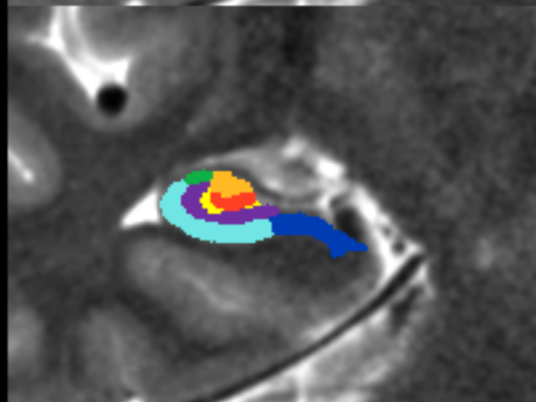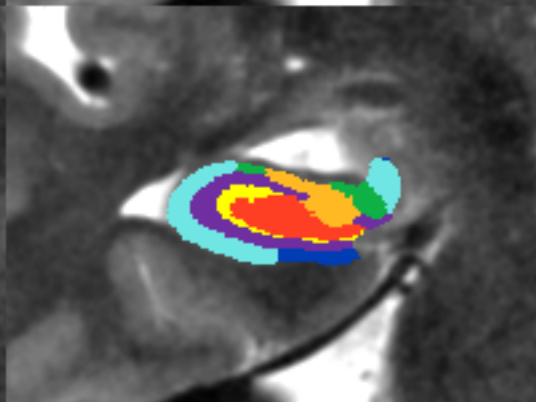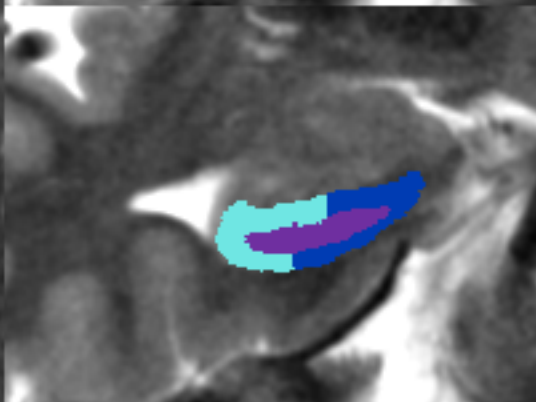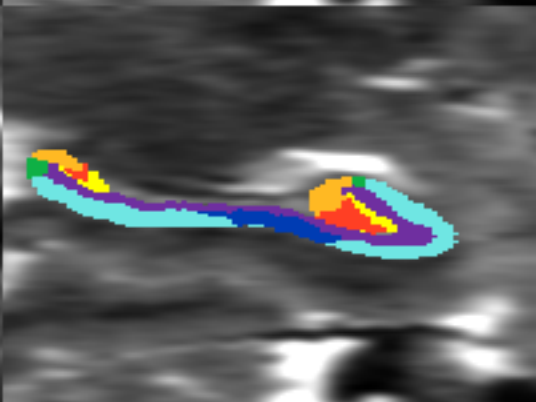

ashs

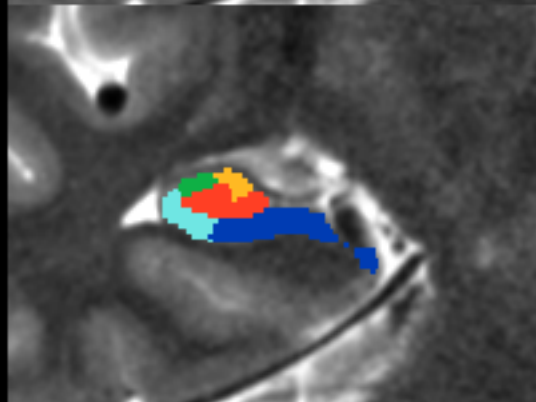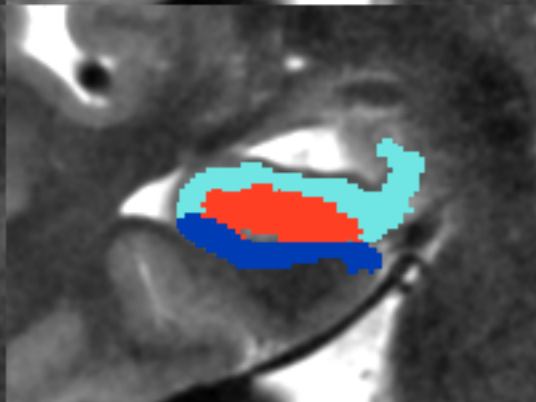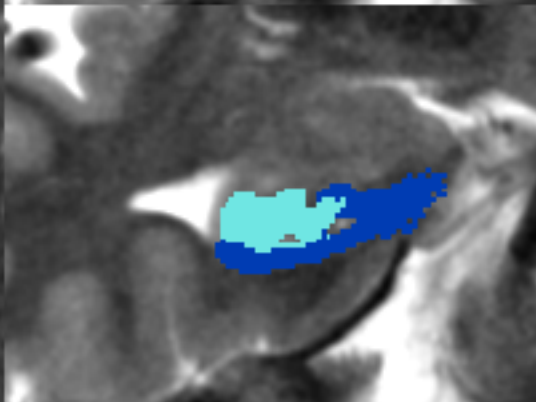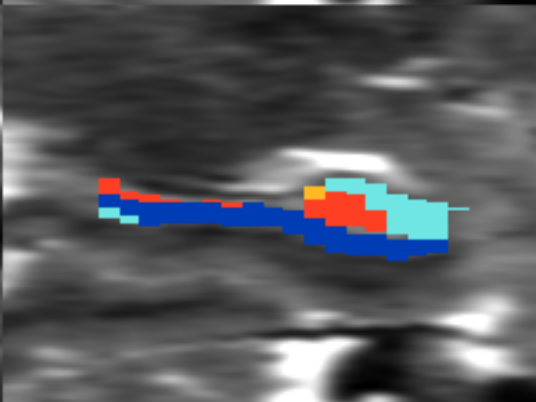

freesurfer

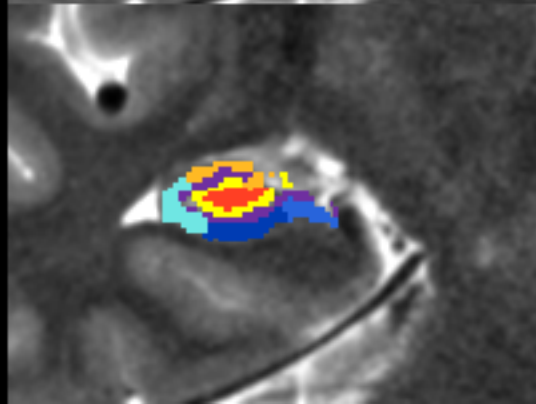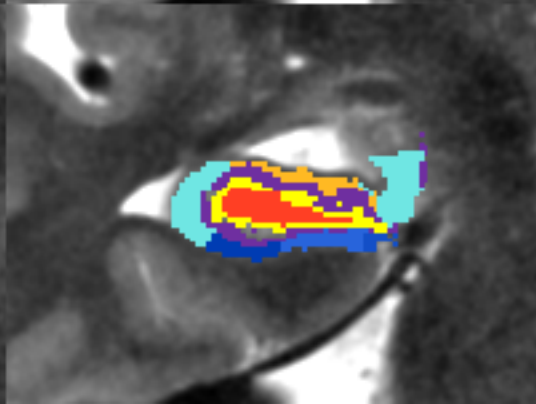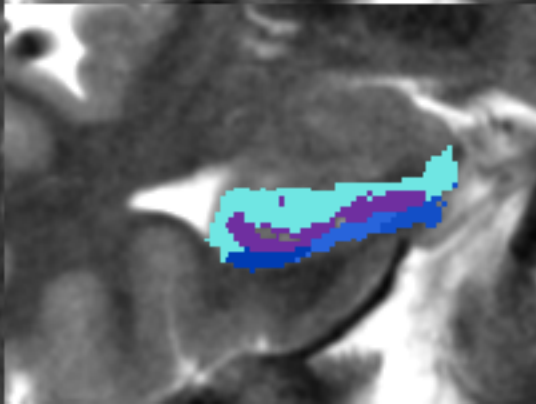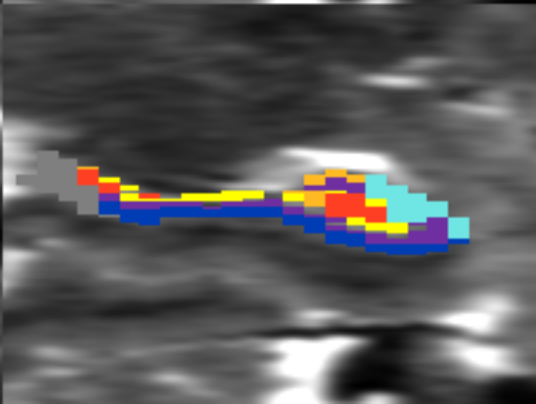

hemi=R,subject=8451275

MRI

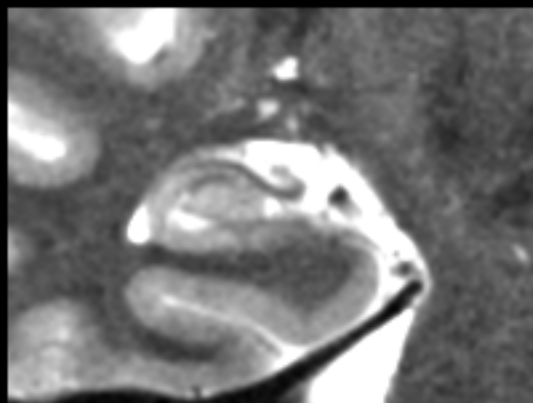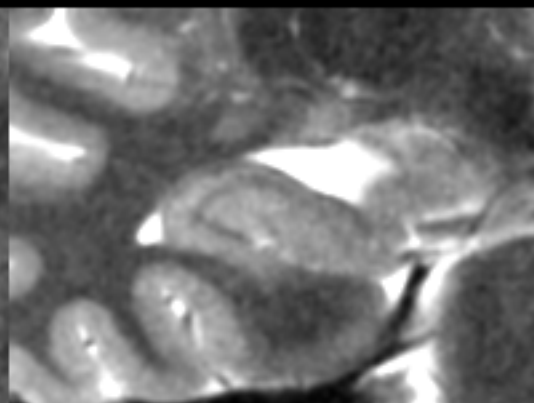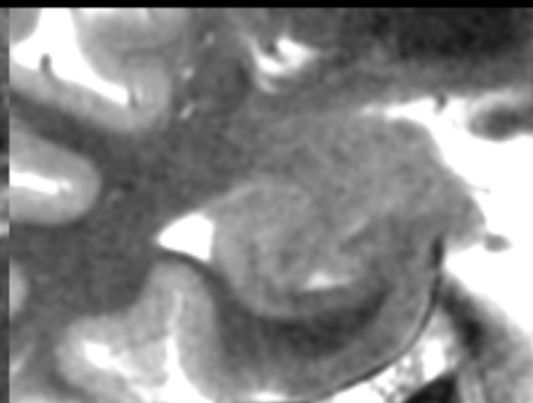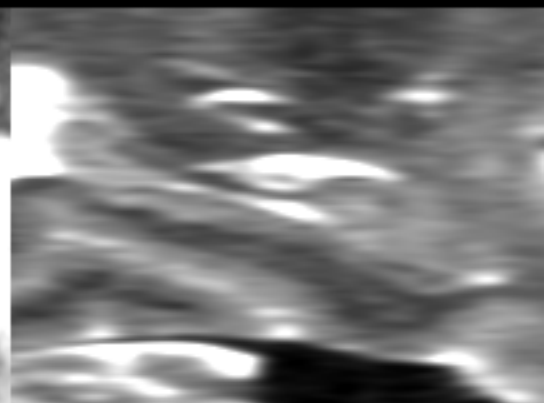

hippunfoldT1

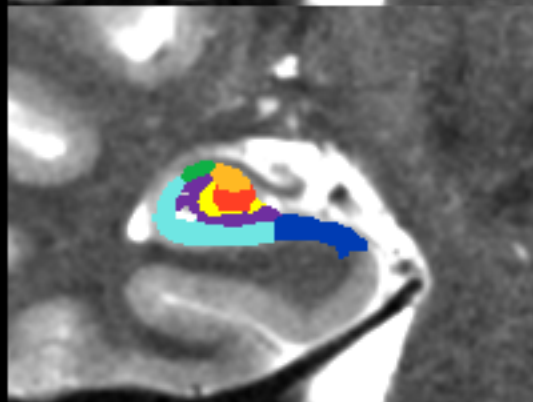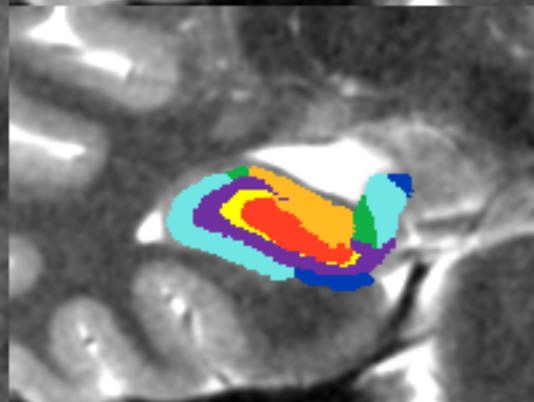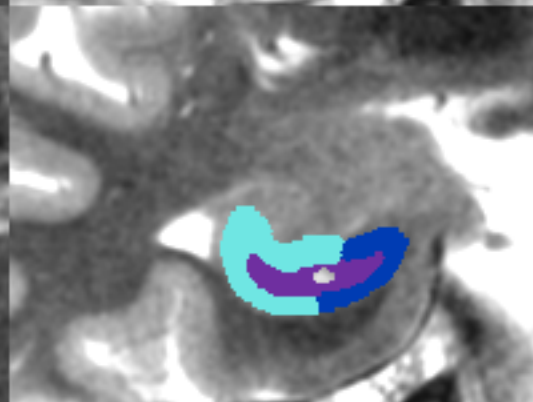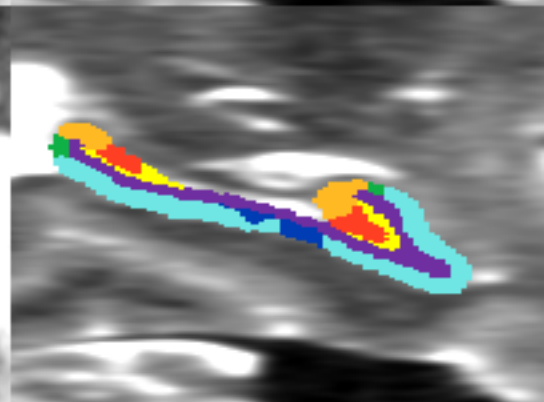

ashs

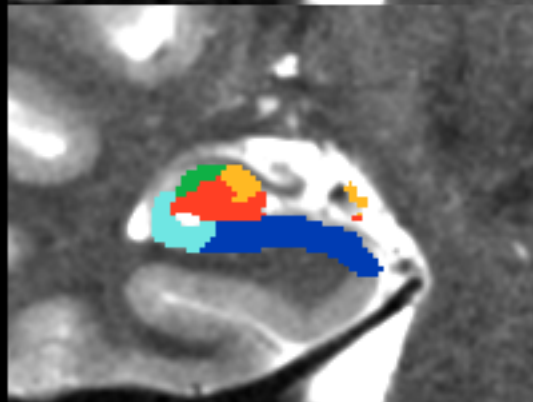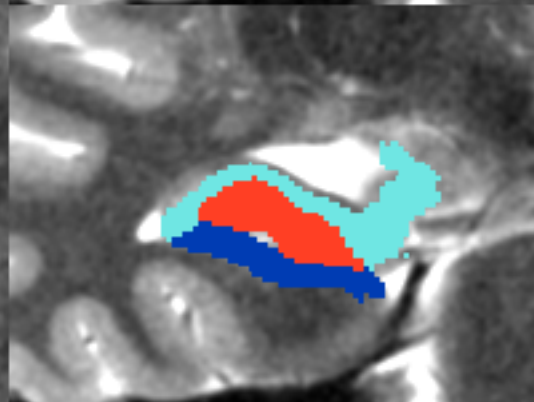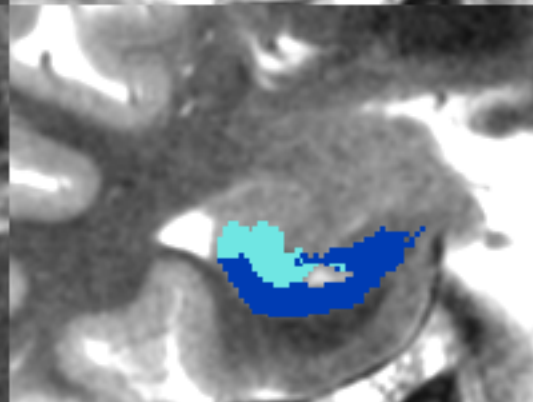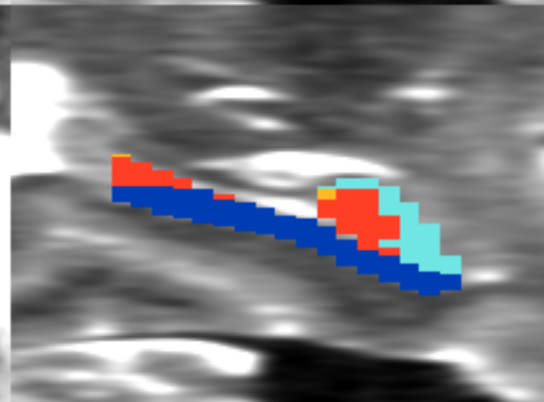

freesurfer

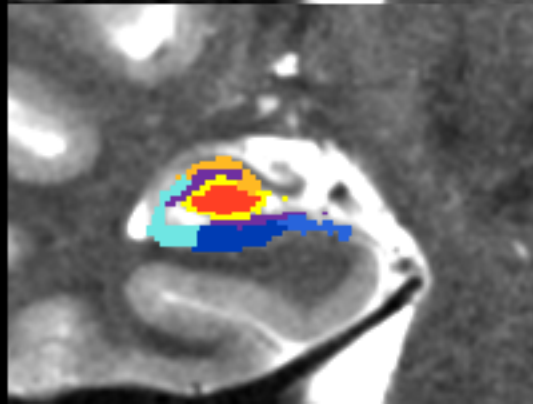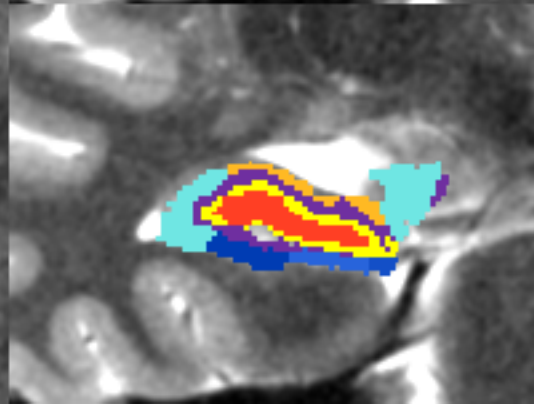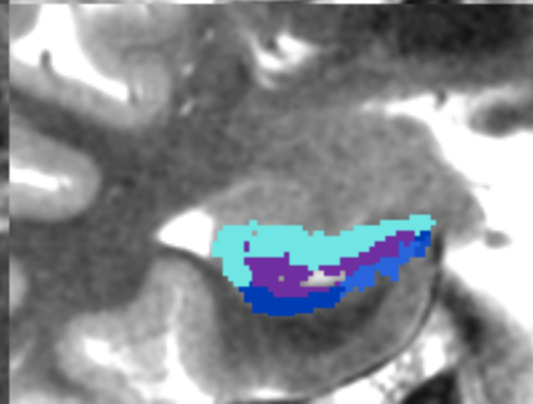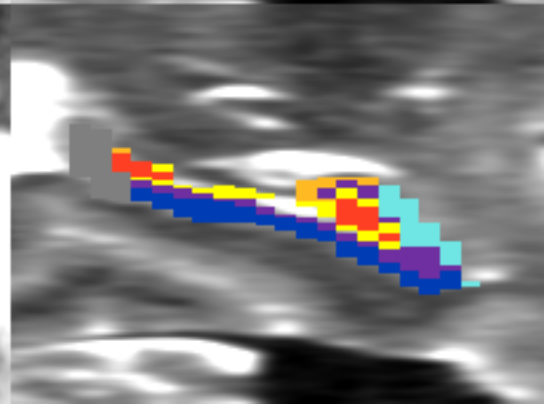

hemi=R,subject=8502872

MRI

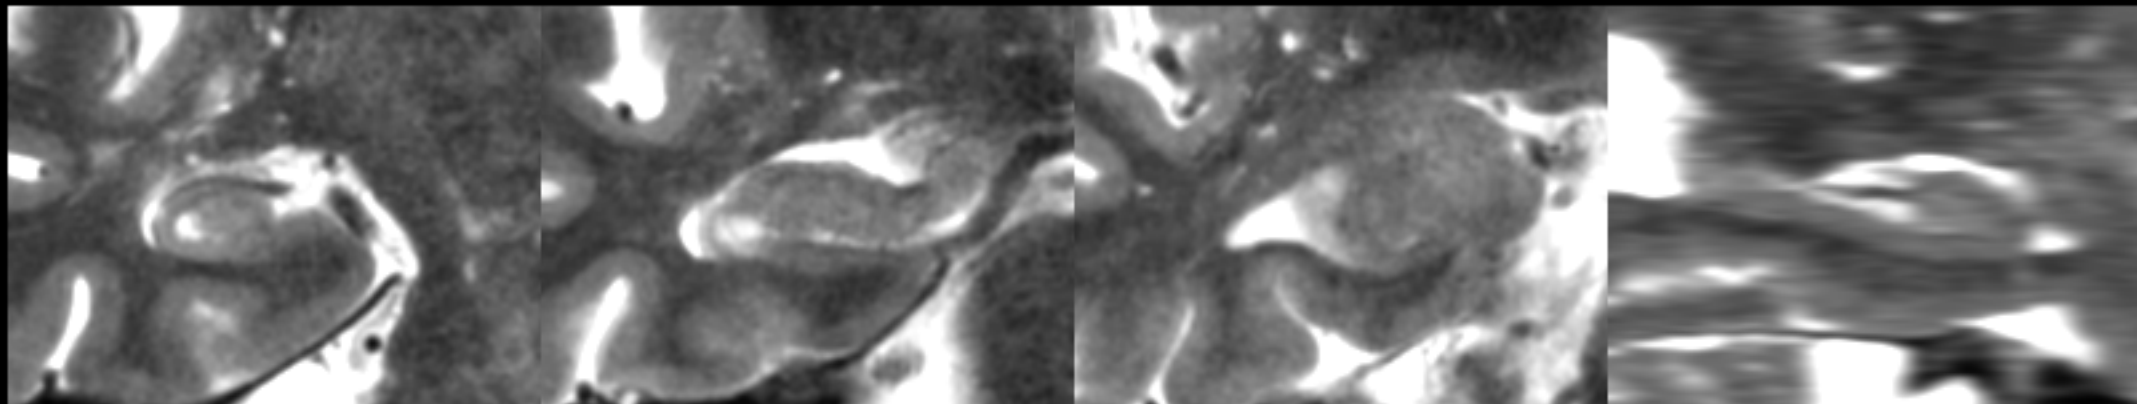

hippunfoldT1

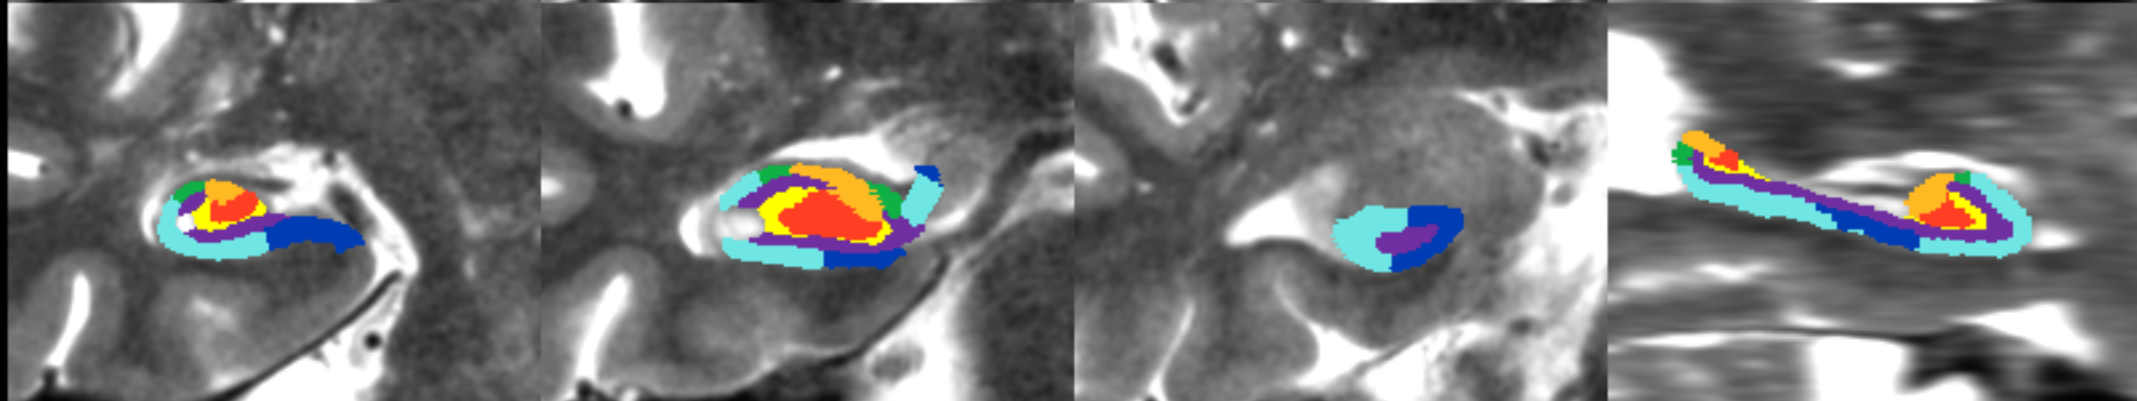

ashs

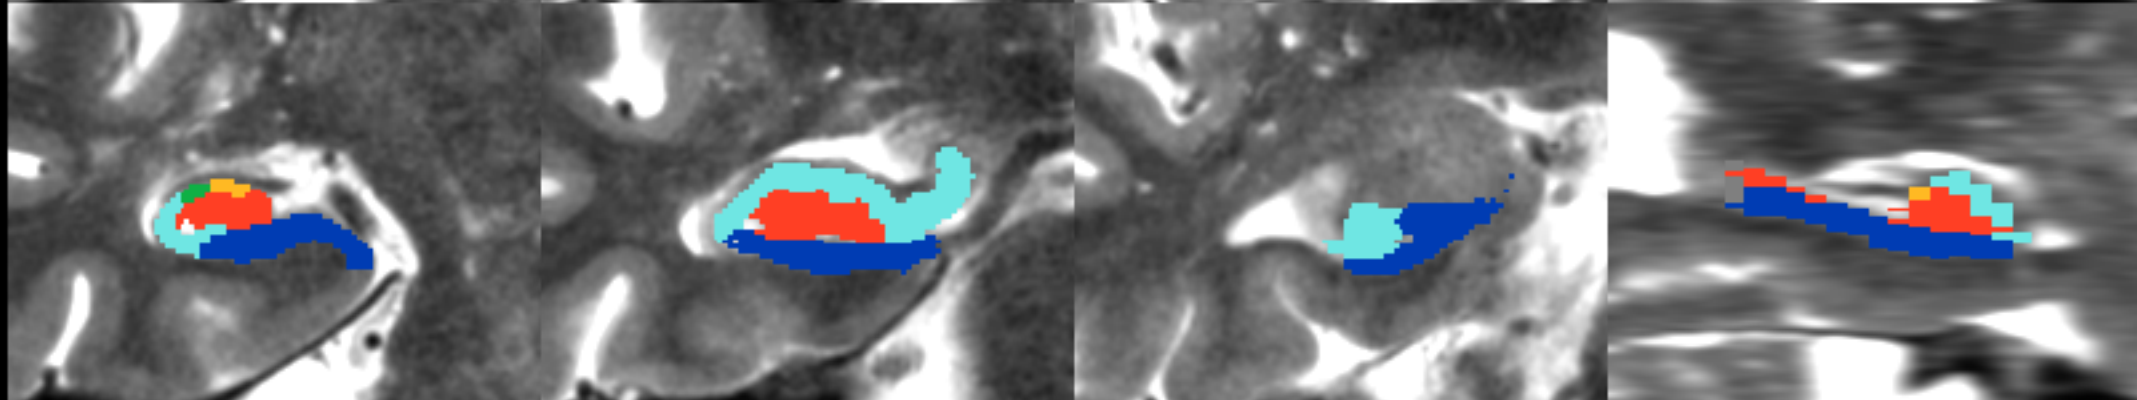

freesurfer

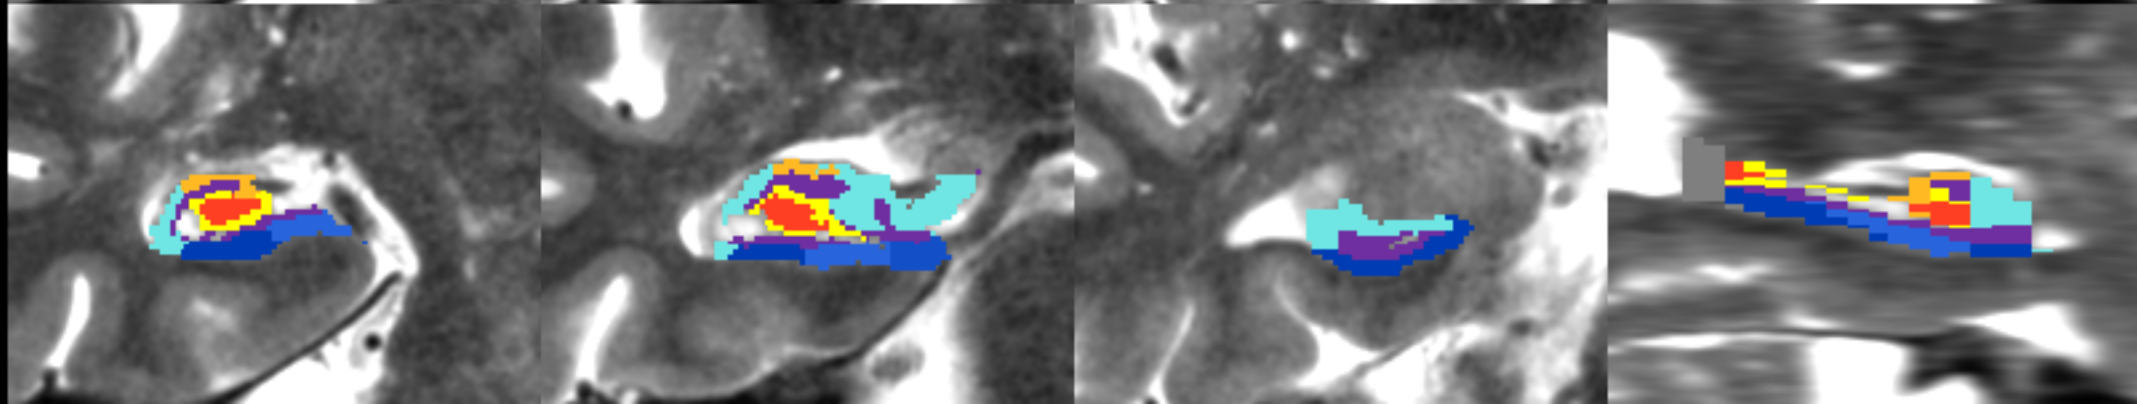

hemi=R,subject=8517582

MRI

hippunfoldT1

ashs

freesurfer

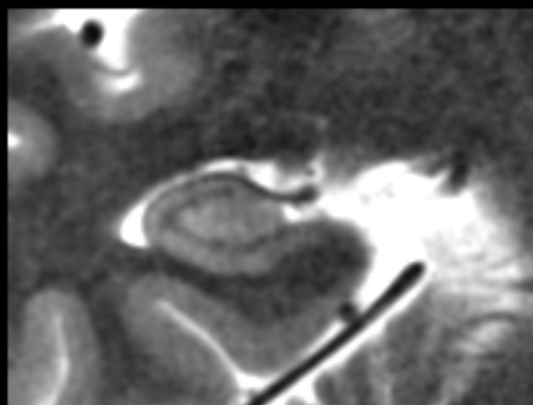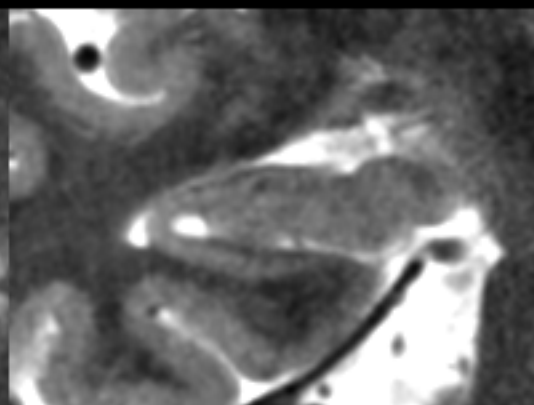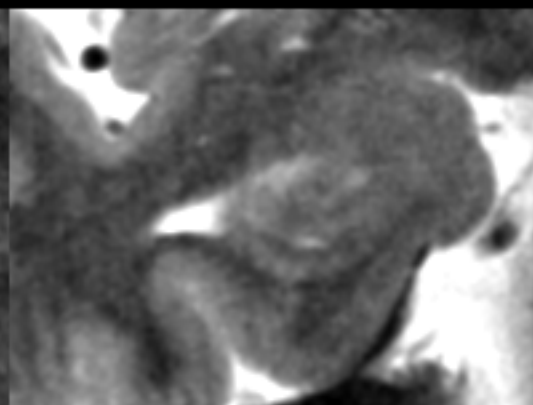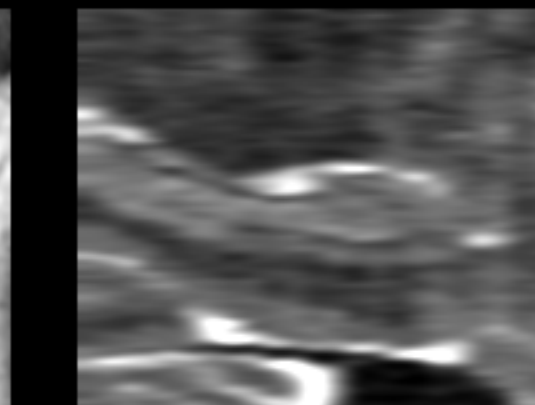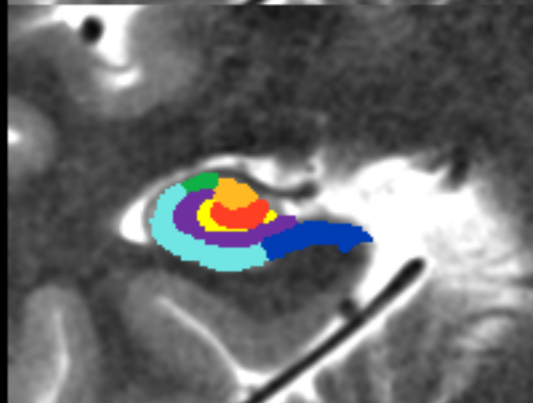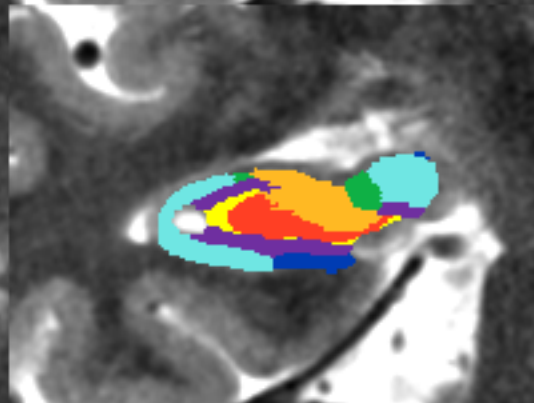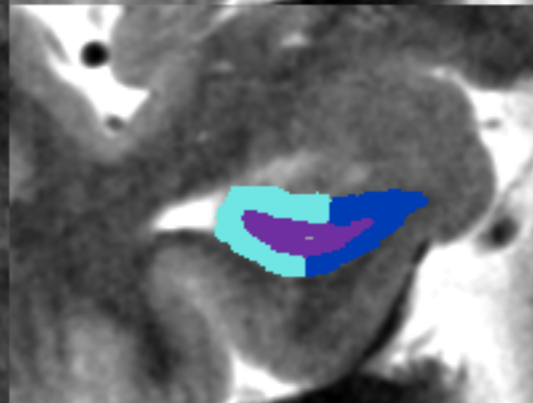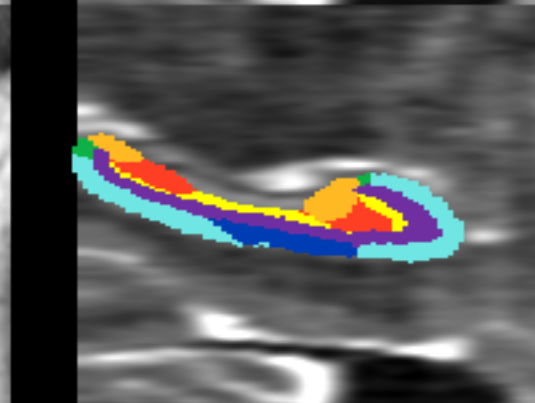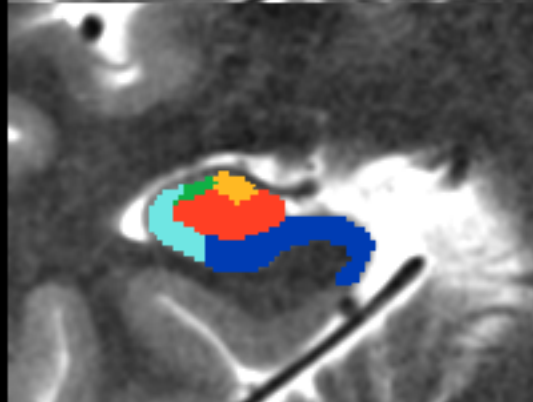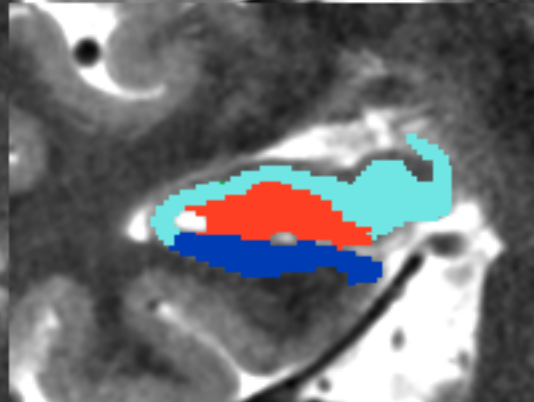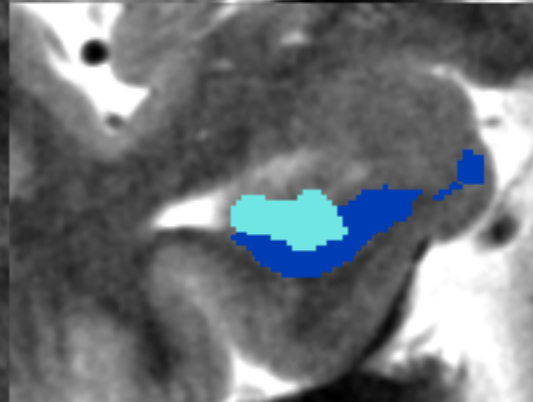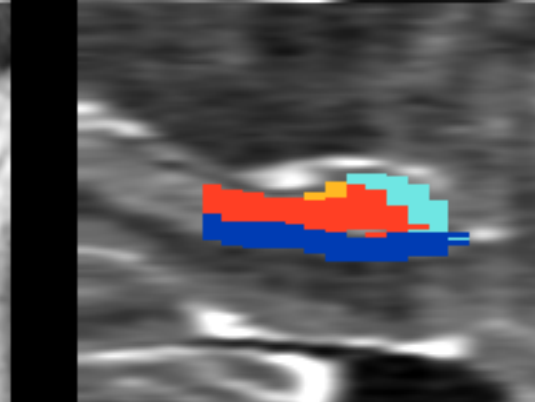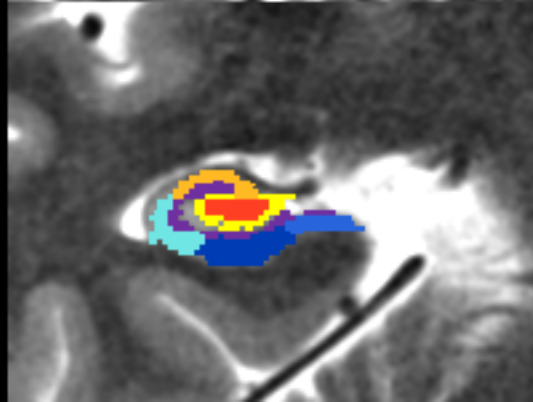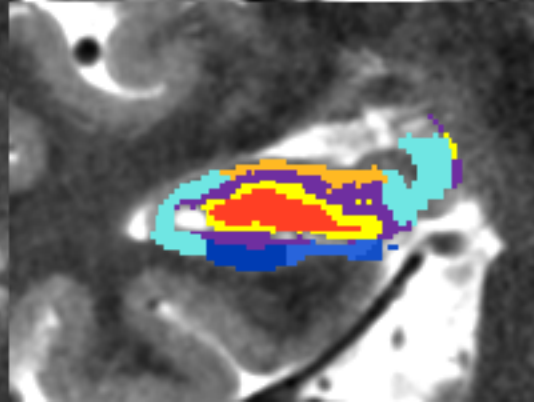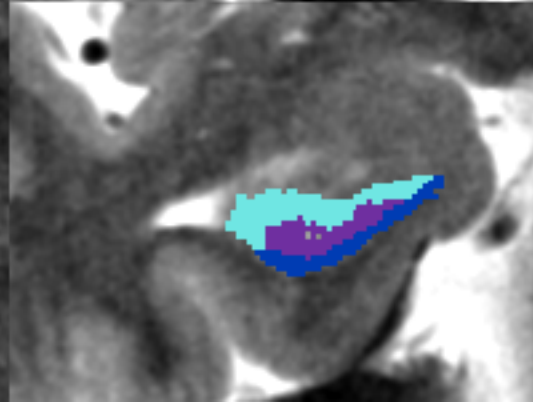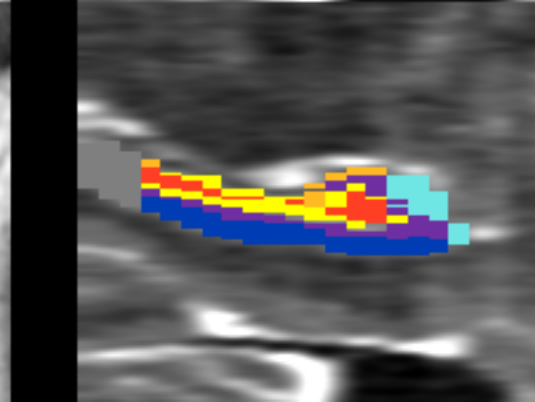

hemi=R,subject=8623581

MRI

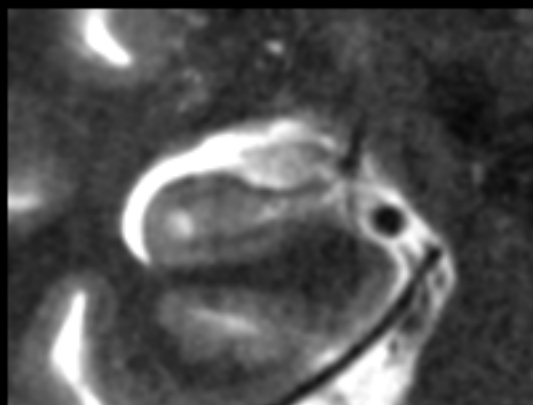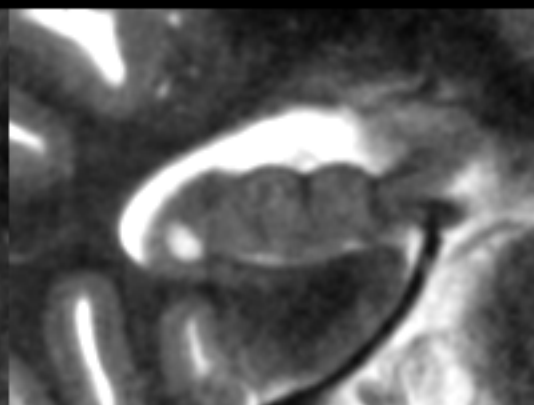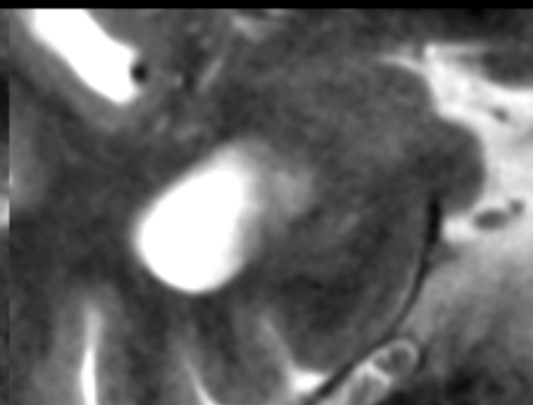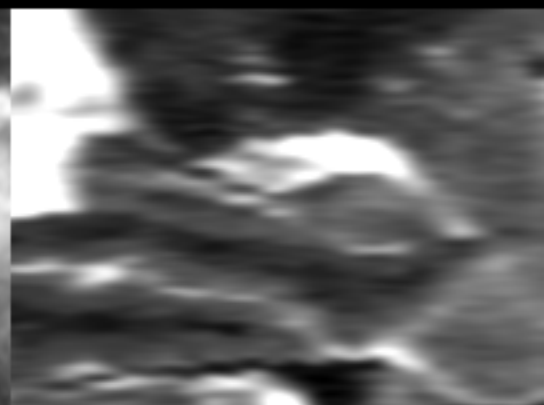

hippunfoldT1

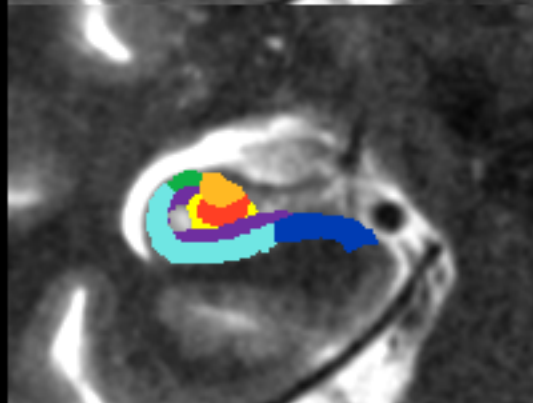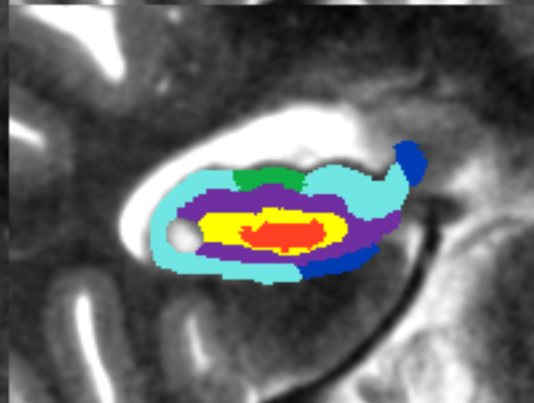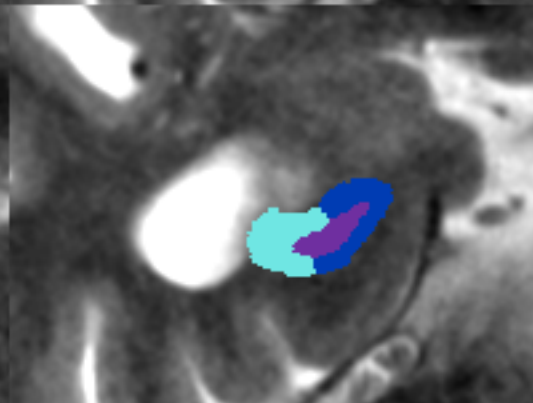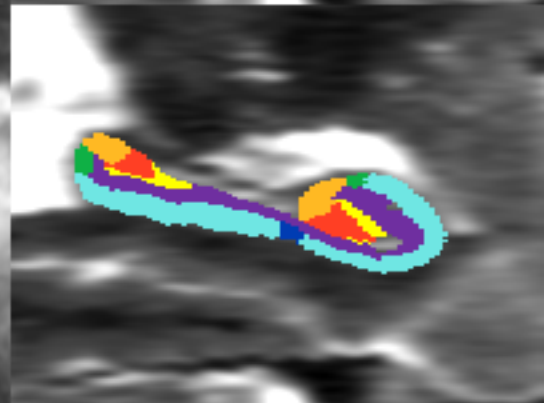

ashes

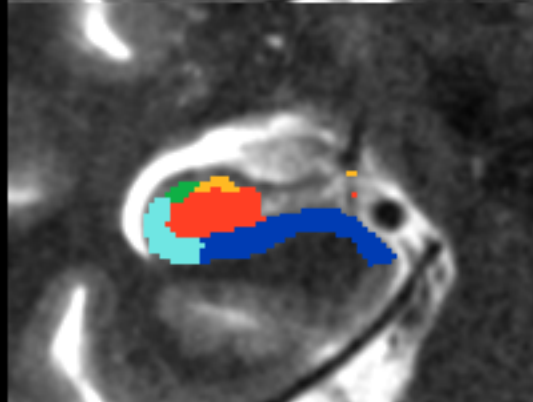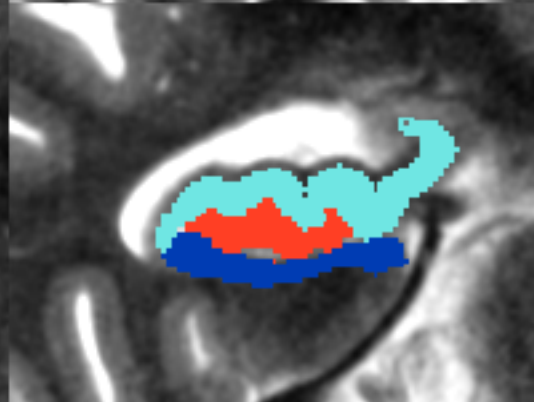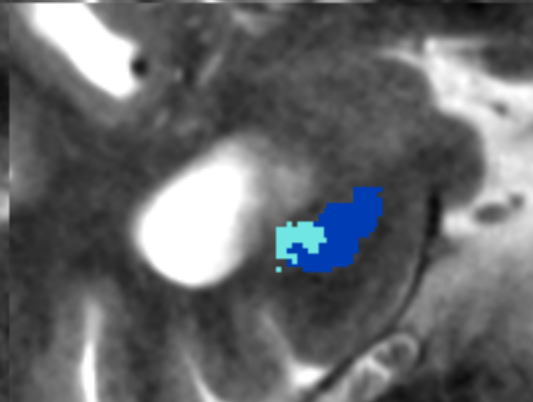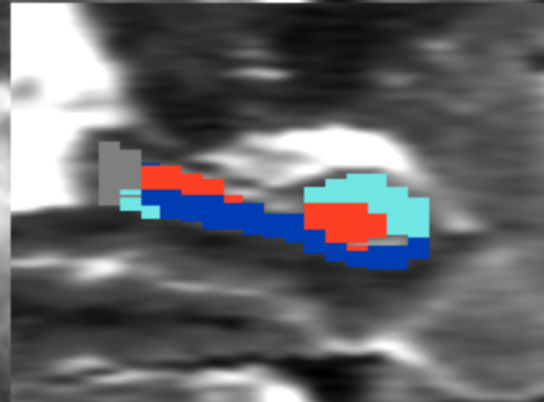

freesurfer

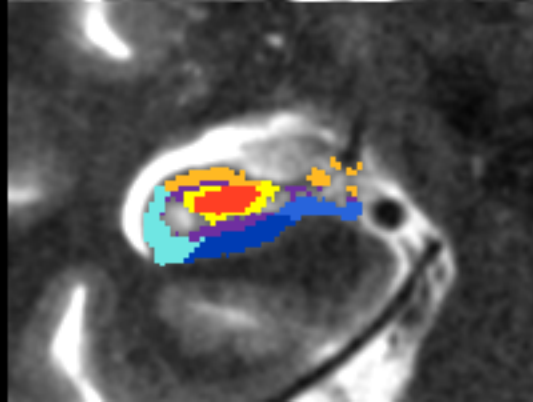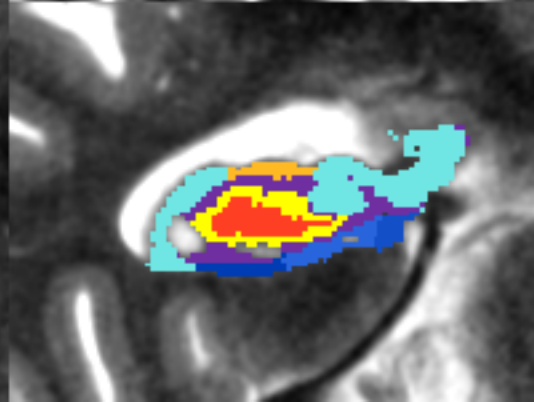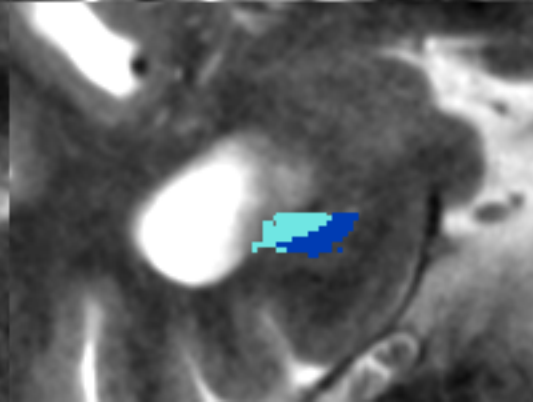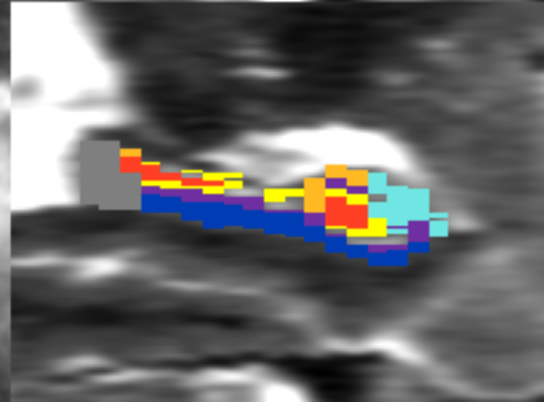

hemi=R,subject=8699817

MRI

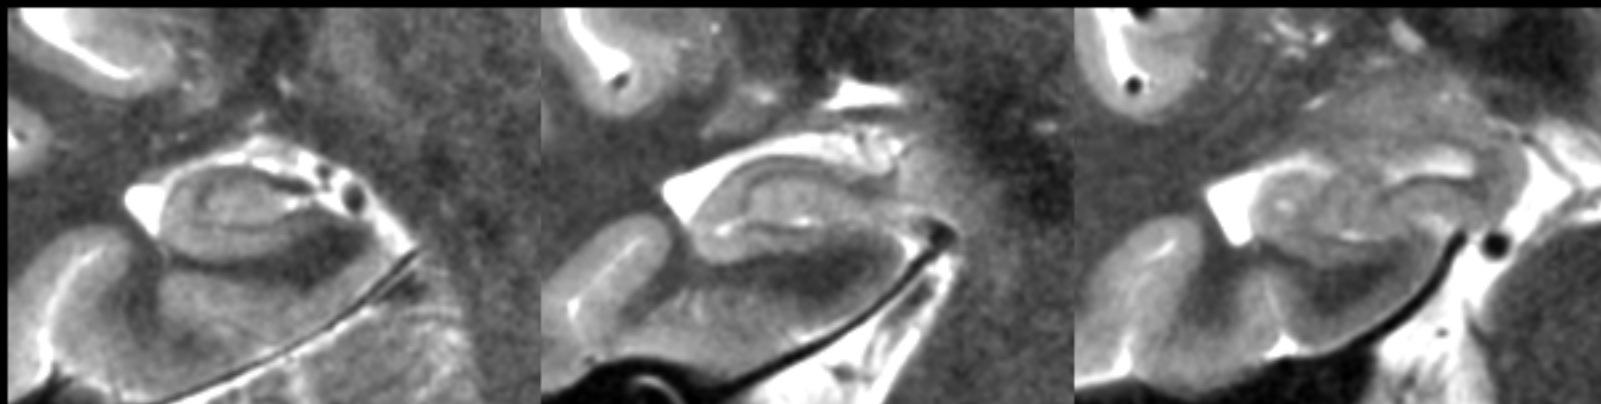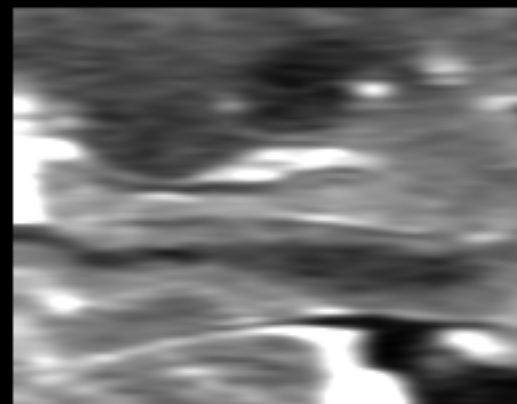

hippunfoldT1

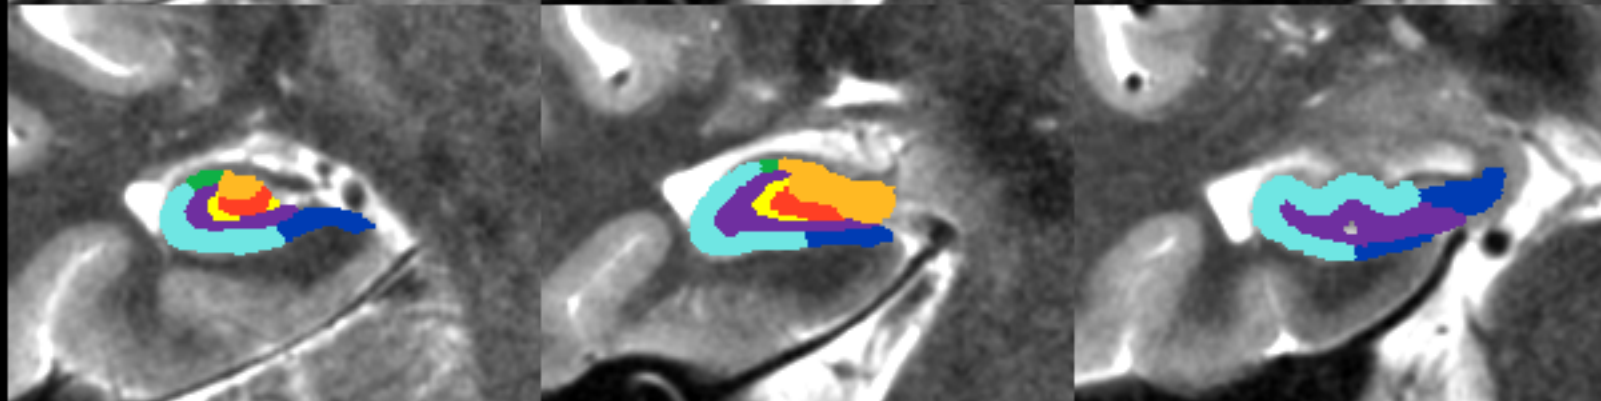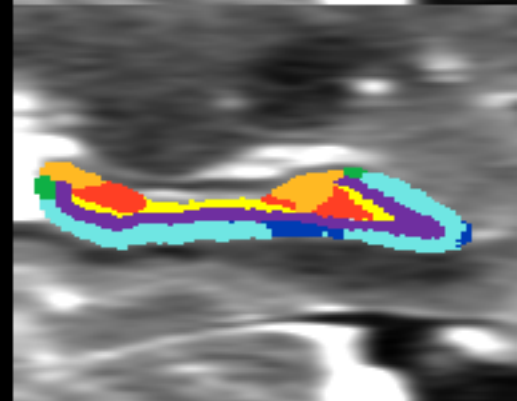

ashs

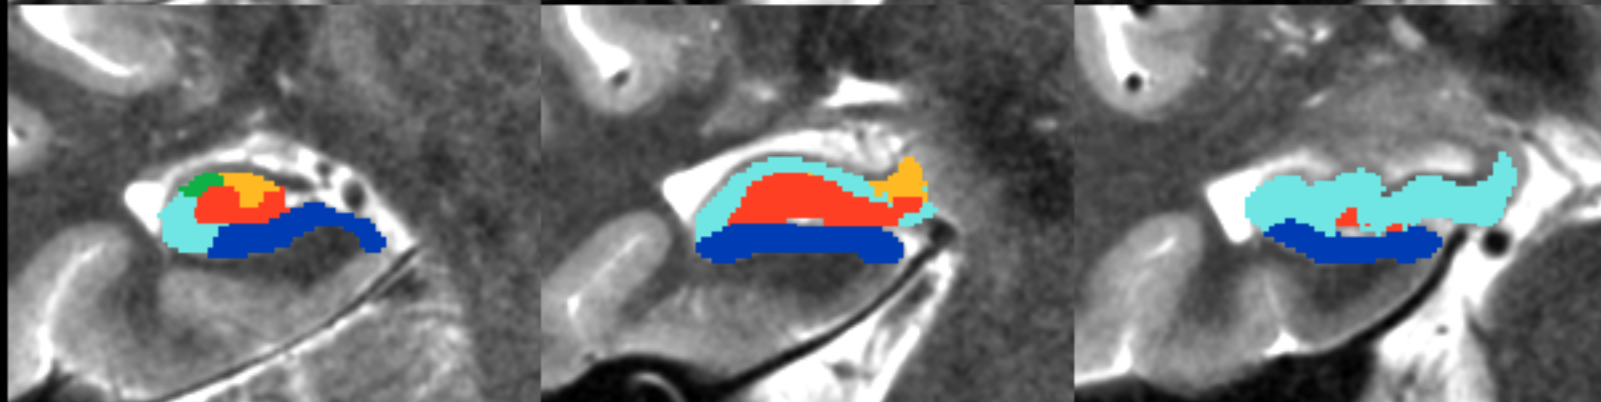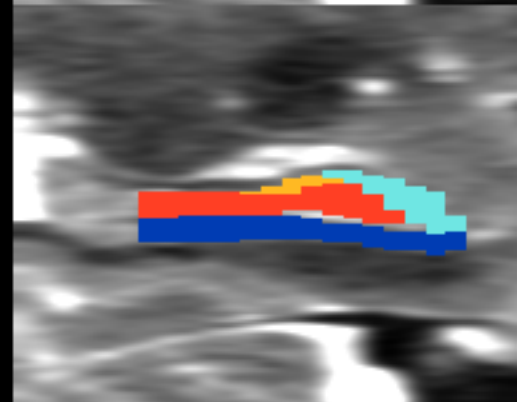

freesurfer

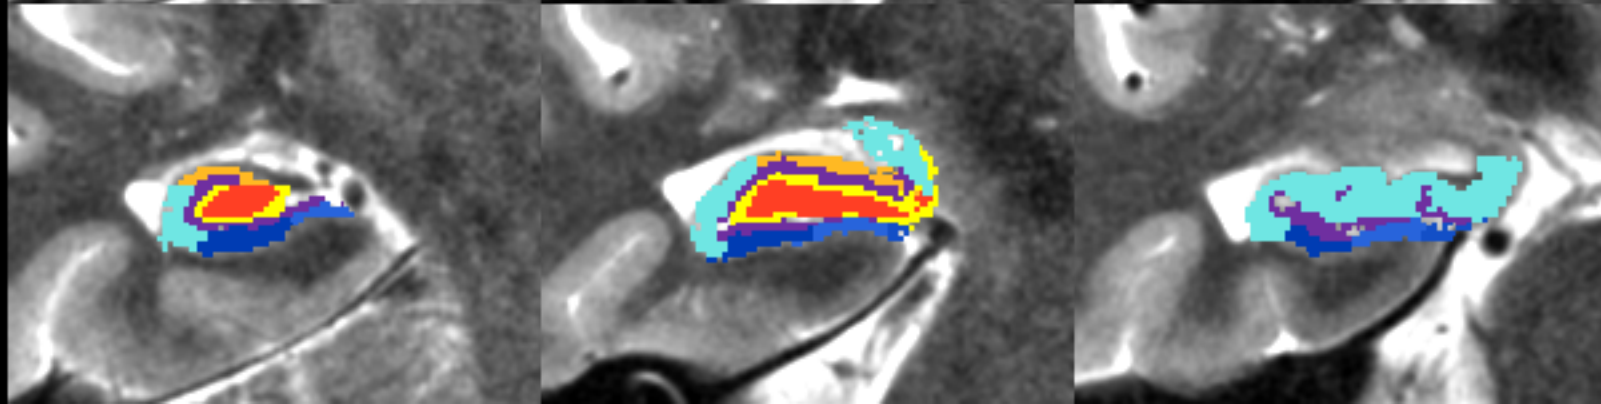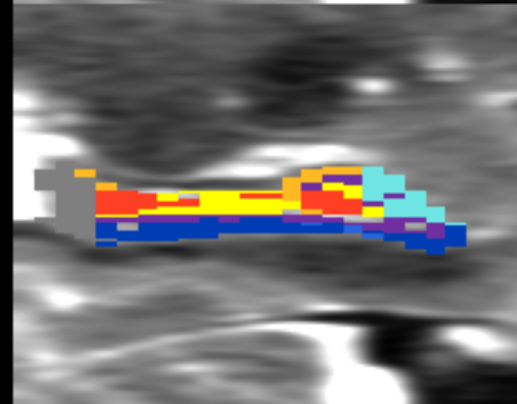

hemi=R,subject=8724991

MRI

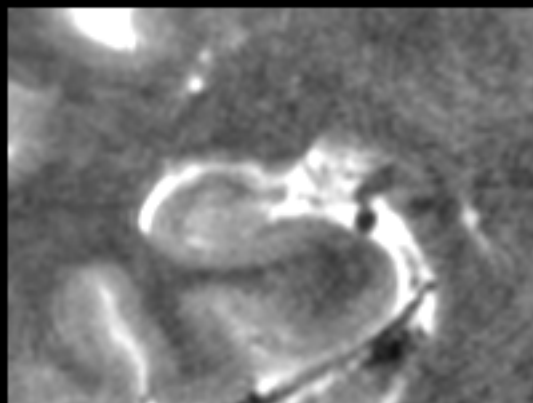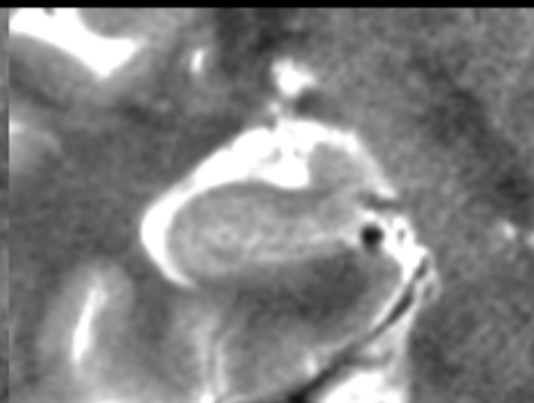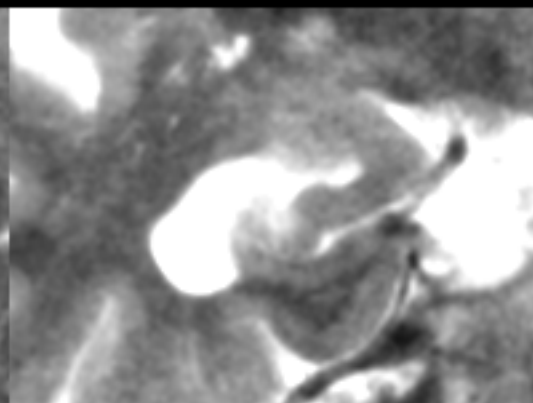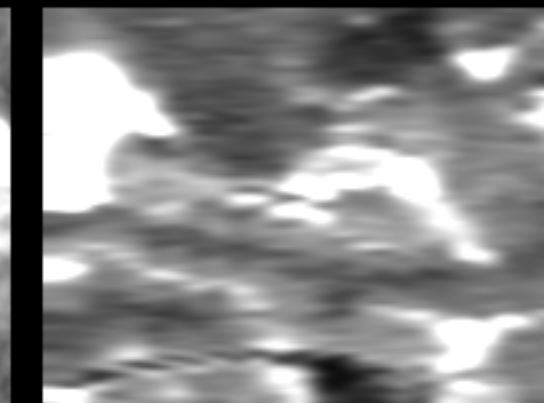

hippunfoldT1

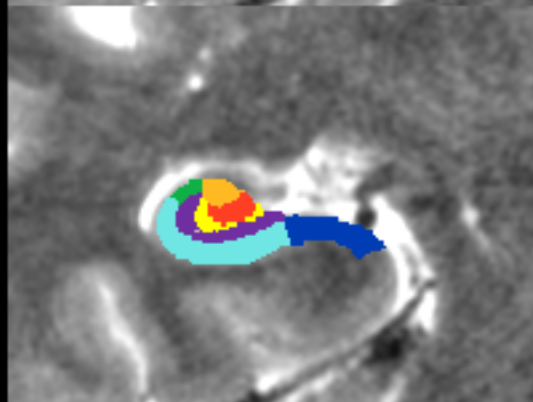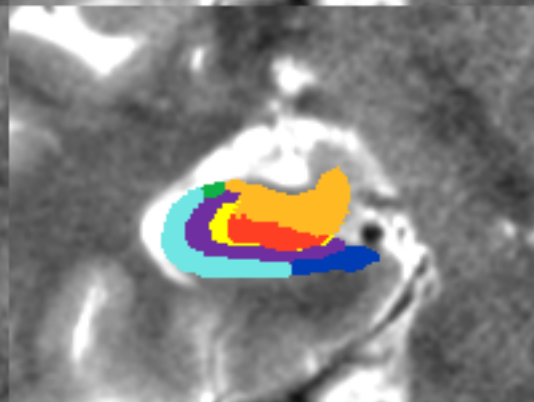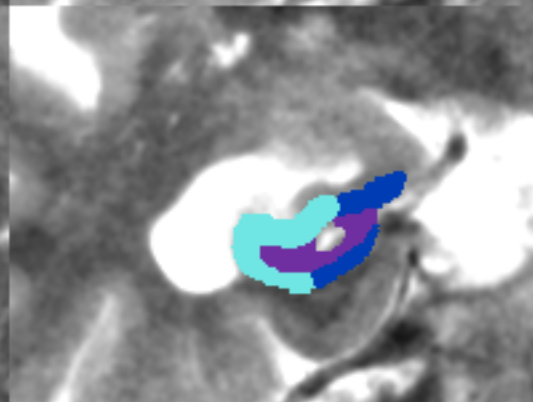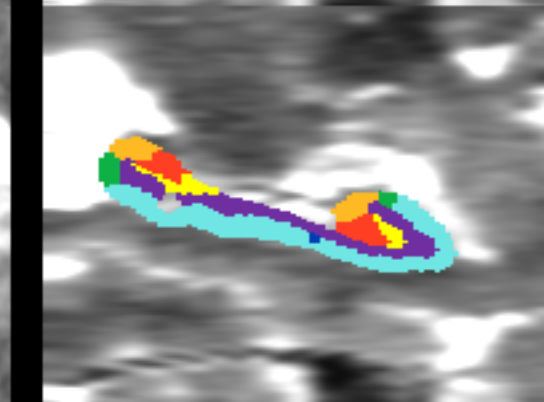

ashs

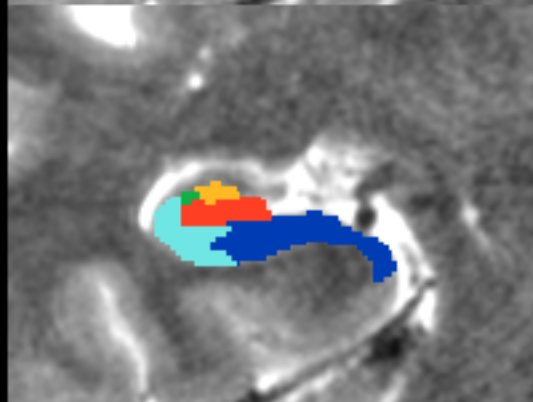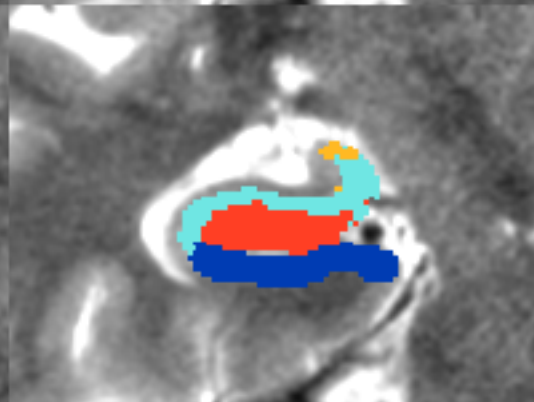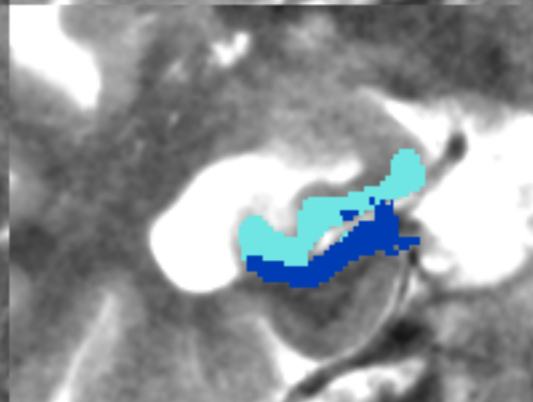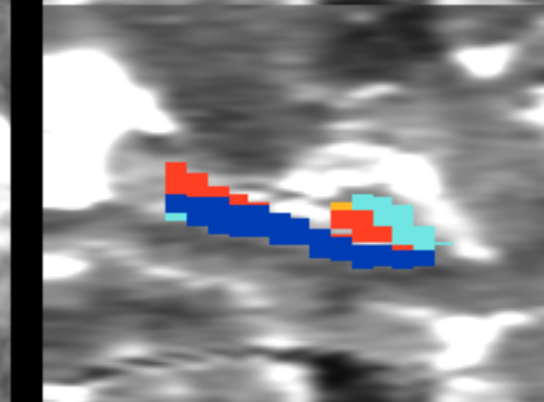

freesurfer

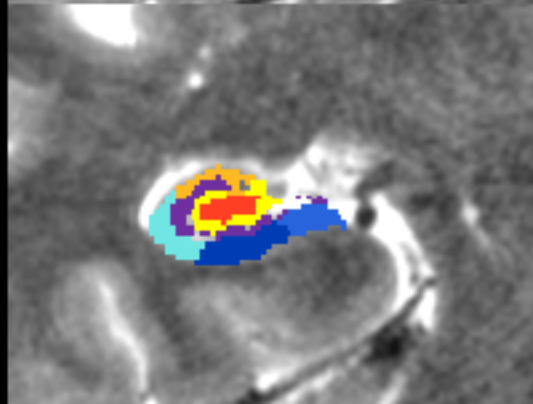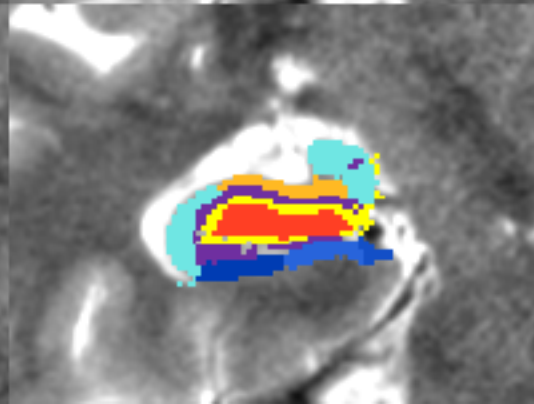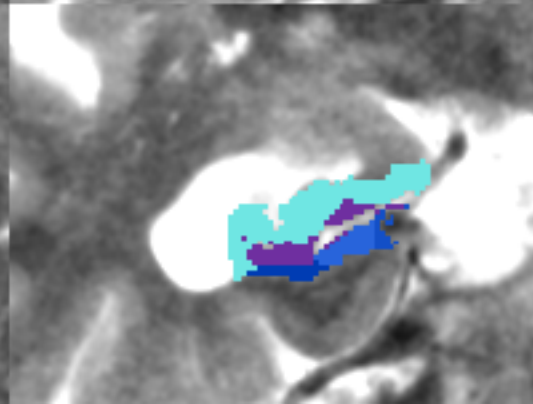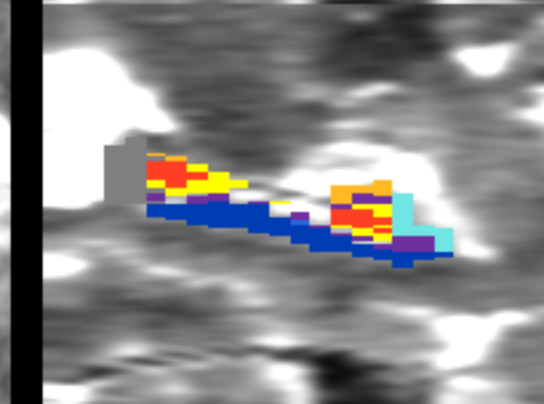



hemi=R,subject=8749907

MRI

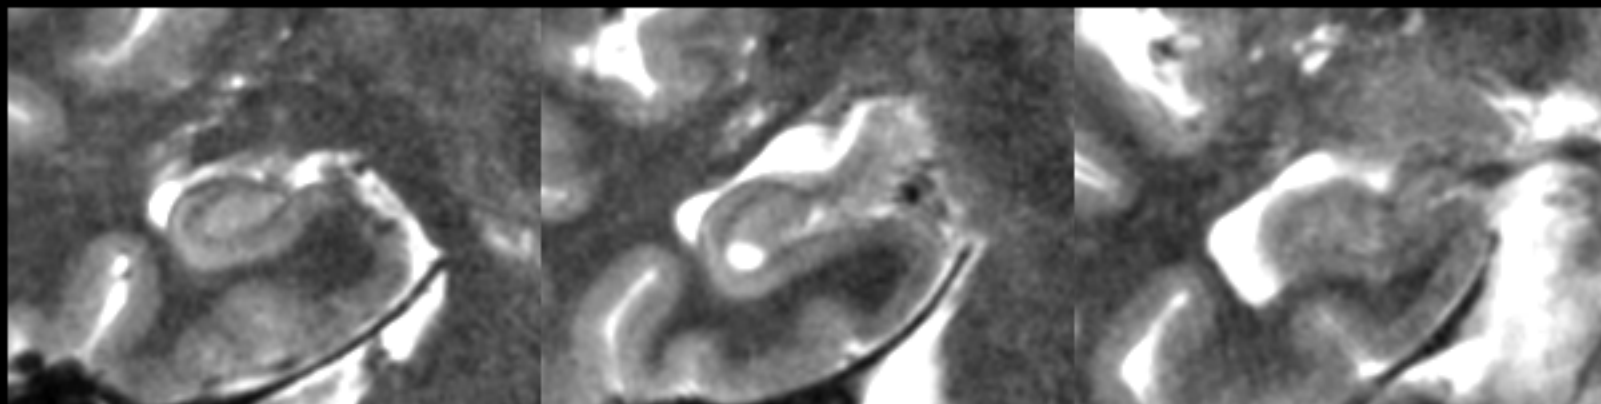

hippunfoldT1

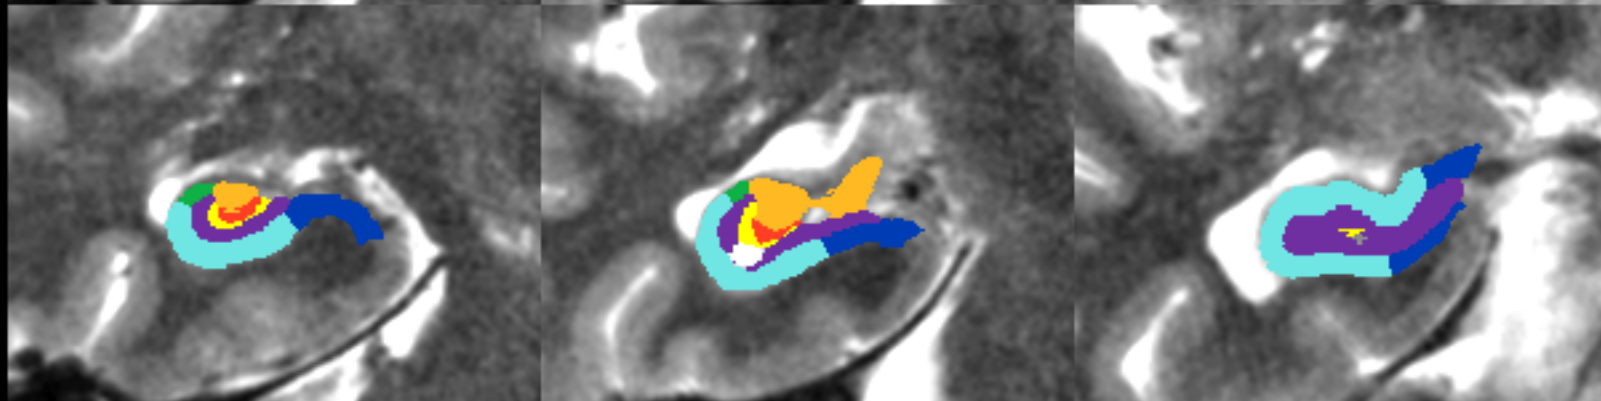

ashs

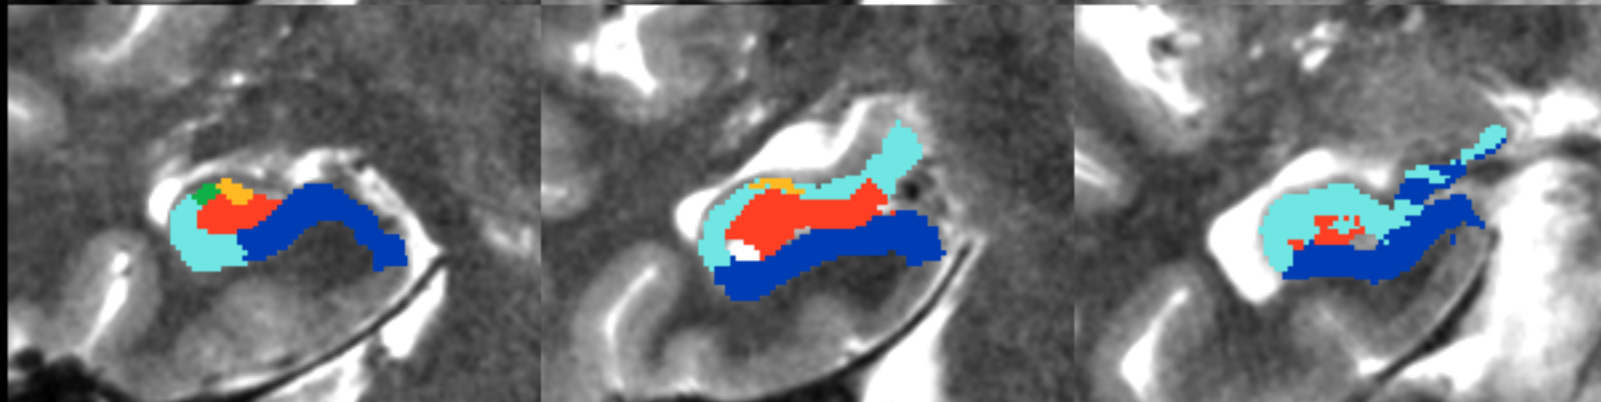

freesurfer

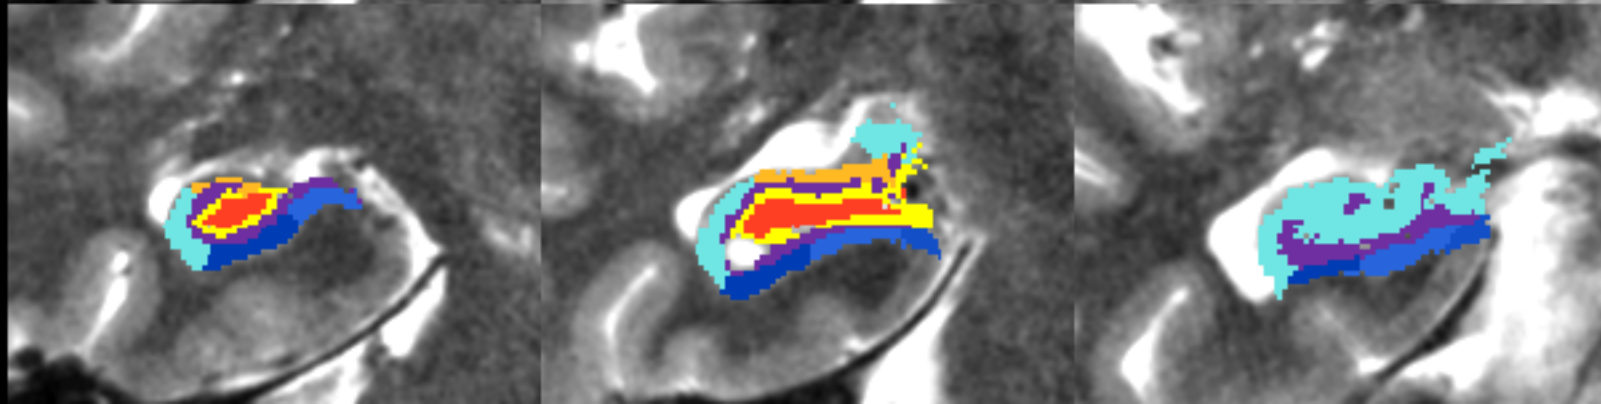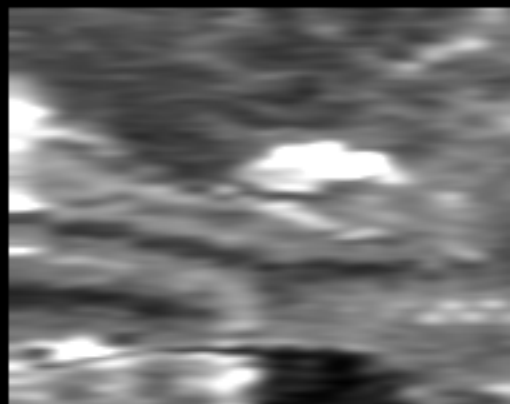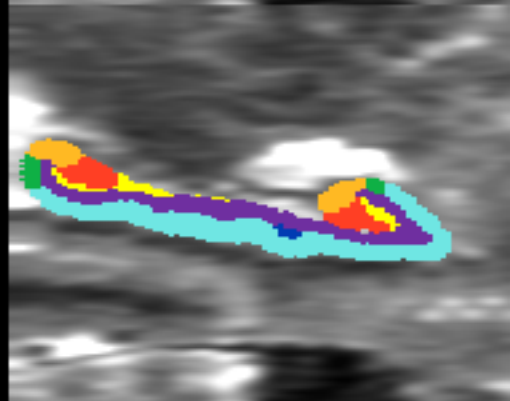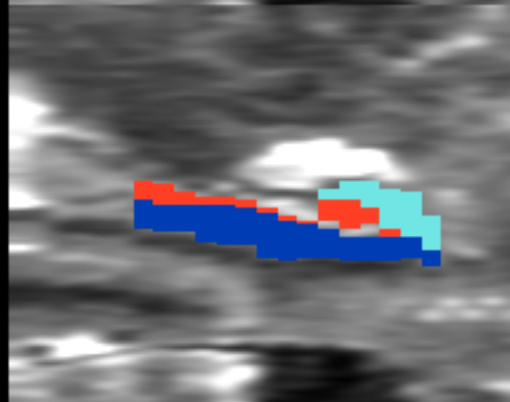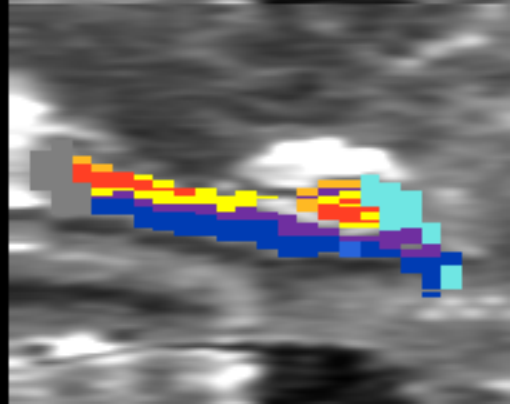

hemi=R,subject=8796916

MRI

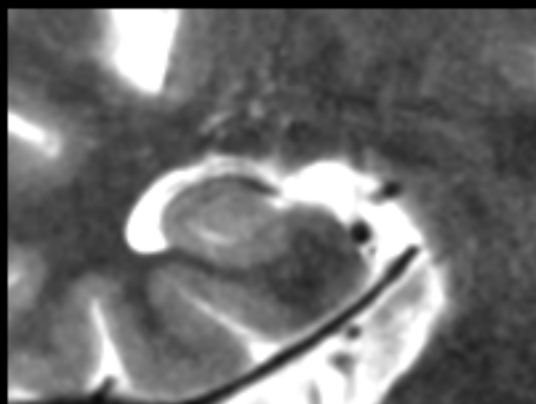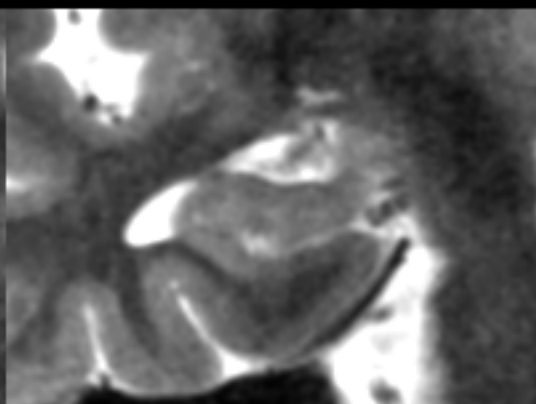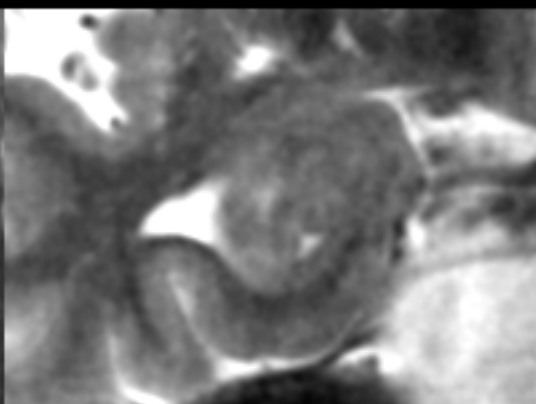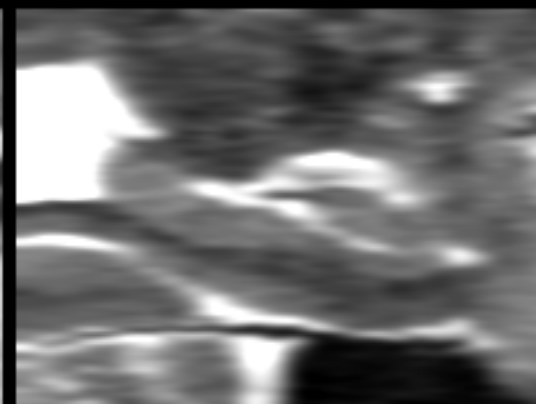

hippunfoldT1

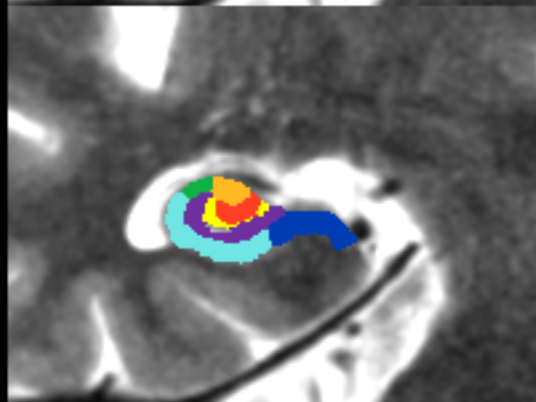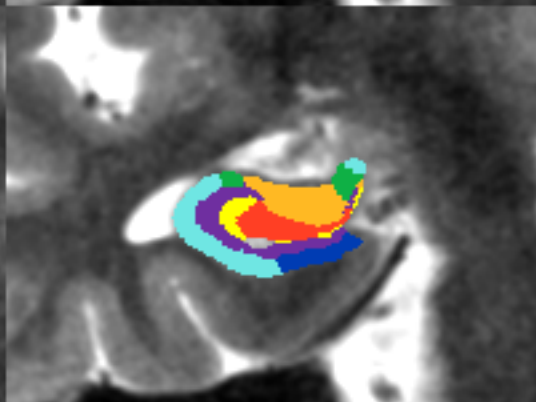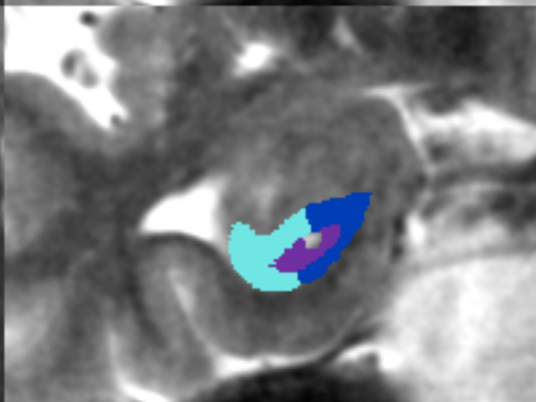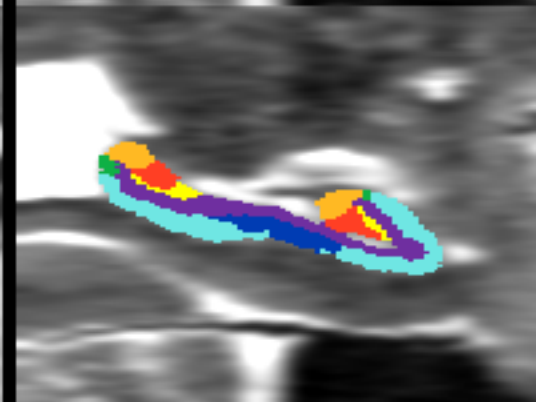

ashs

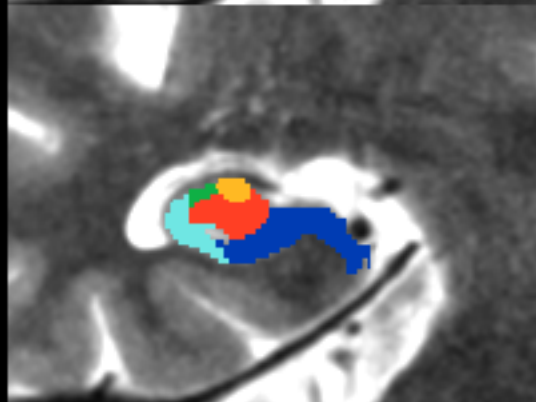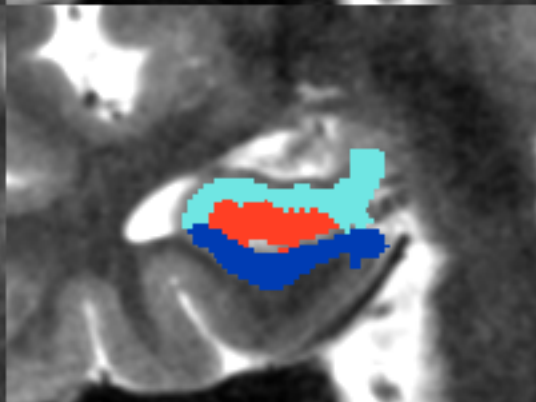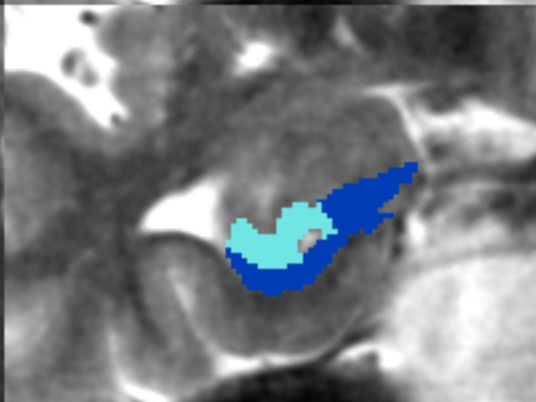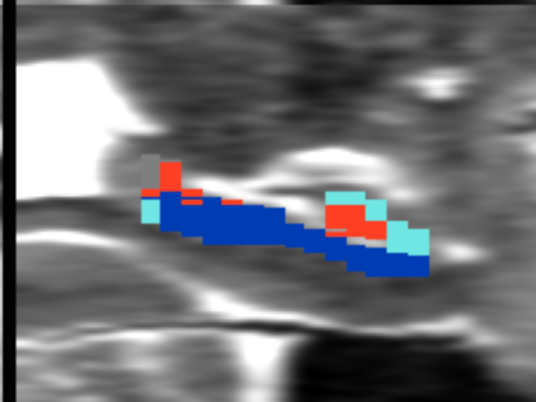

freesurfer

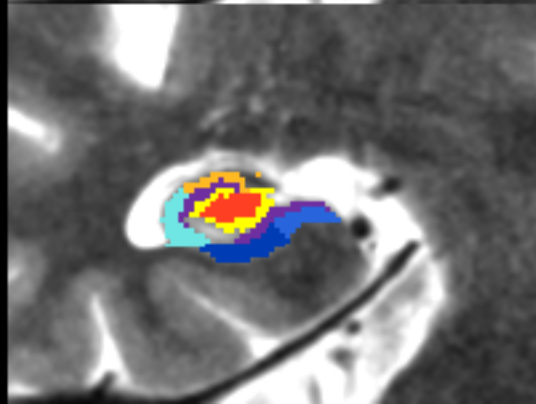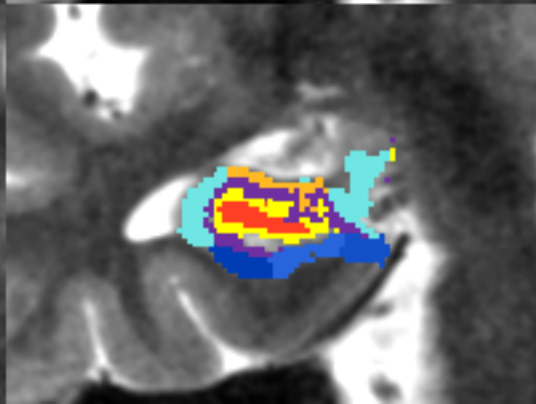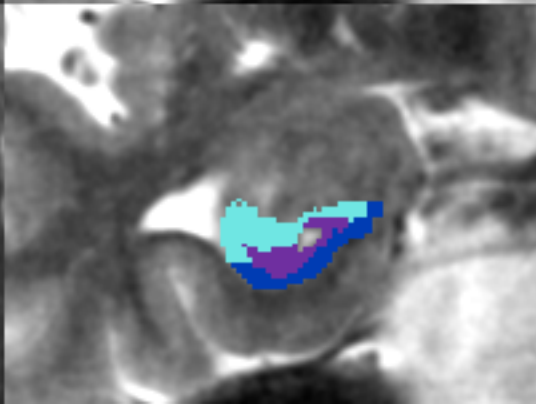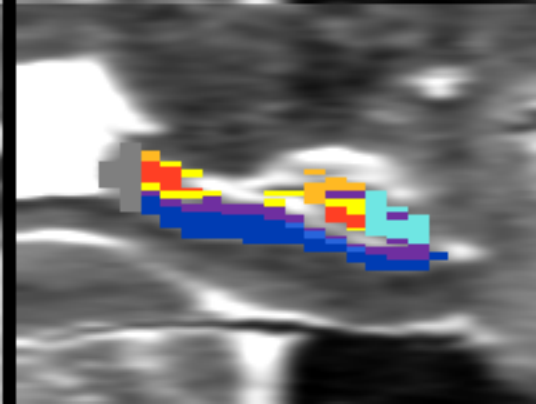

hemi=R,subject=8854398

MRI

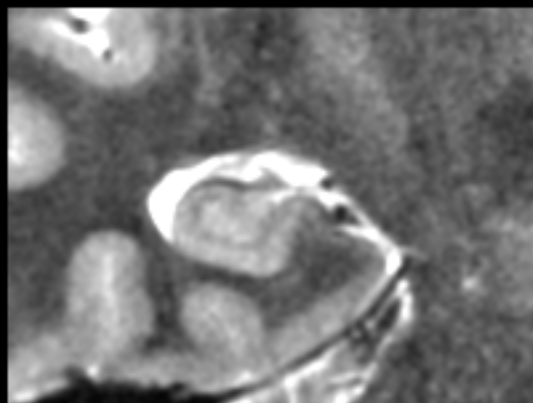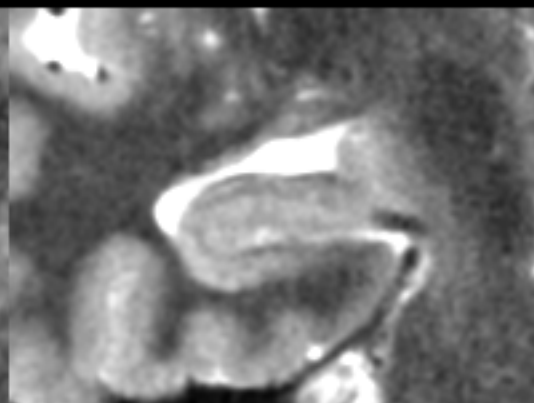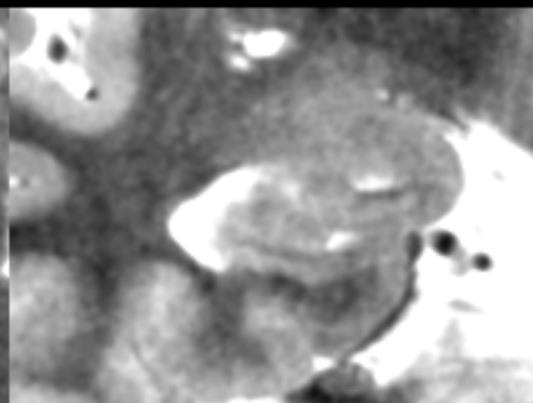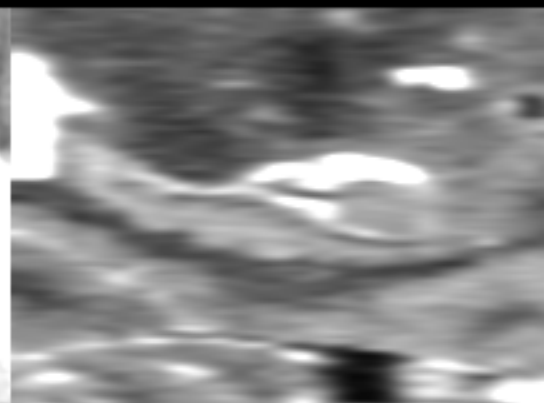

hippunfoldT1

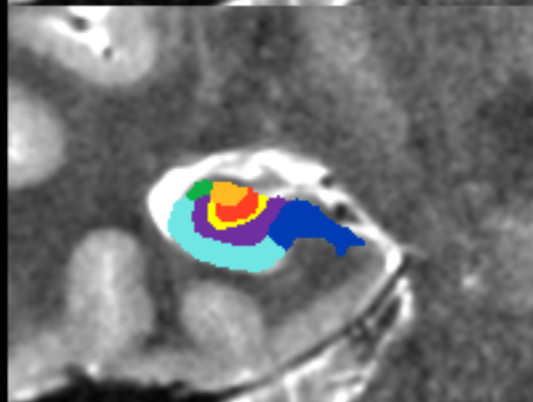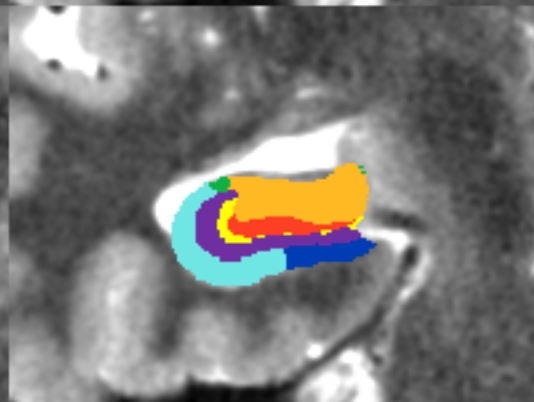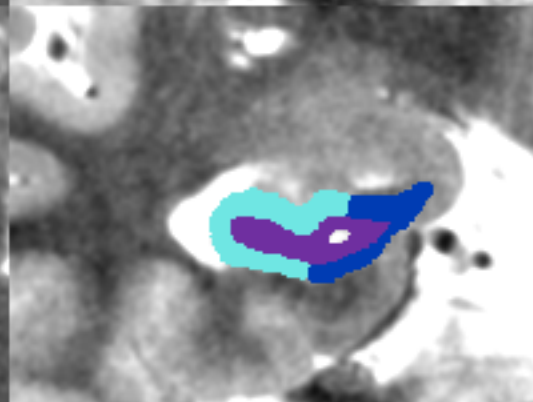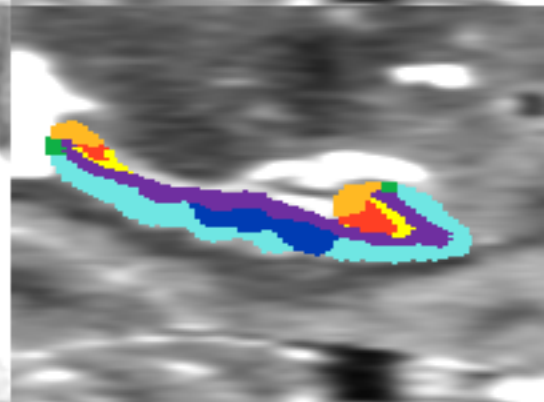

ashs

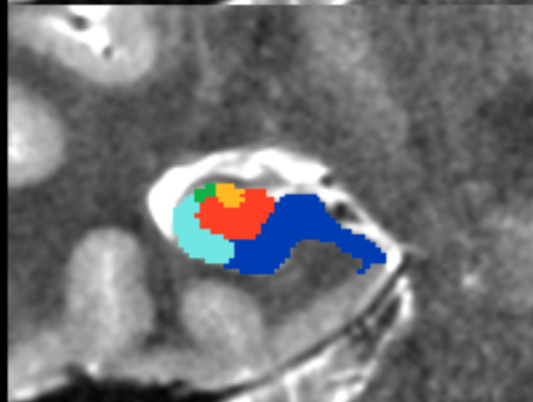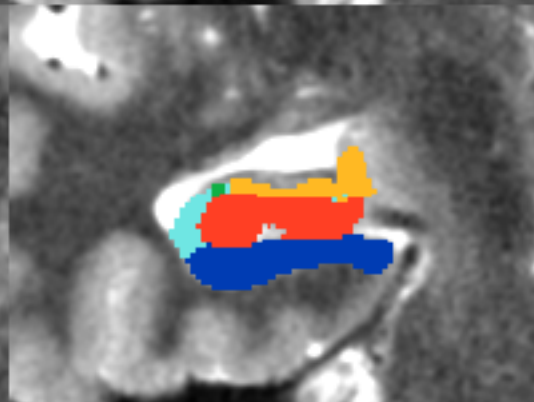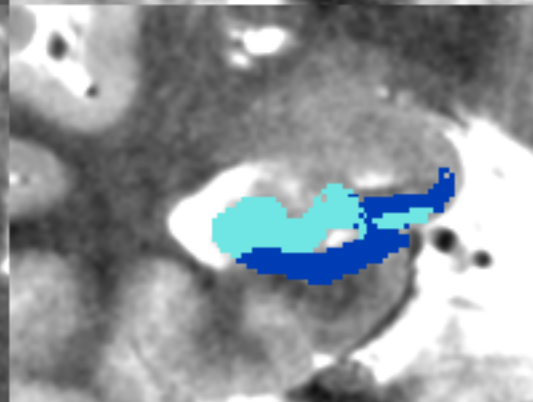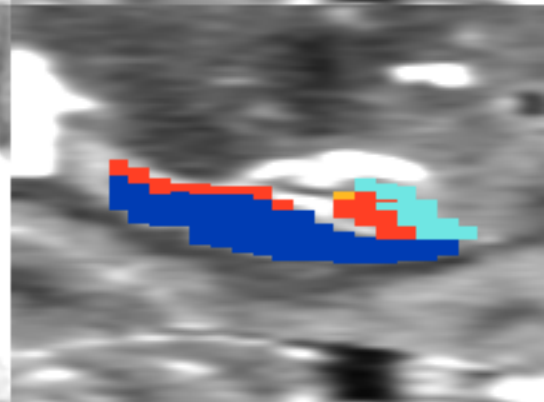

freesurfer

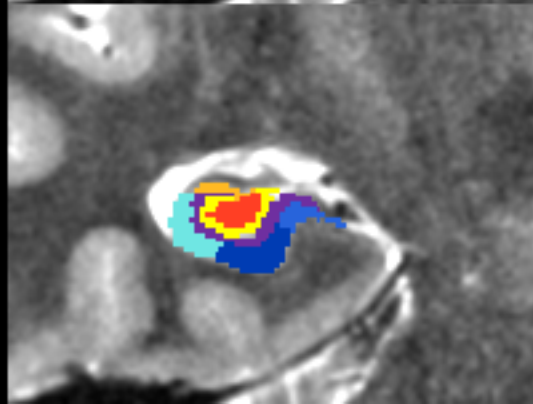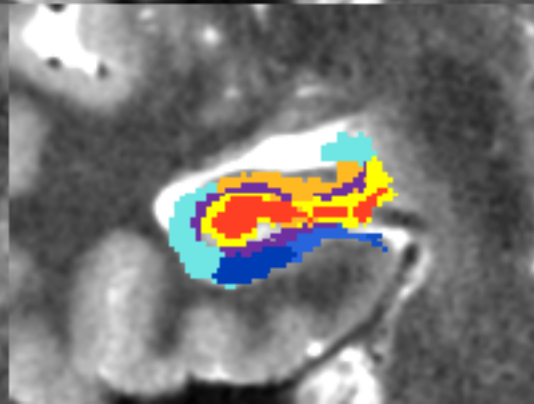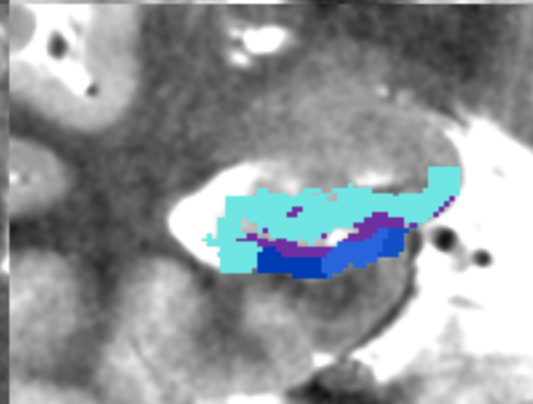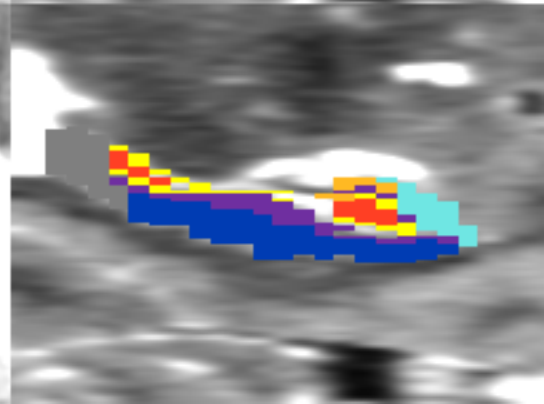

hemi=R,subject=8858710

MRI

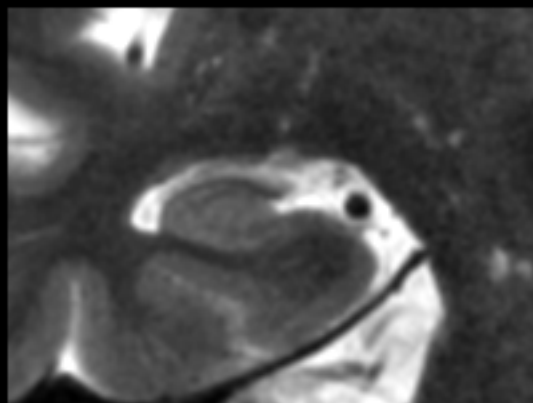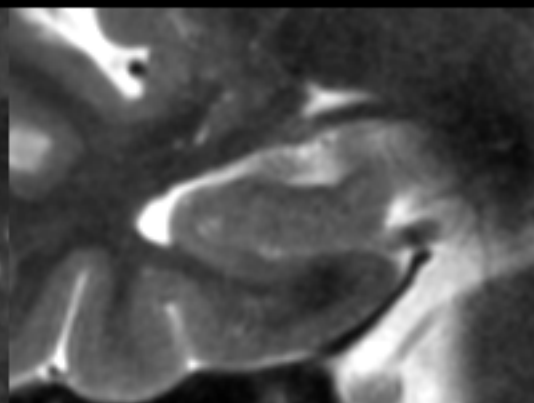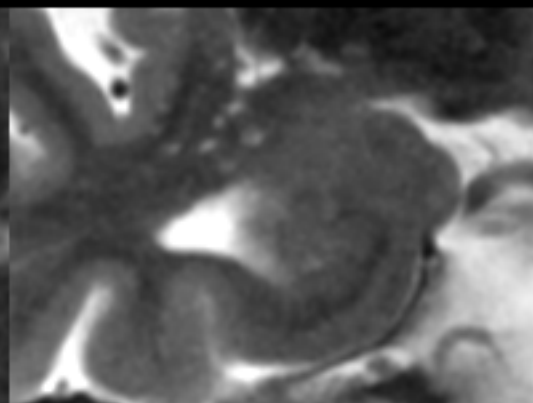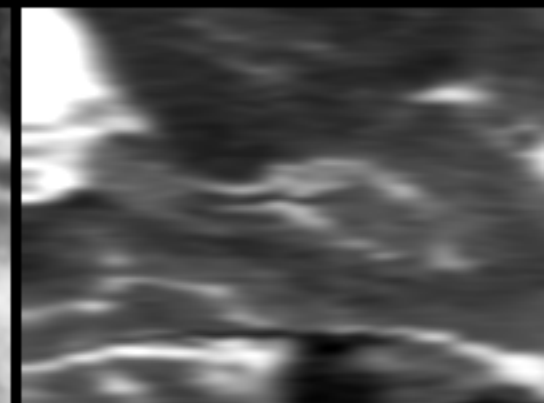

hippunfoldT1

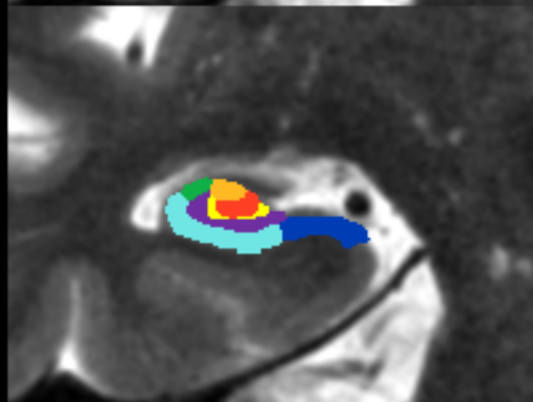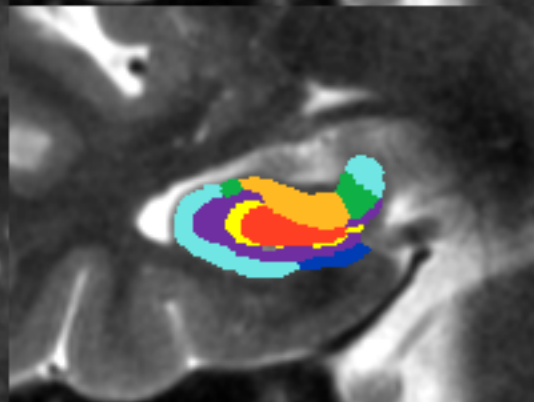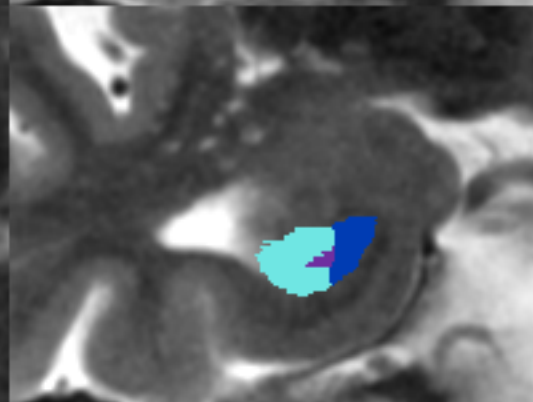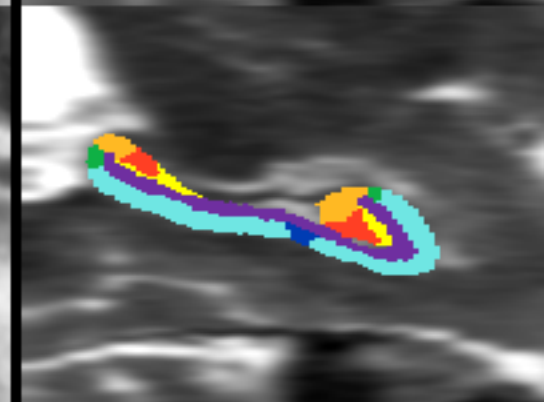

ashs

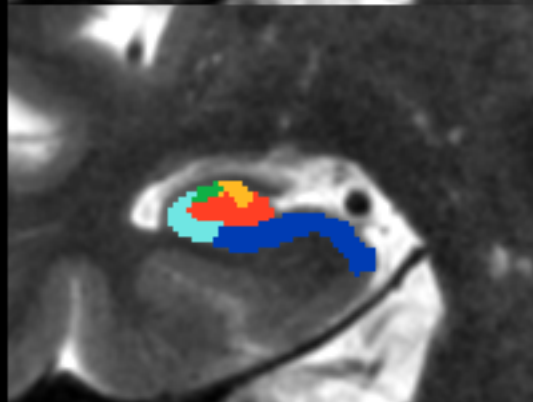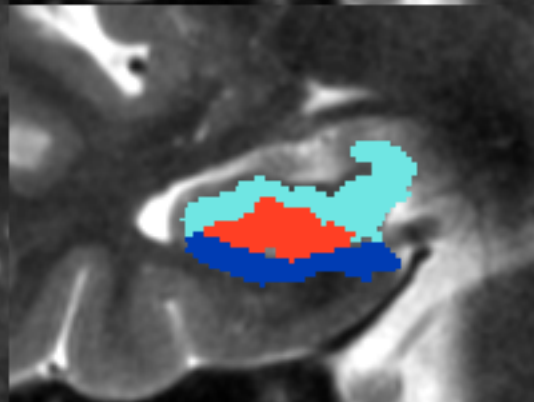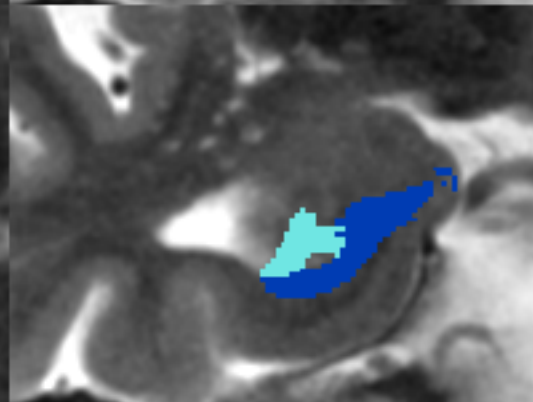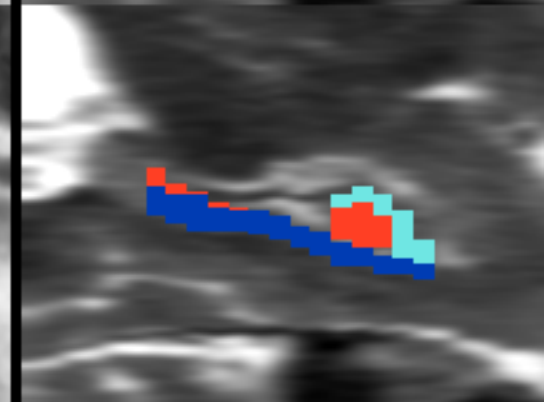

freesurfer

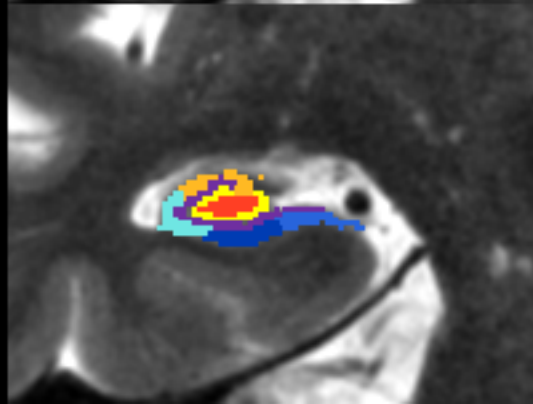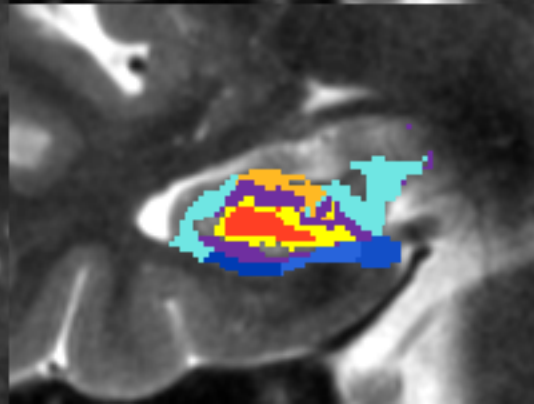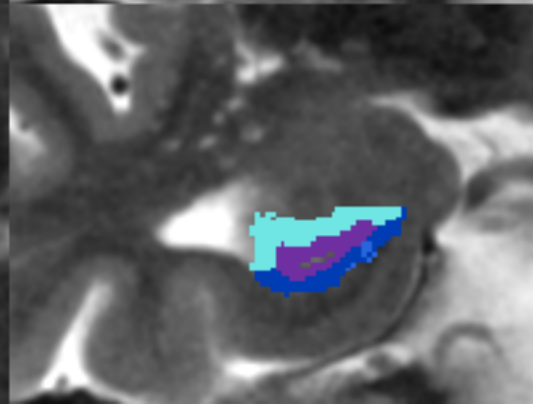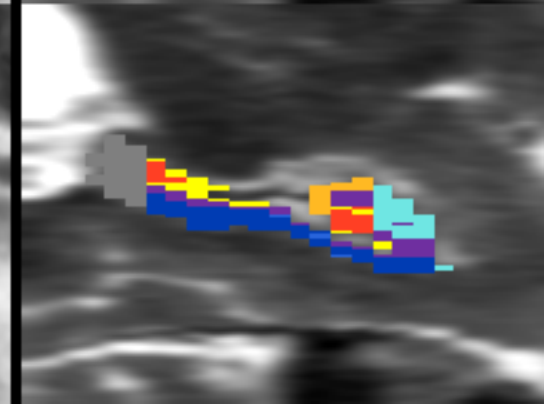

hemi=R,subject=8858912

MRI

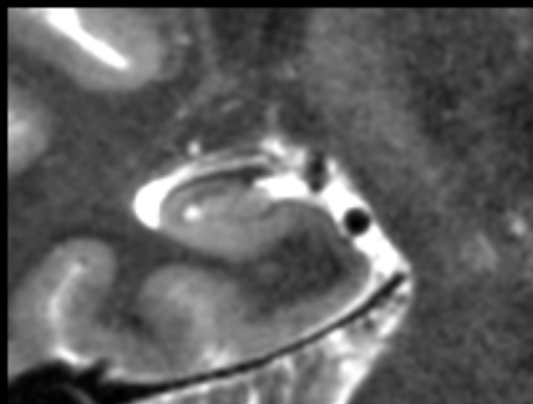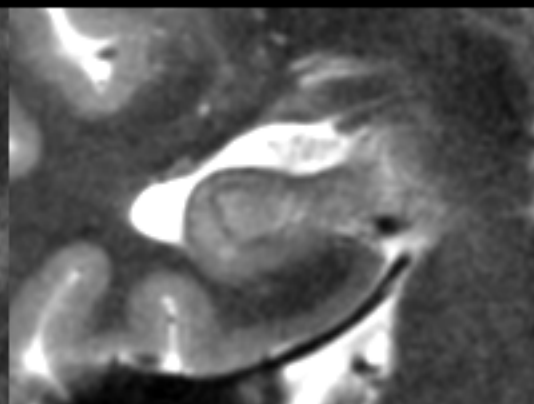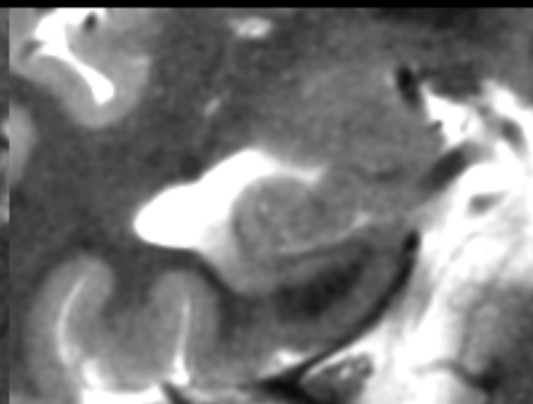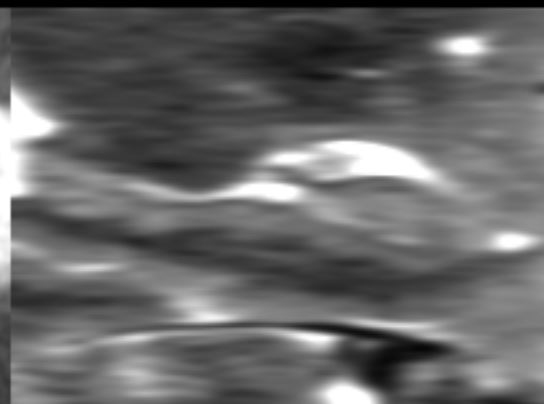

hippunfoldT1

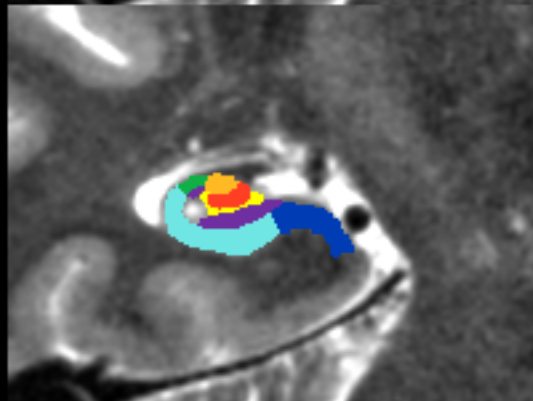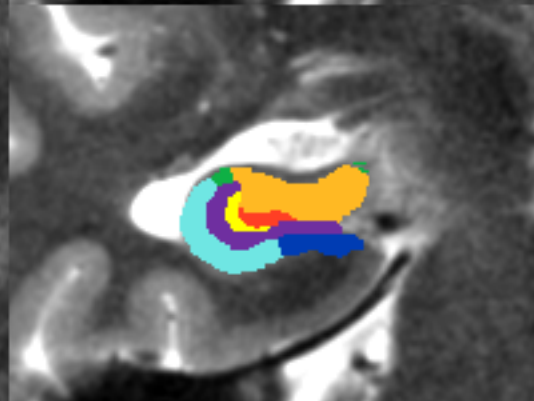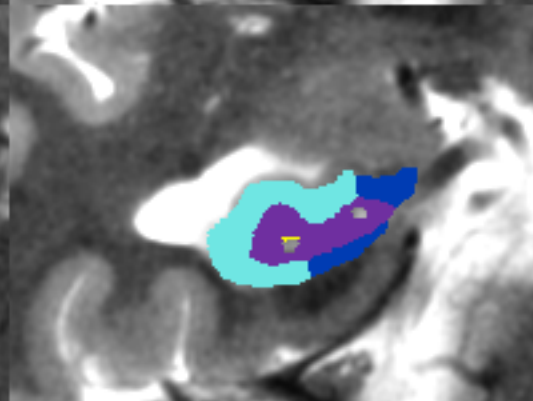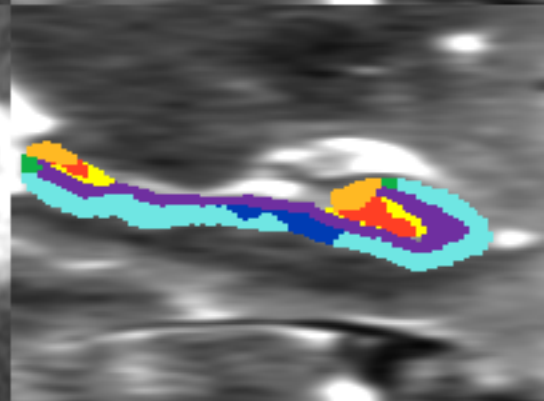

ashs

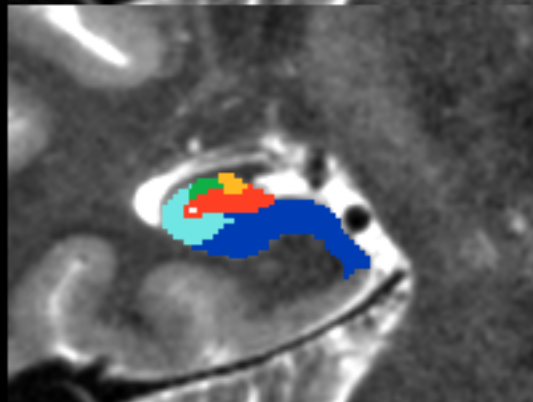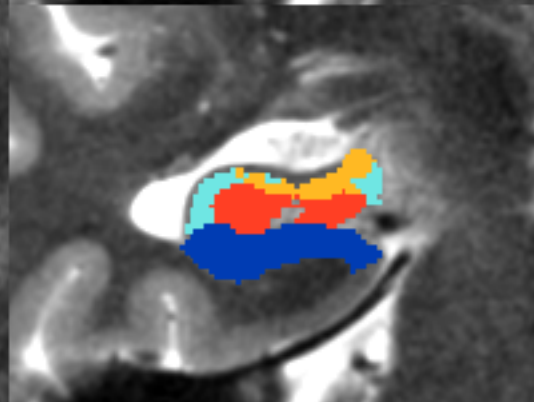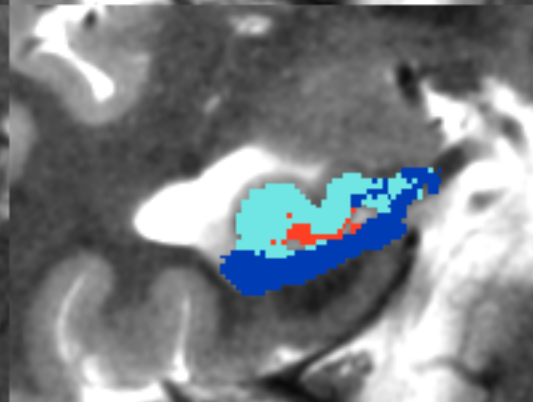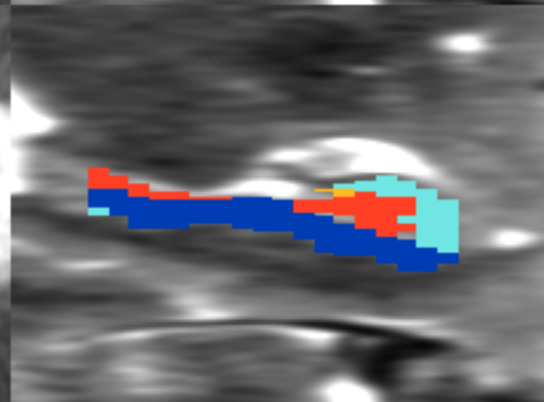

freesurfer

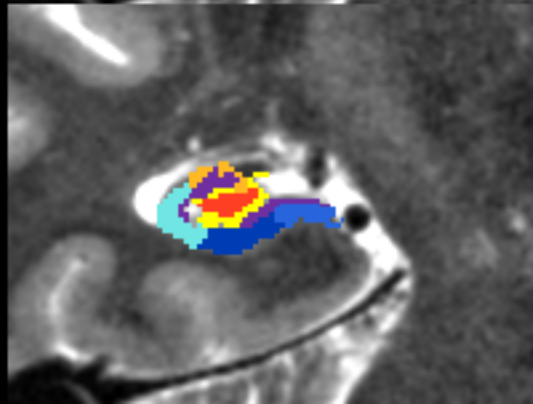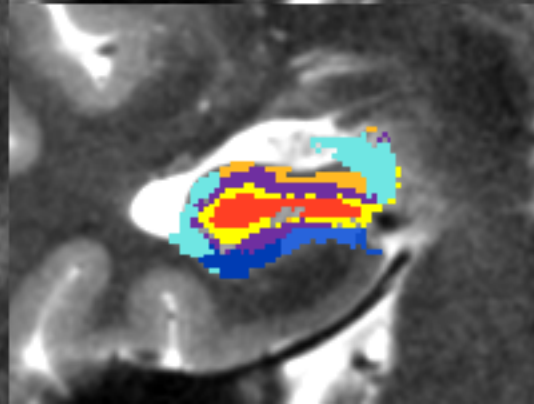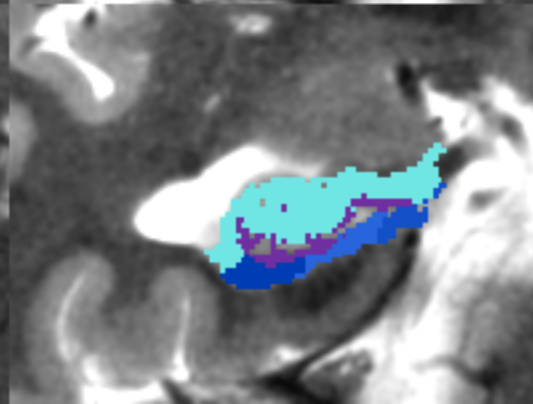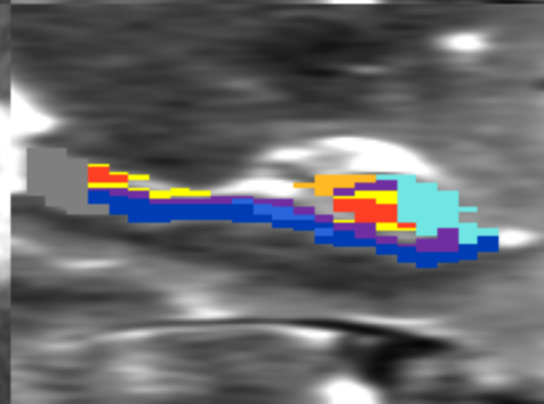

hemi=R,subject=8867610

MRI

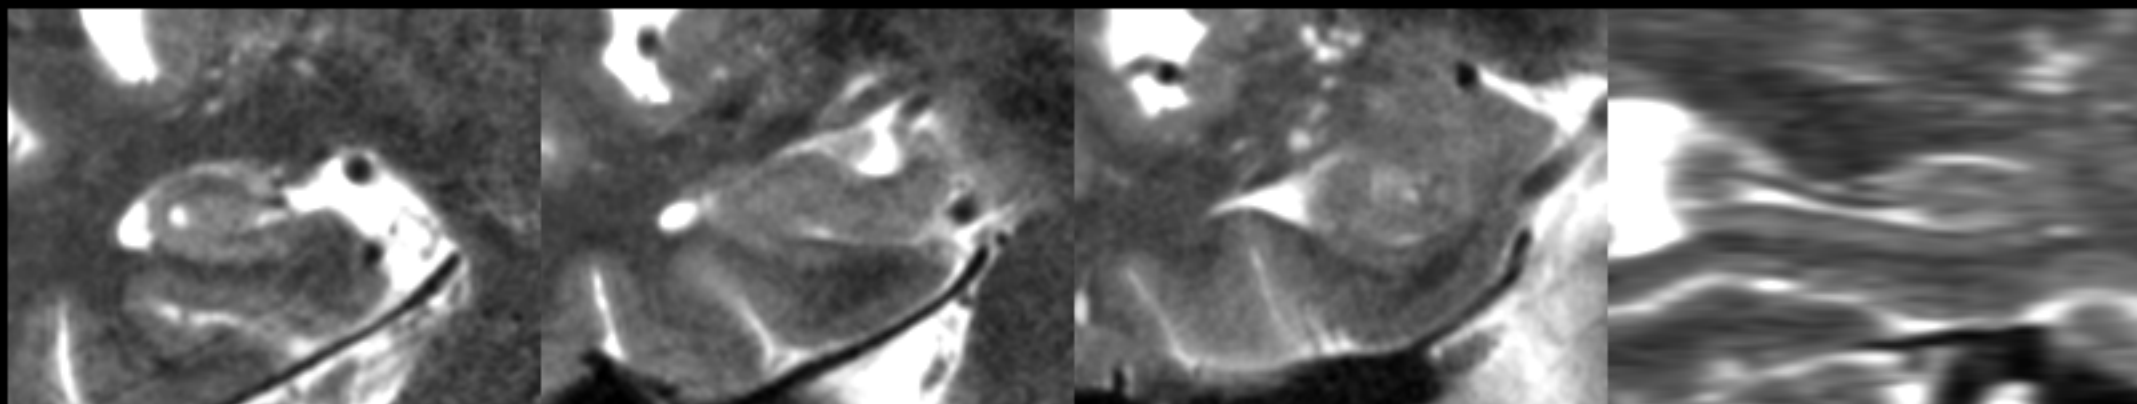

hippunfoldT1

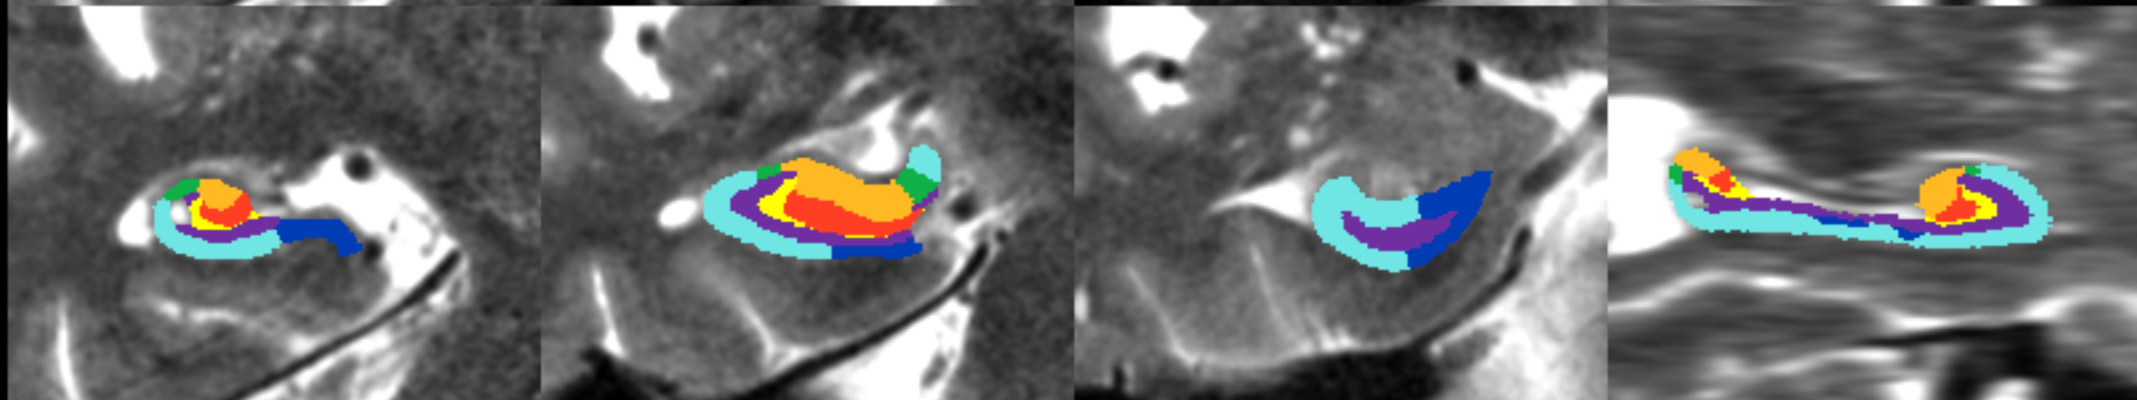

ashs

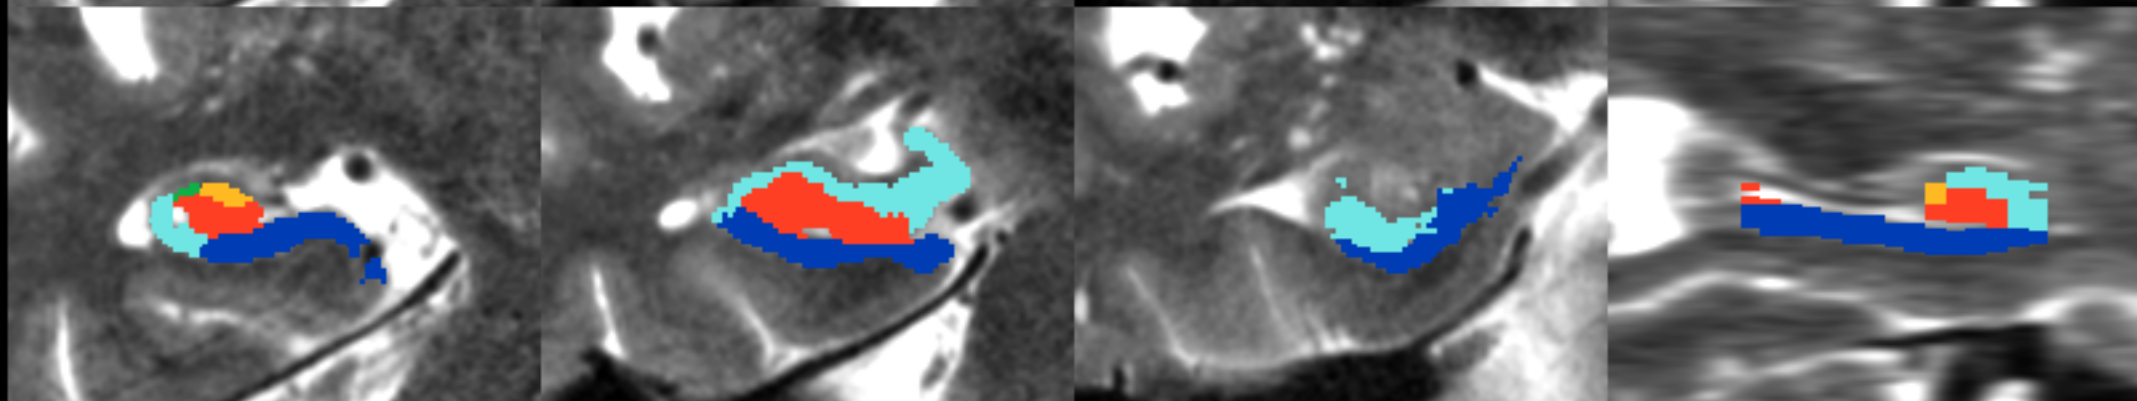

freesurfer

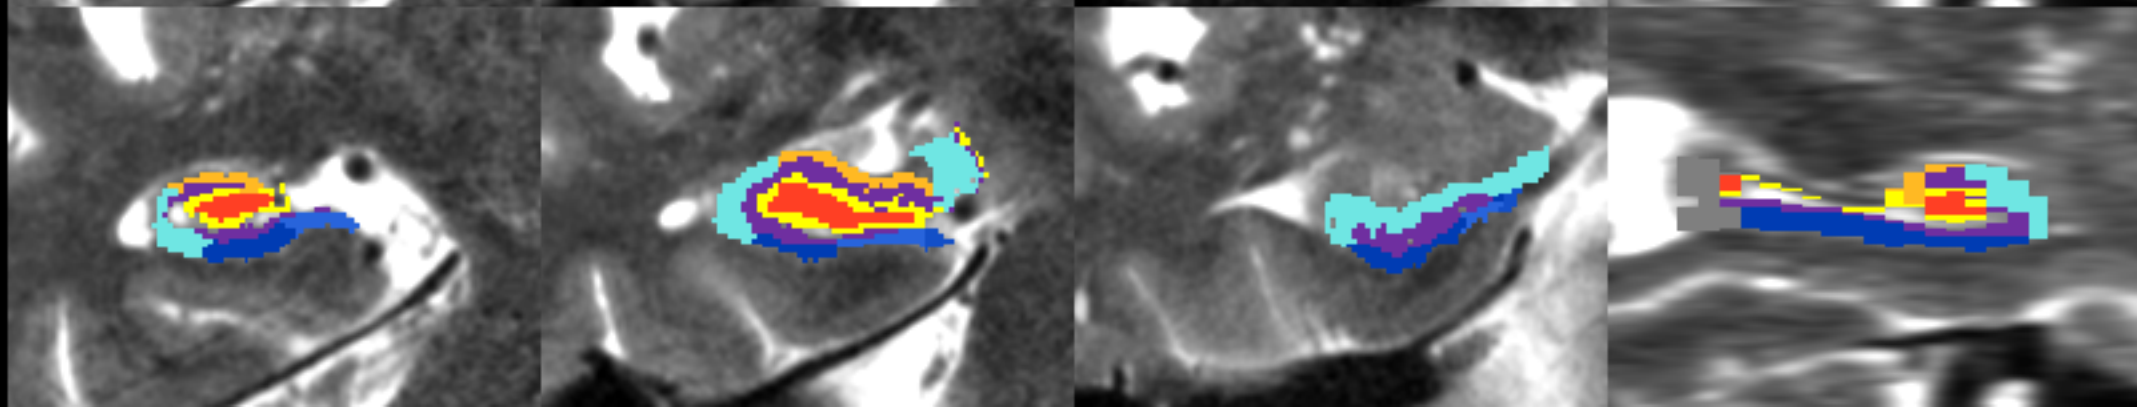

hemi=R,subject=8913388

MRI

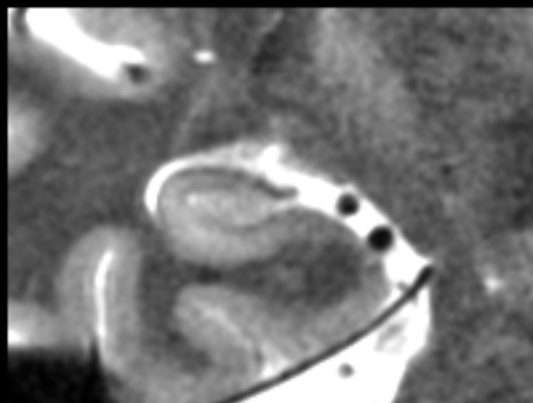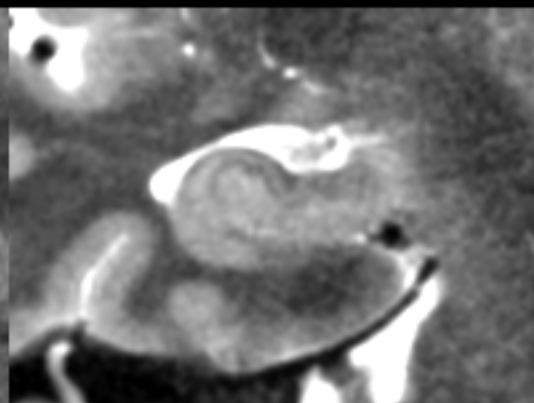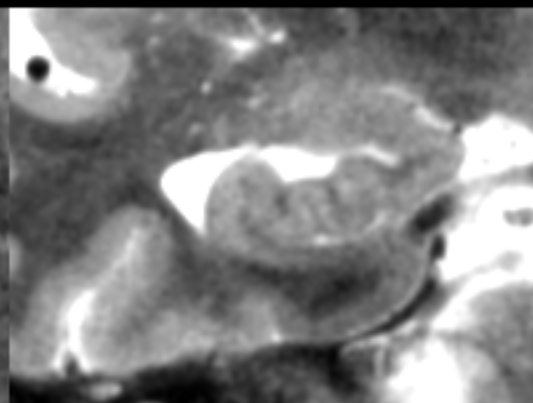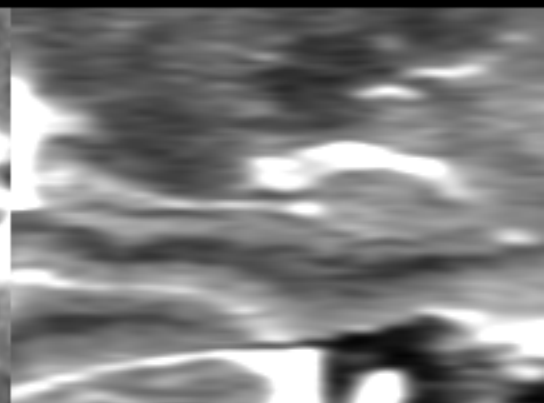

hippunfoldT1

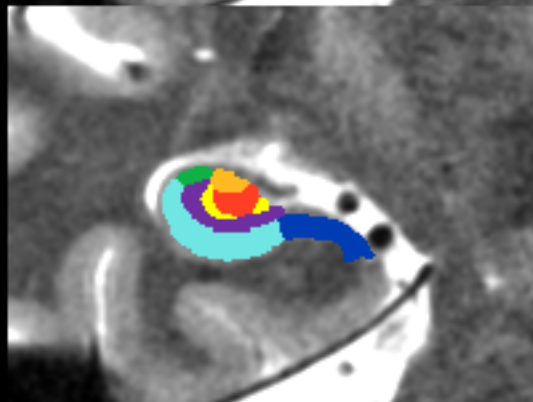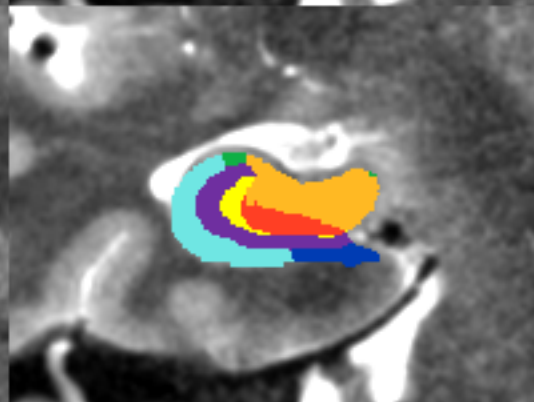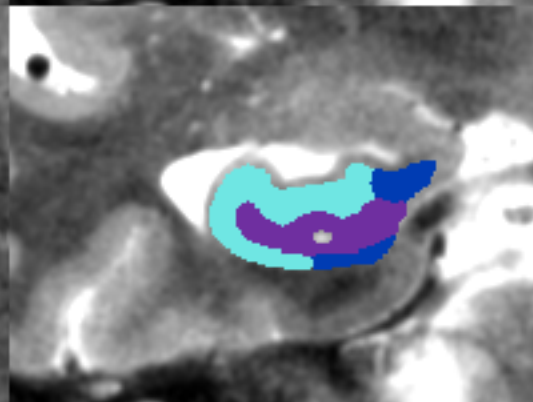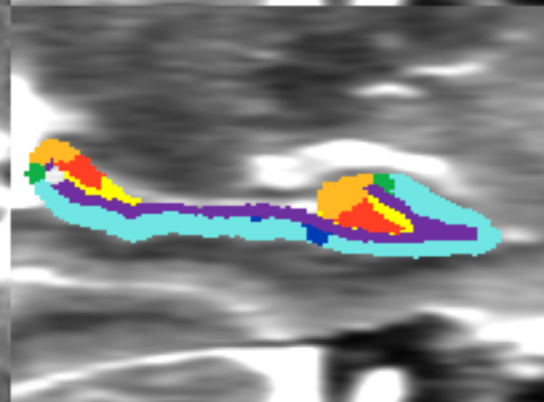

ashs

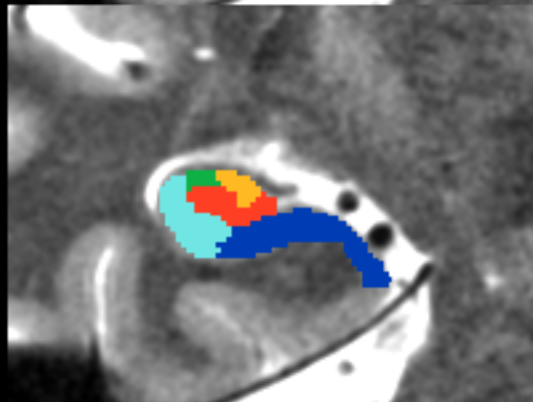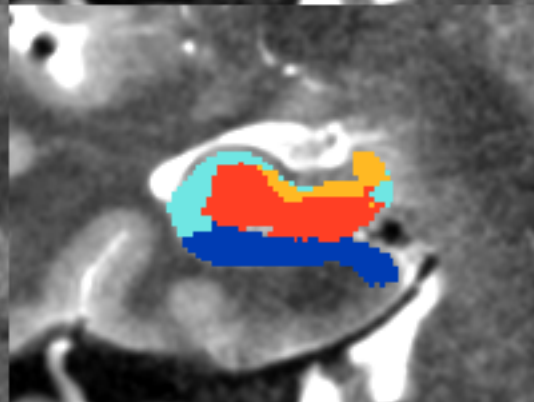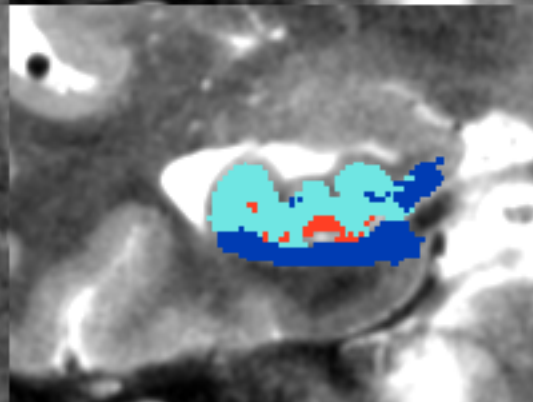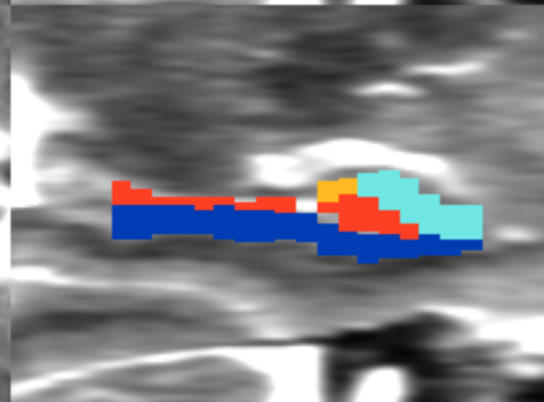

freesurfer

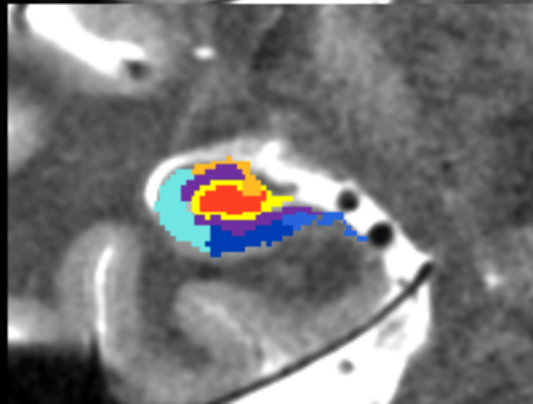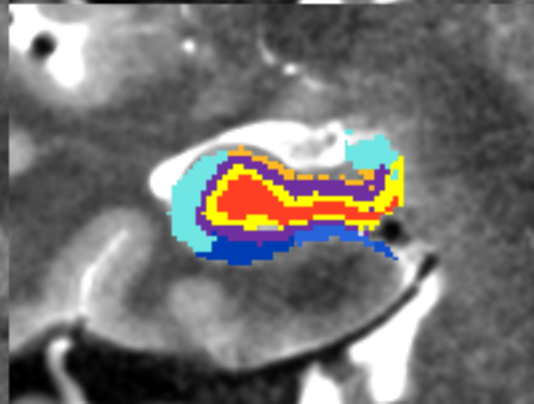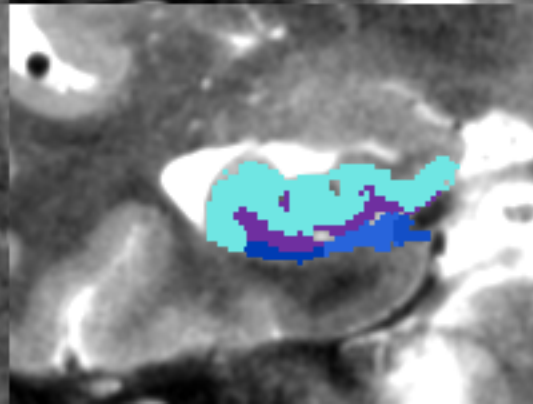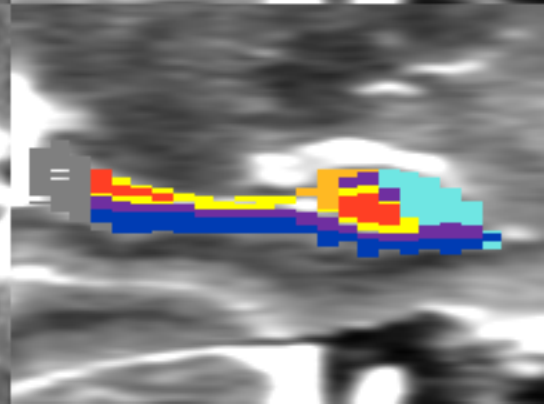

hemi=R,subject=8959211

MRI

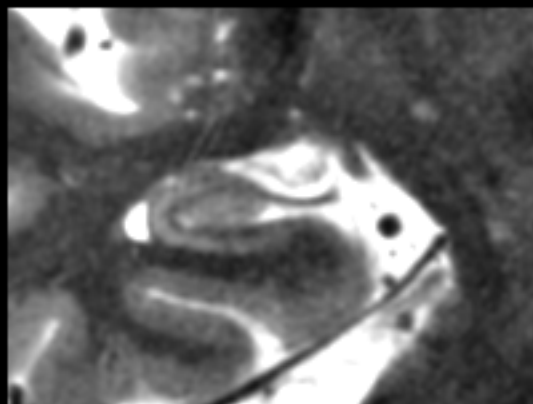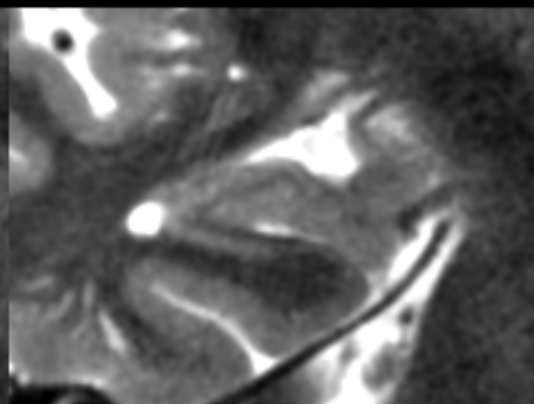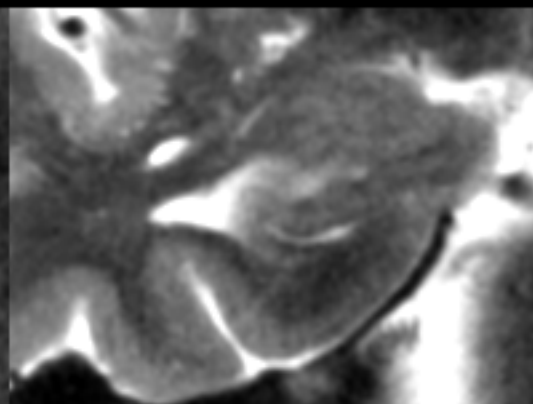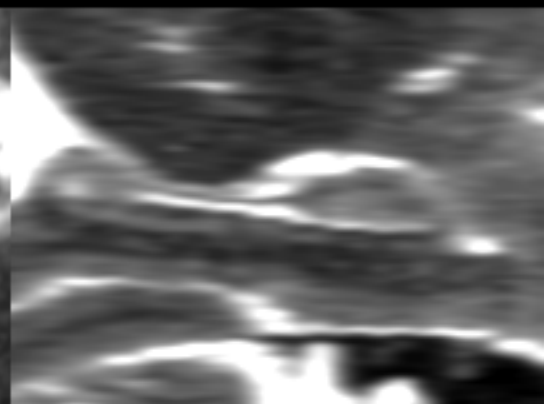

hippunfoldT1

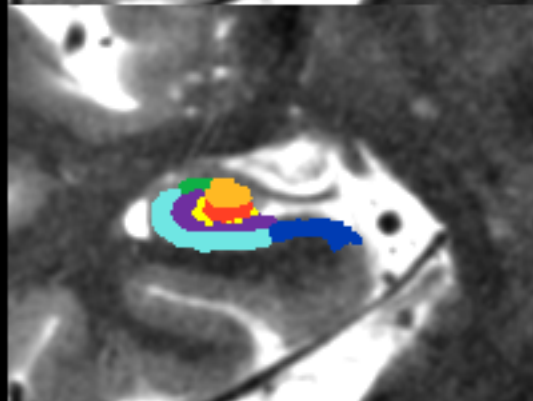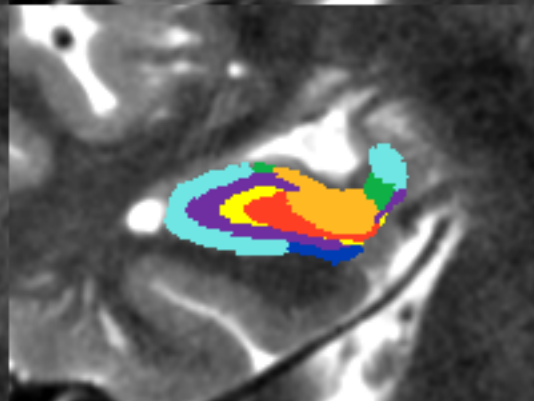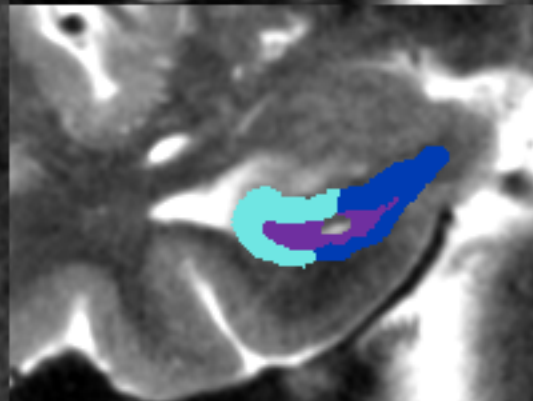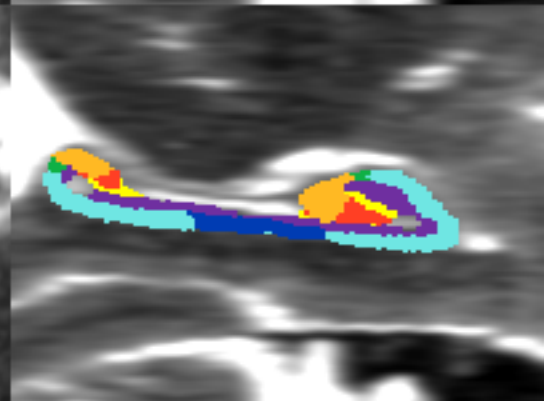

ashs

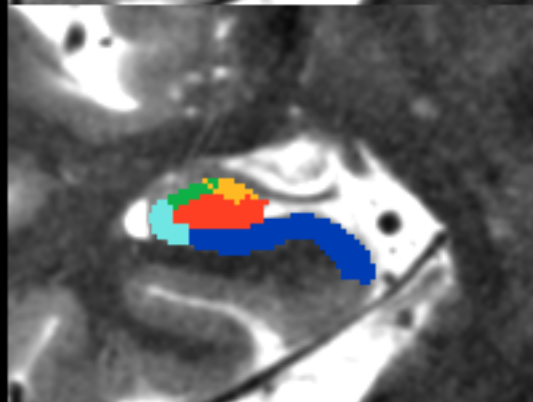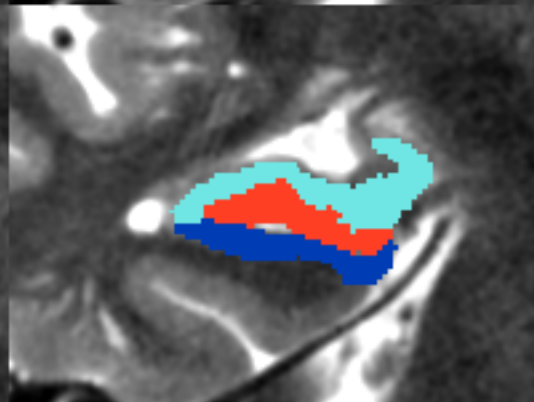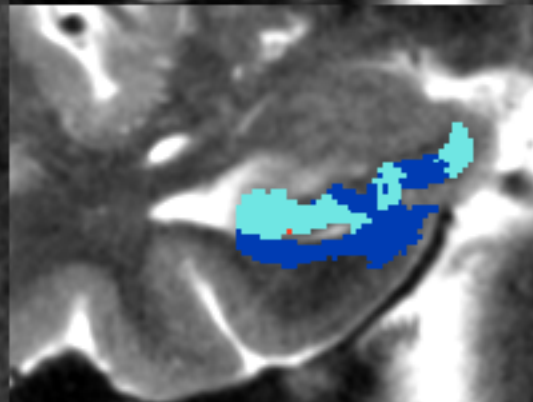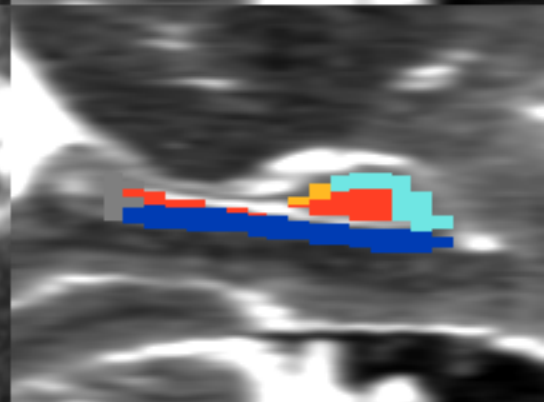

freesurfer

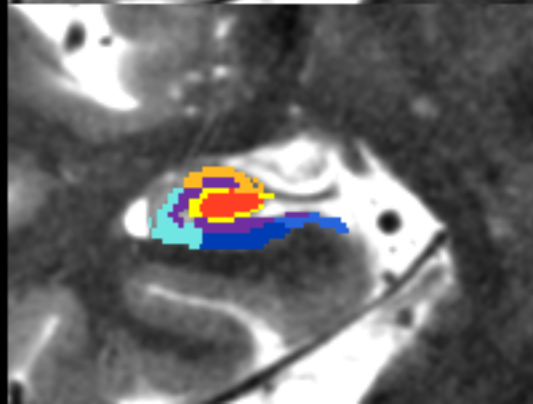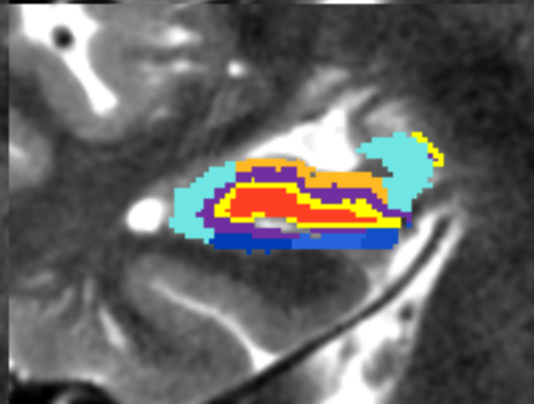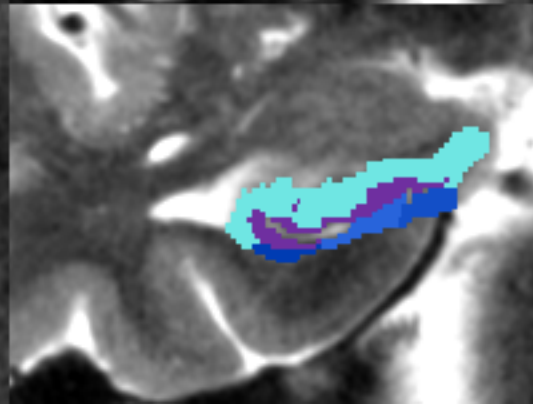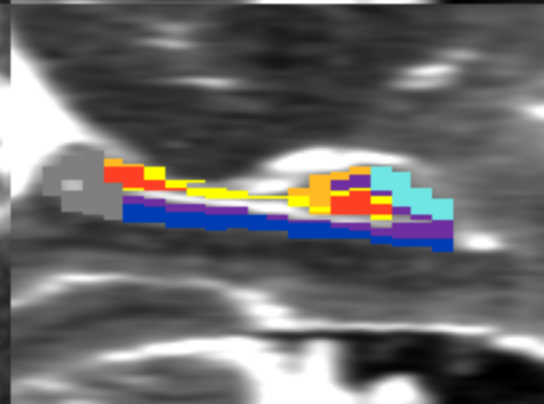



hemi=R,subject=9086990

MRI

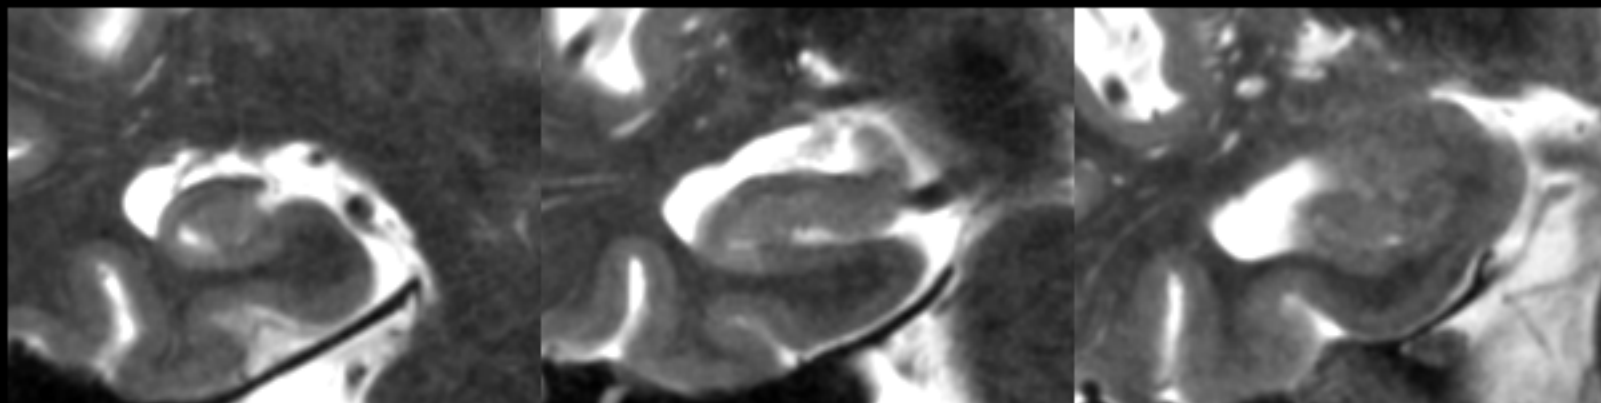

hippunfoldT1

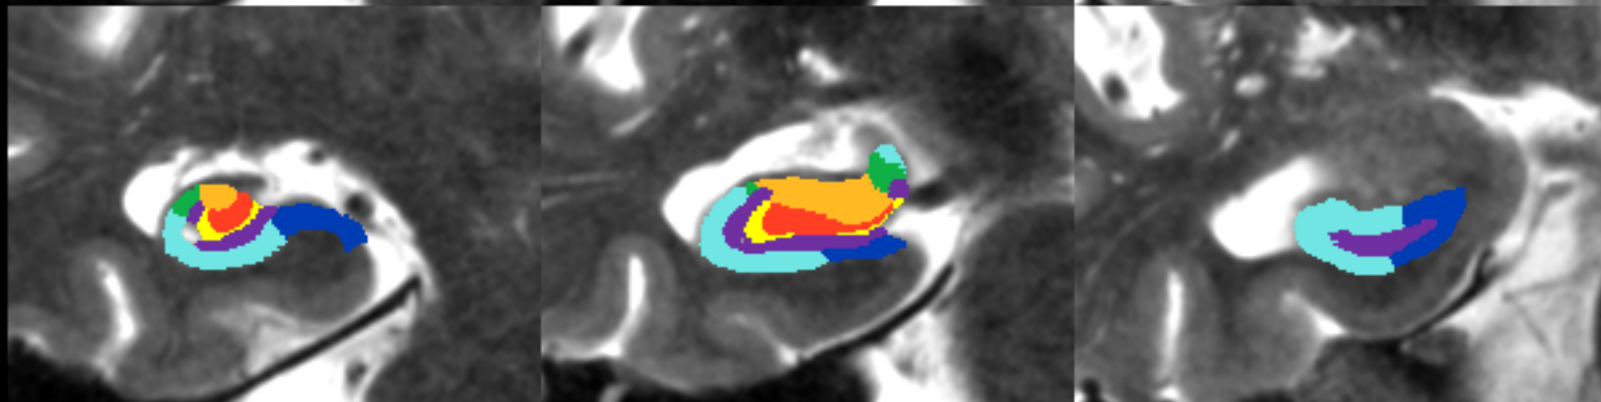

ashs

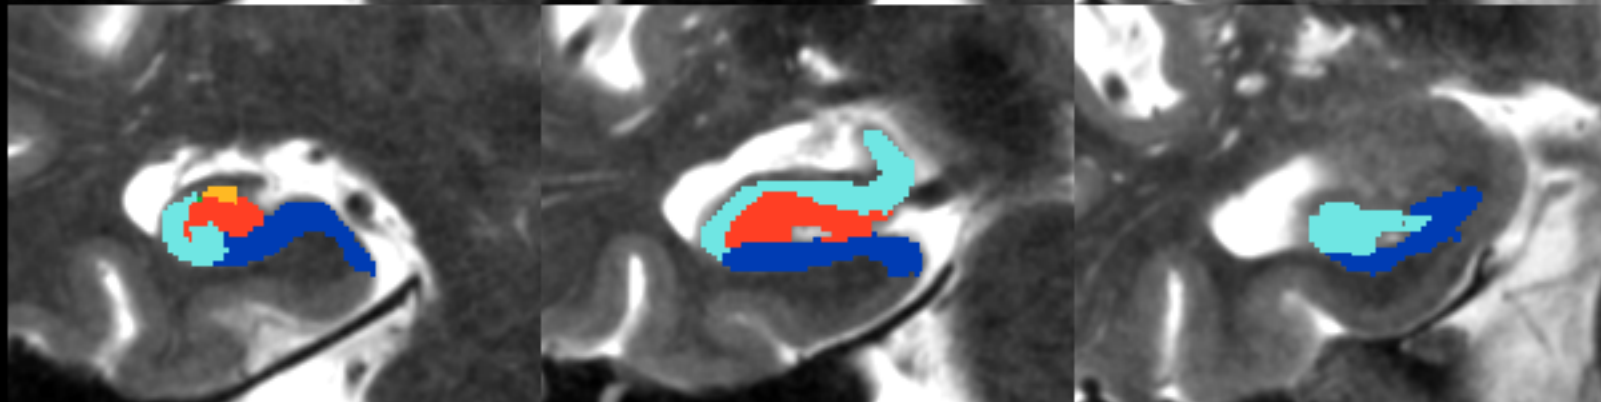

freesurfer

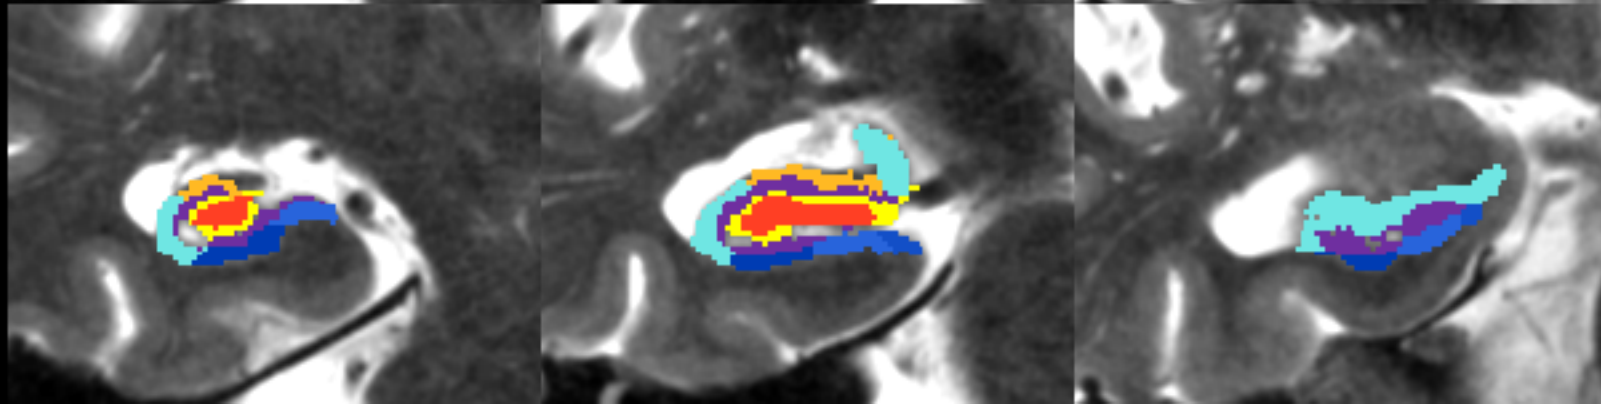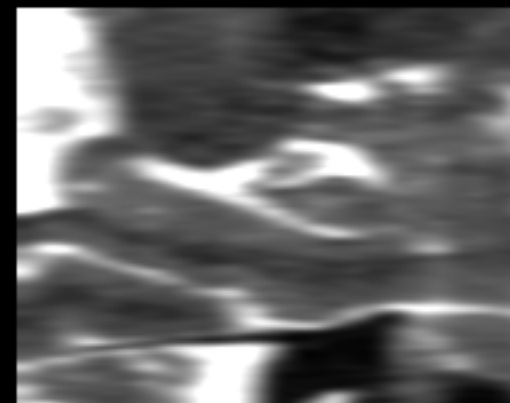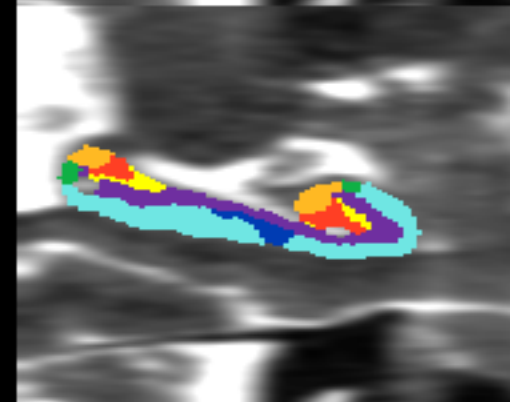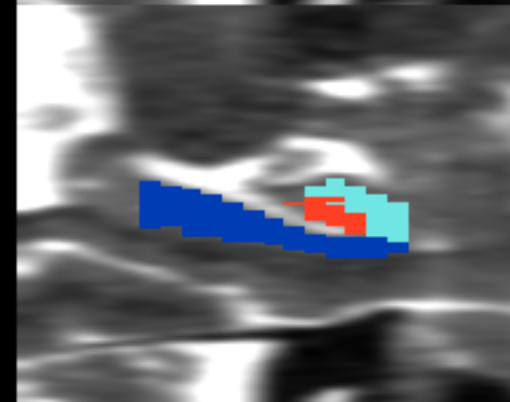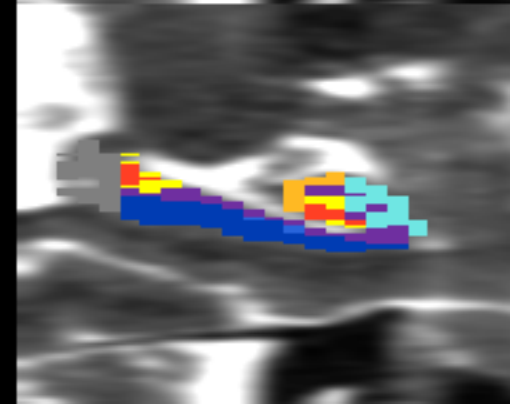

hemi=R,subject=9096690

MRI

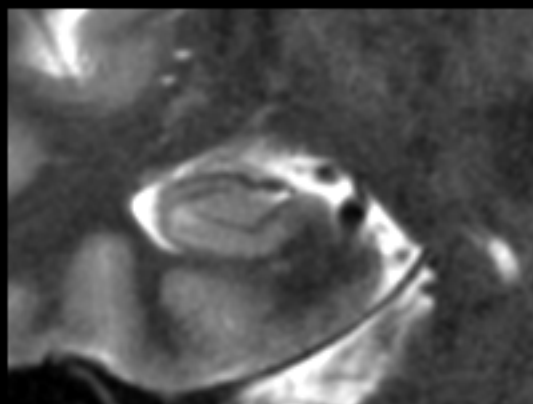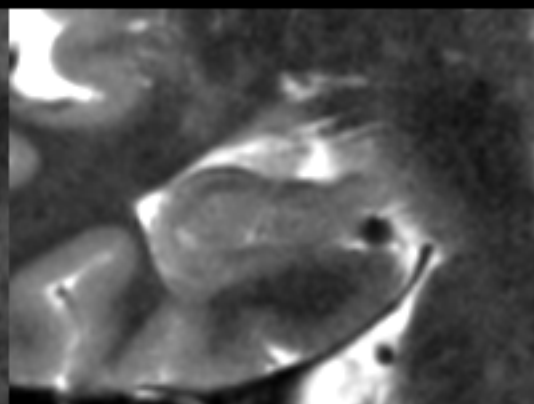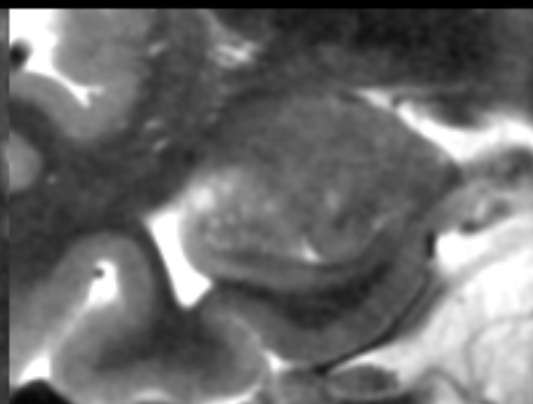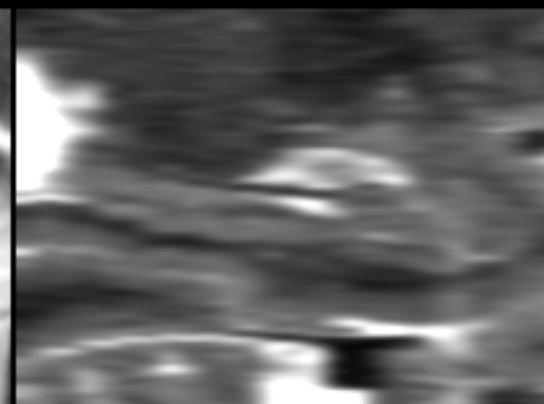

hippunfoldT1

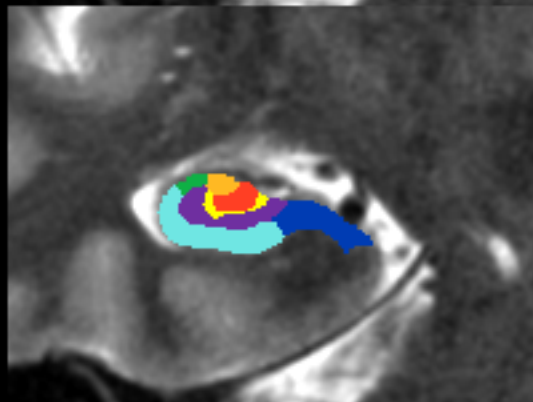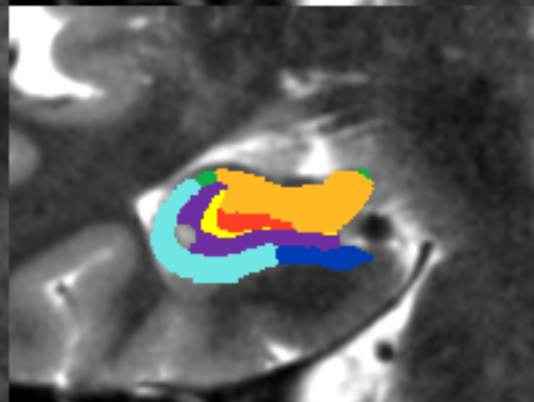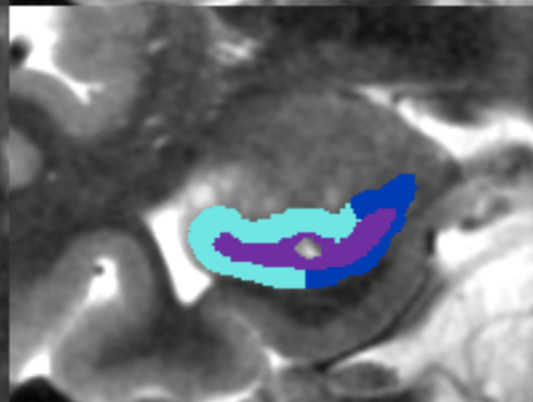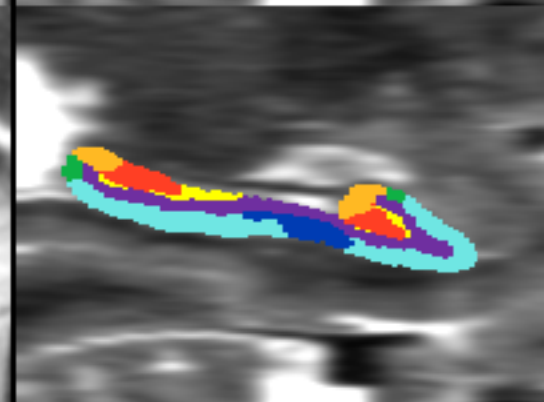

ashs

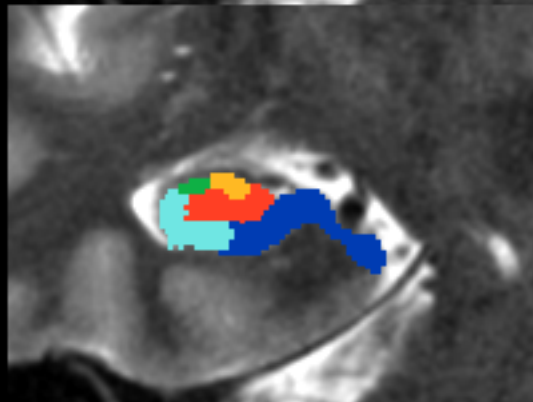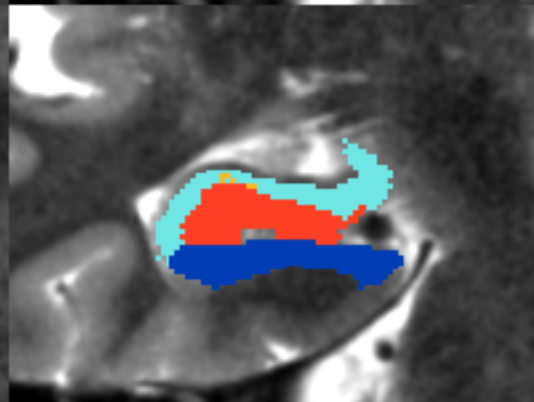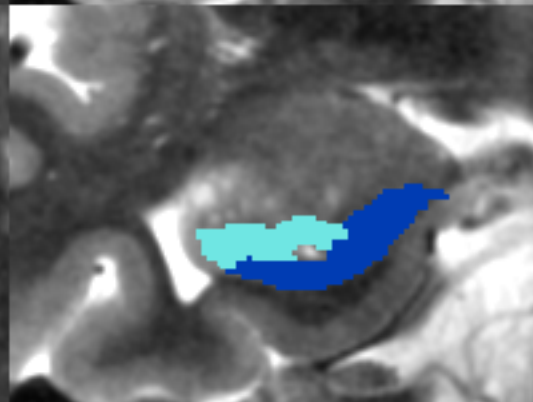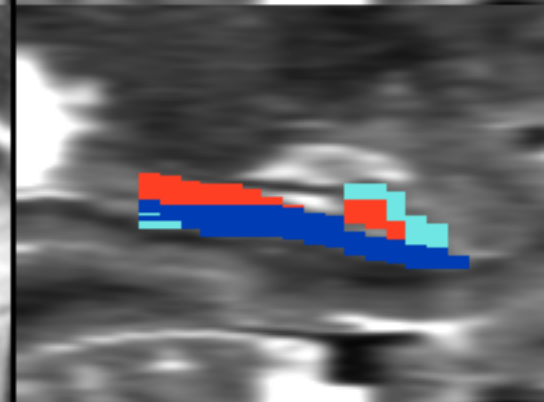

freesurfer

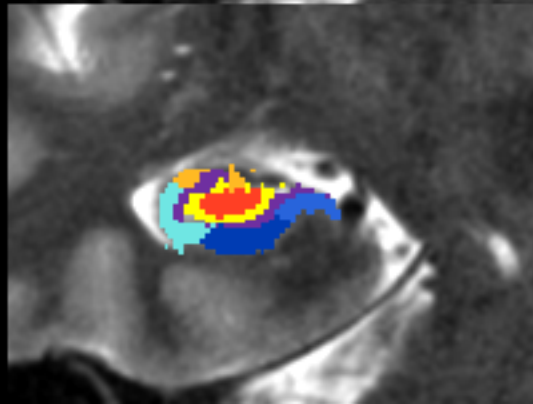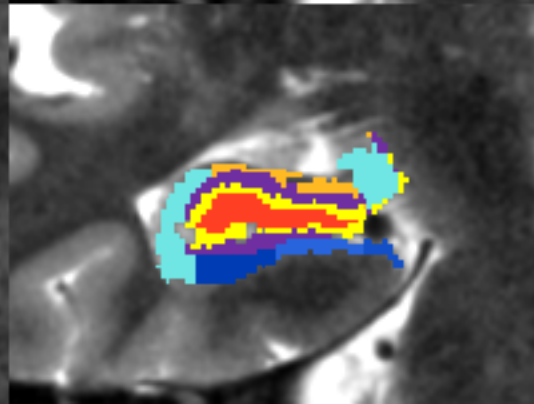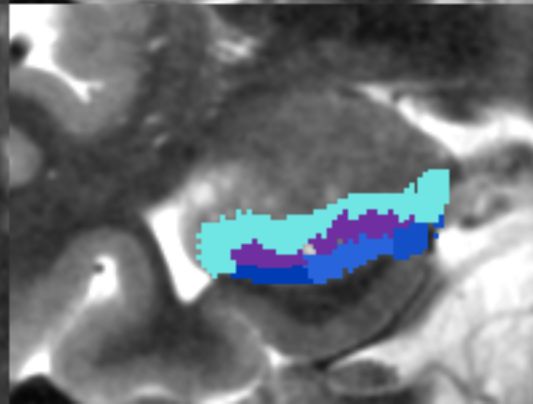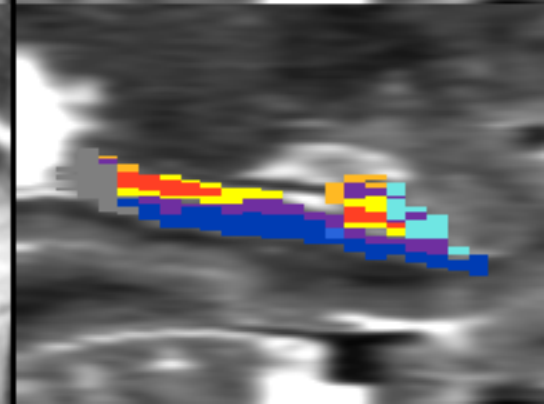

hemi=R,subject=9157179

MRI

hippunfoldT1

ashs

freesurfer

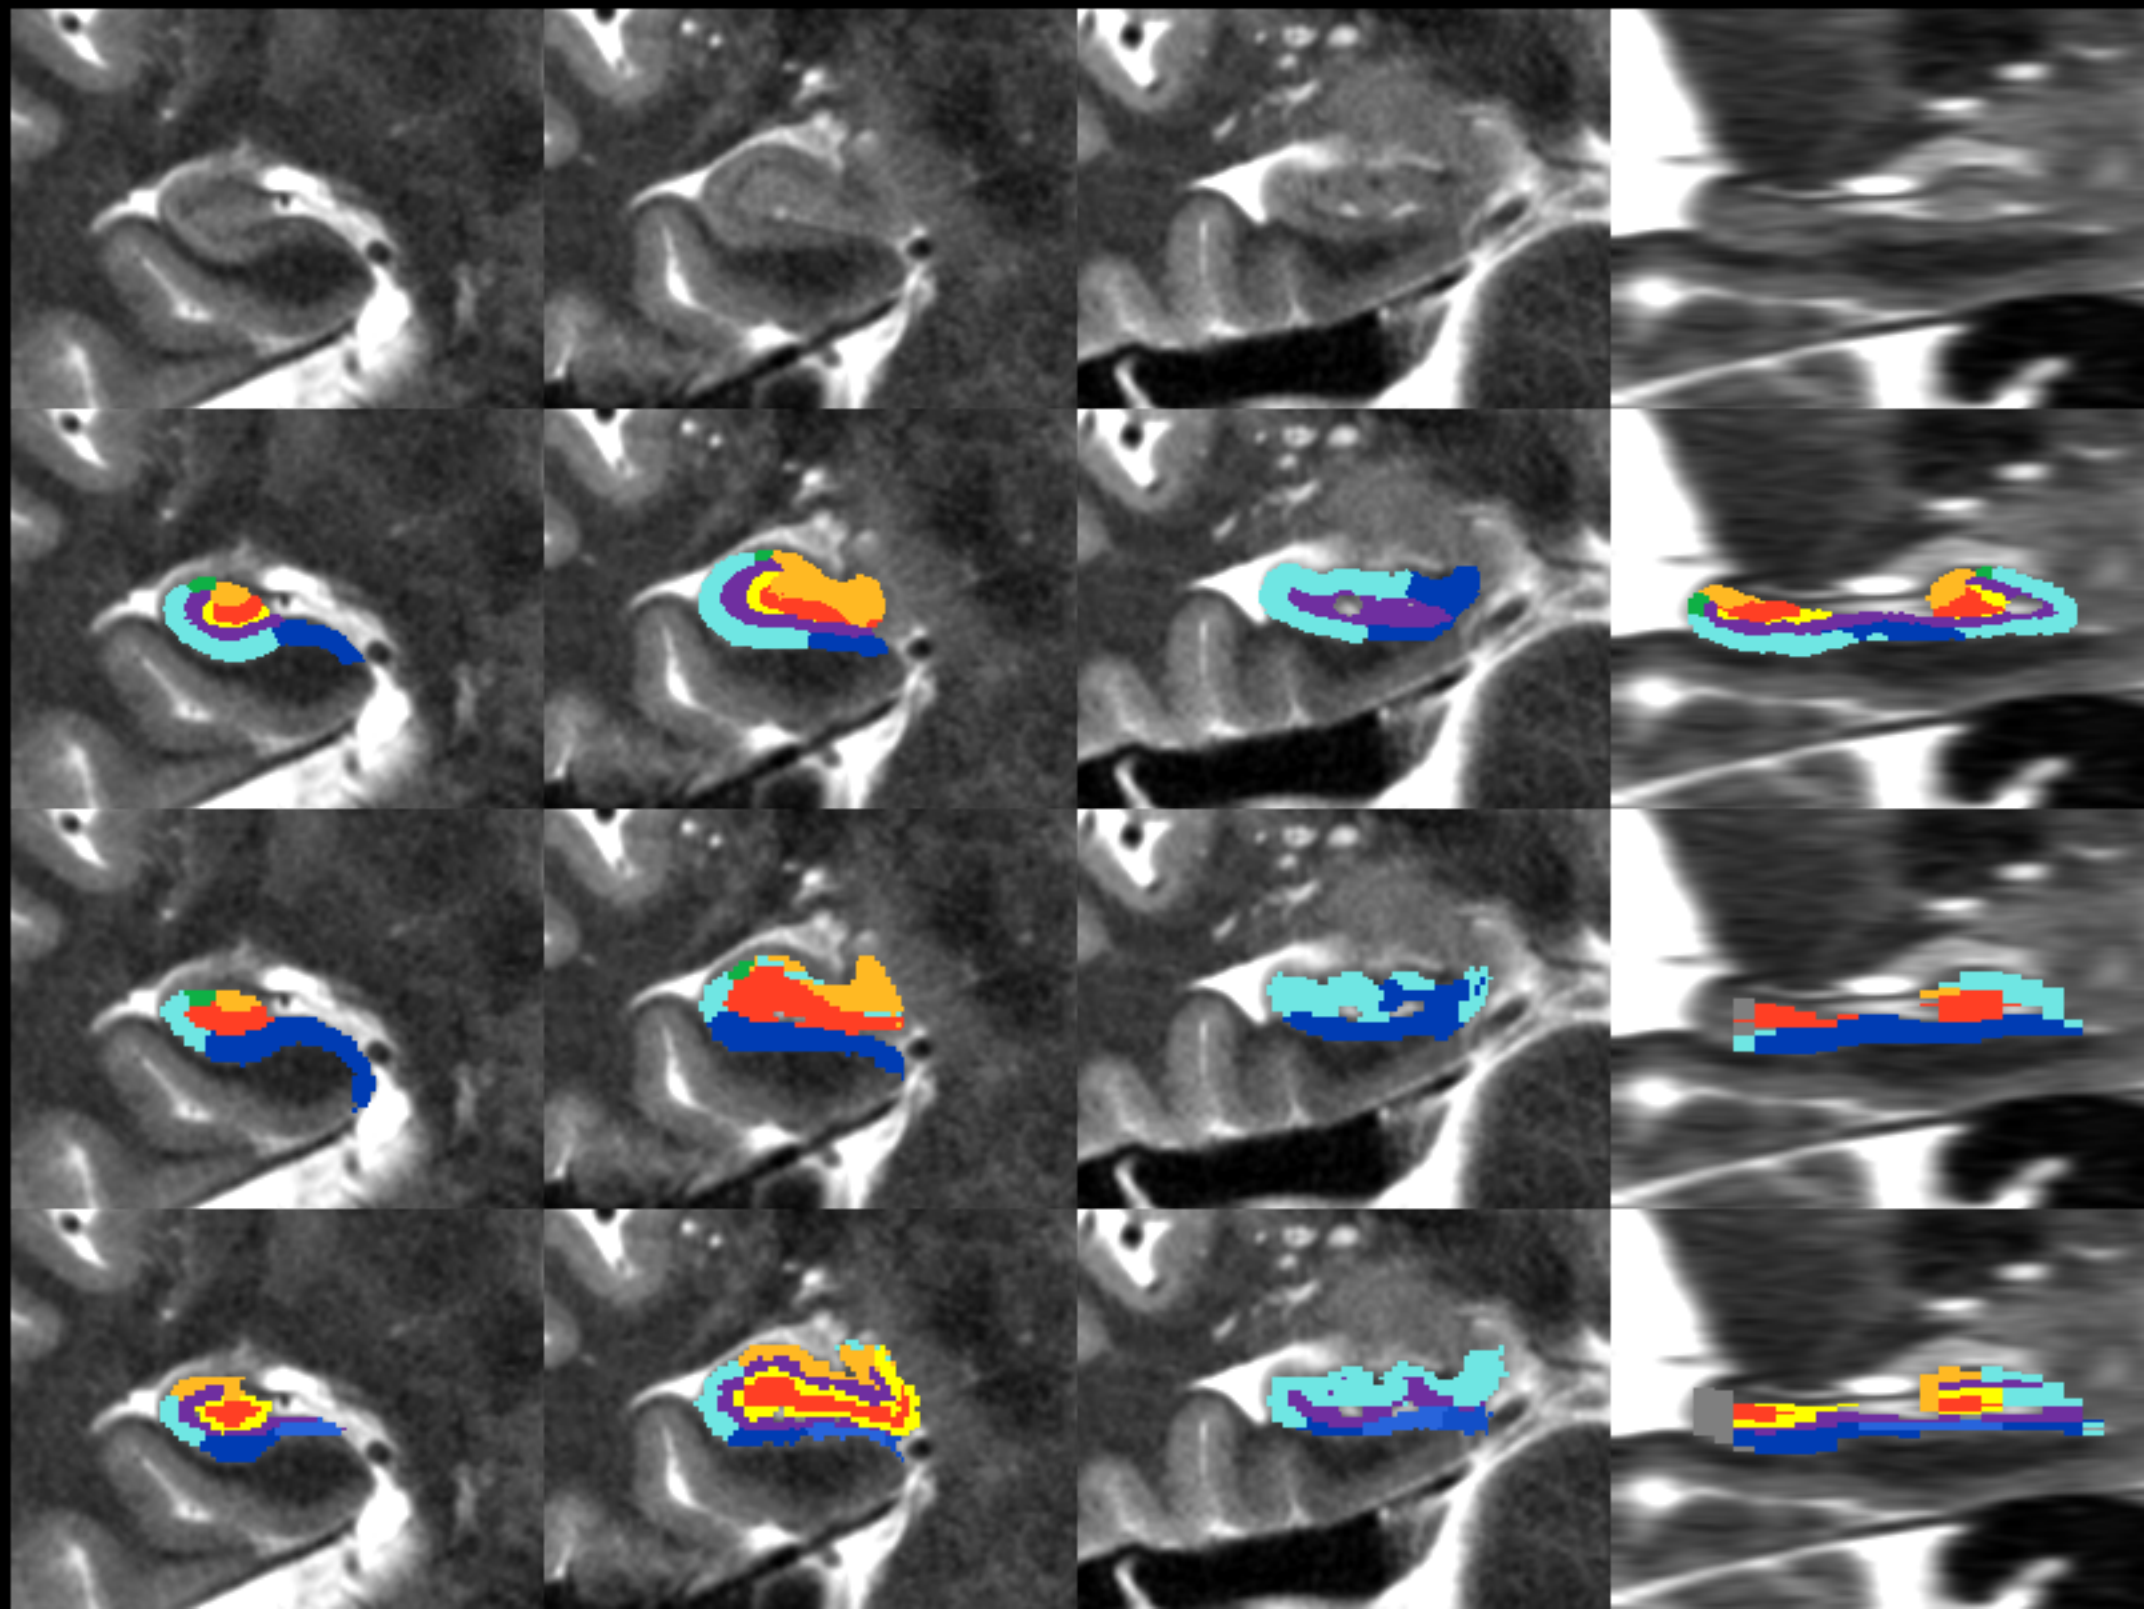

hemi=R,subject=9198294

MRI

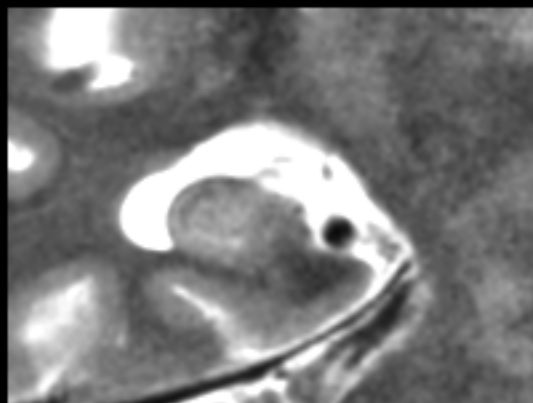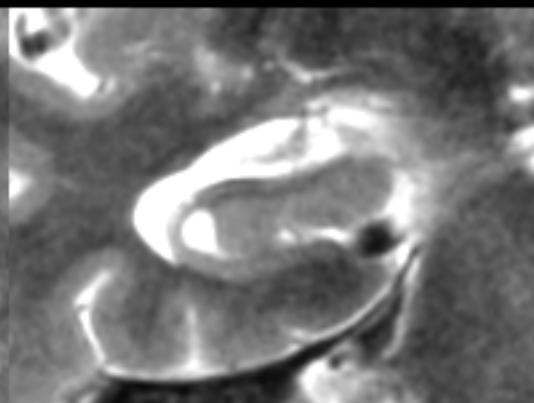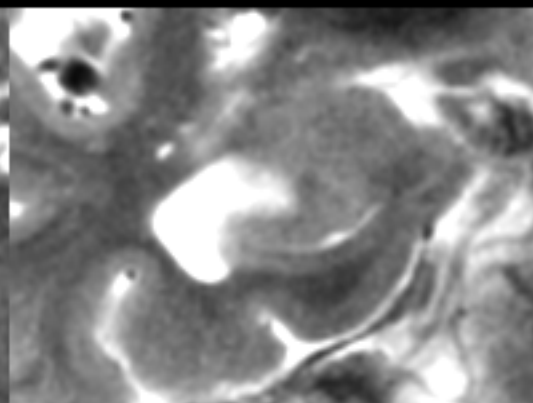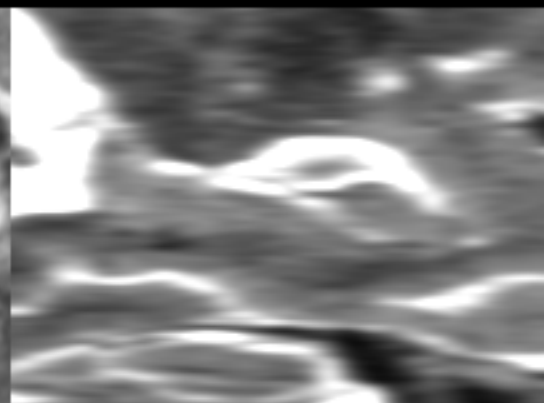

hippunfoldT1

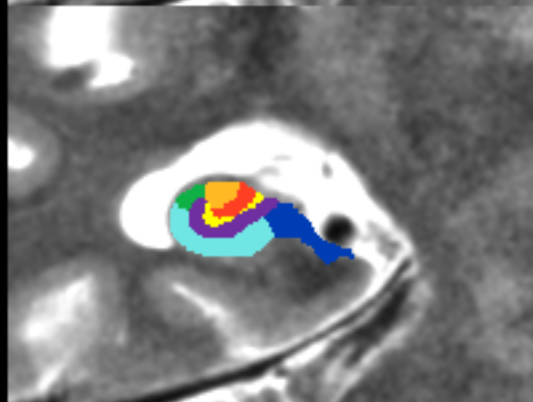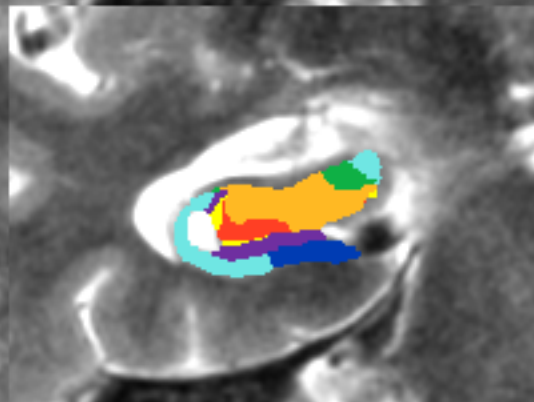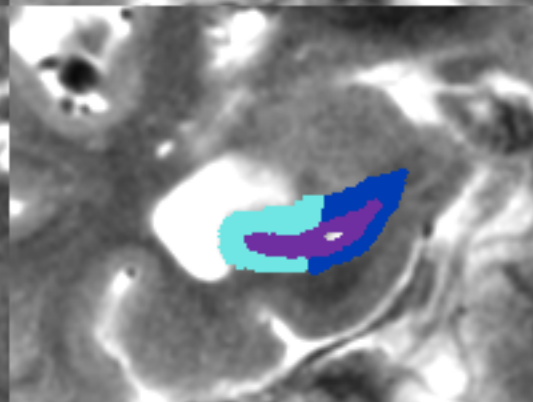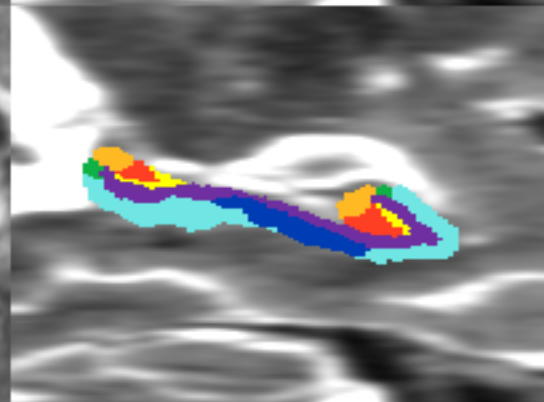

ashs

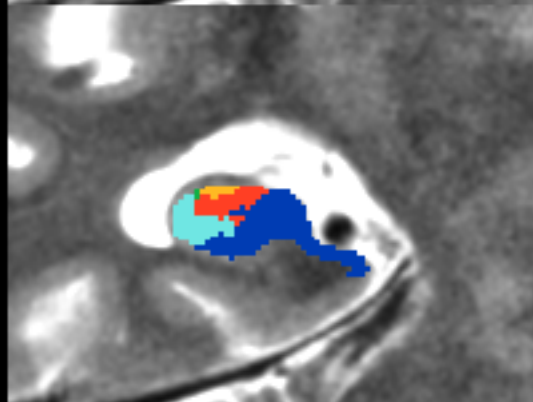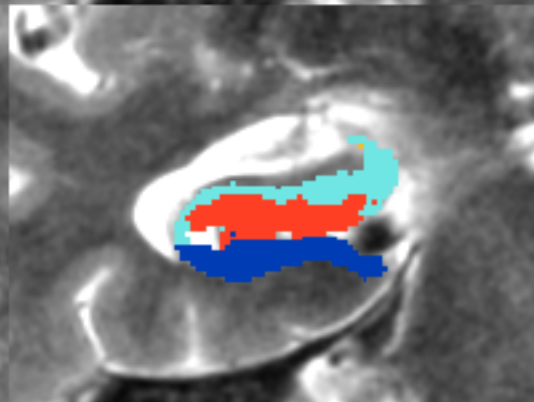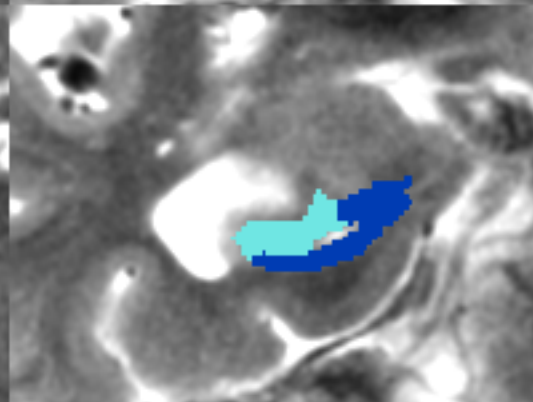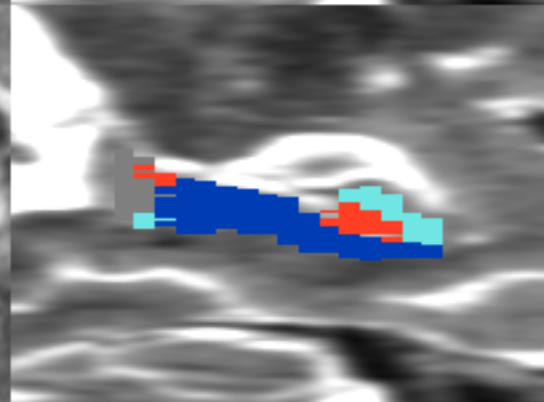

freesurfer

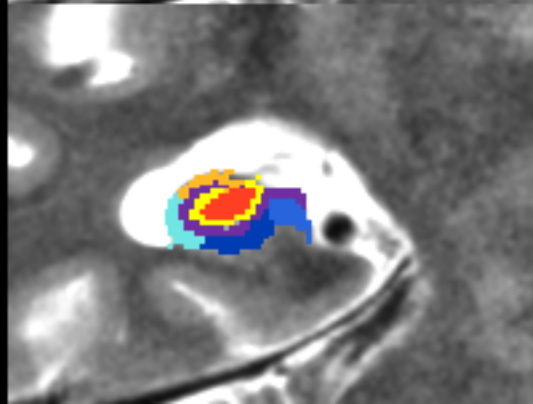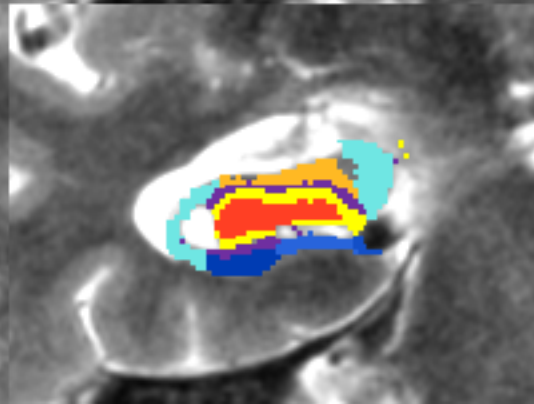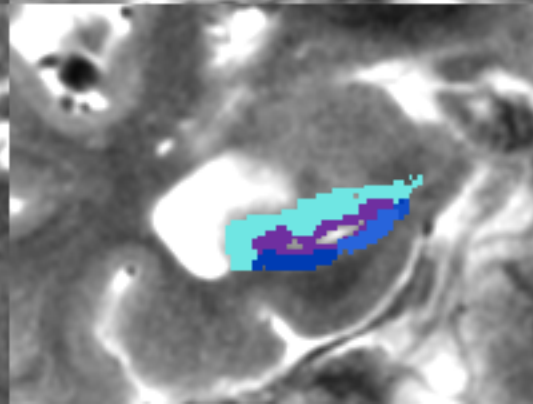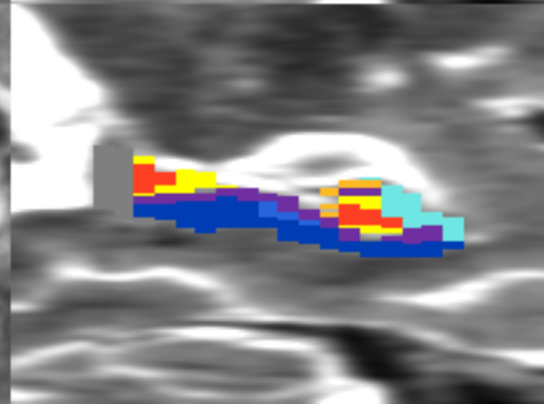

hemi=R,subject=9329687

MRI

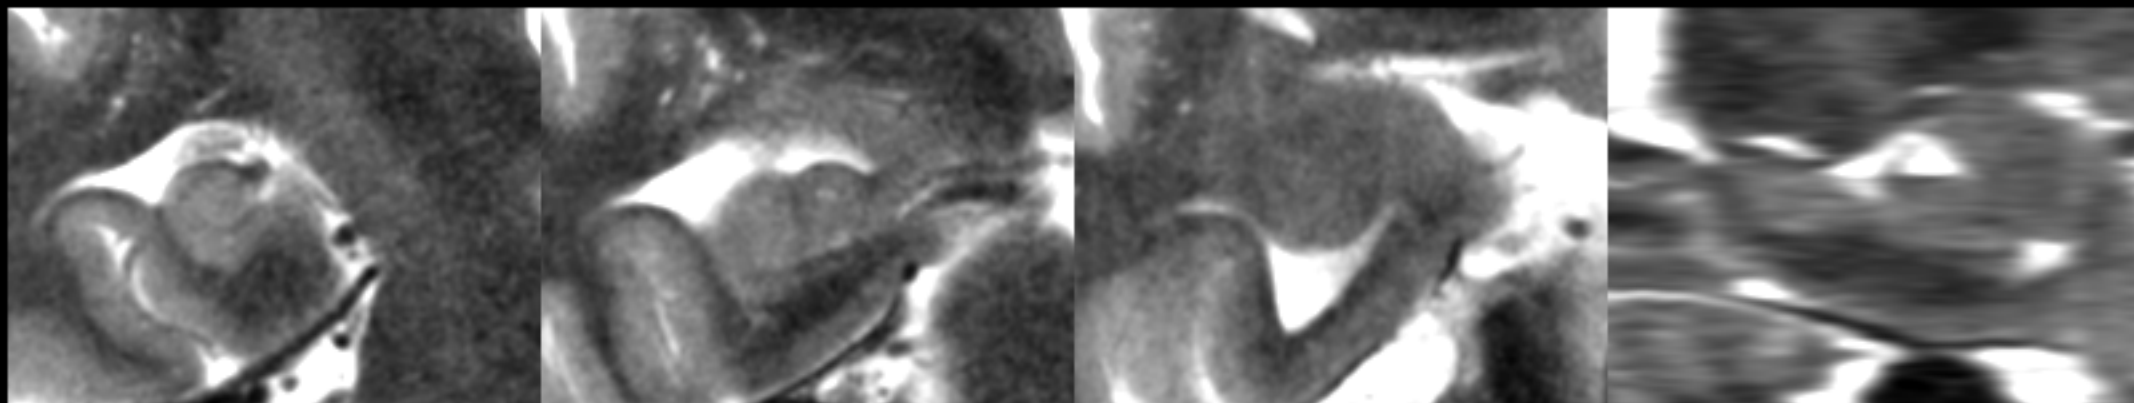

hippunfoldT1

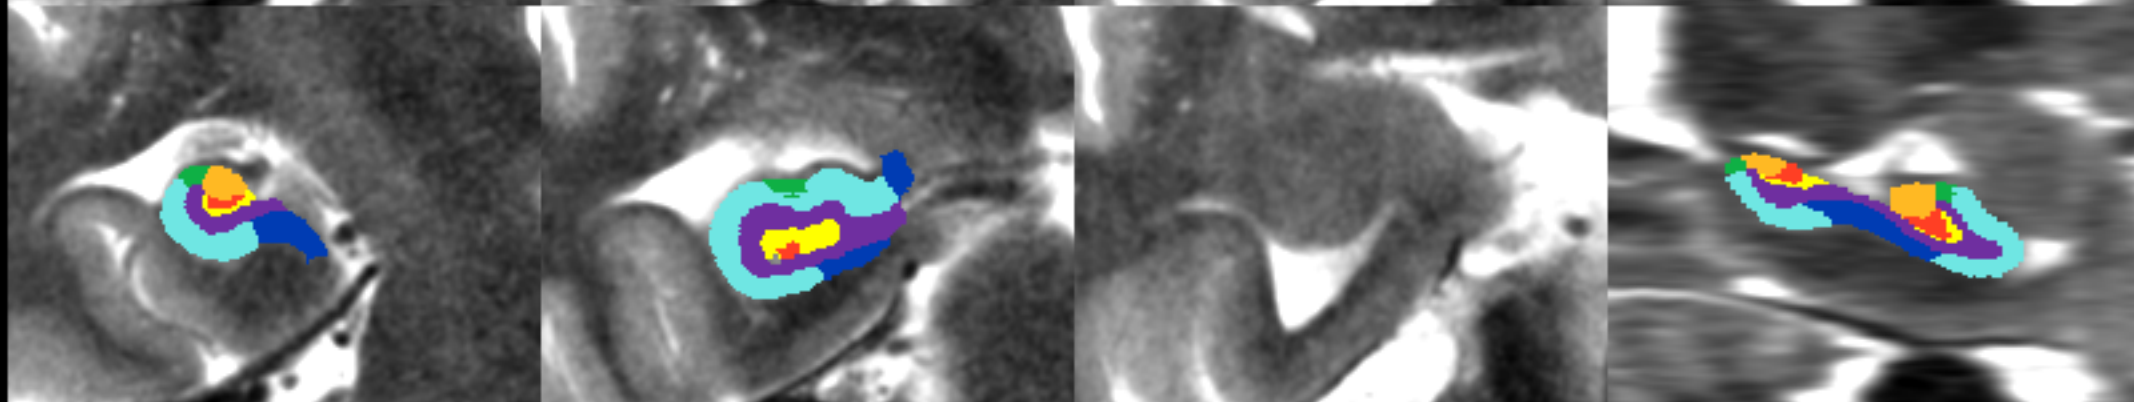

ashs

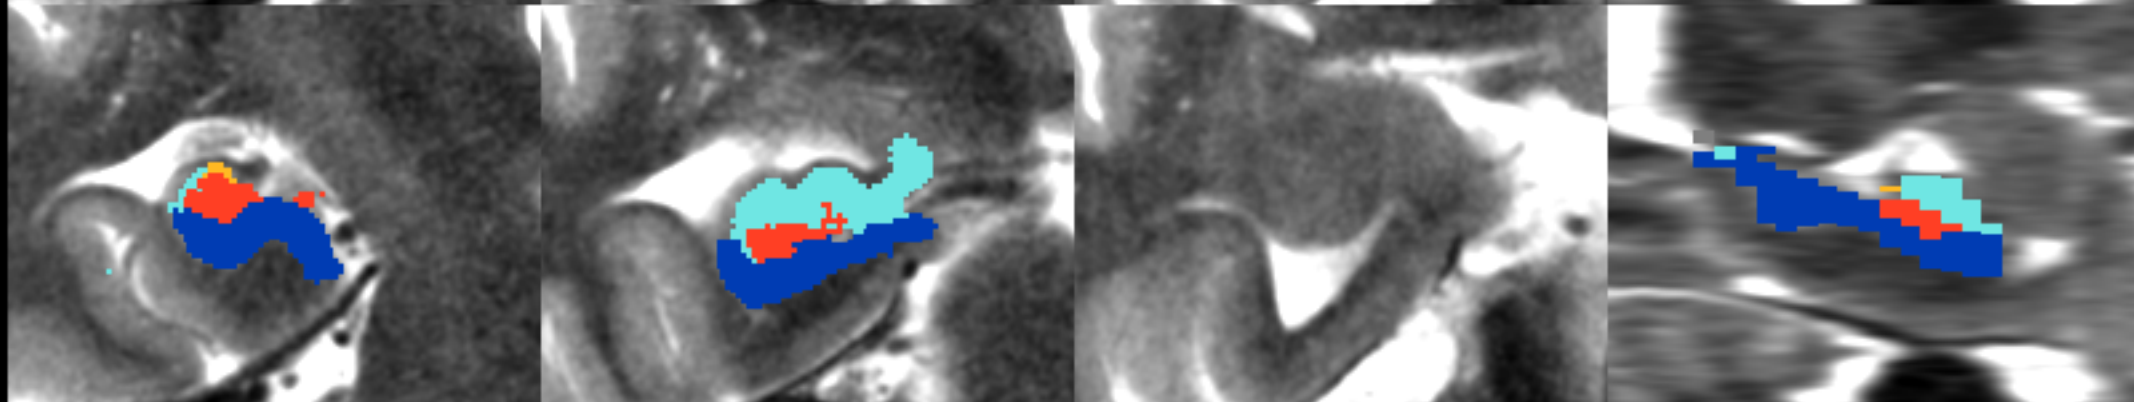

freesurfer

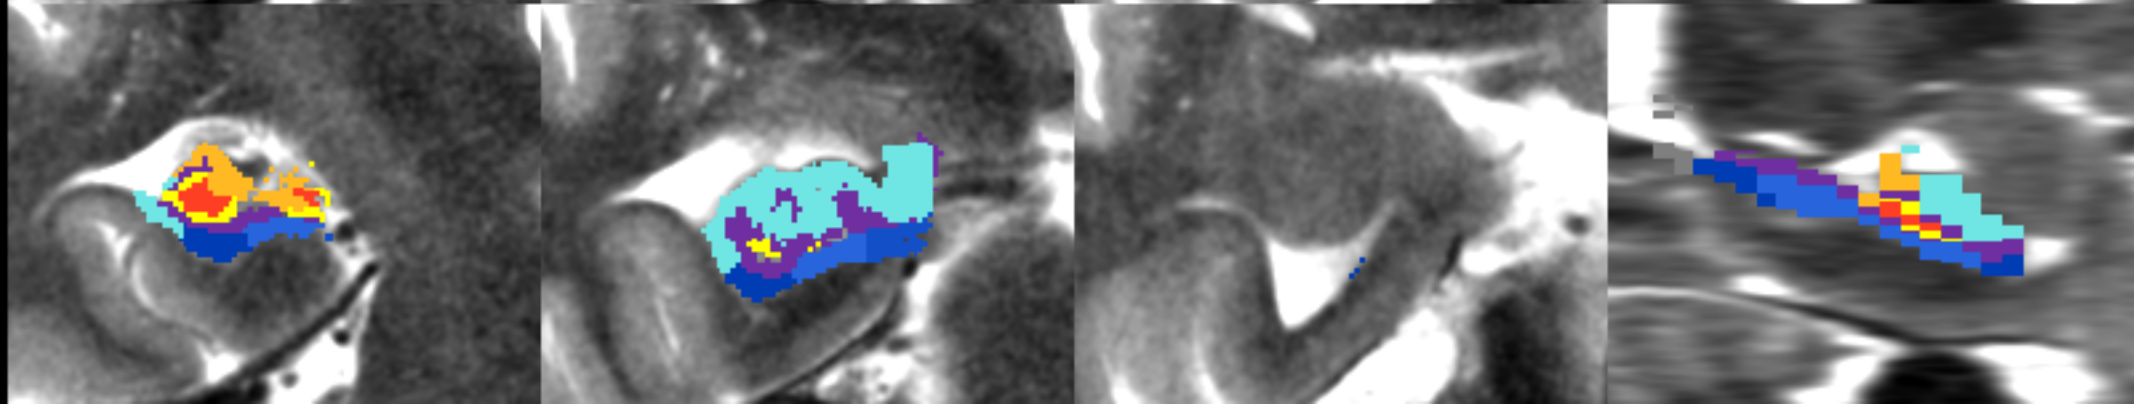

hemi=R,subject=9369902

MRI

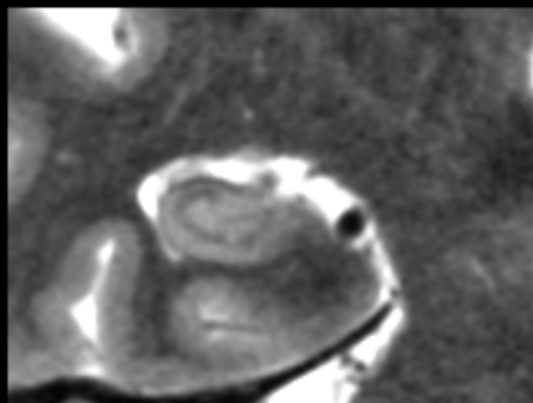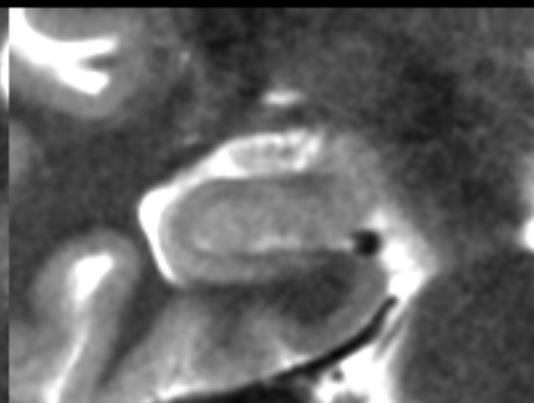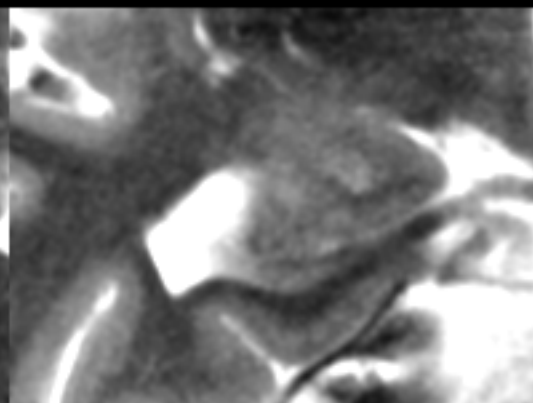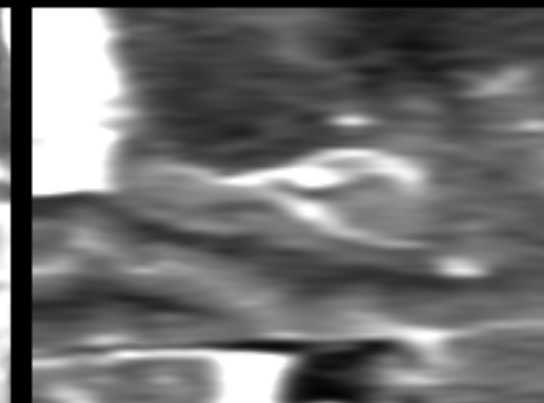

hippunfoldT1

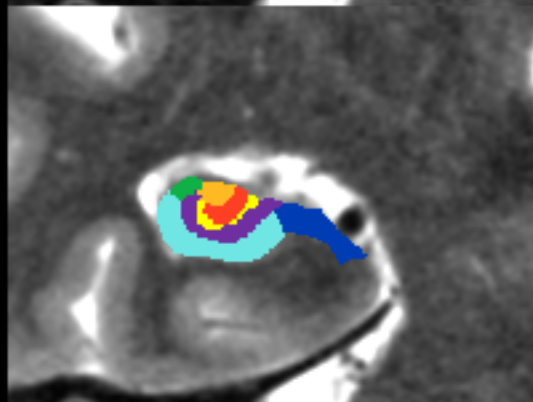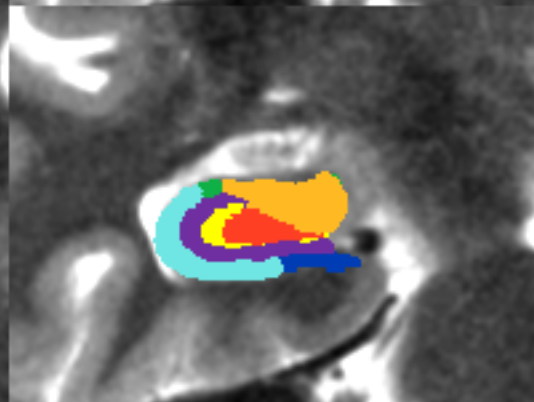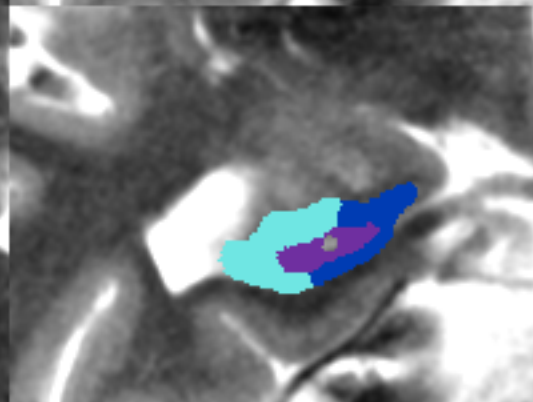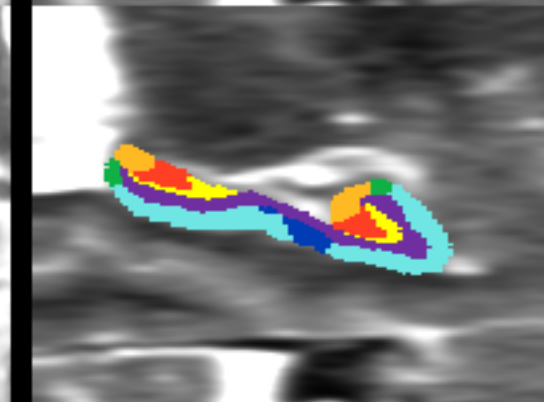

ashs

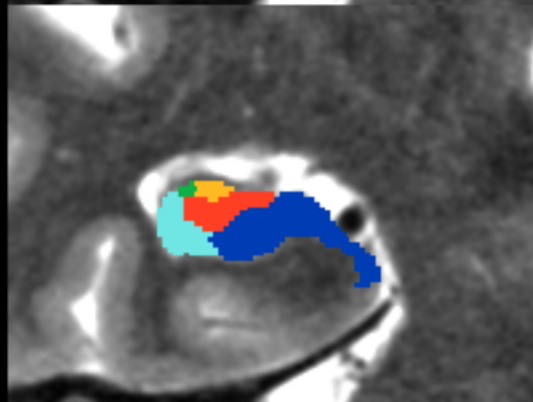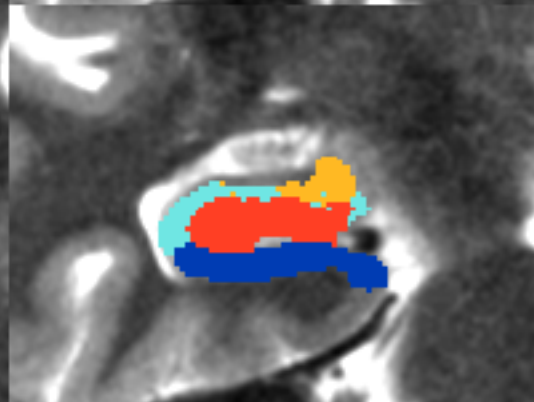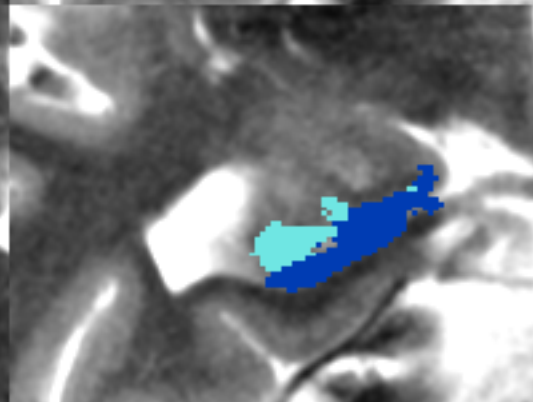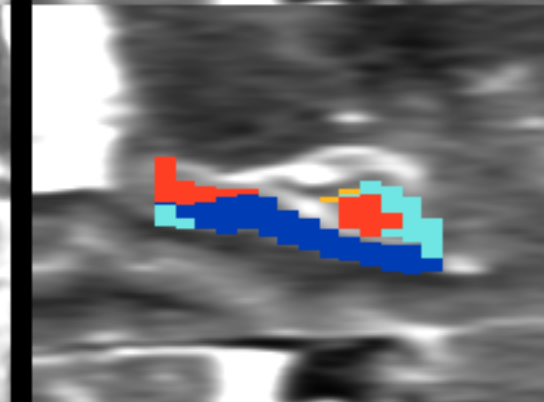

freesurfer

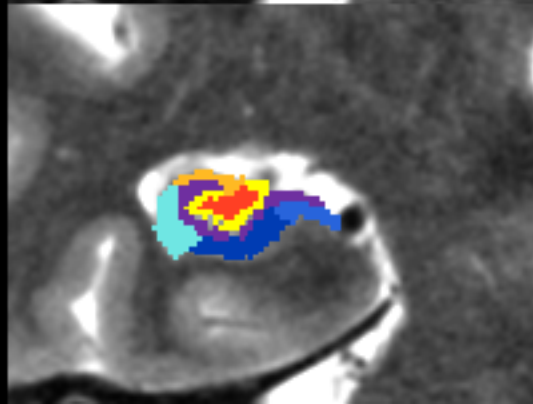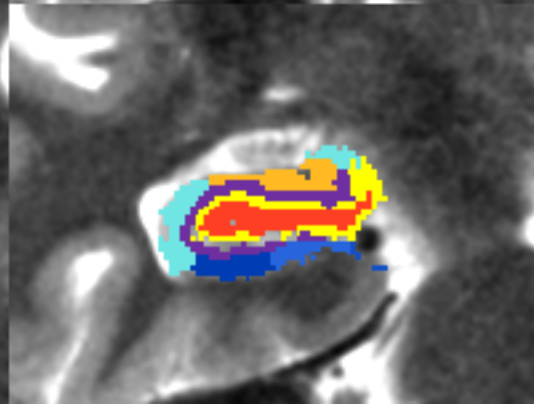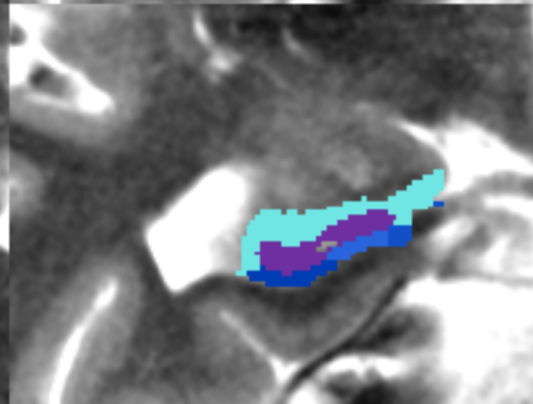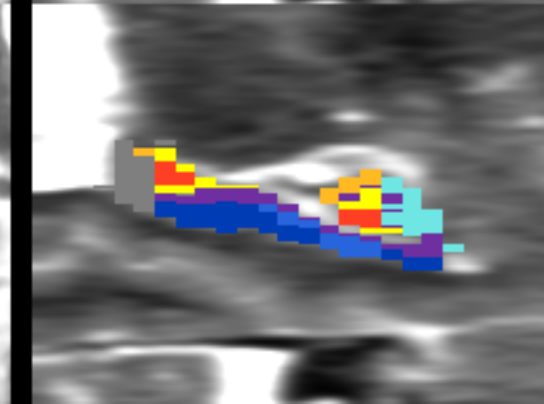

hemi=R,subject=9389605

MRI

hippunfoldT1

ashs

freesurfer

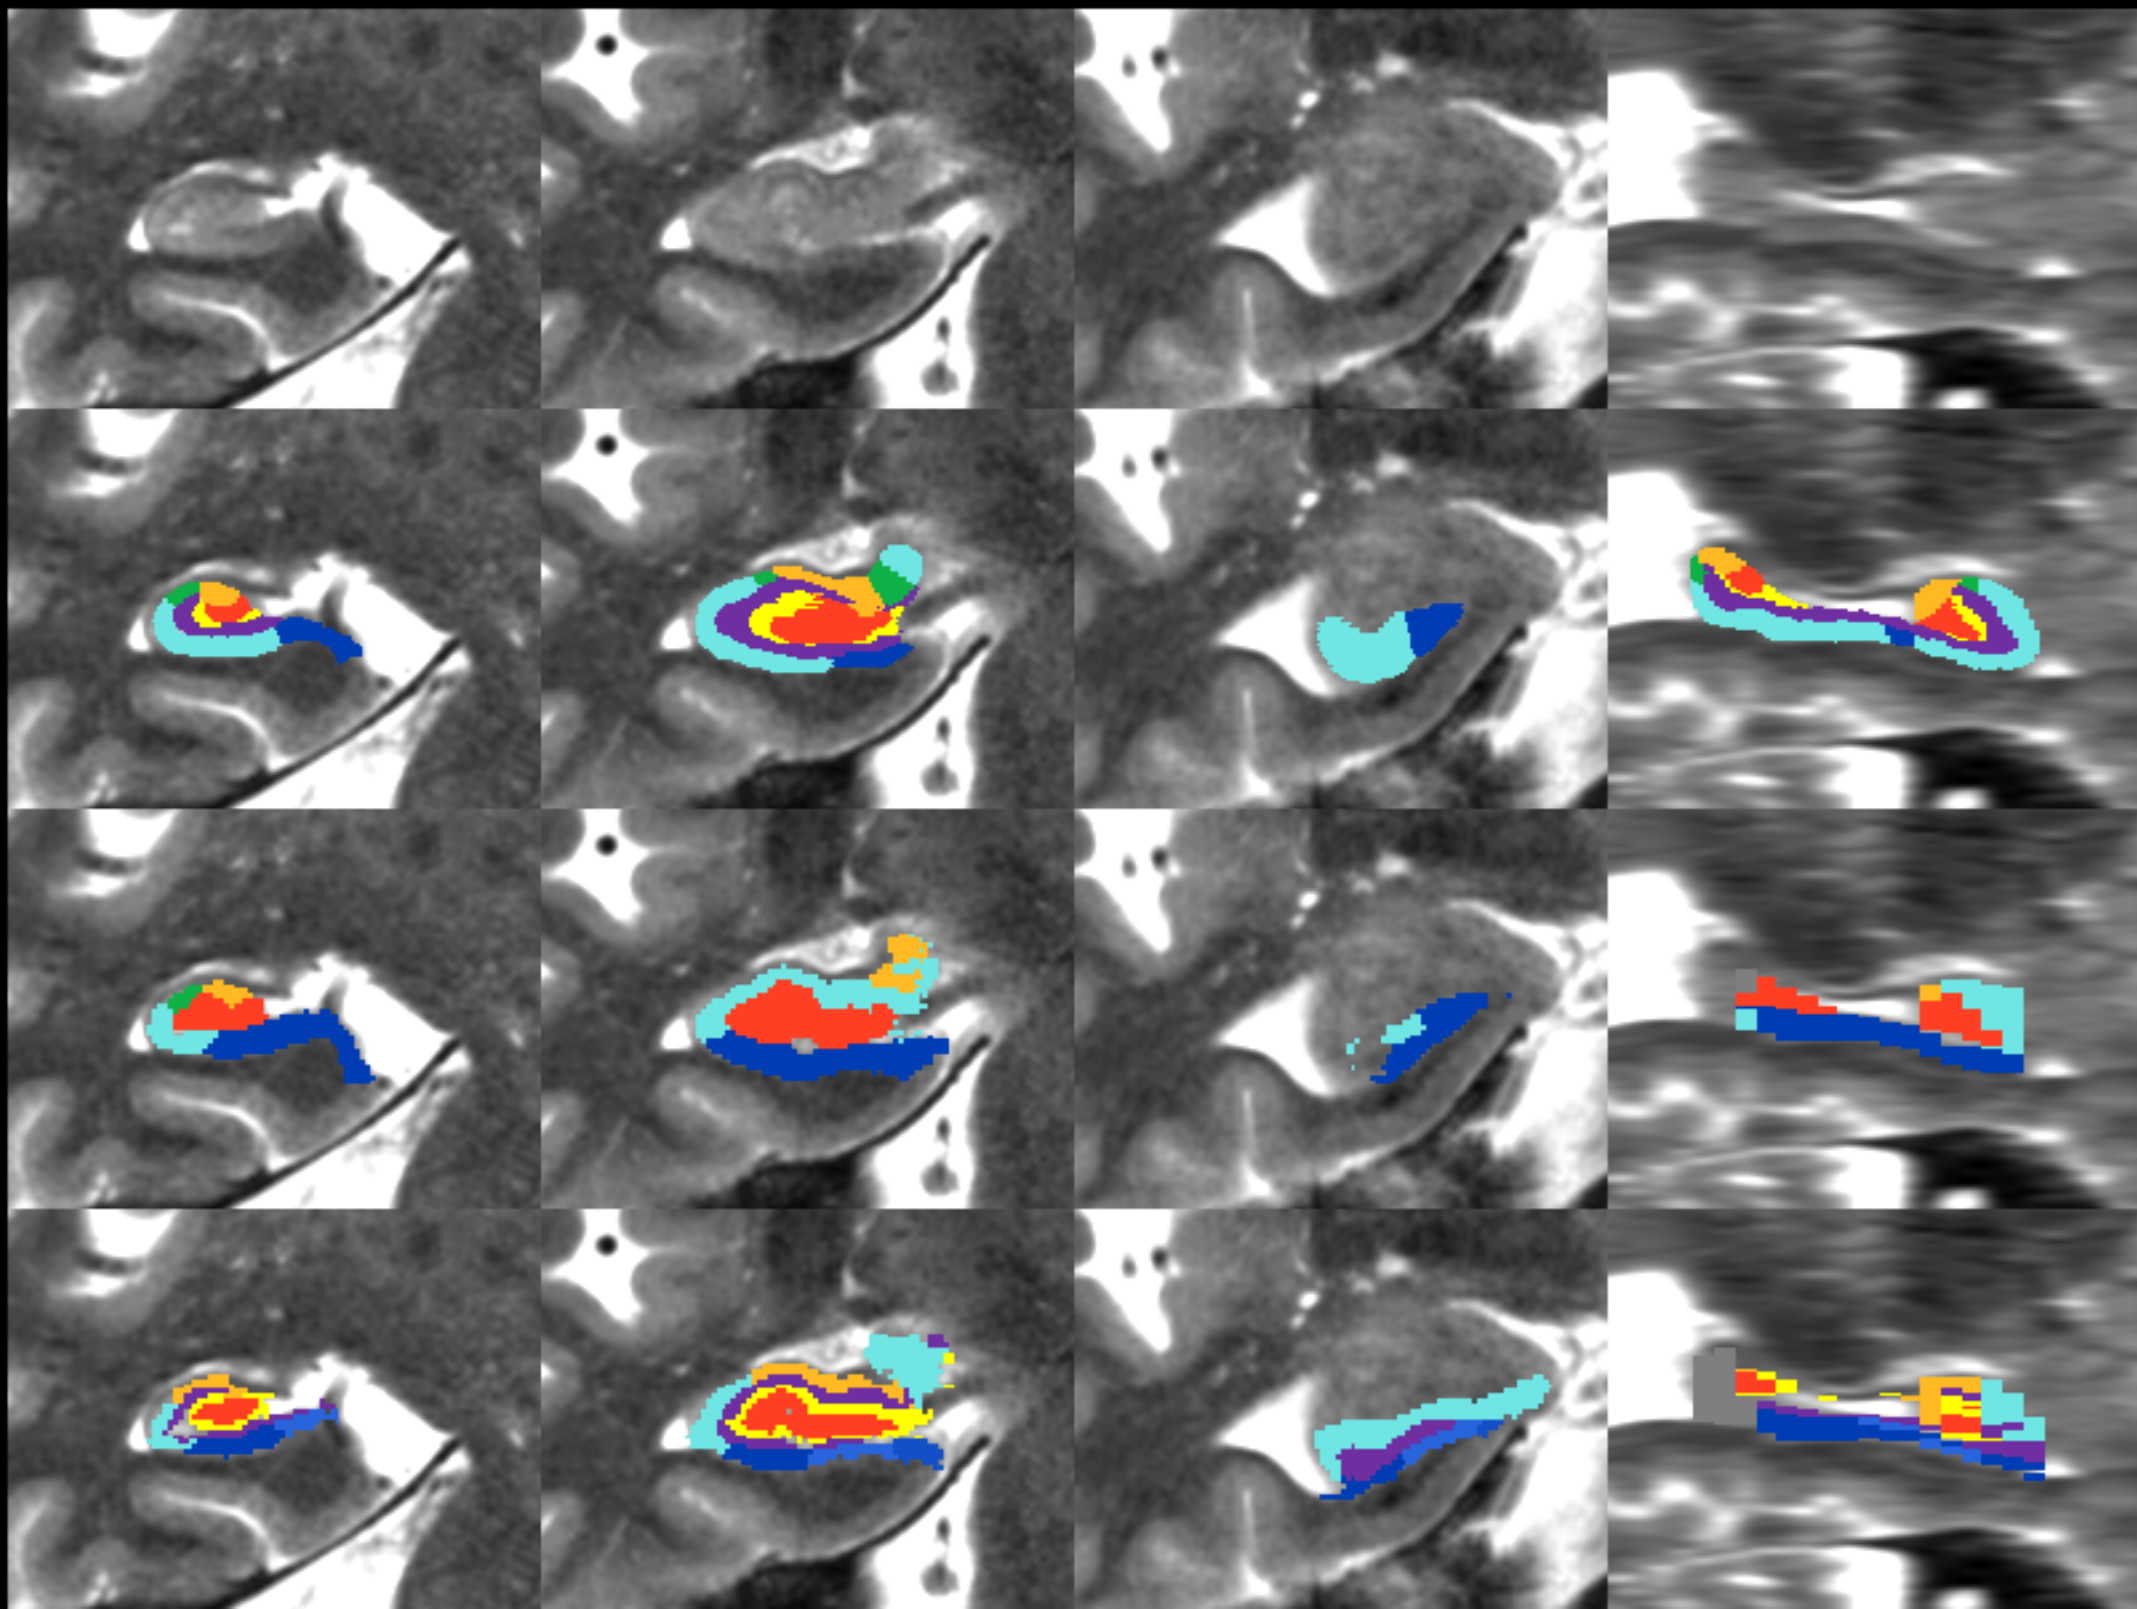

hemi=R,subject=9436688

MRI

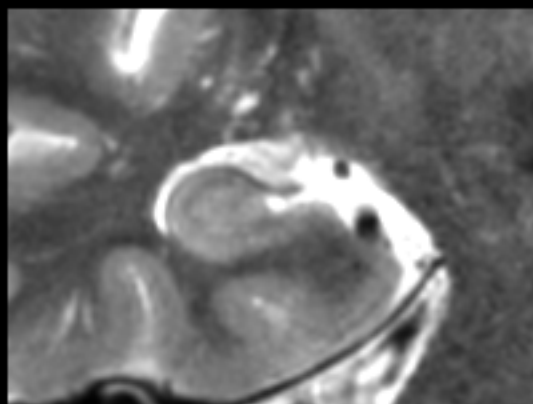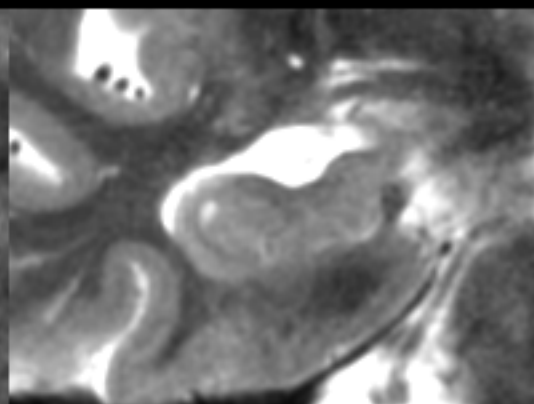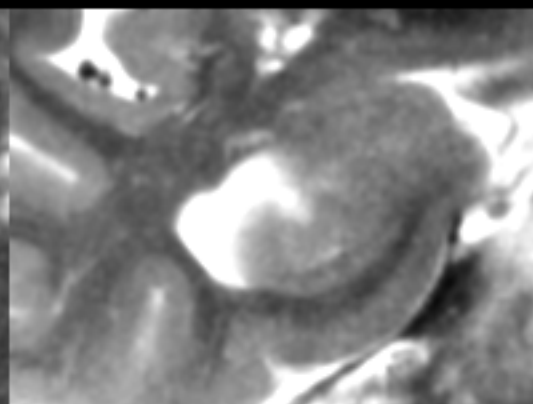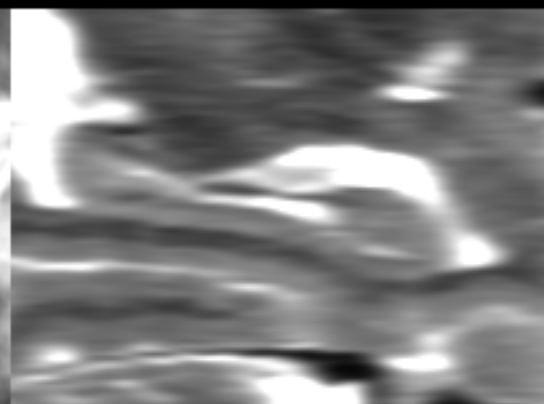

hippunfoldT1

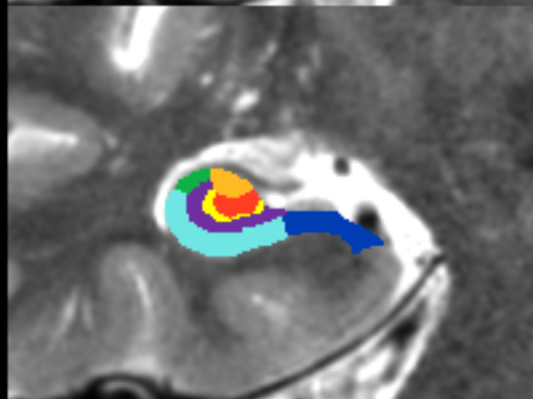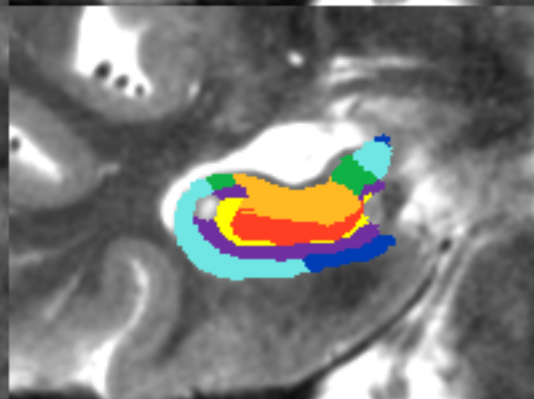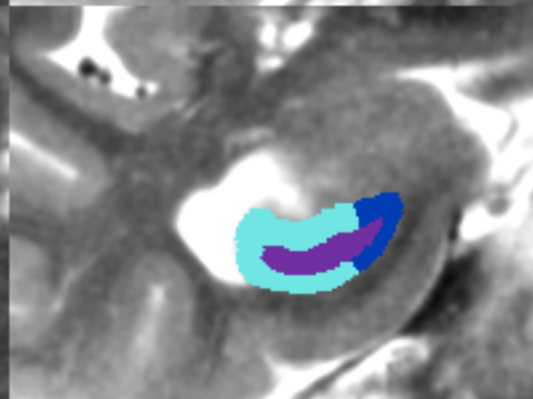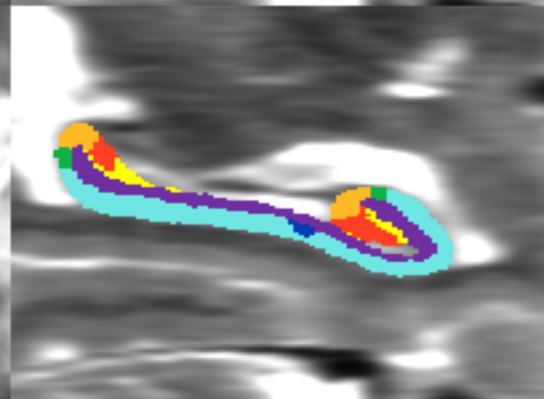

ashes

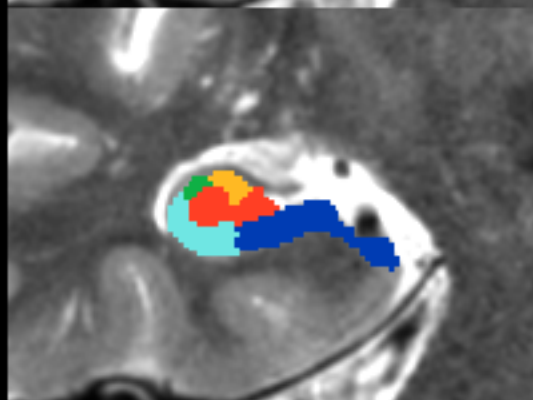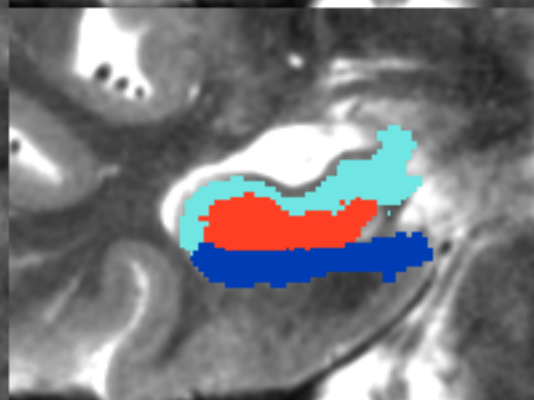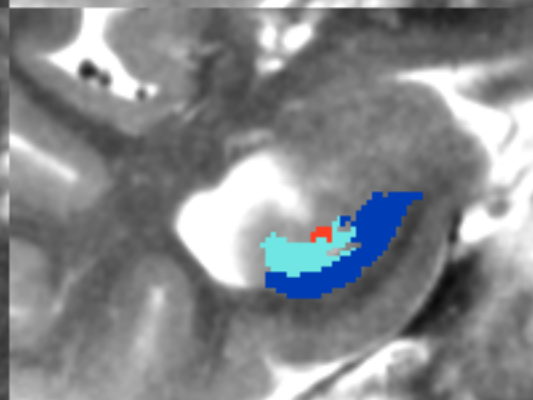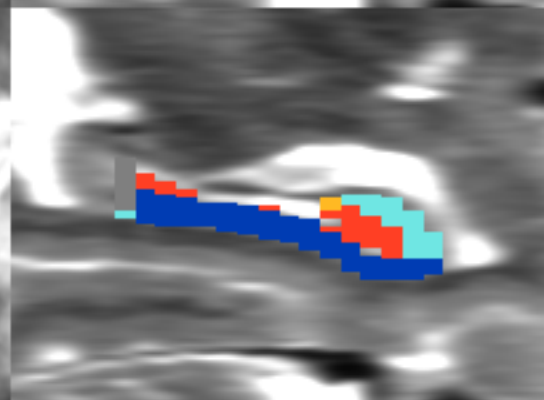

freesurfer

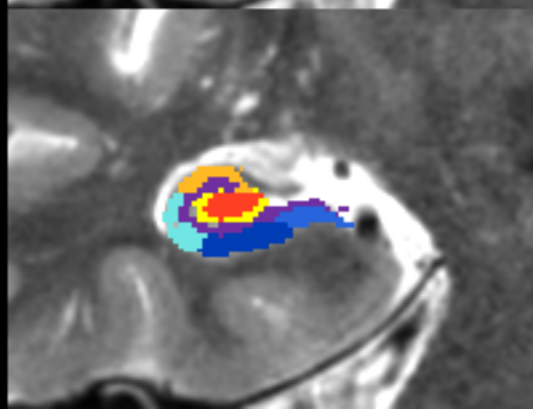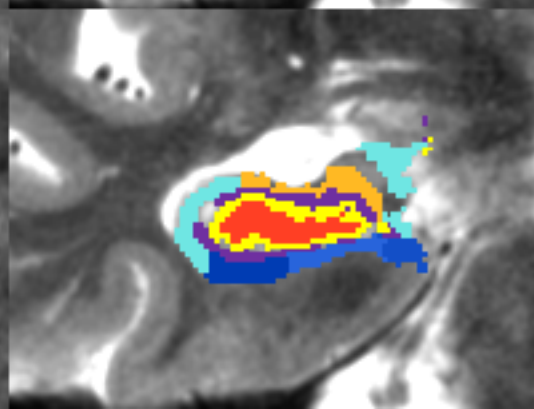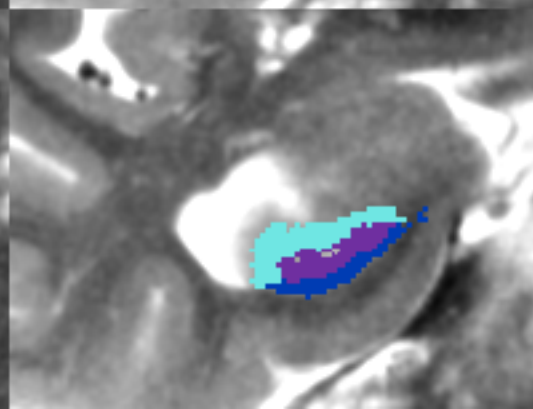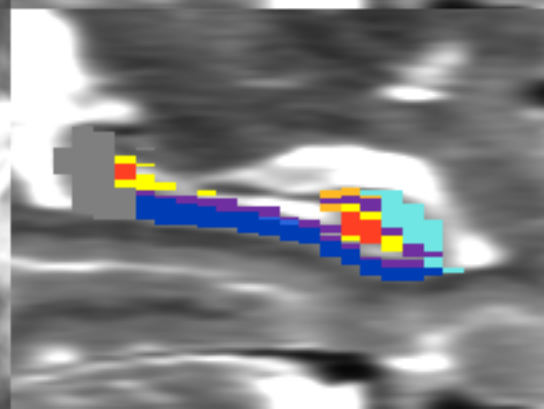



hemi=R,subject=9460079

MRI

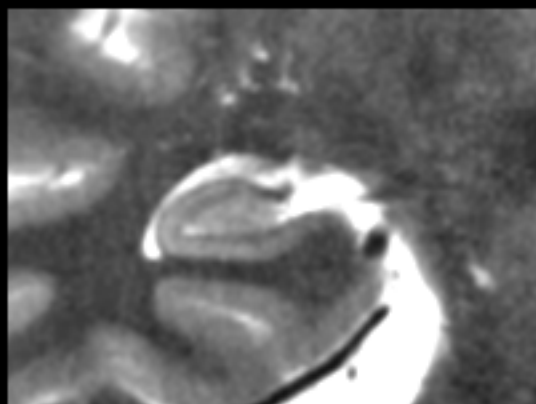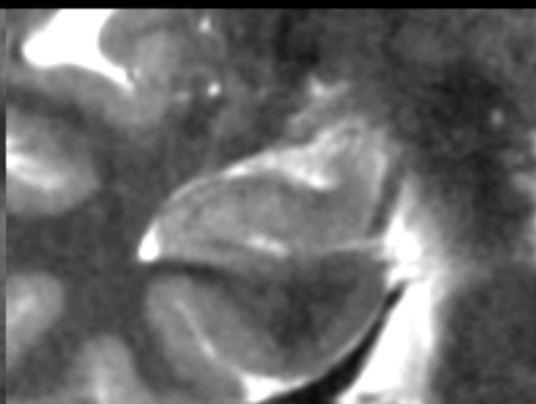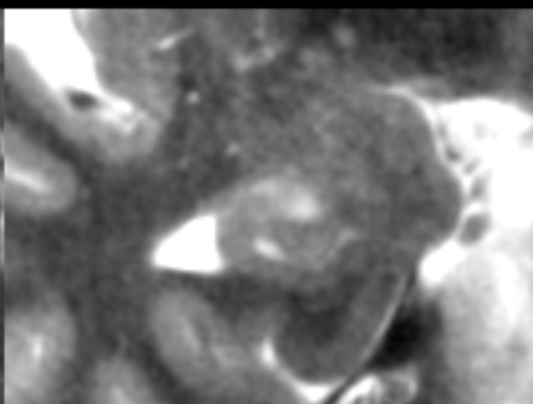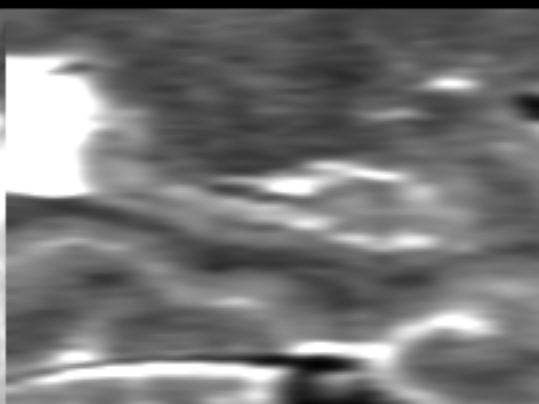

hippunfoldT1

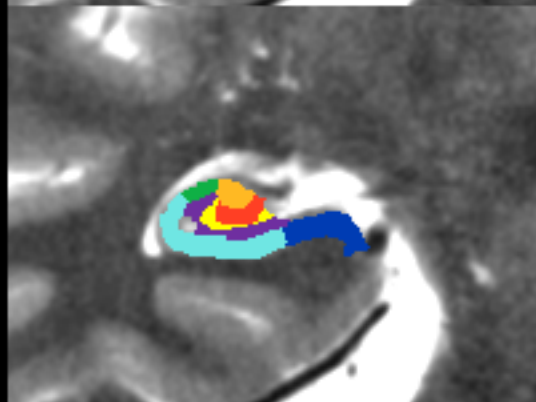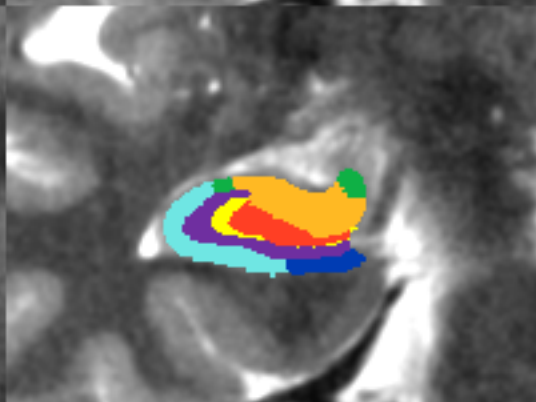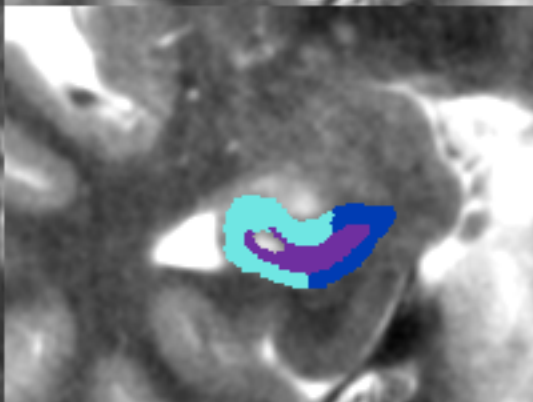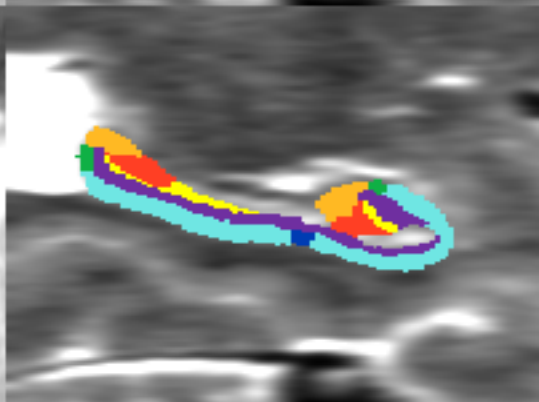

ashs

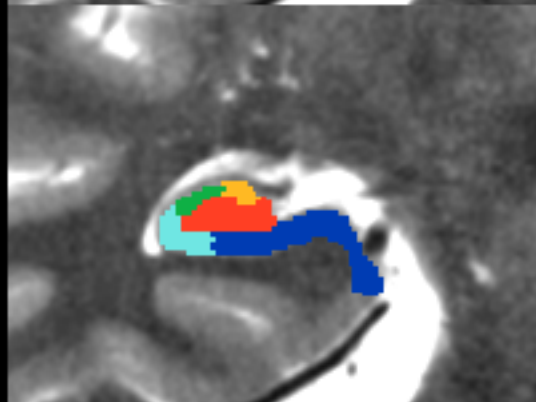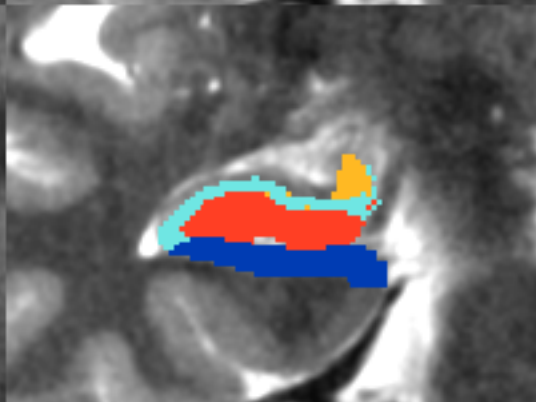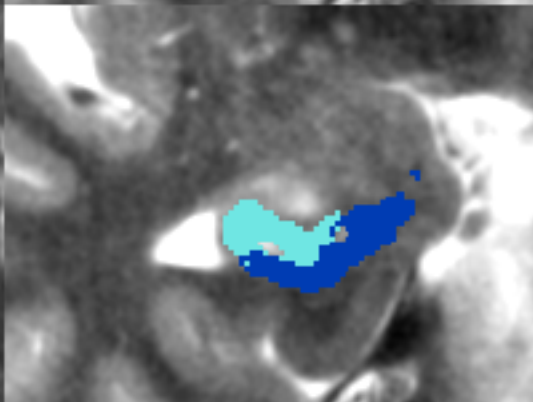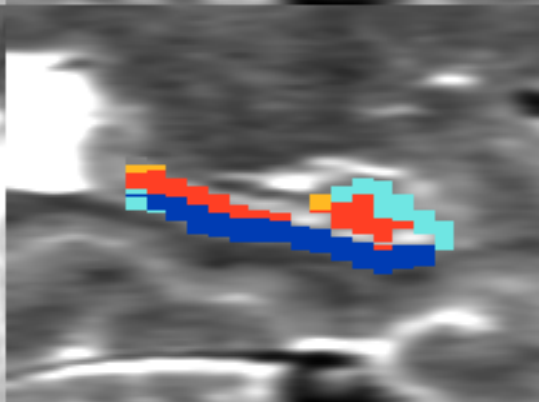

freesurfer

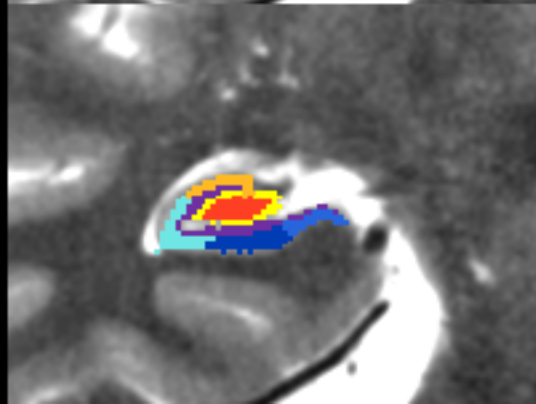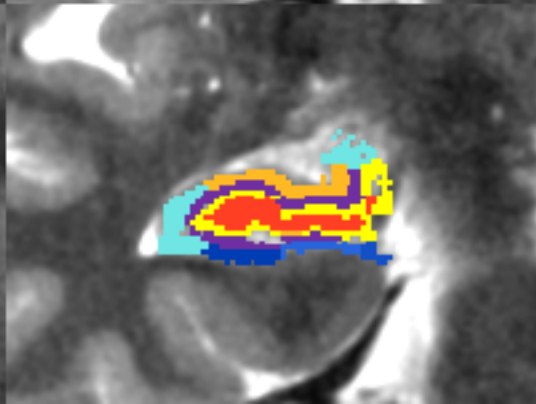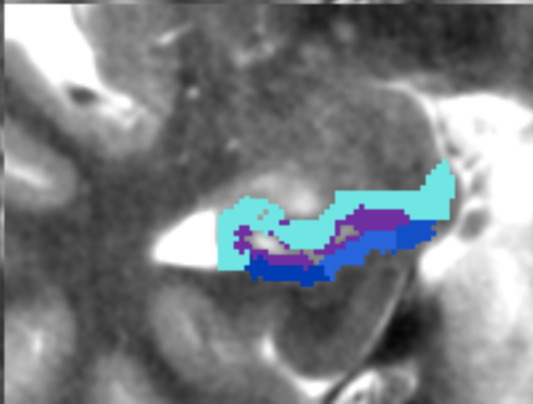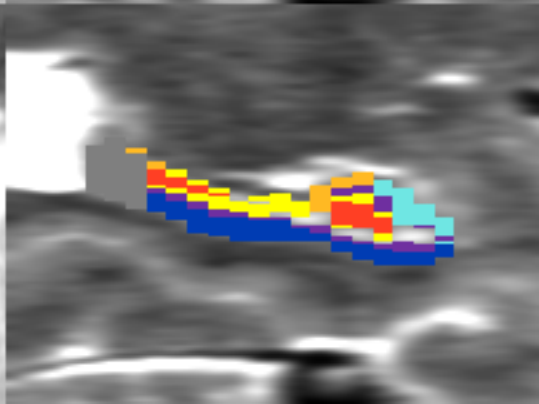

hemi=R,subject=9481794

MRI

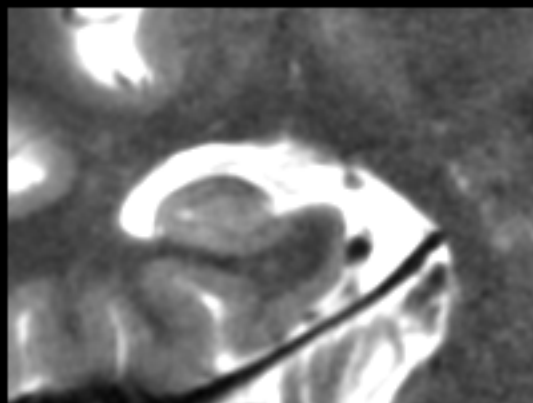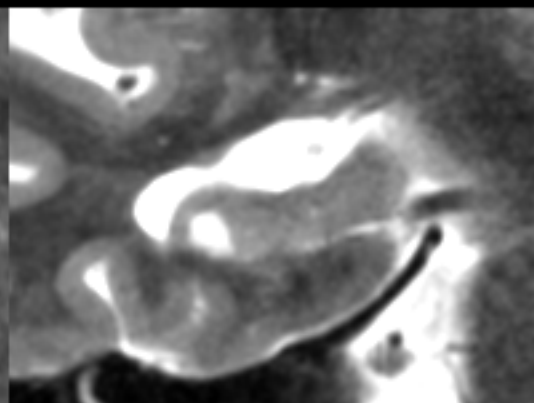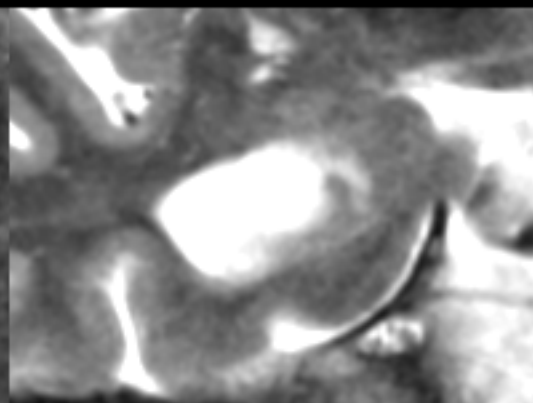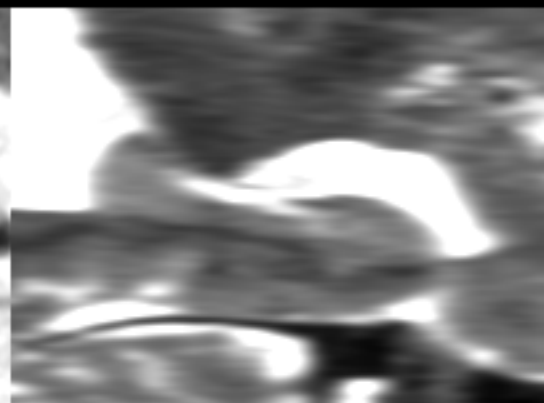

hippunfoldT1

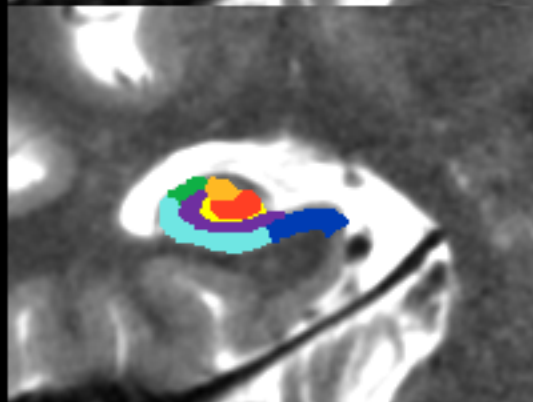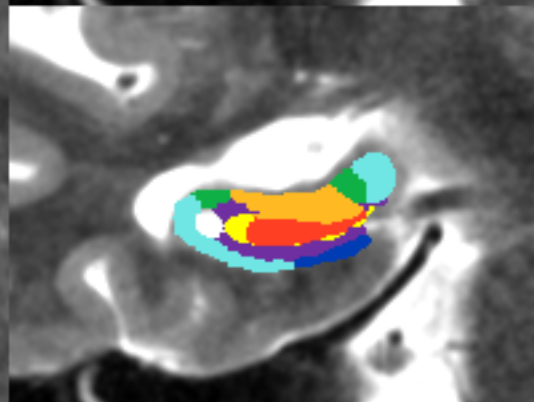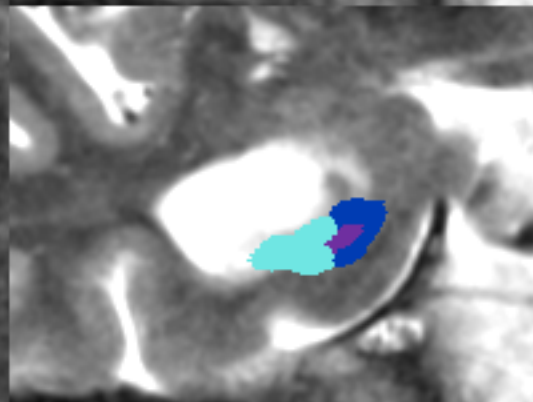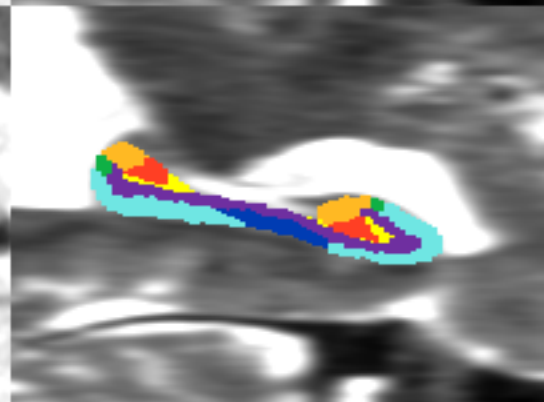

ashs

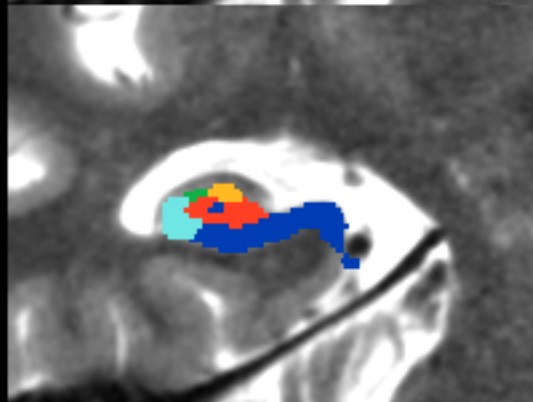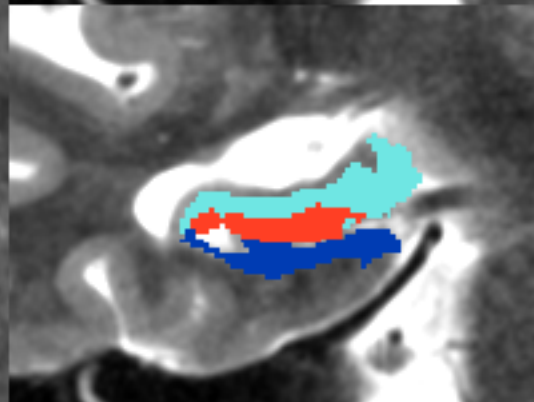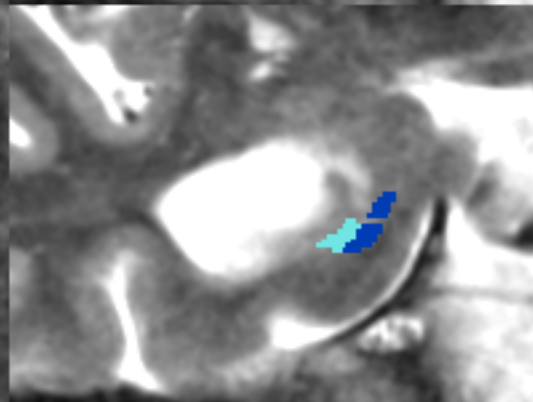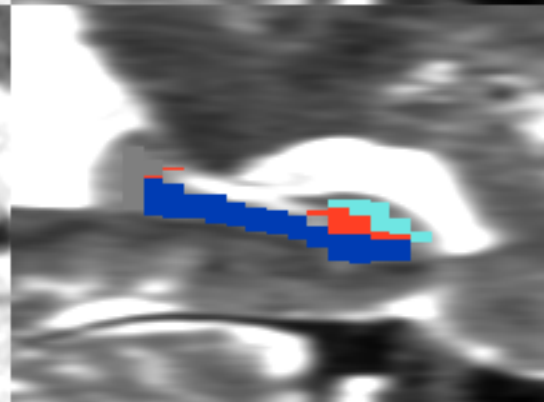

freesurfer

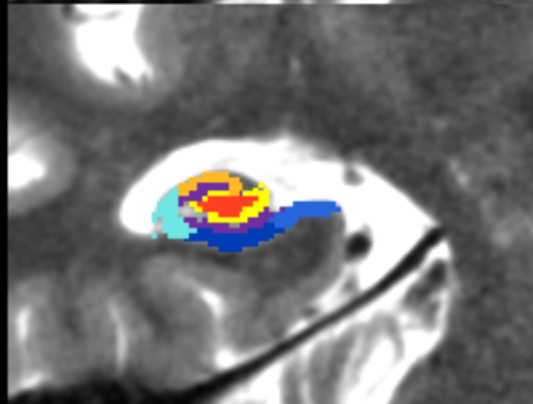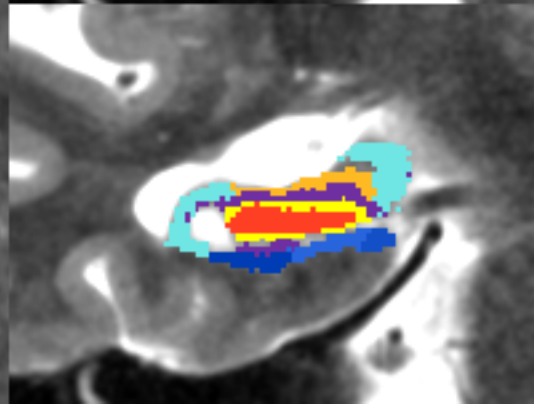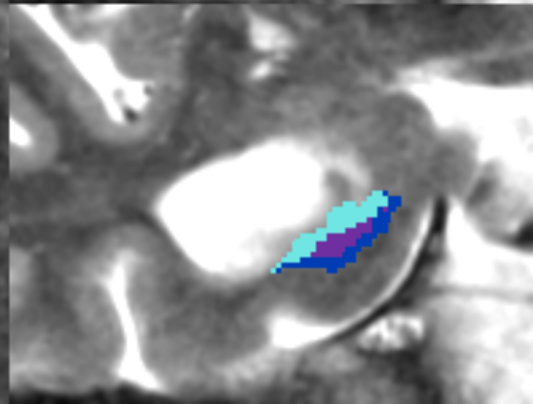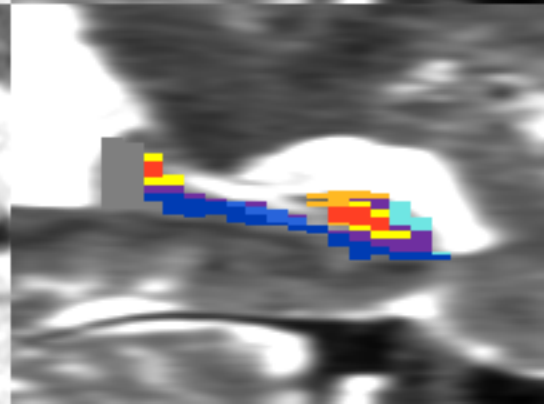

hemi=R,subject=9515684

MRI

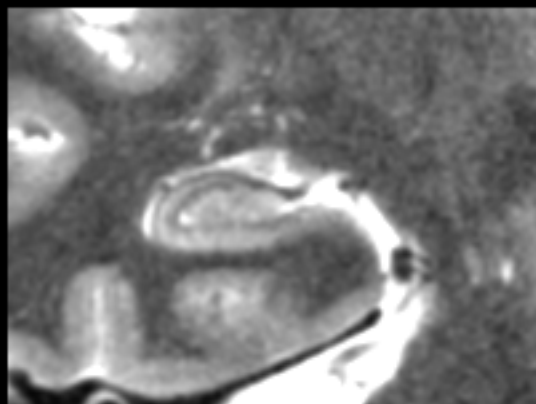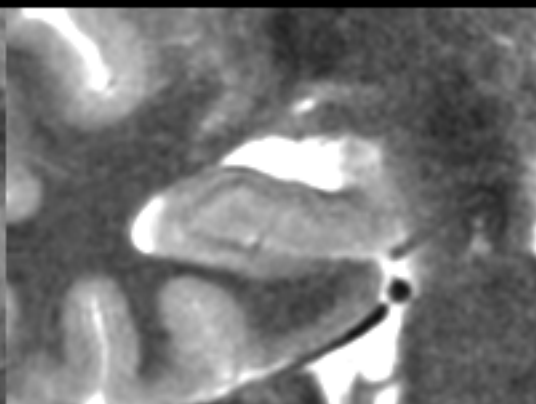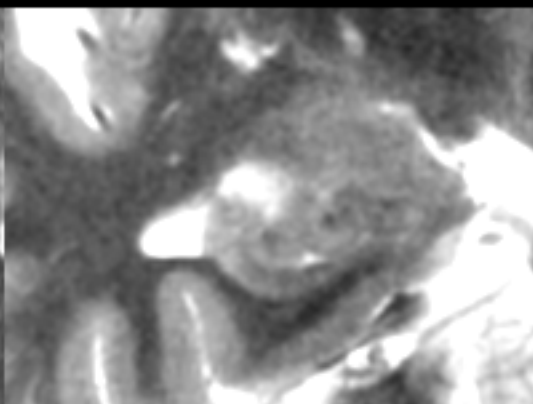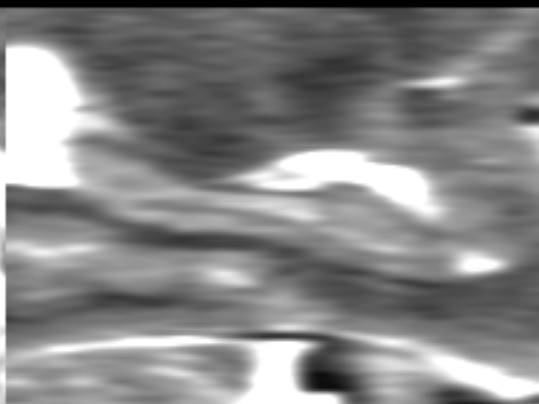

hippunfoldT1

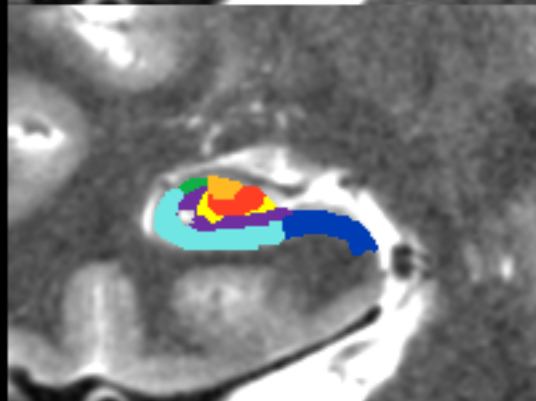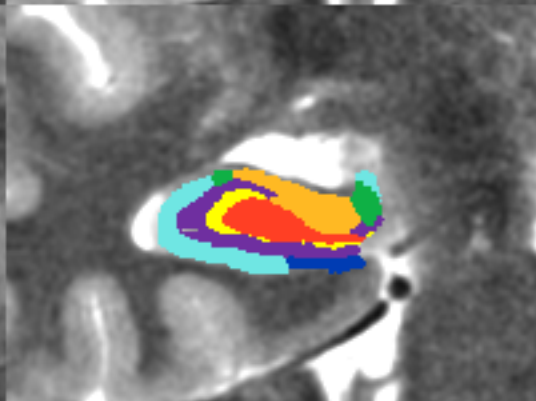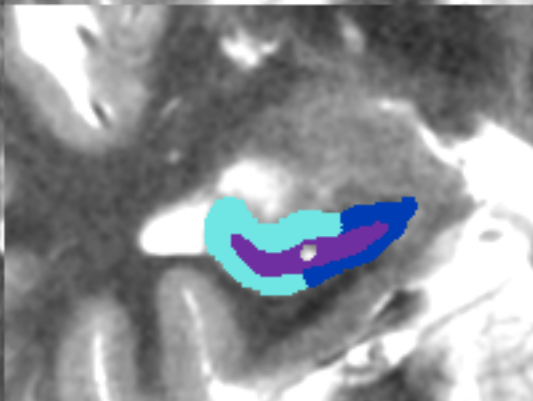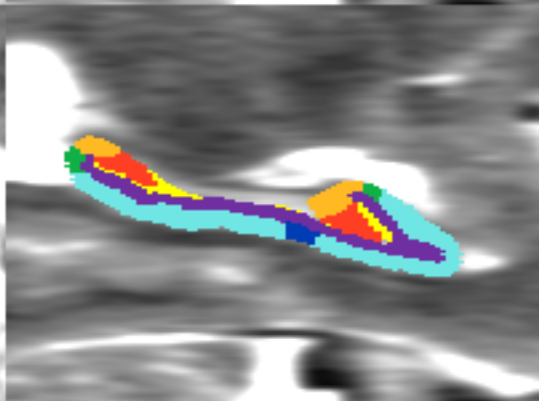

ashs

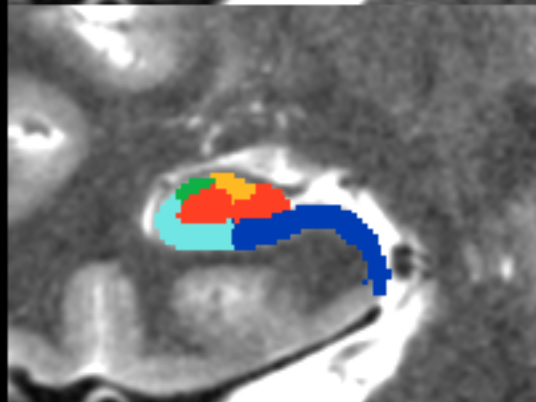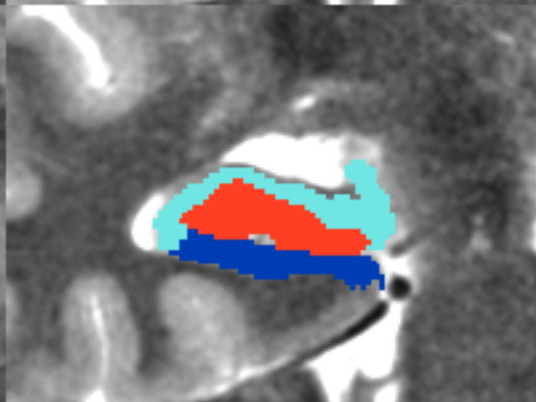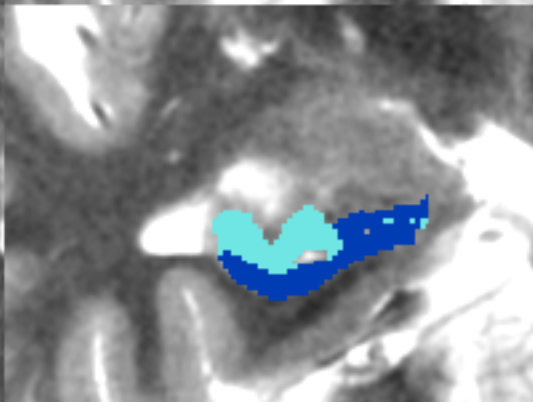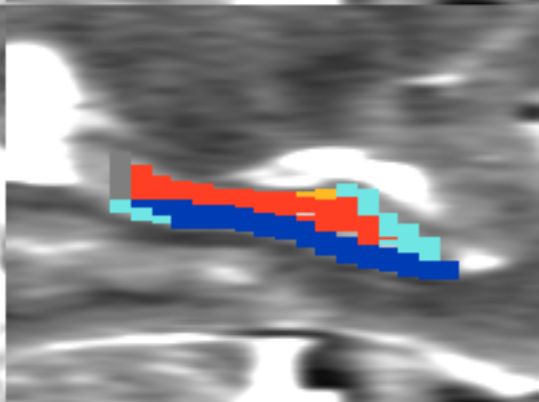

freesurfer

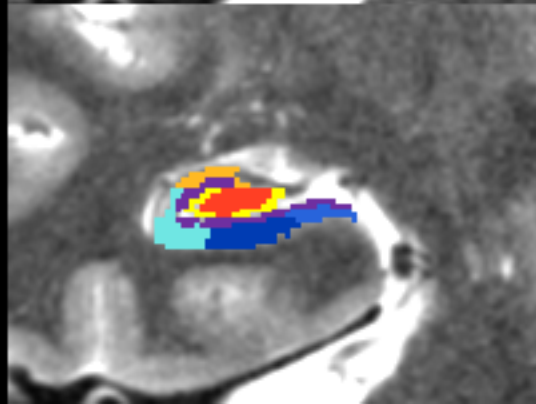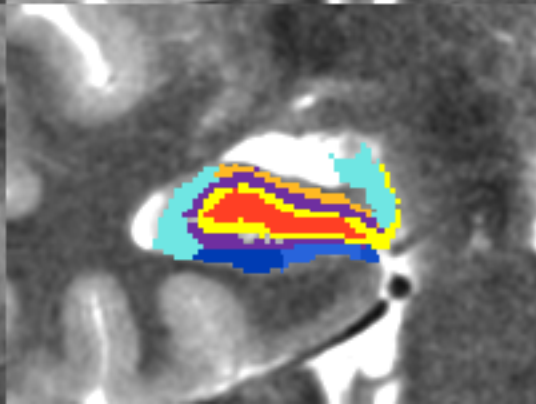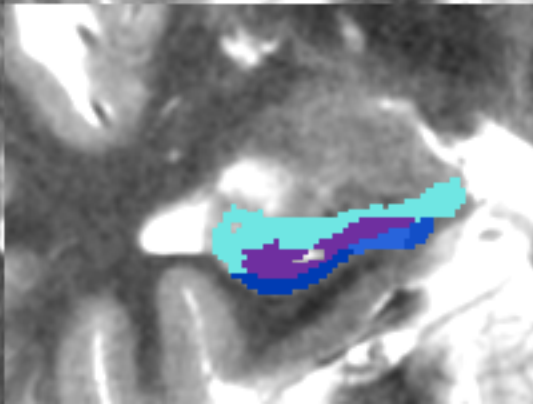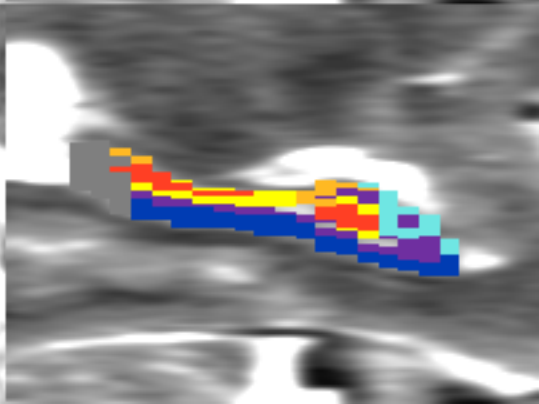

hemi=R,subject=9548396

MRI

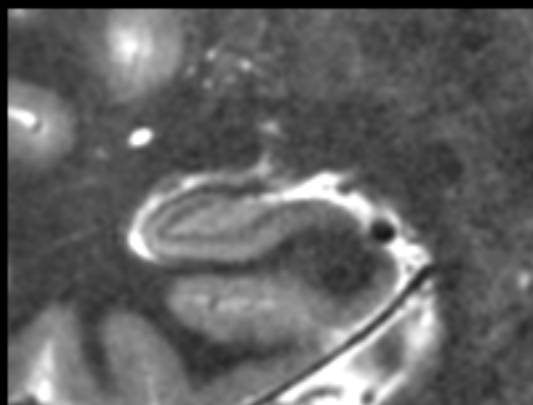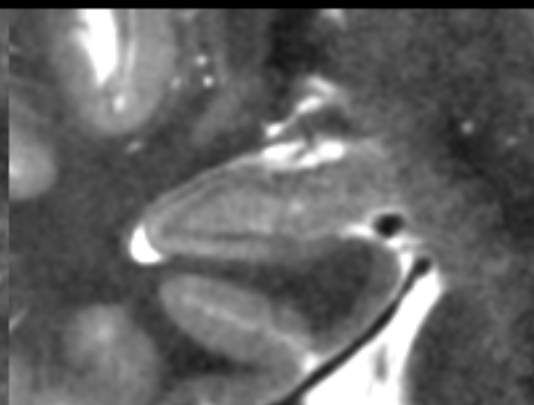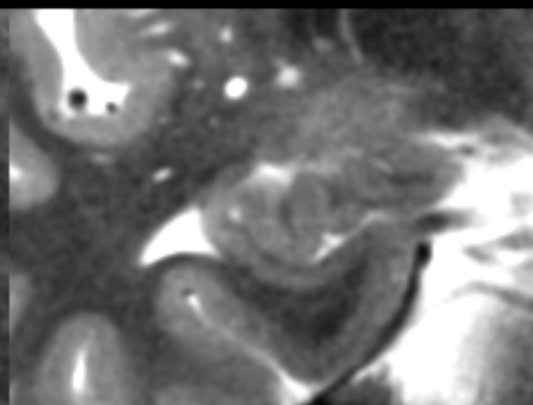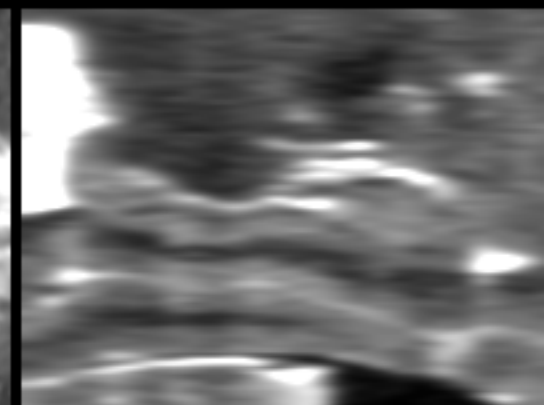

hippunfoldT1

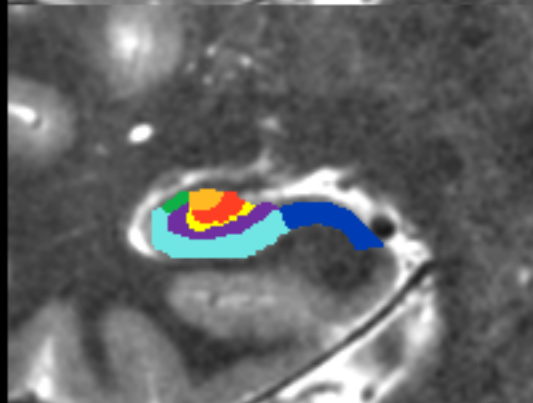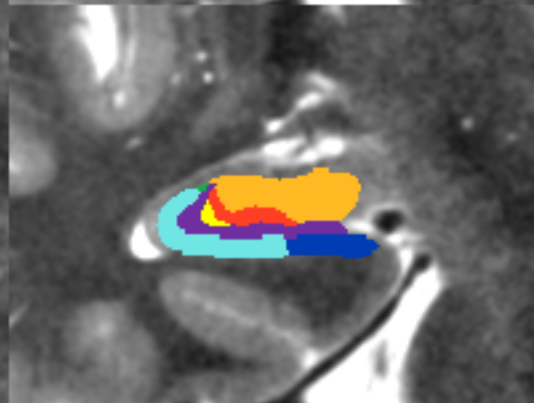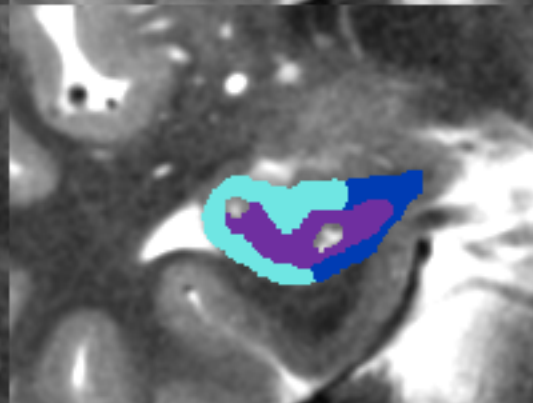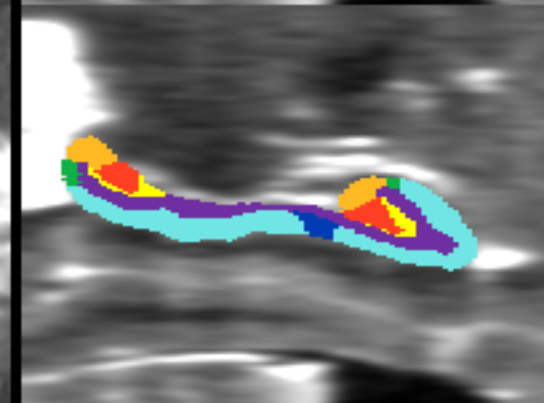

ashs

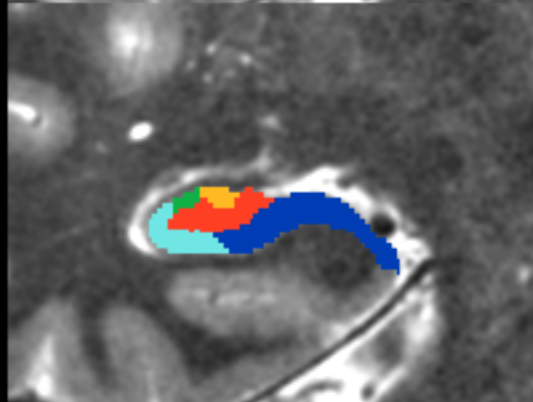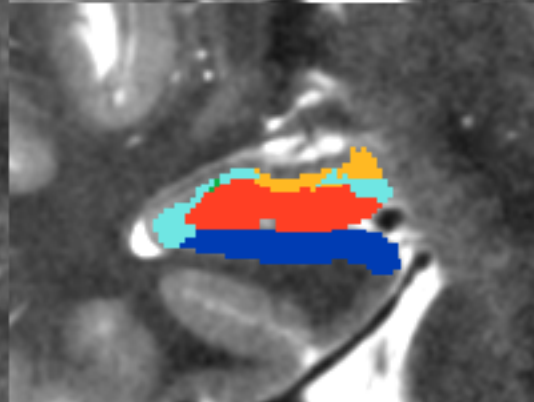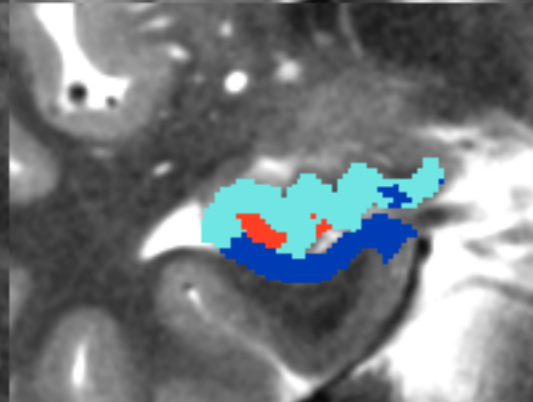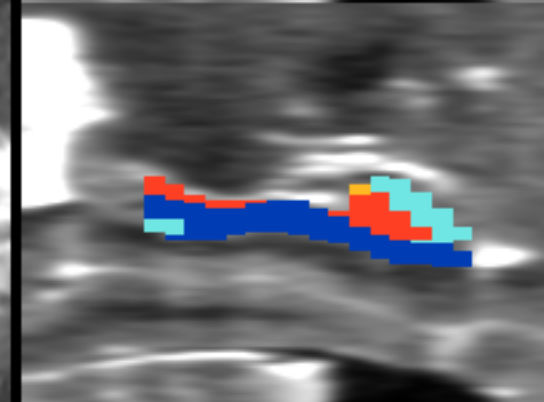

freesurfer

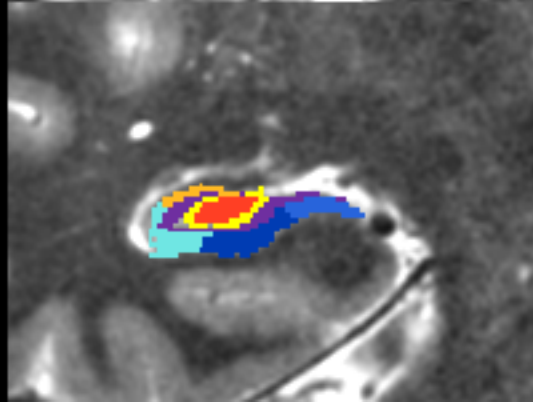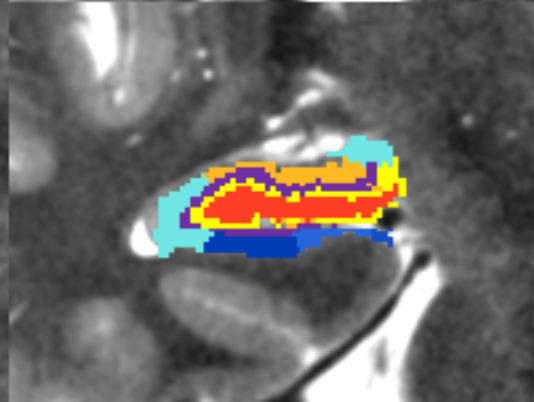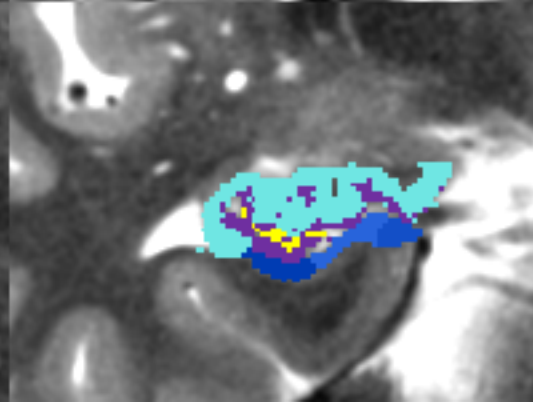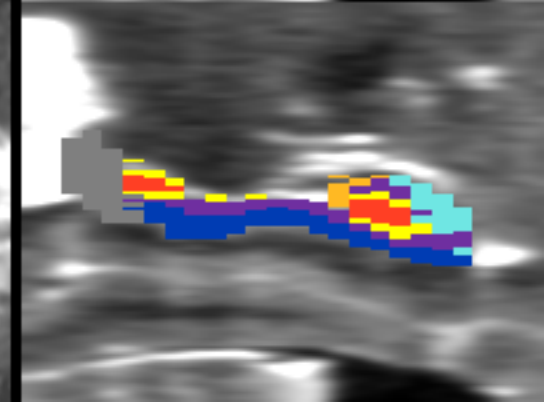

hemi=R,subject=9559806

MRI

hippunfoldT1

ashs

freesurfer

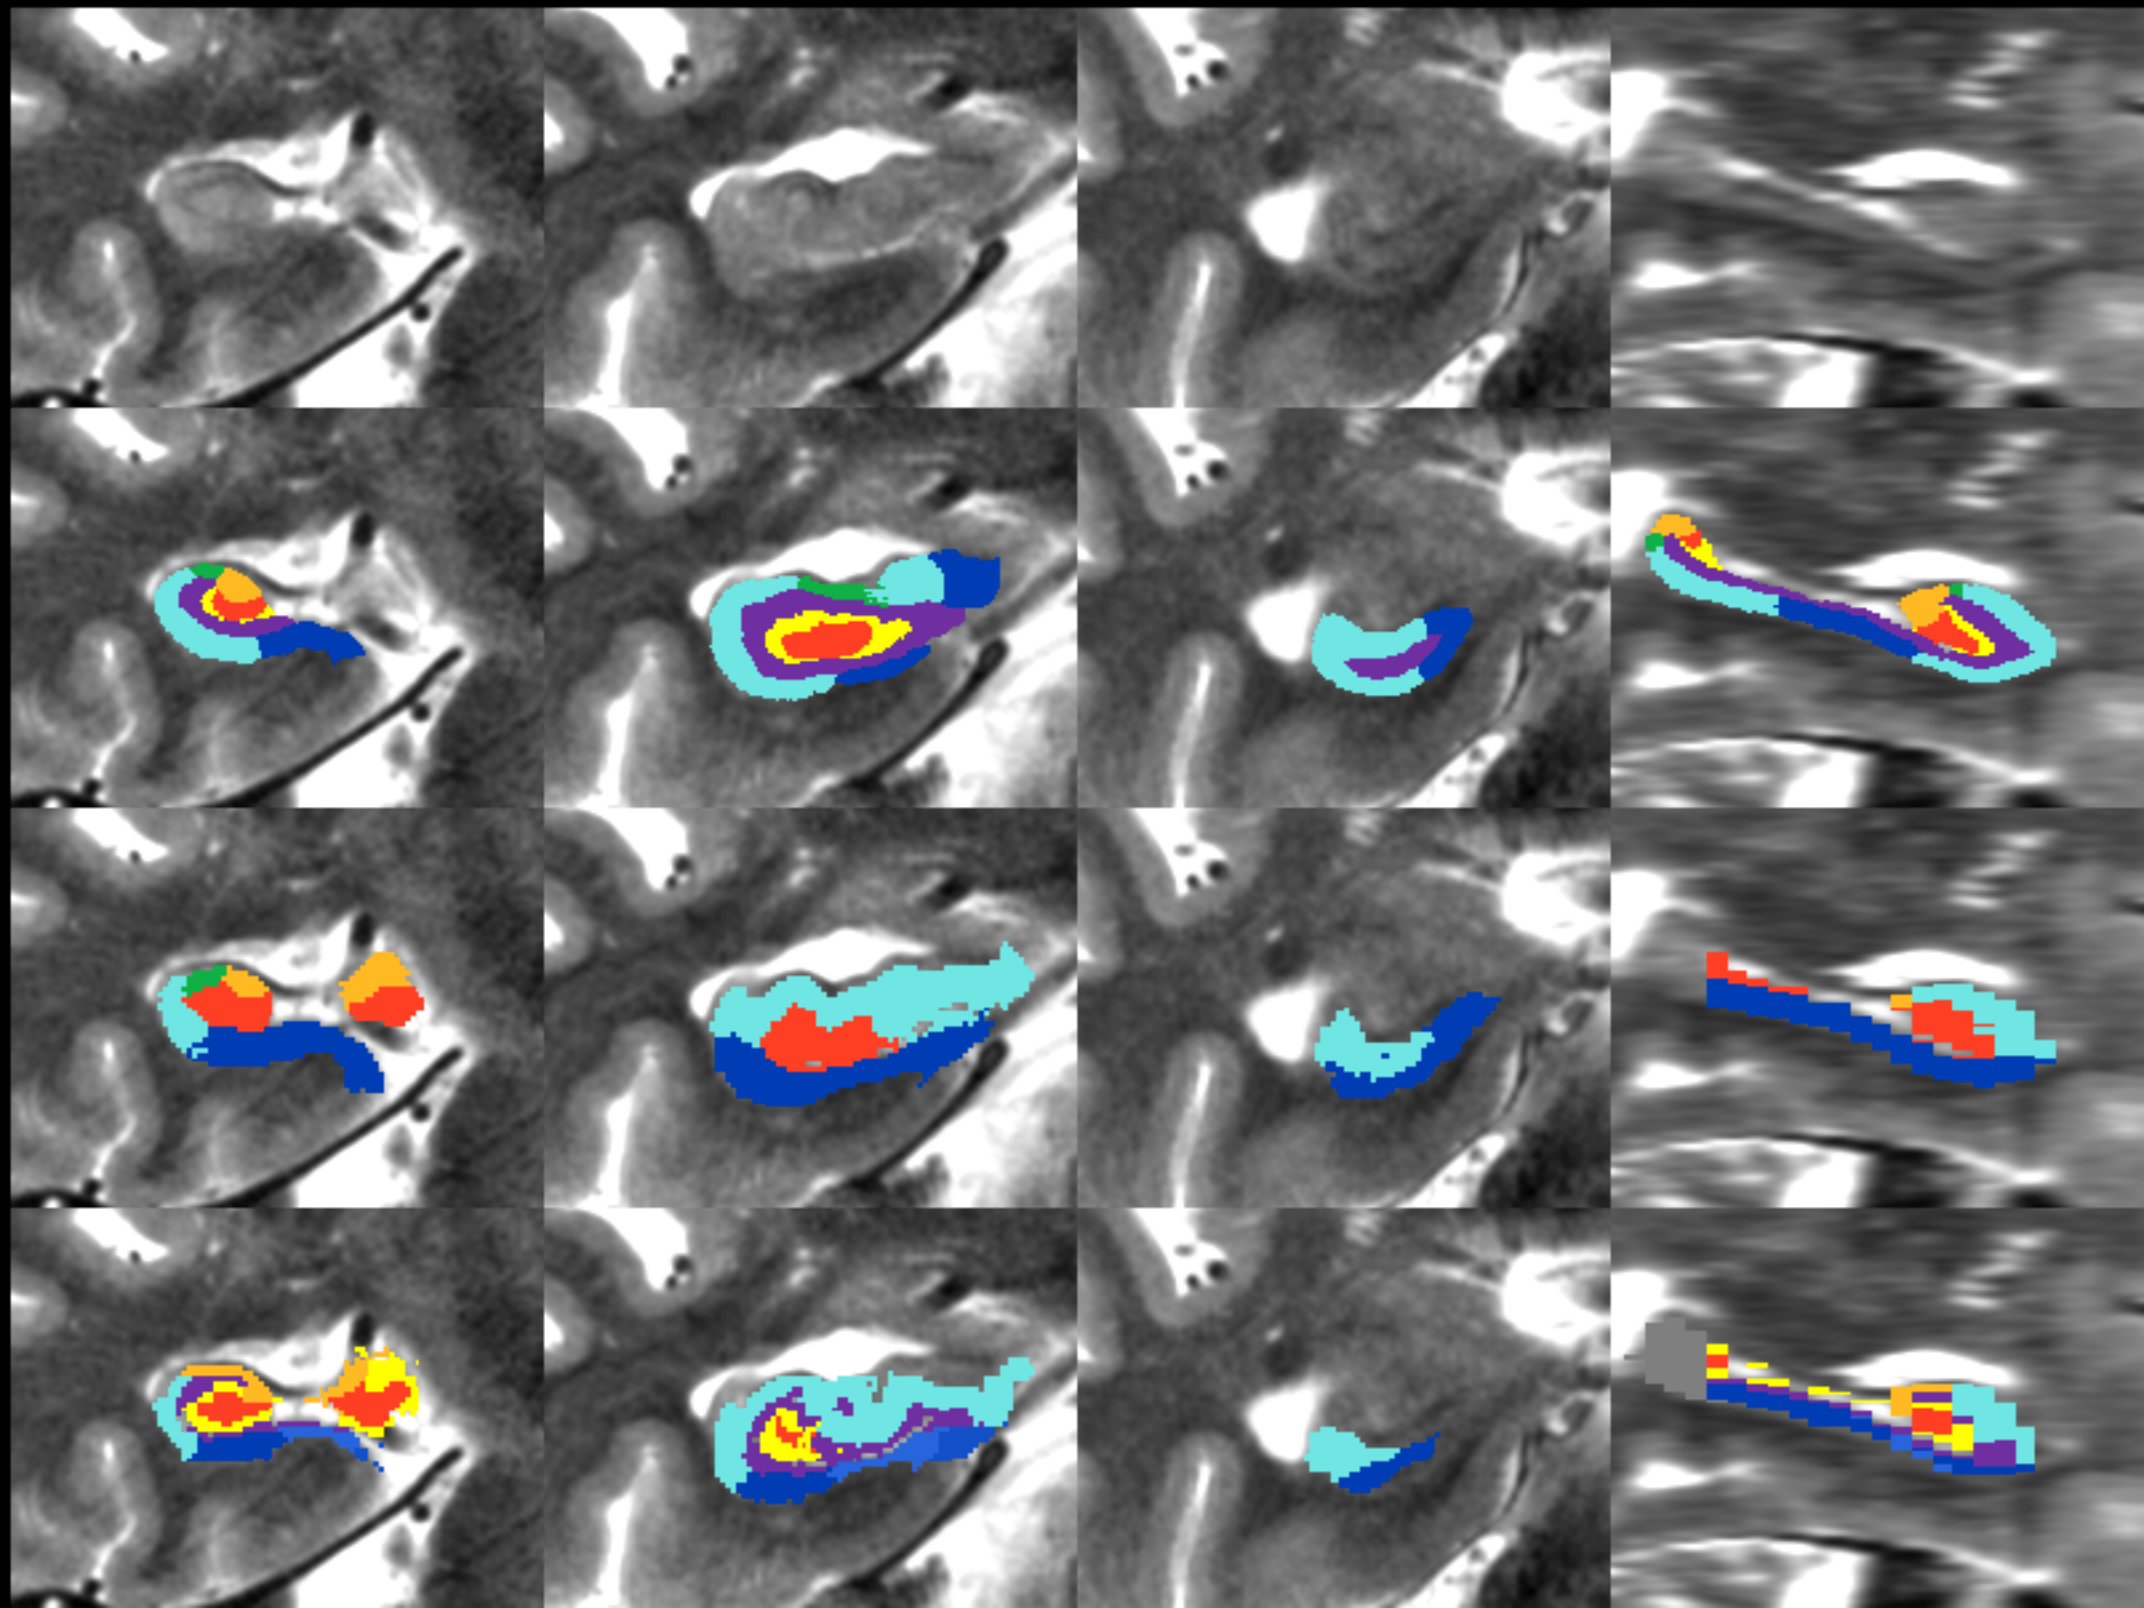

hemi=R,subject=9572797

MRI

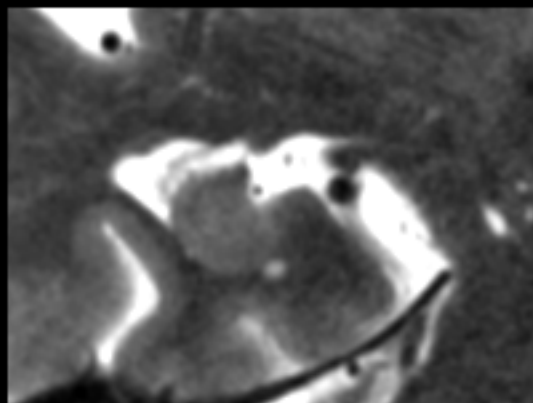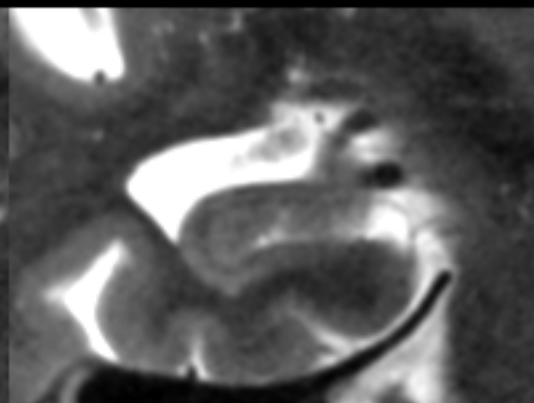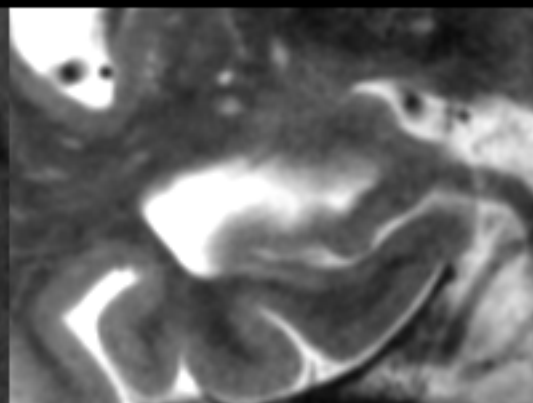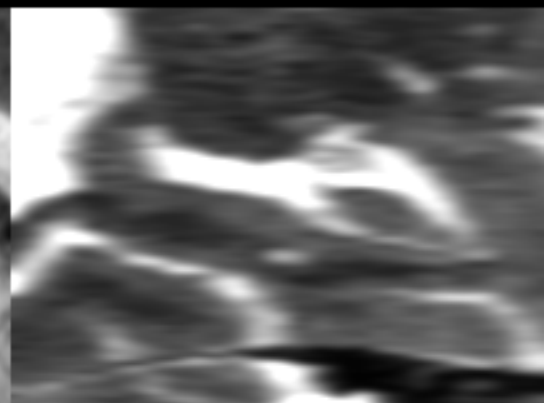

hippunfoldT1

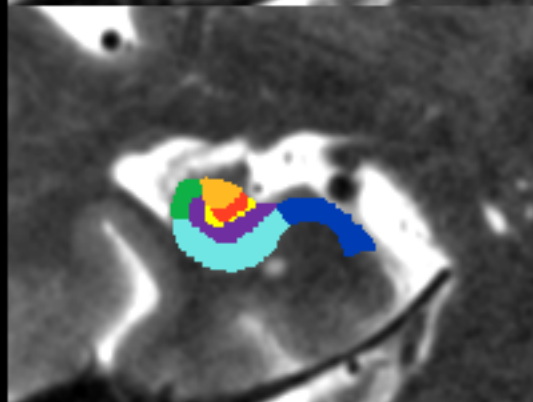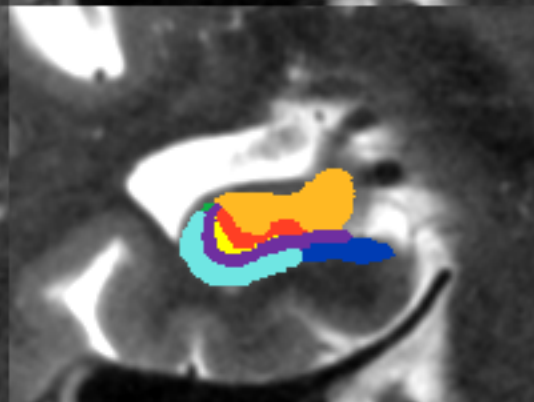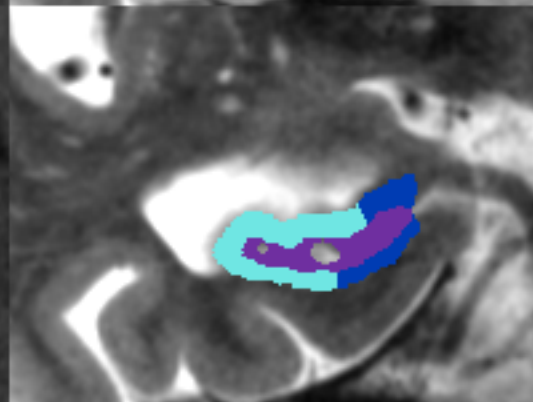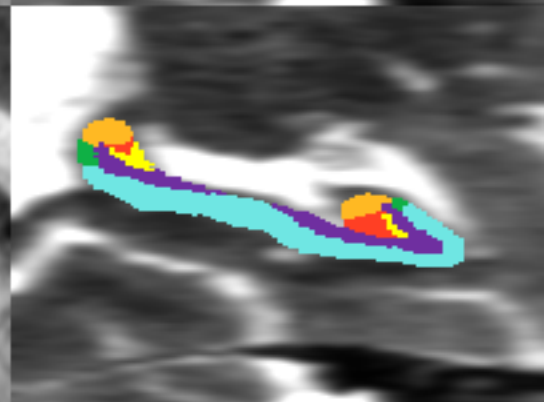

ashs

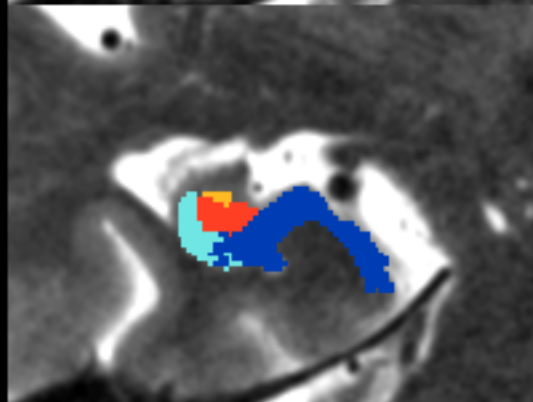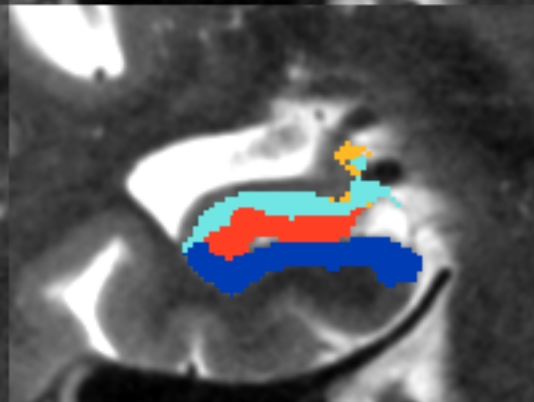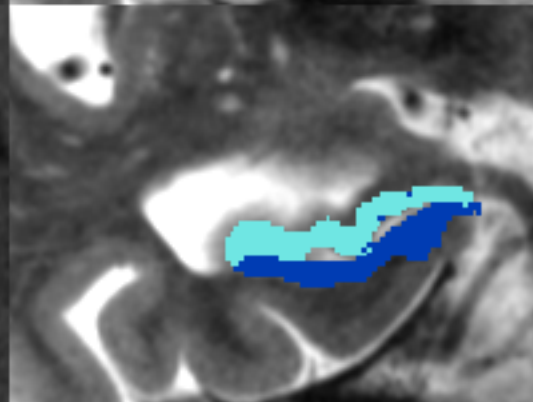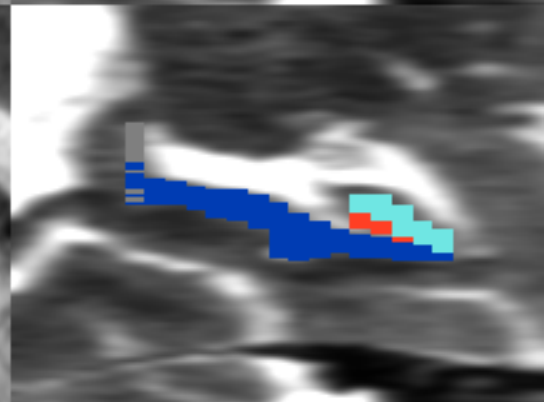

freesurfer

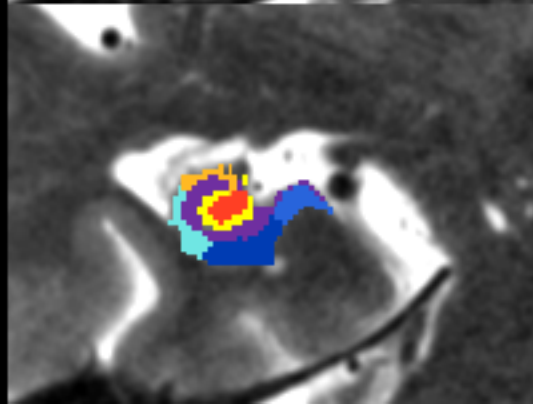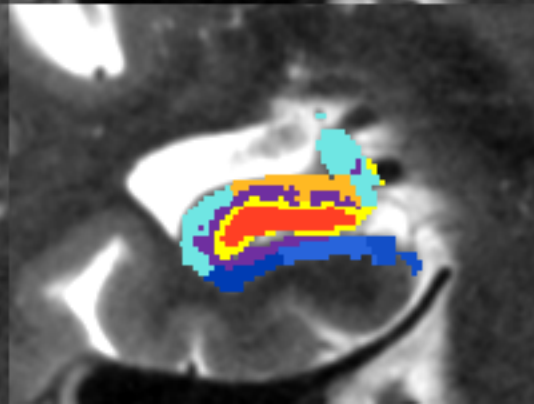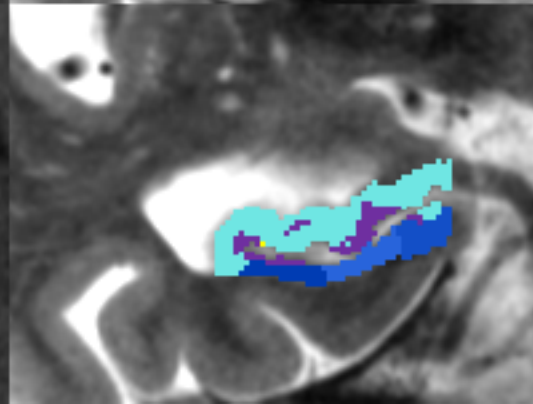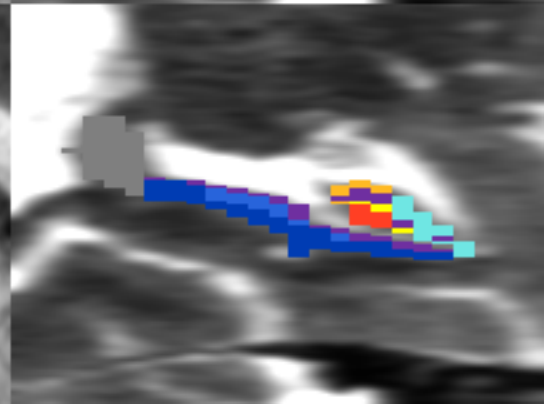

hemi=R,subject=9573597

MRI

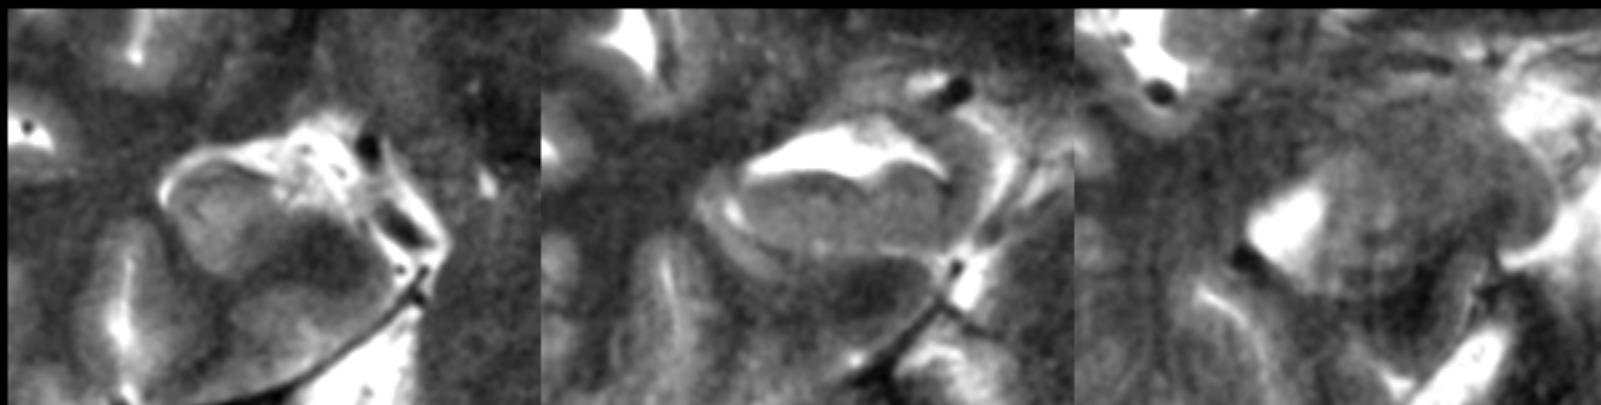

hippunfoldT1

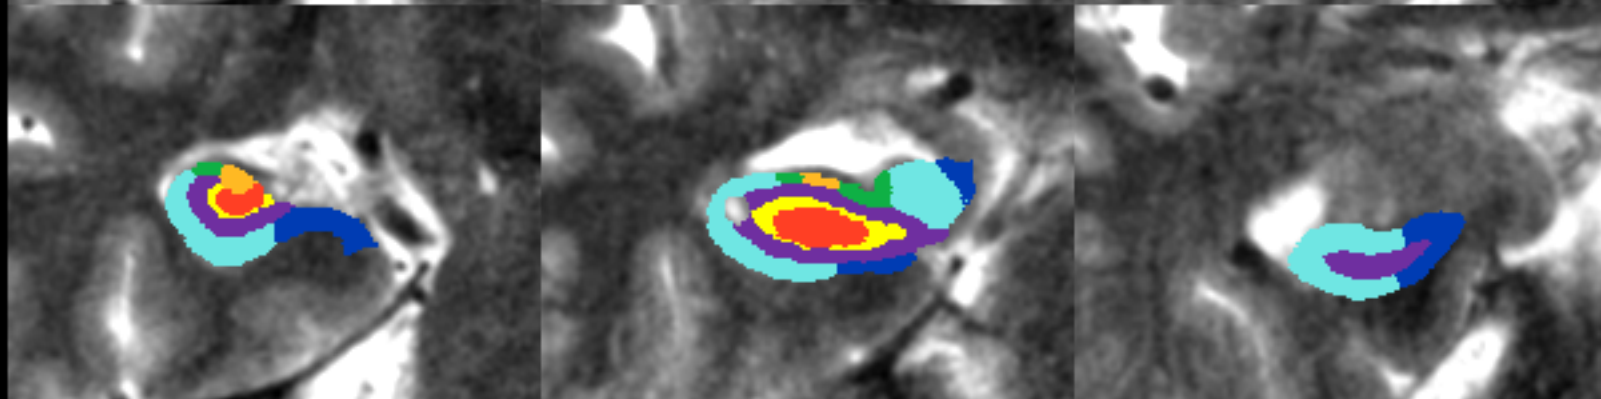

ashs

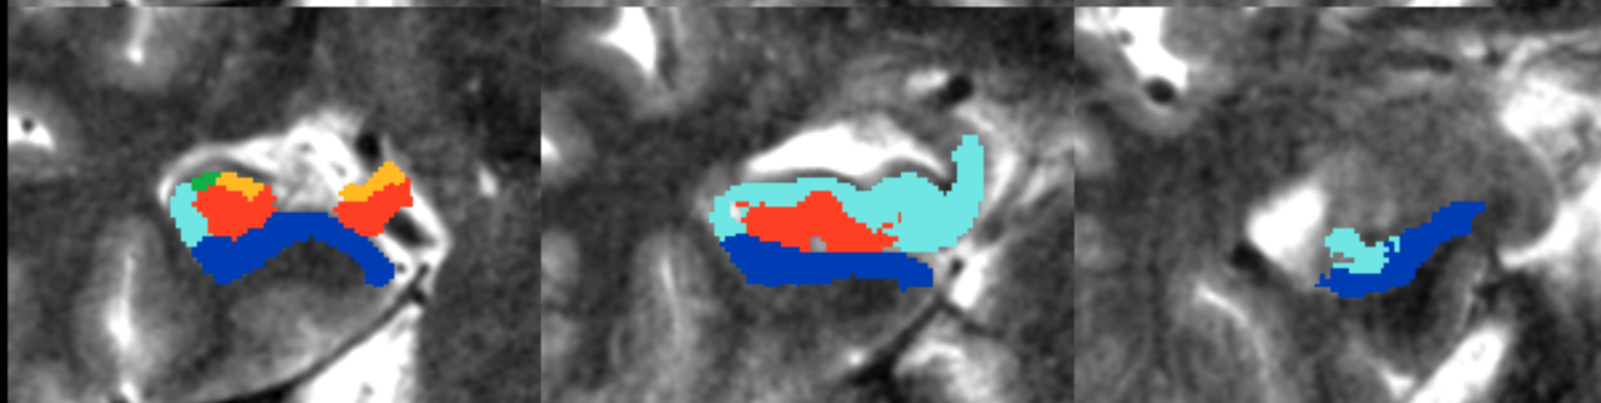

freesurfer

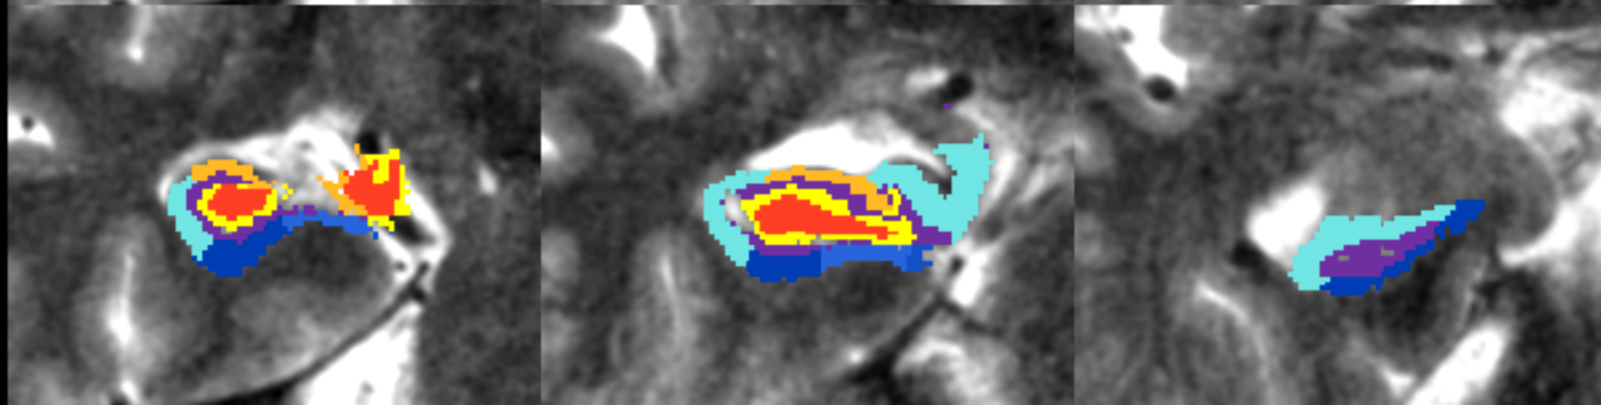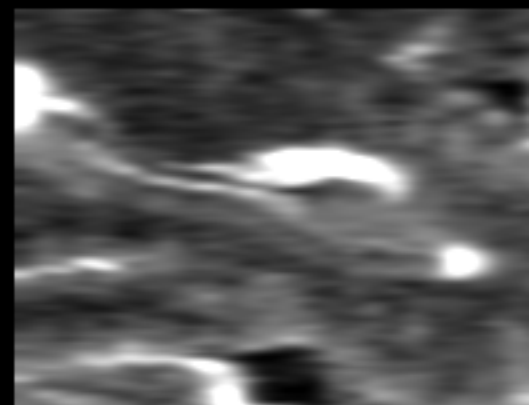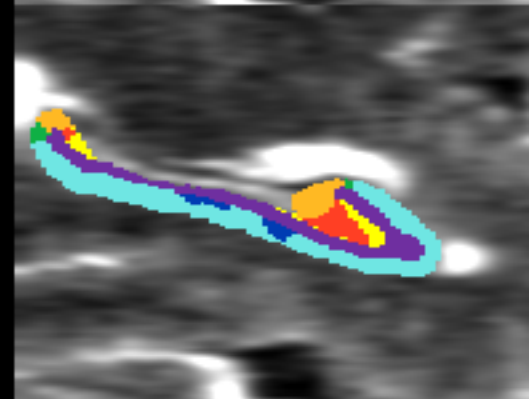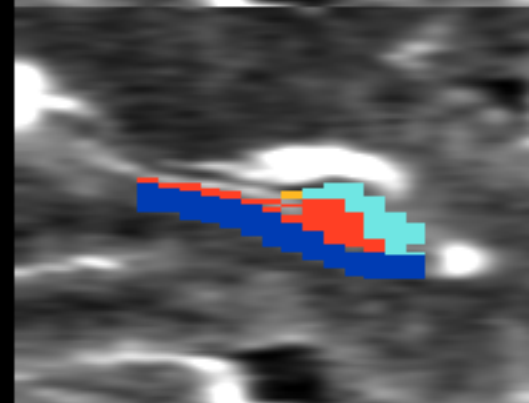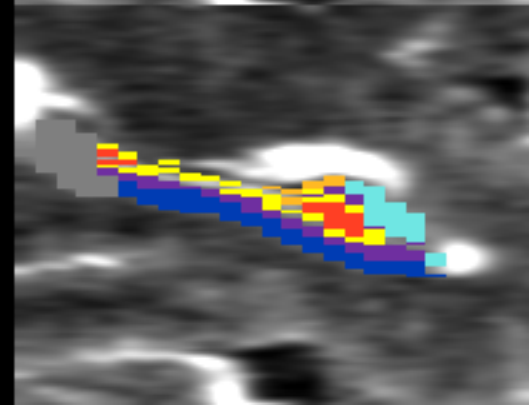

hemi=R,subject=9578406

MRI

hippunfoldT1

ashs

freesurfer

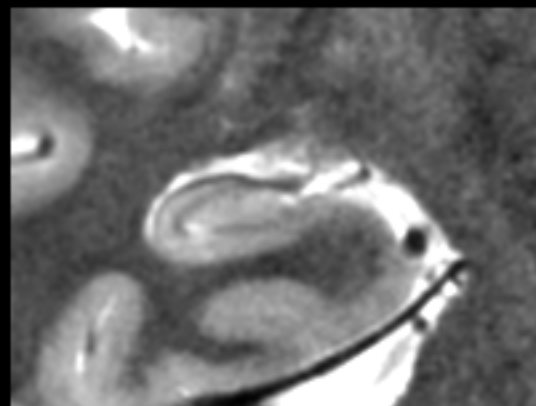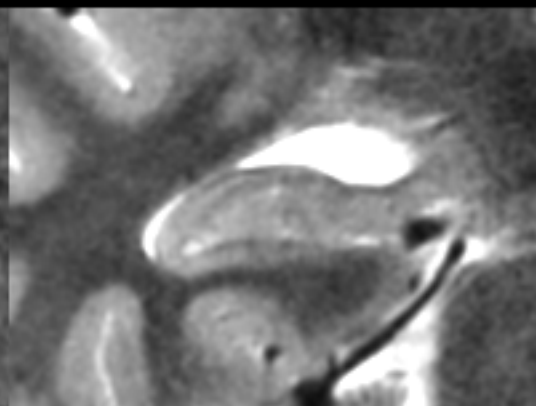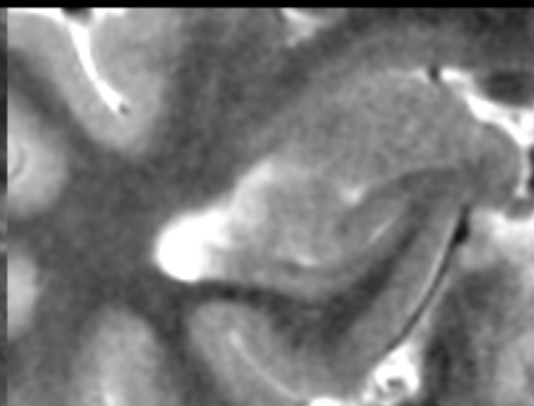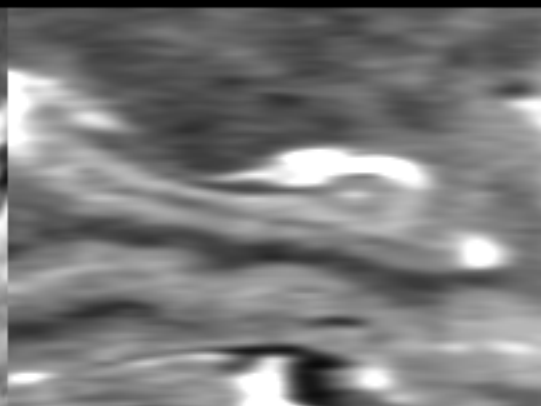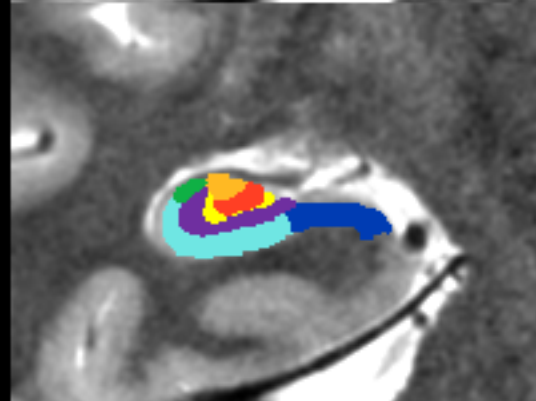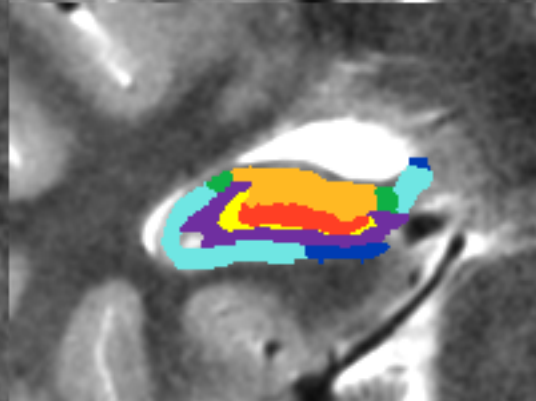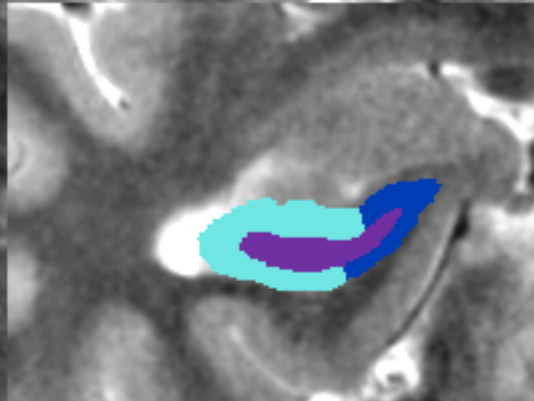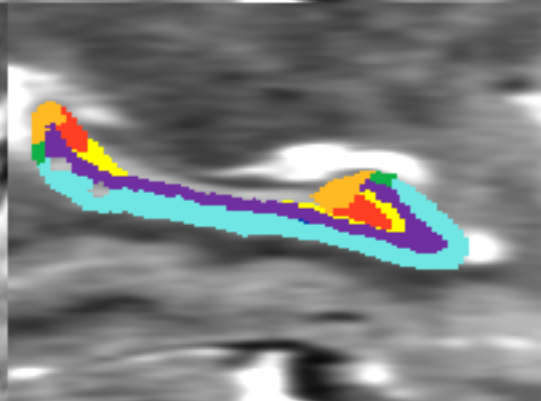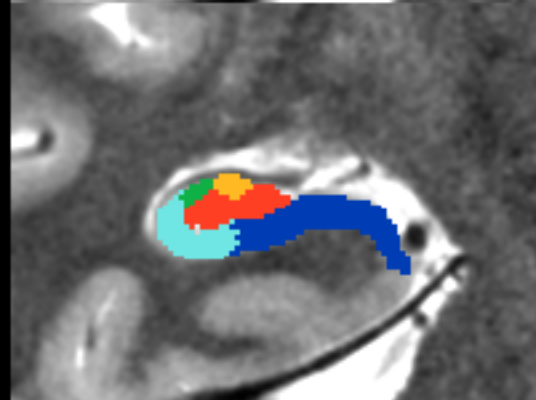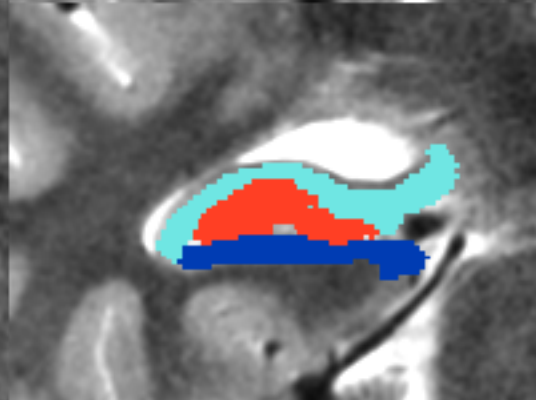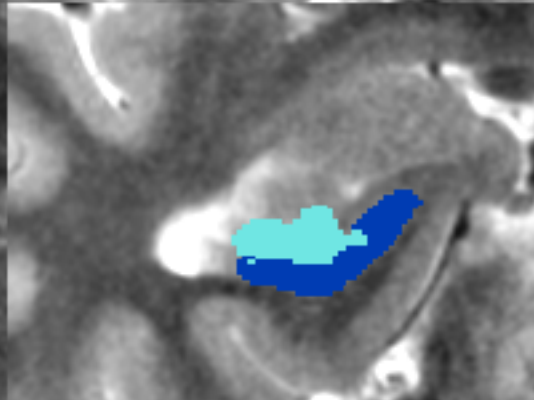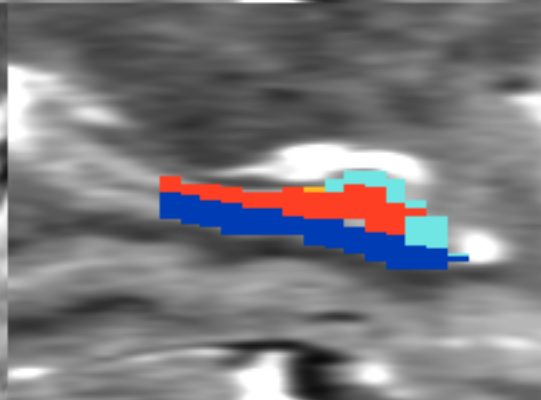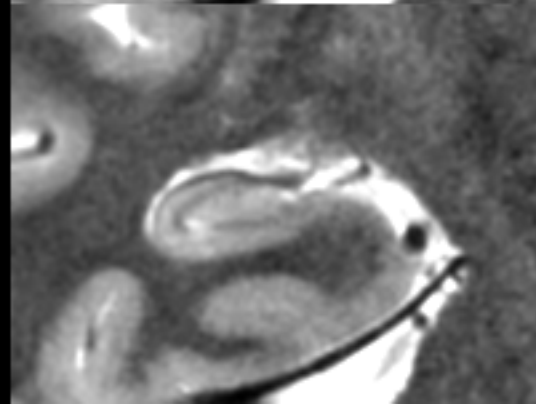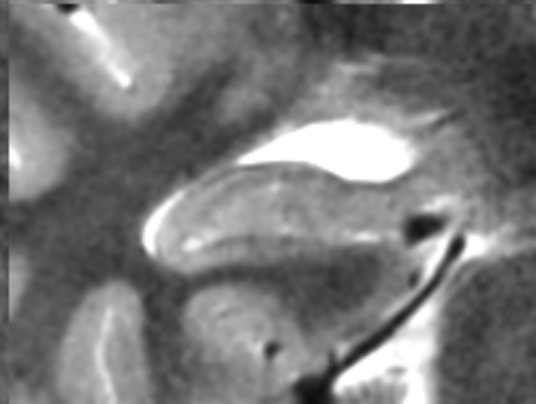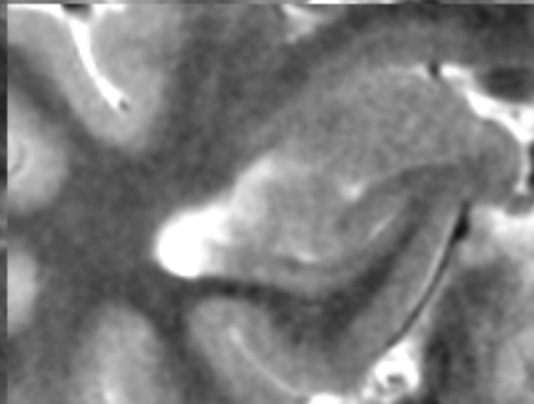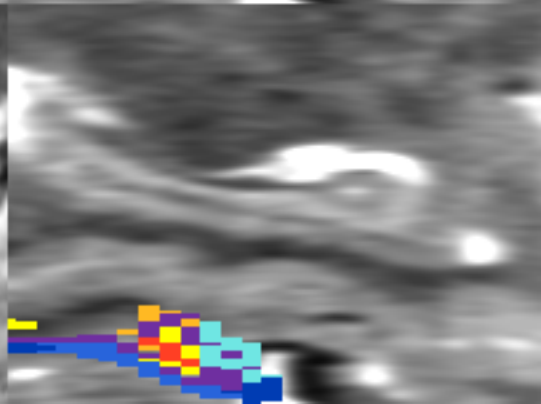



hemi=R,subject=9589815

MRI

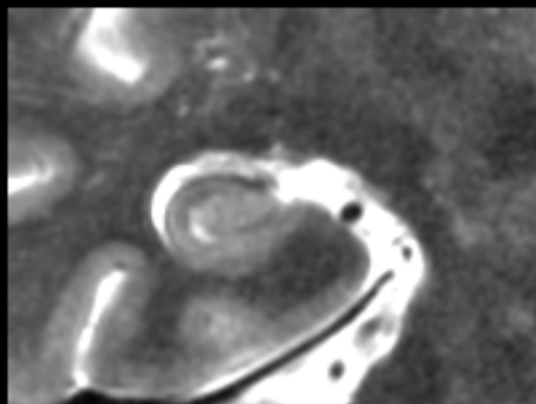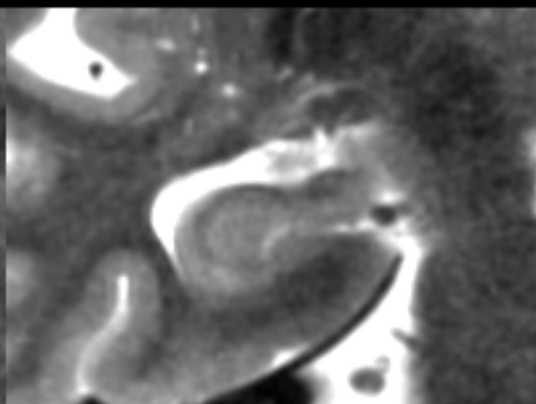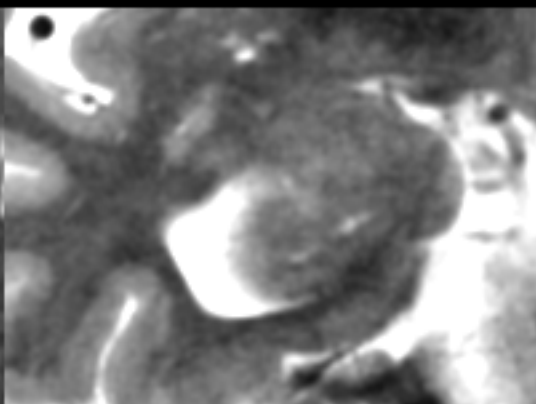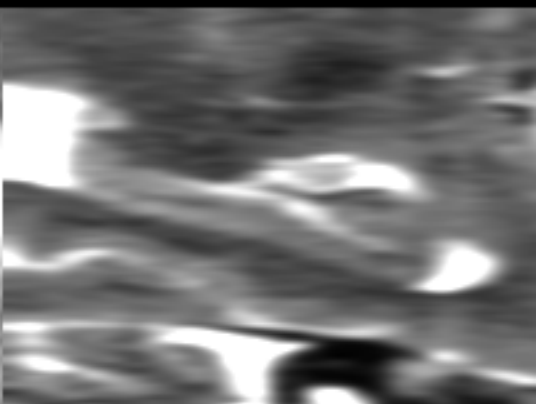

hippunfoldT1

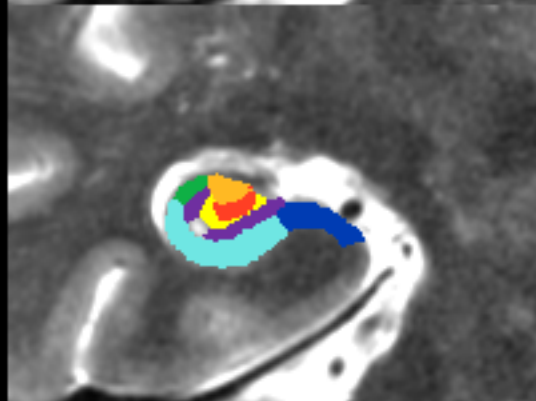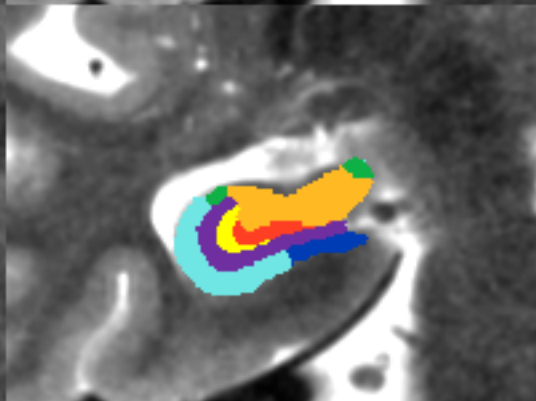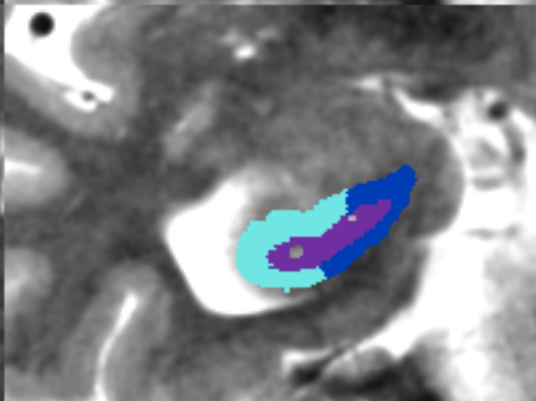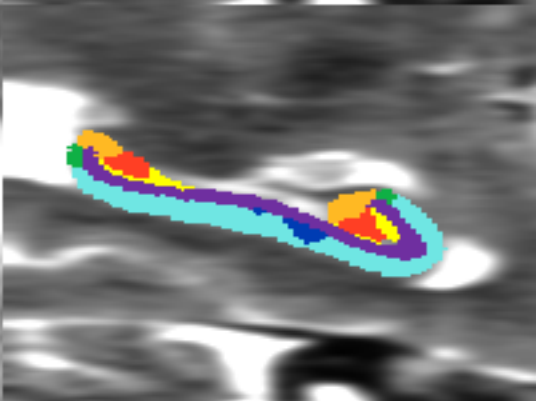

ashs

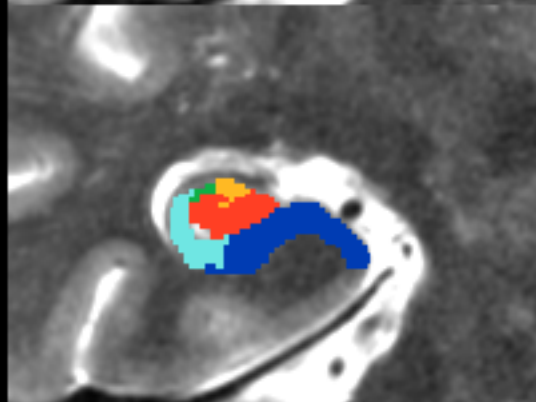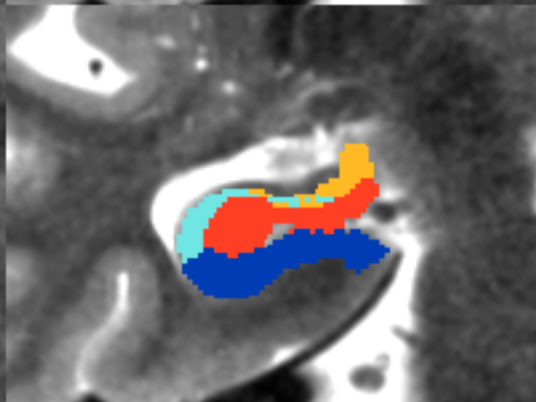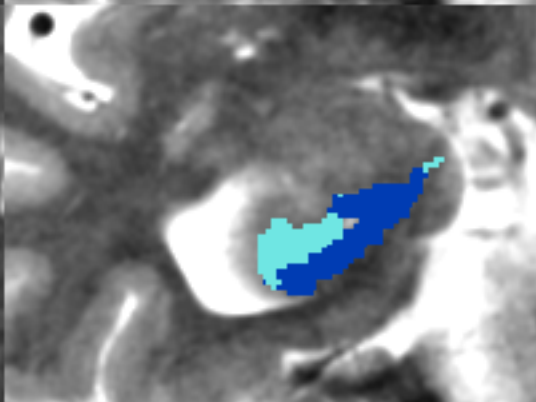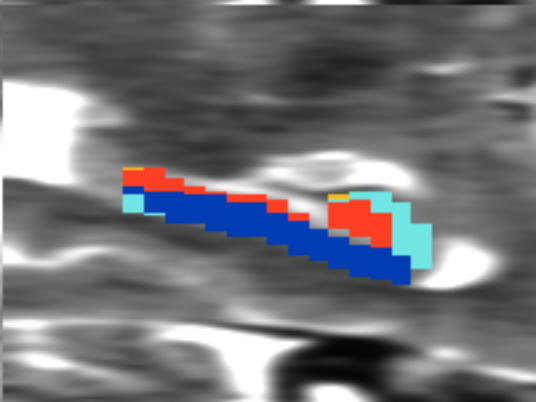

freesurfer

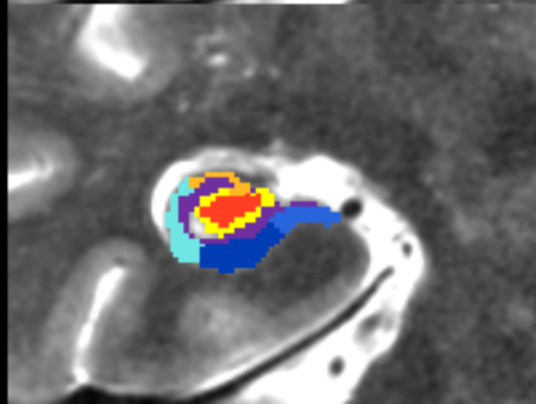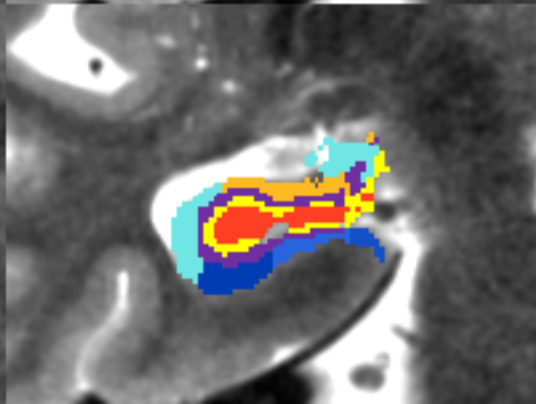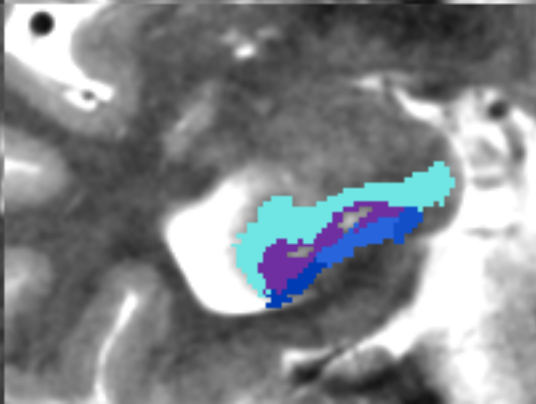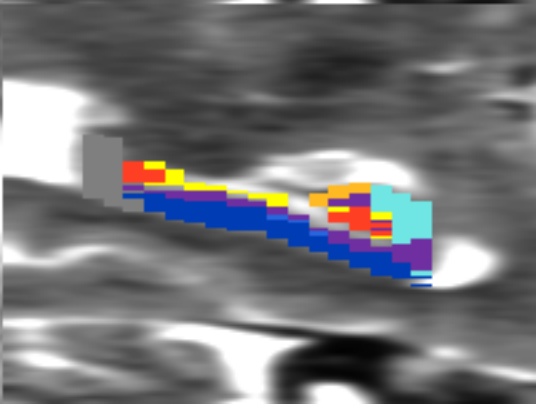

hemi=R,subject=9646699

MRI

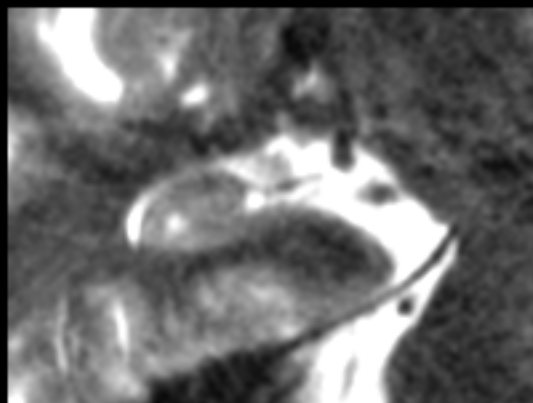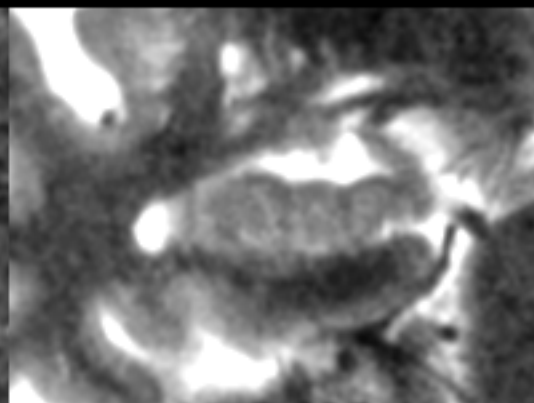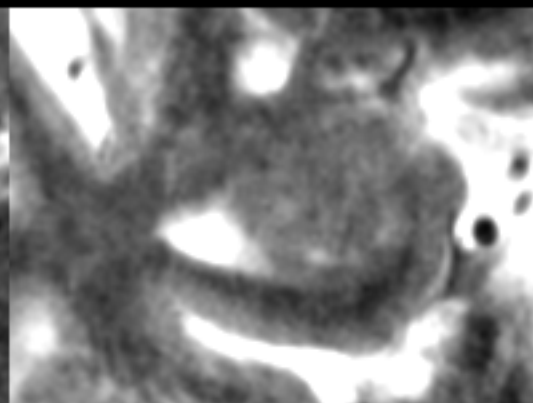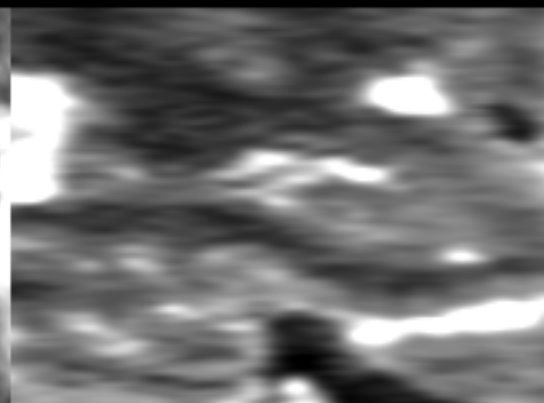

hippunfoldT1

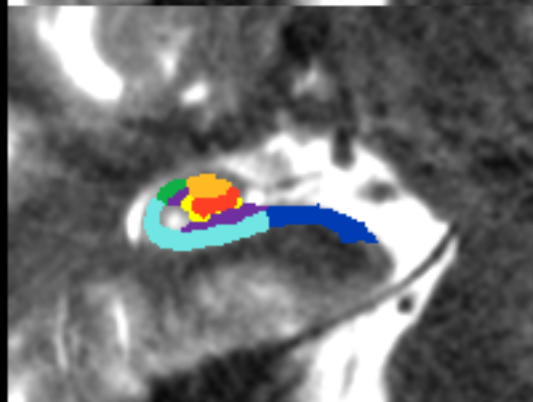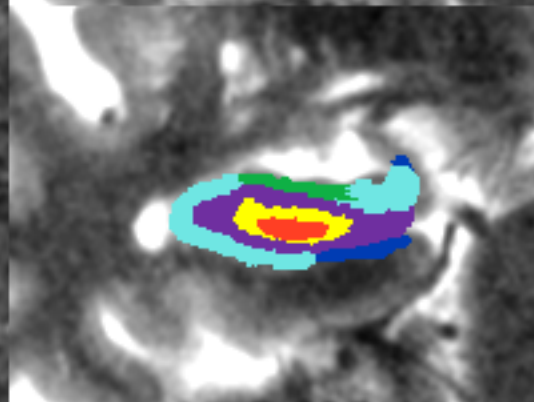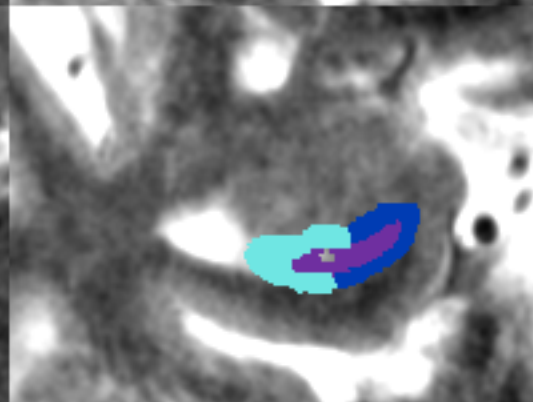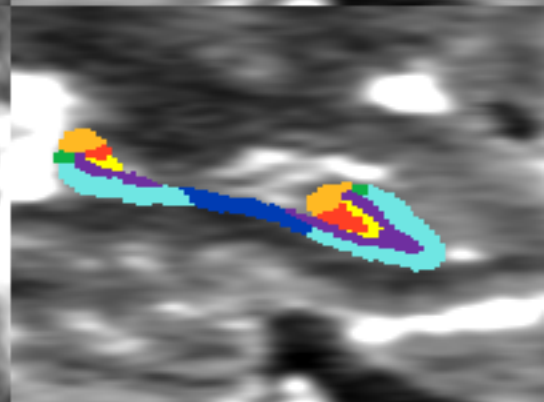

ashs

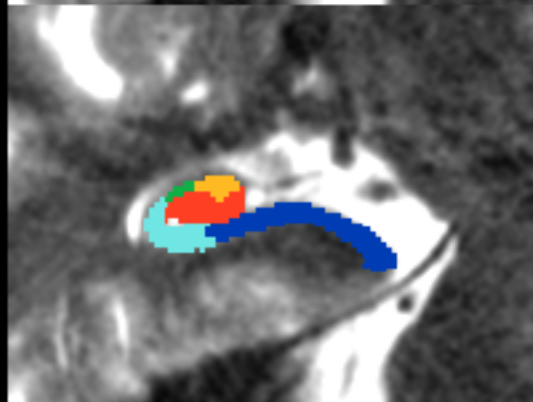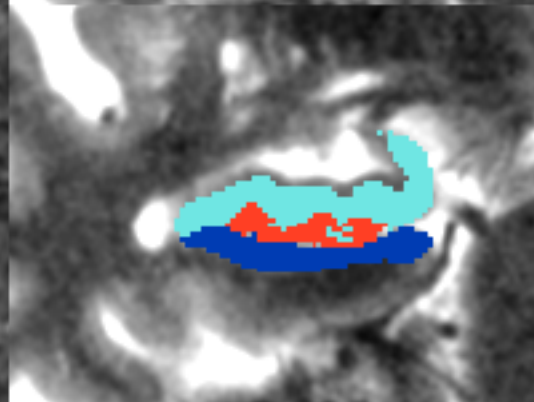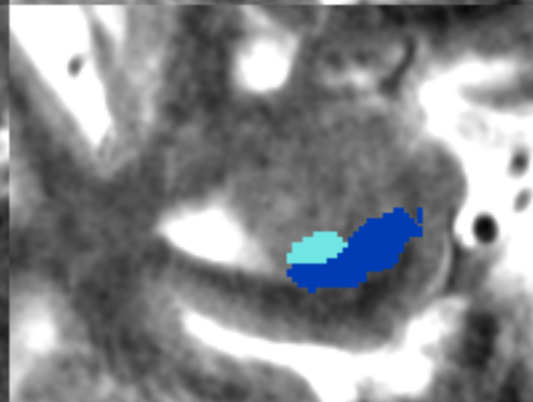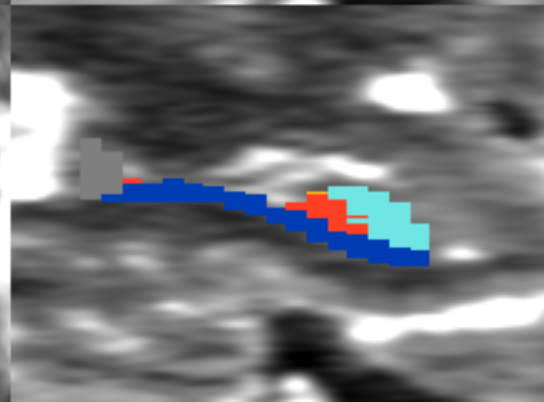

freesurfer

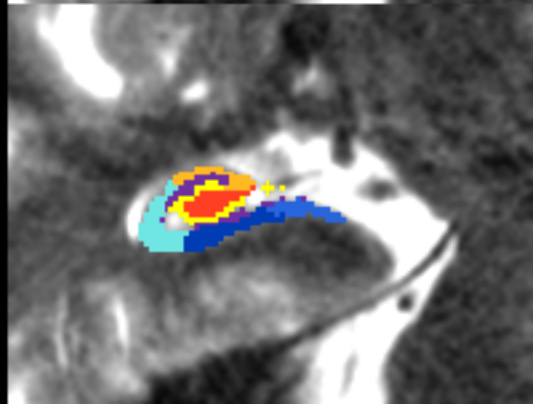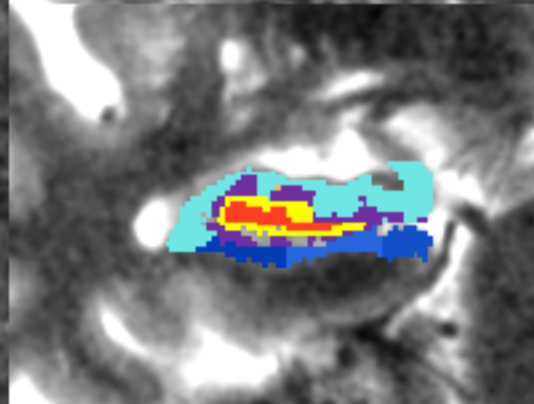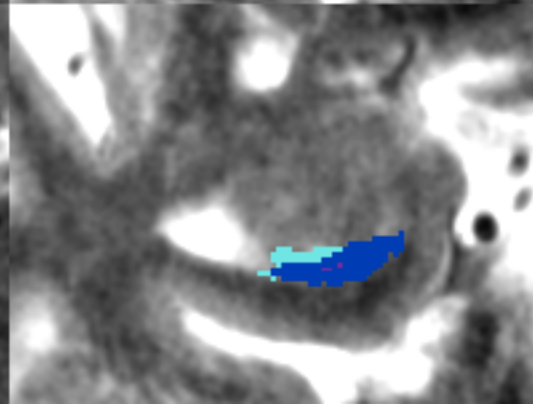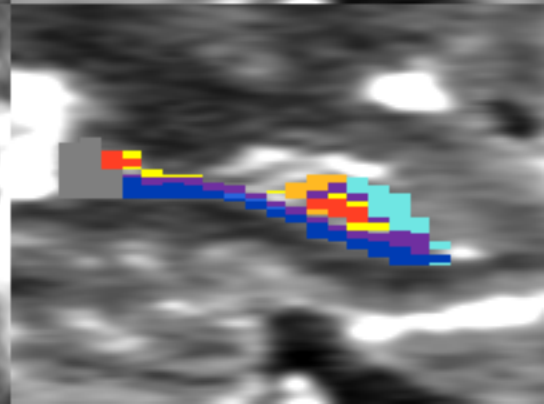

hemi=R,subject=9686611

MRI

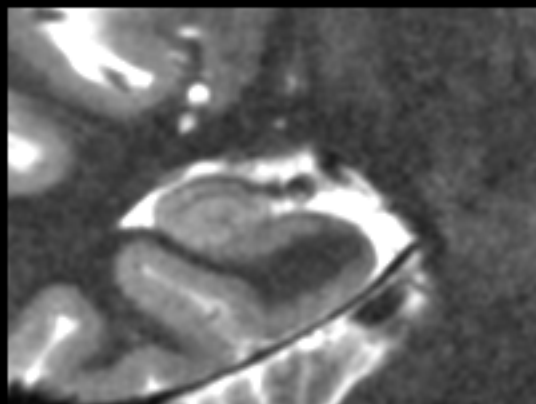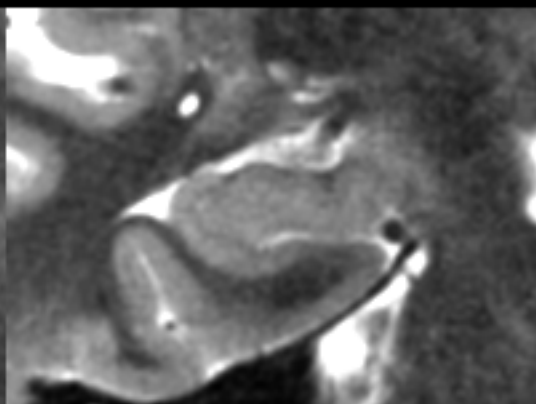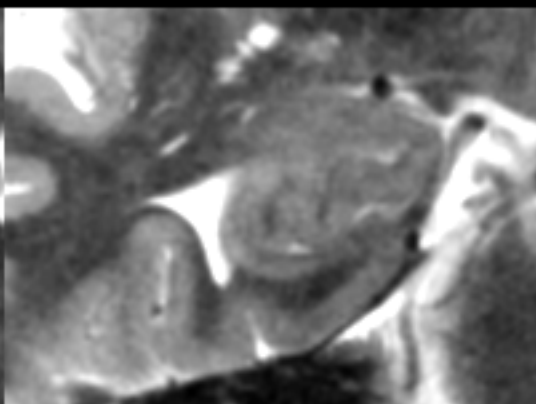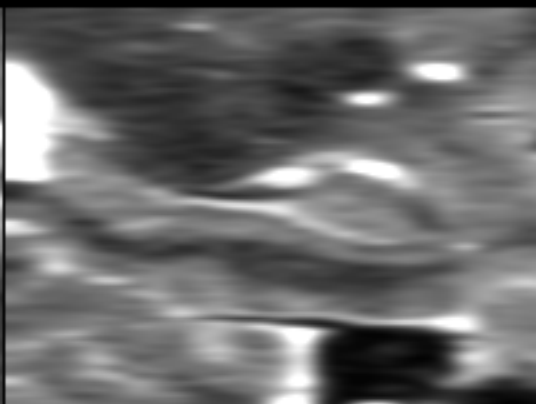

hippunfoldT1

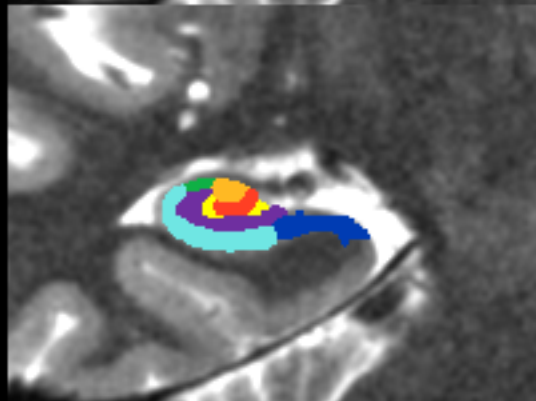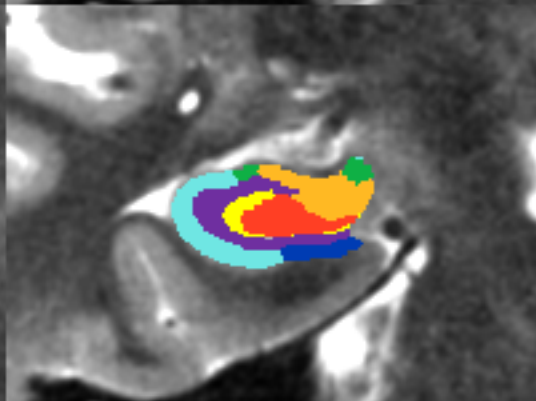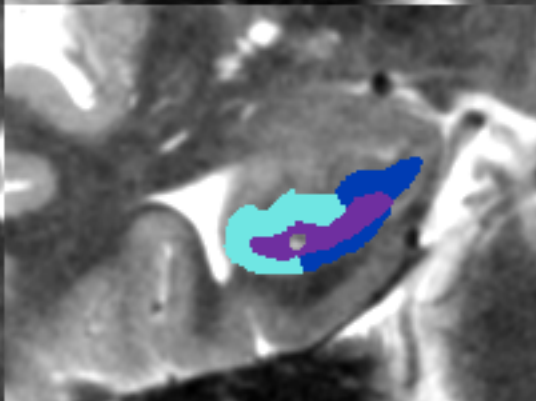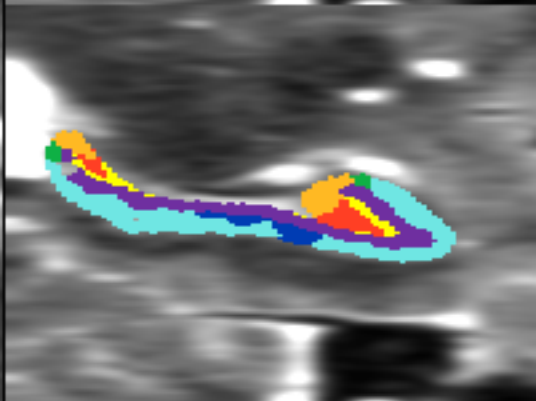

ashs

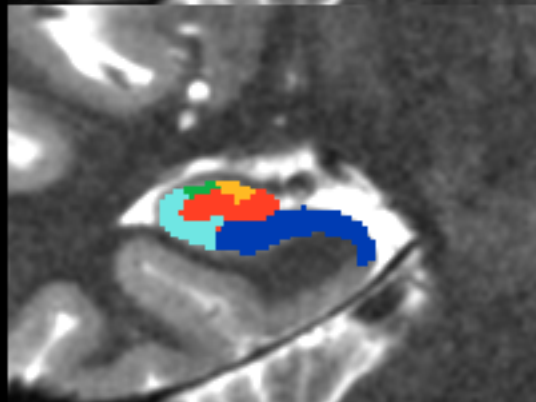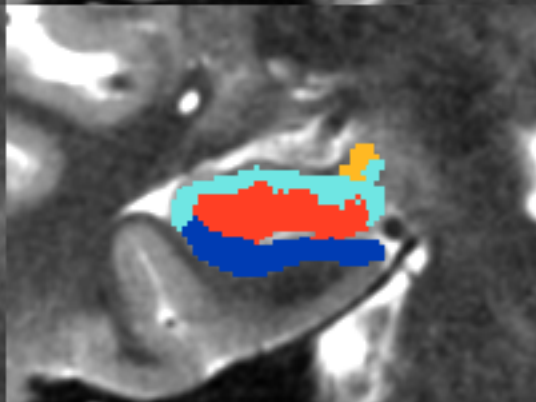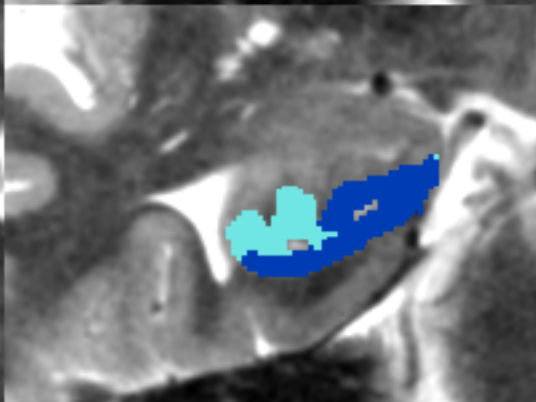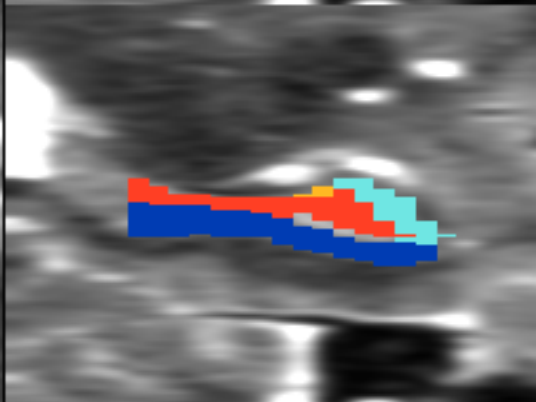

freesurfer

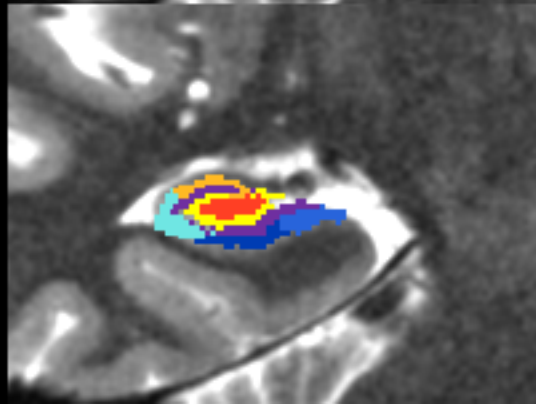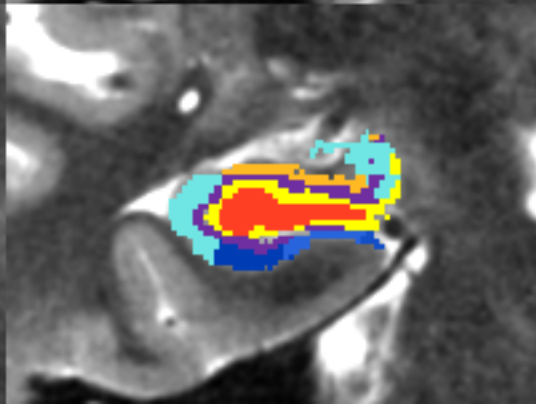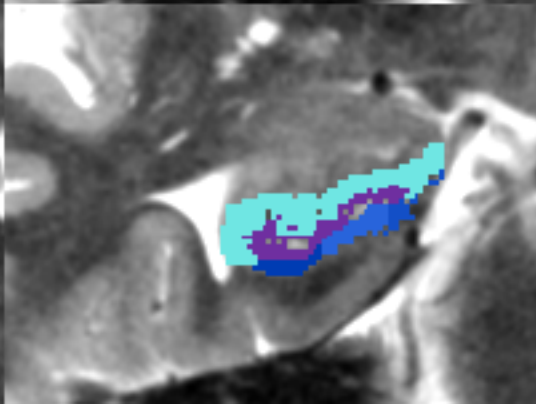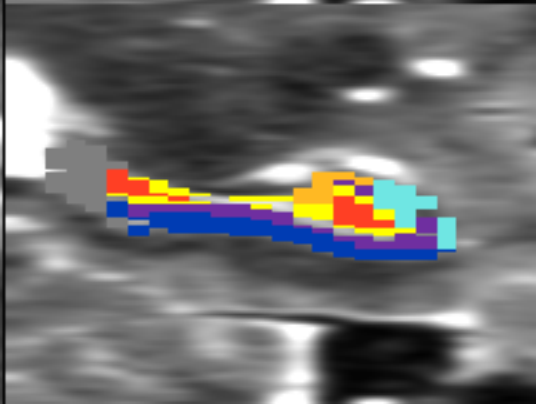

hemi=R,subject=9688312

MRI

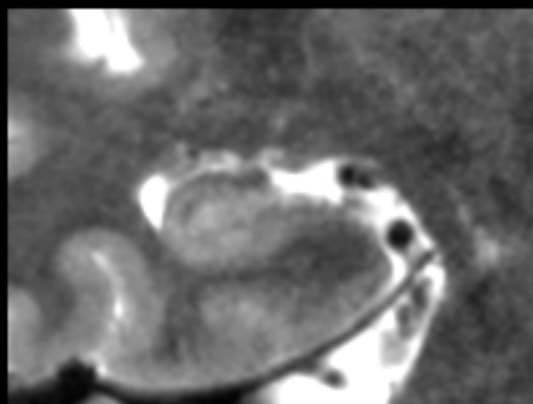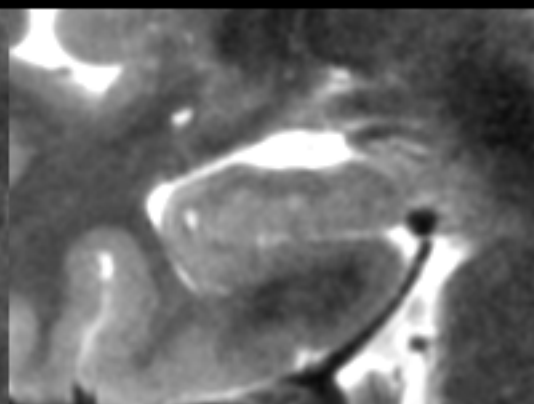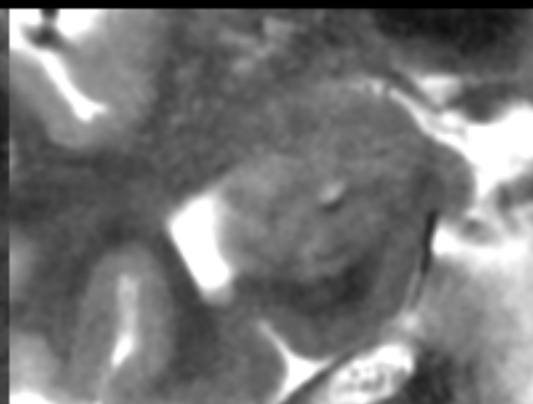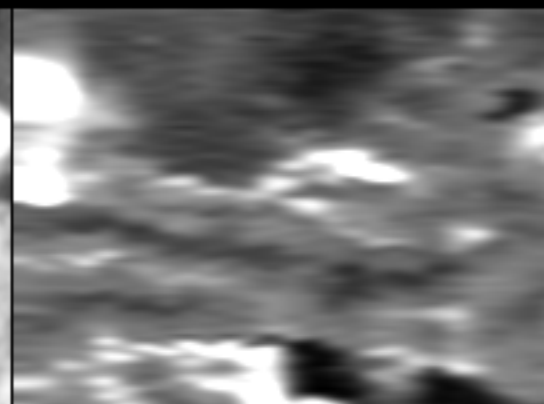

hippunfoldT1

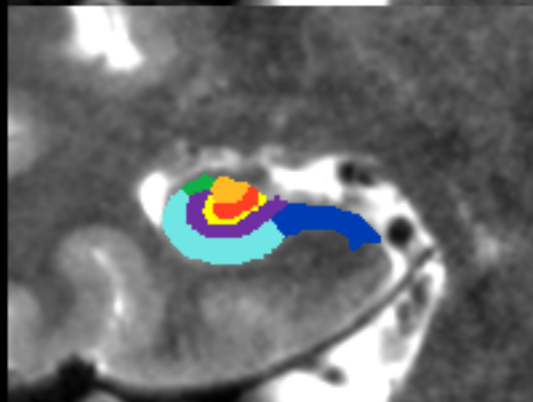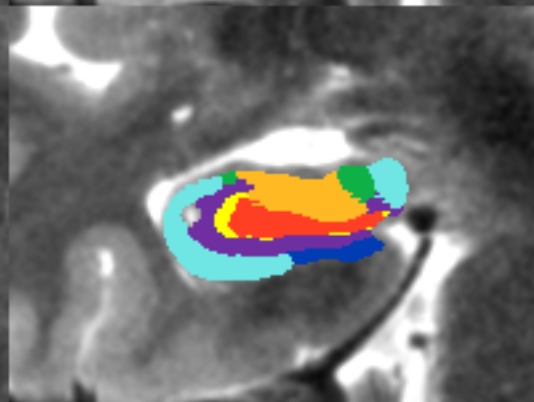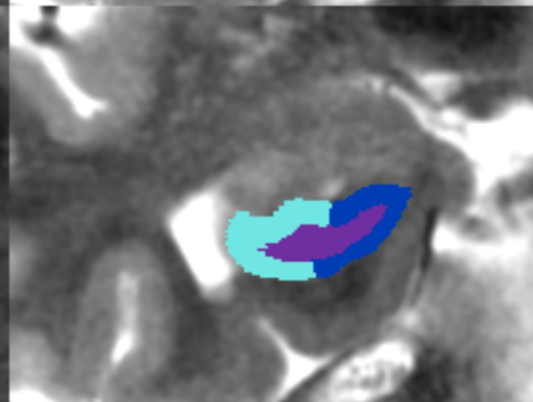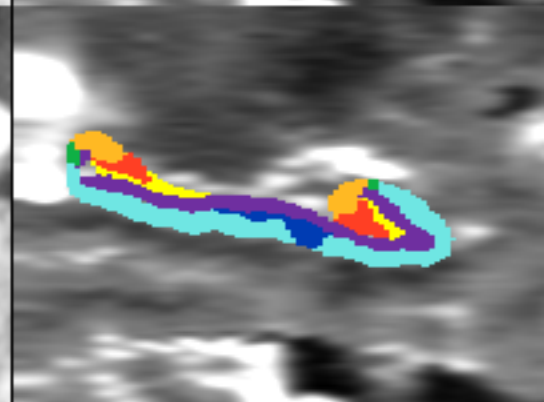

ashs

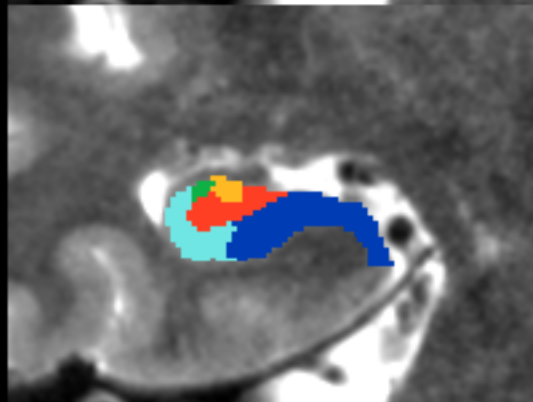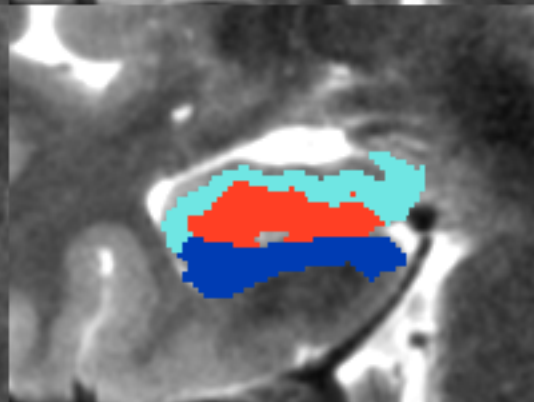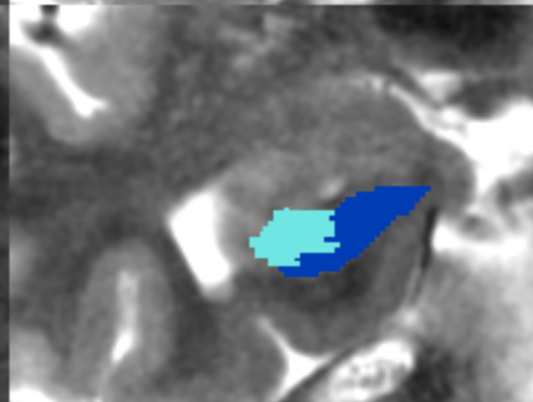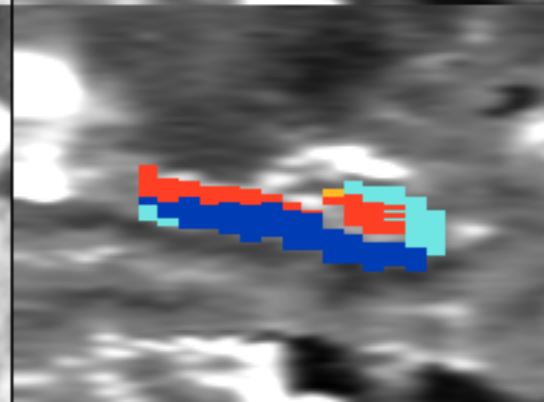

freesurfer

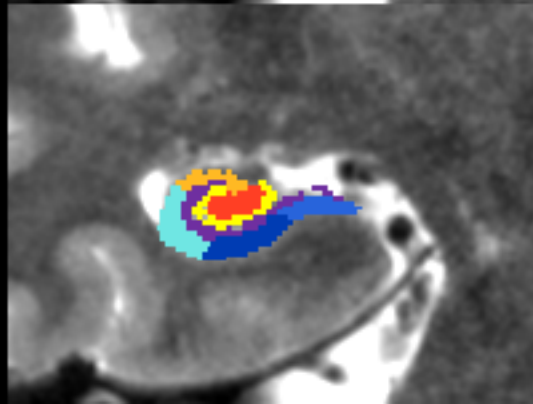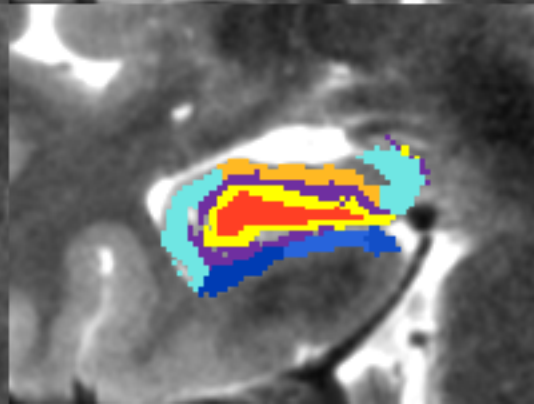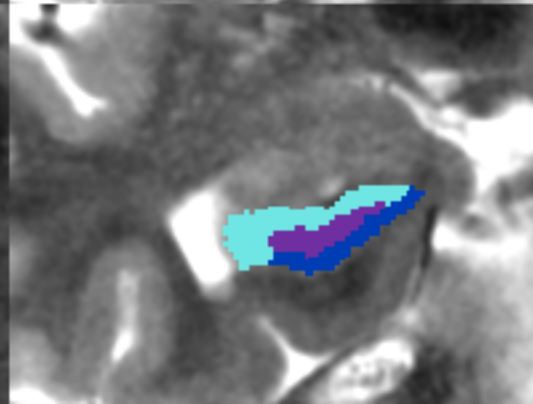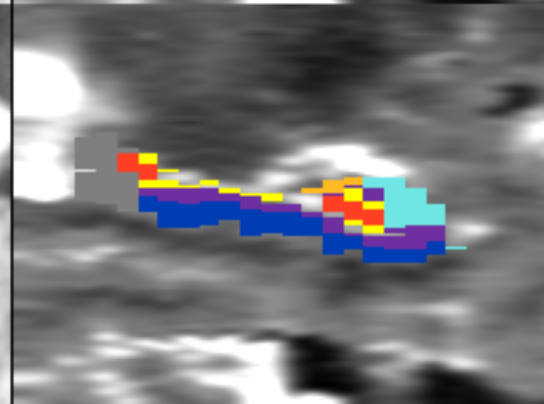

hemi=R,subject=9717999

MRI

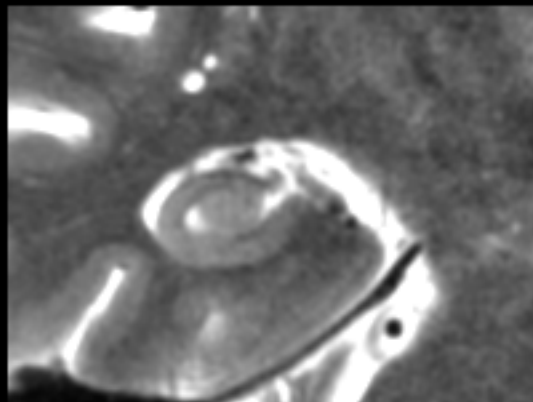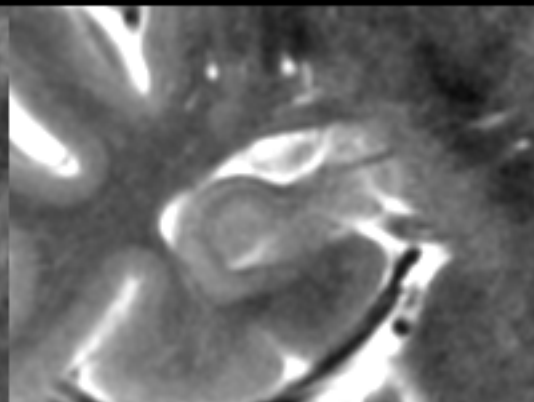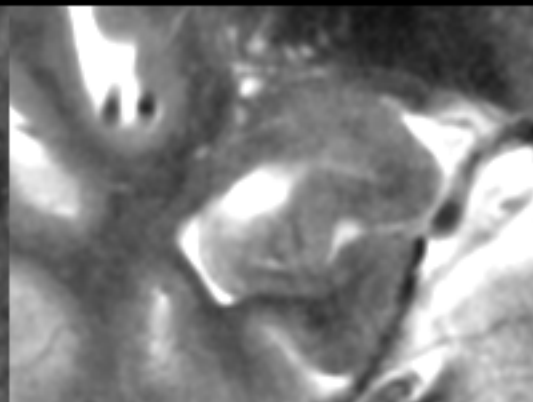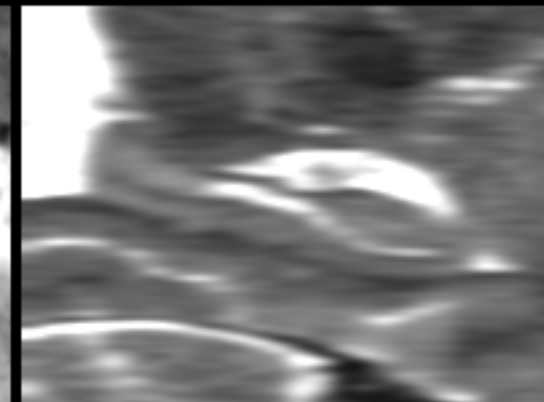

hippunfoldT1

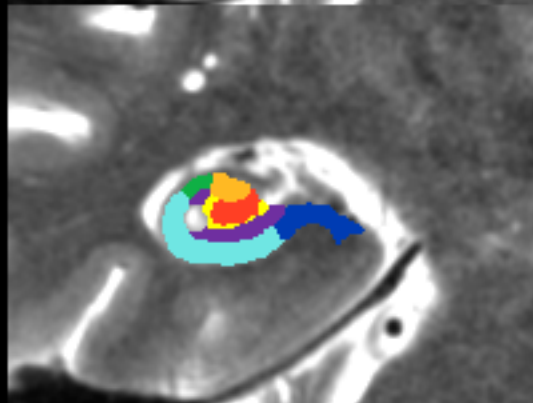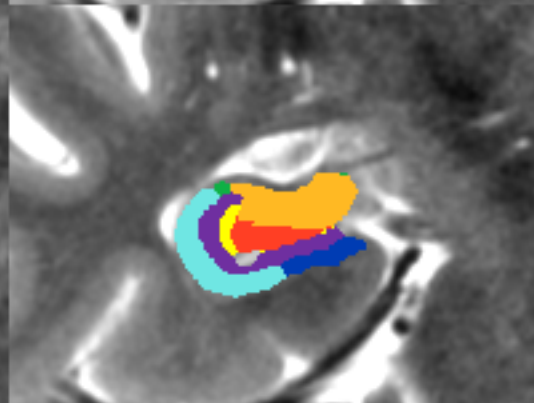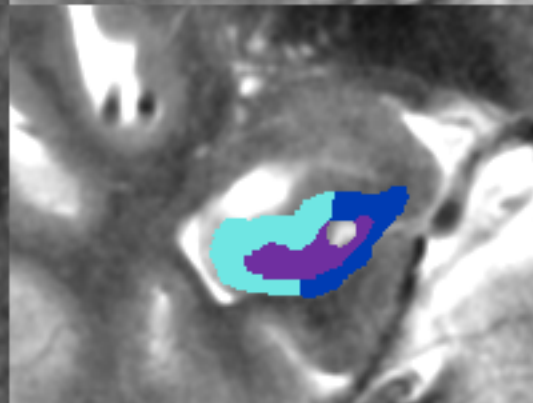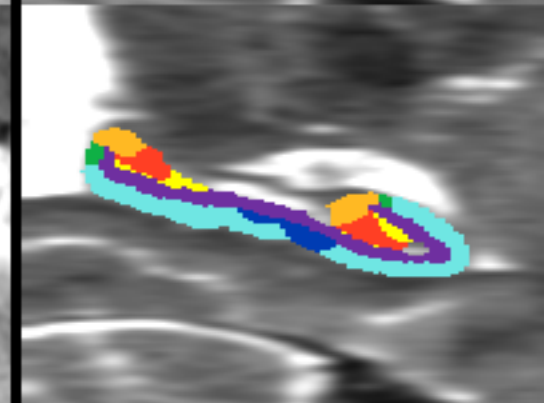

ashs

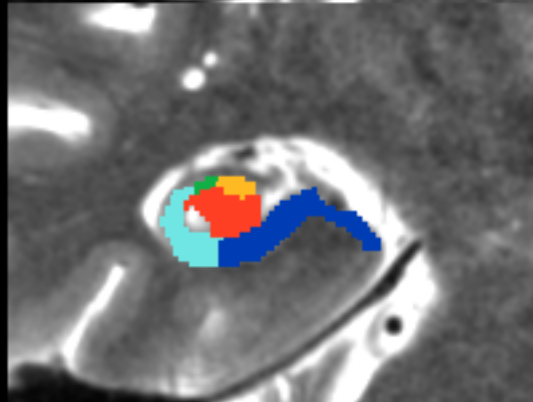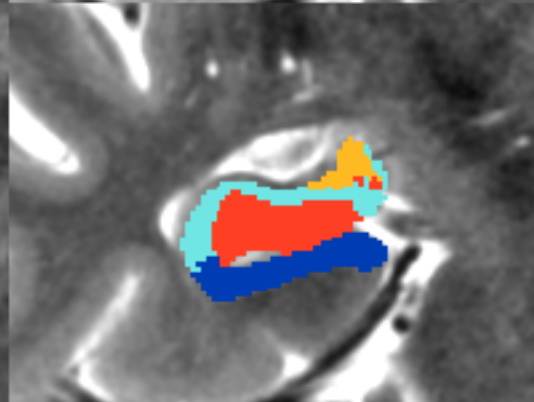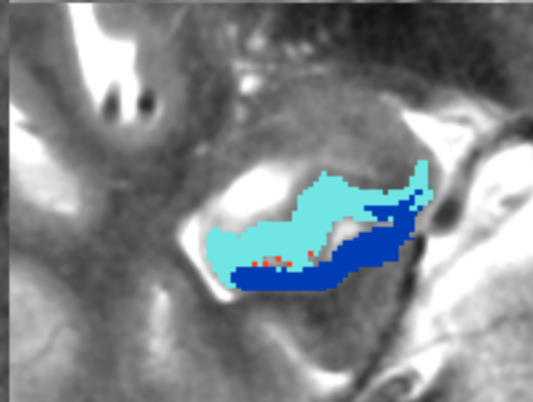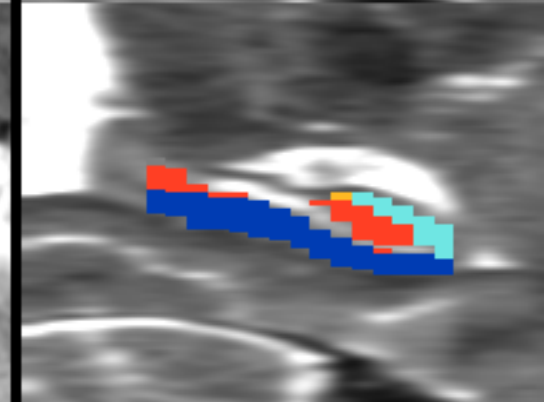

freesurfer

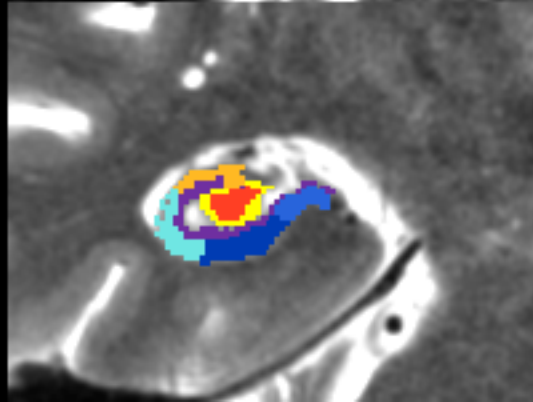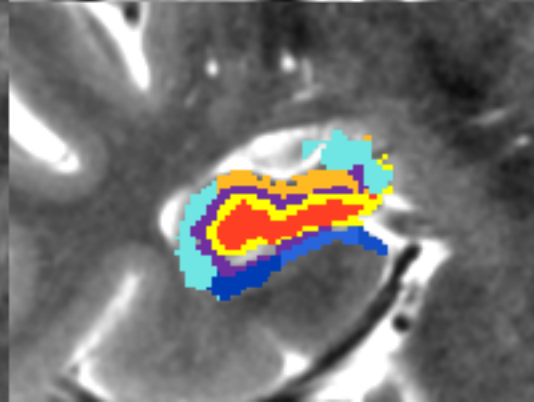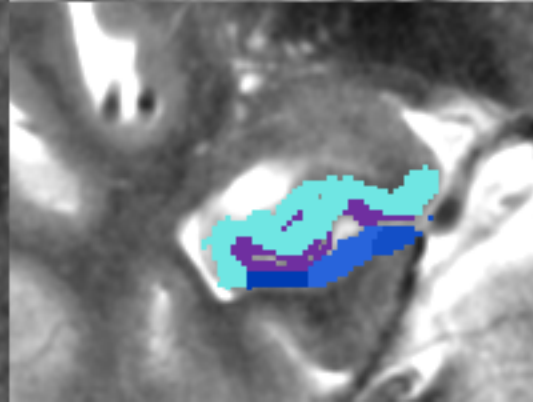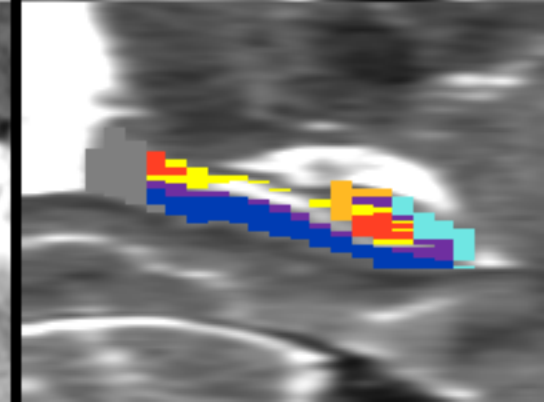

hemi=R,subject=9745500

MRI

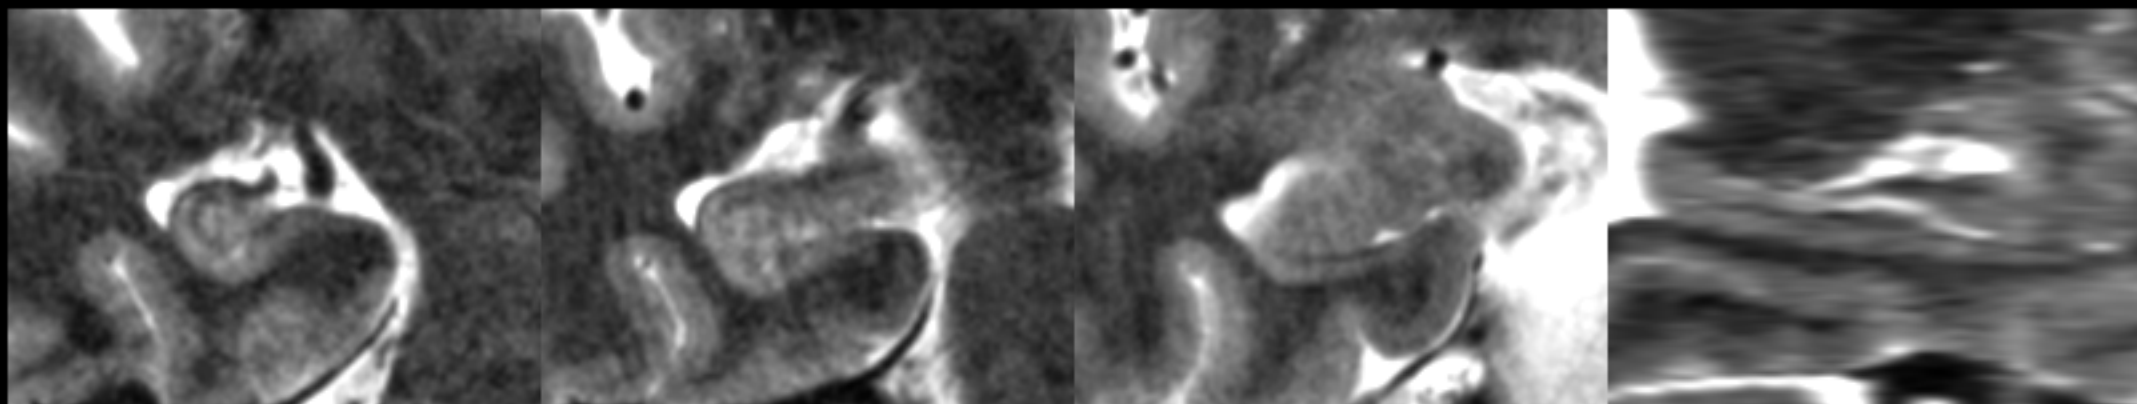

hippunfoldT1

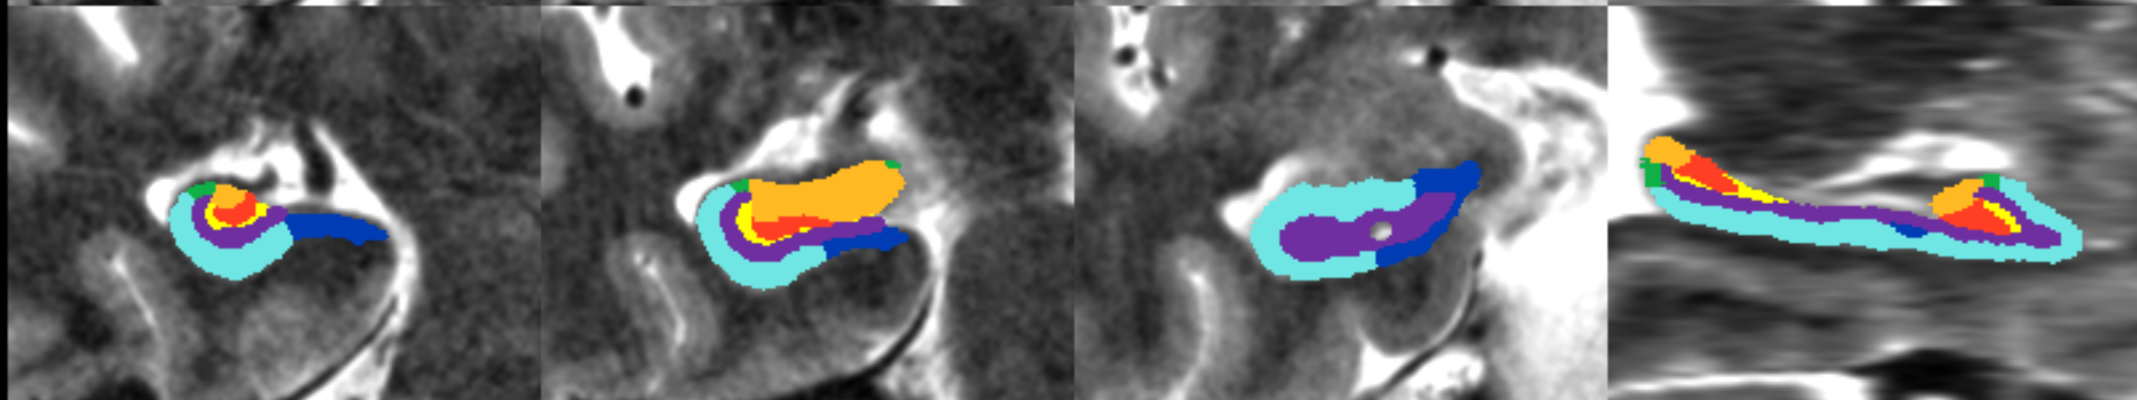

ashs

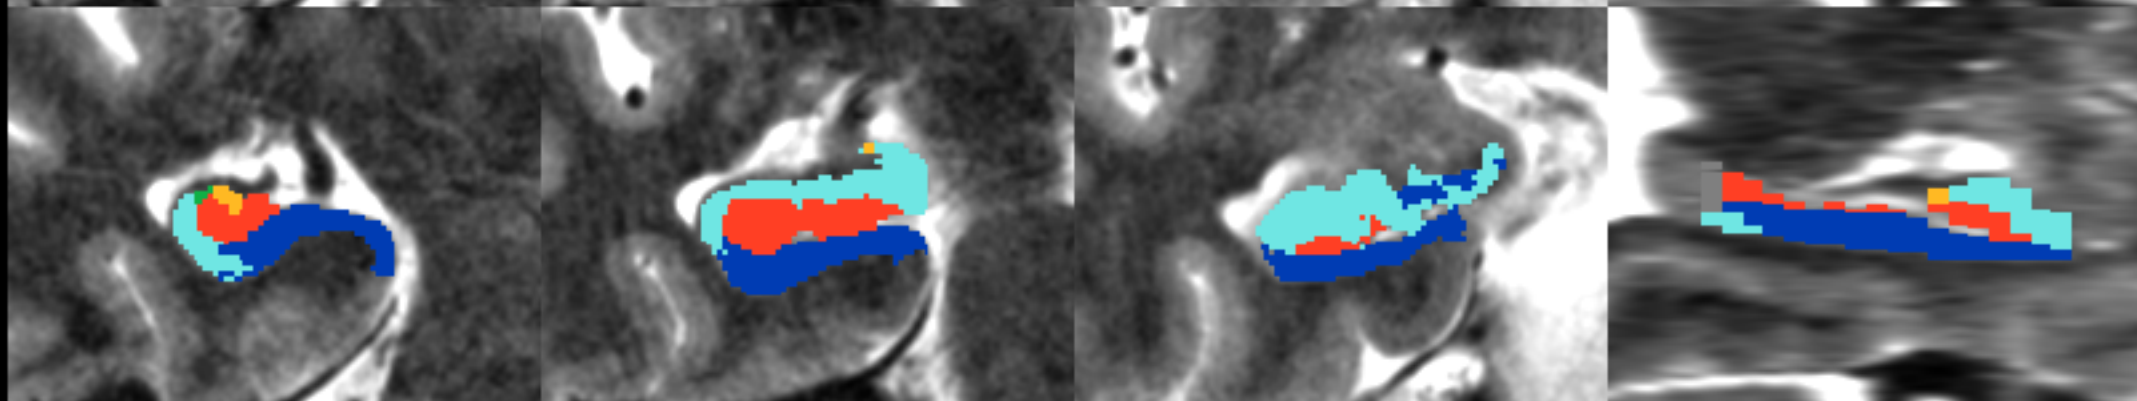

freesurfer

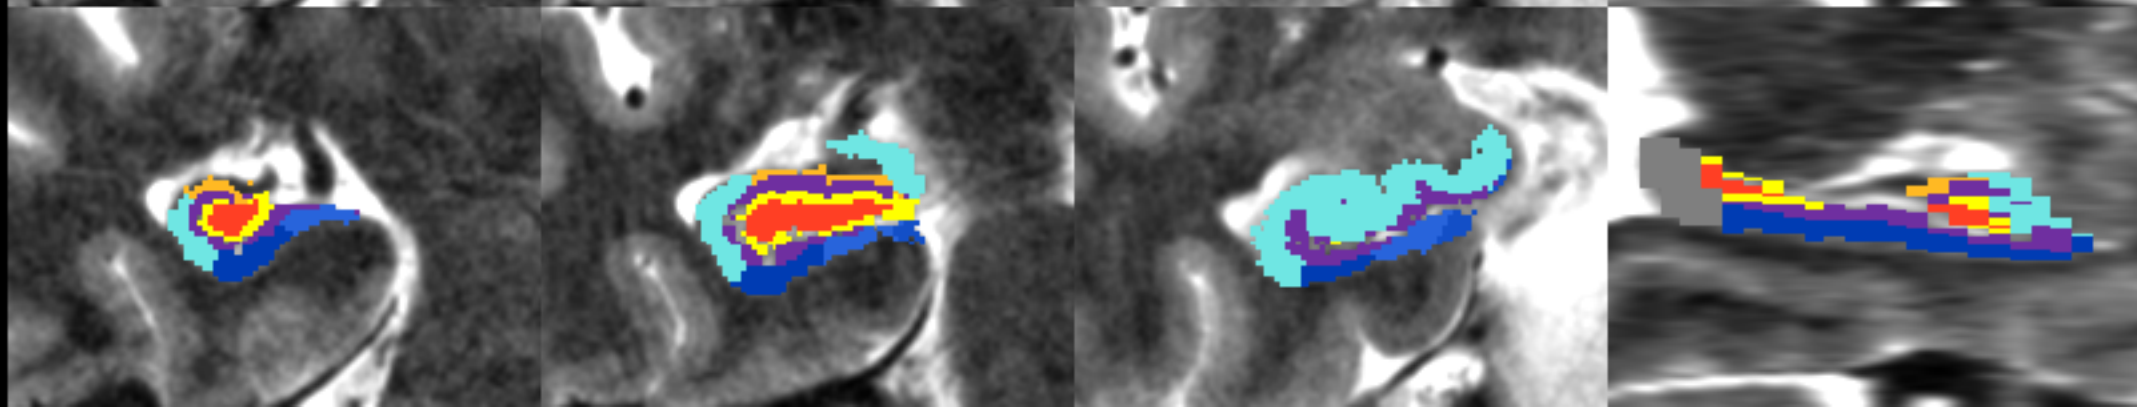

hemi=R,subject=9845403

MRI

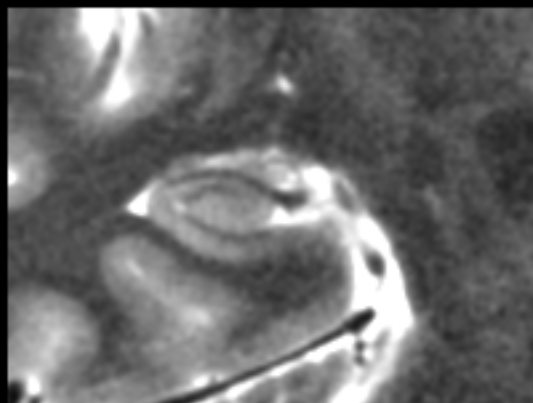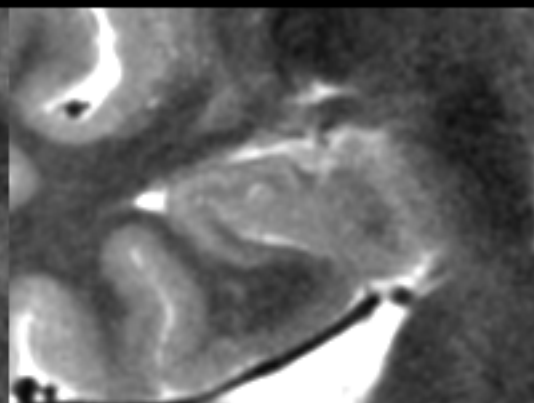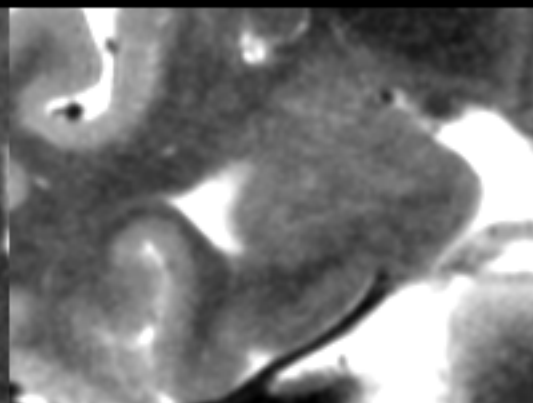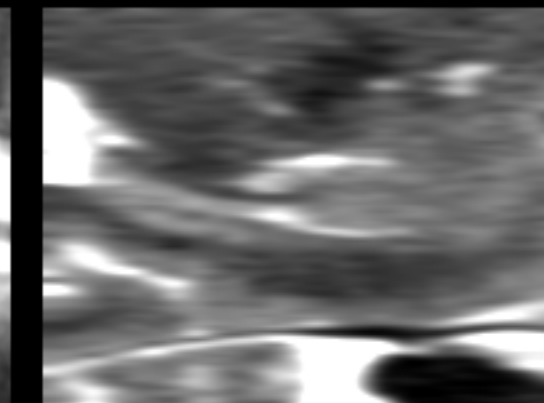

hippunfoldT1

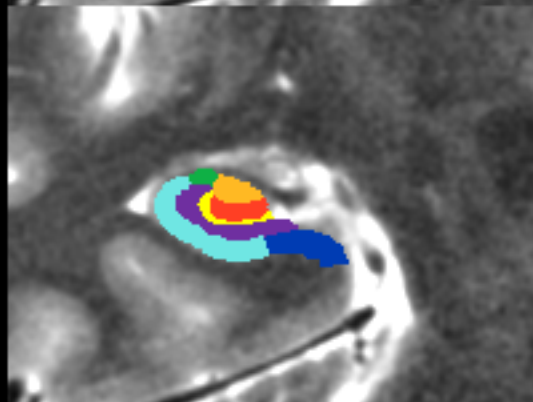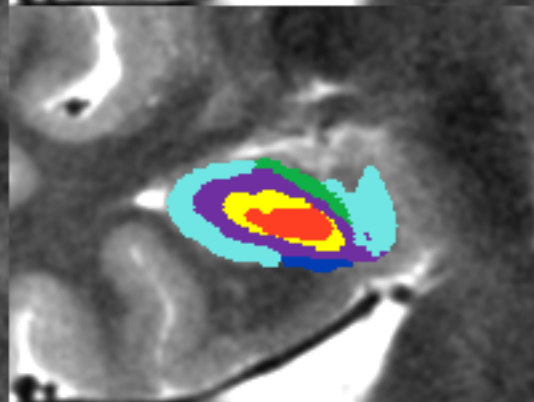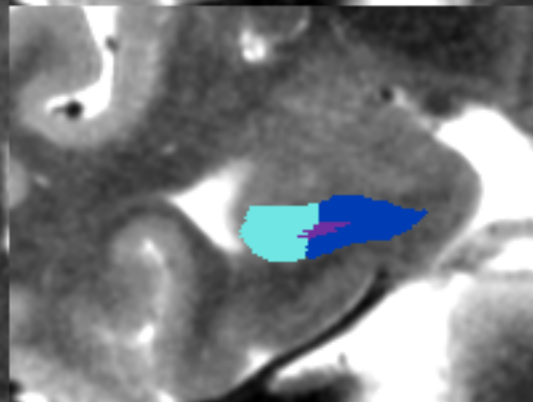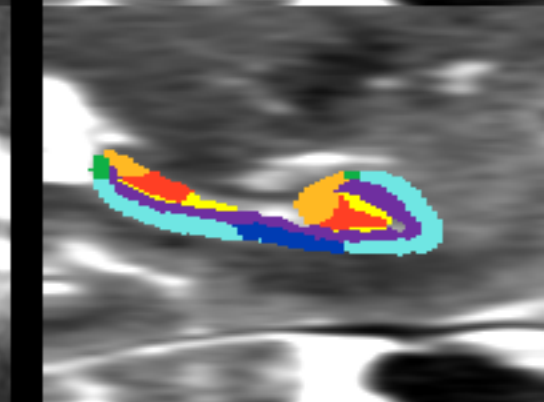

ashs

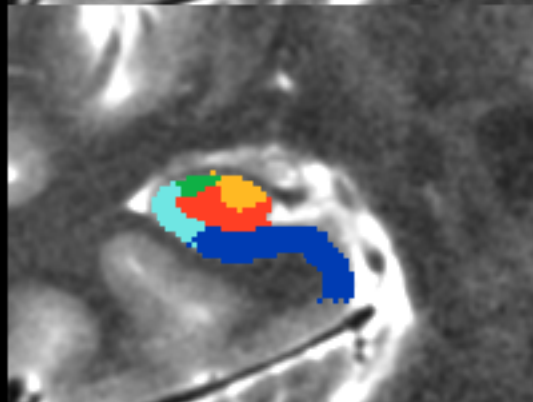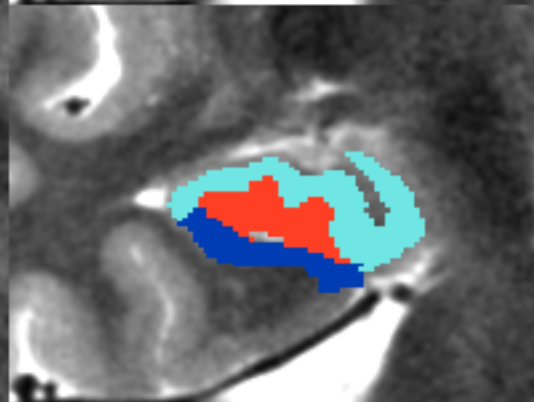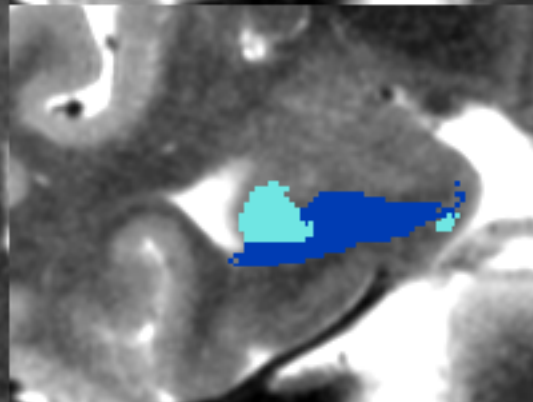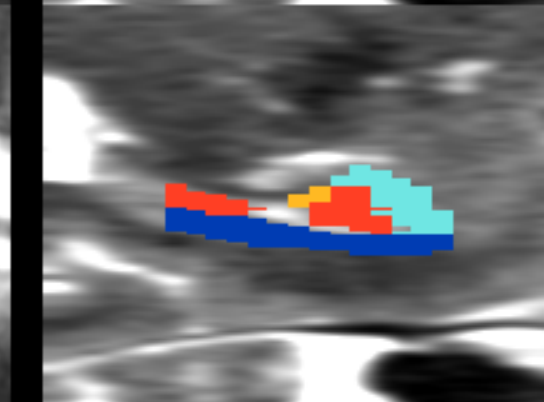

freesurfer

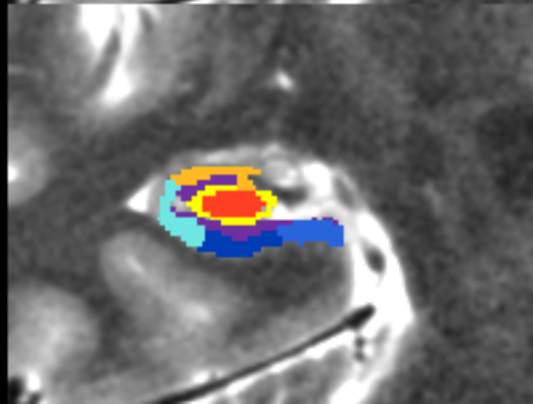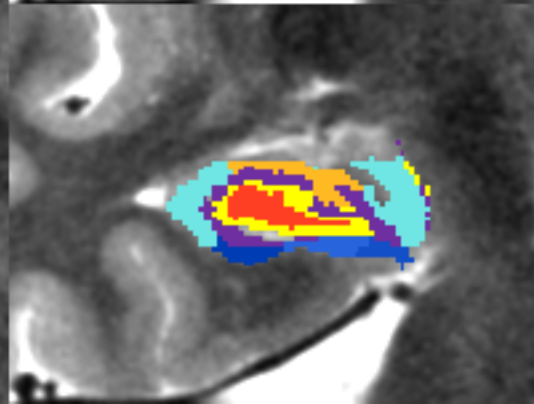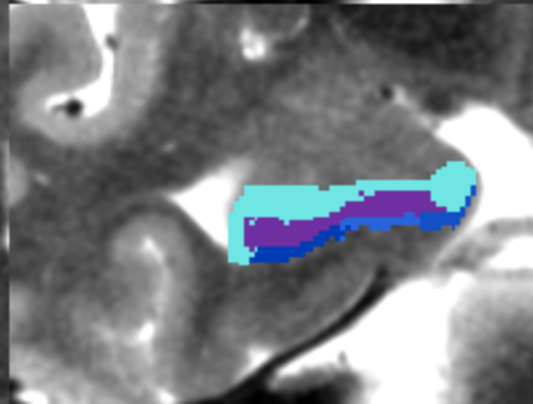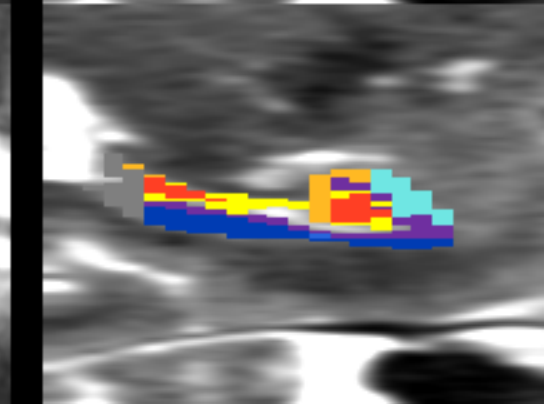

hemi=R,subject=9882308

MRI

hippunfoldT1

ashes

freesurfer

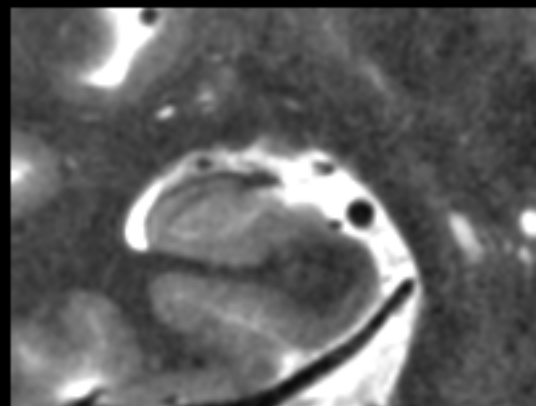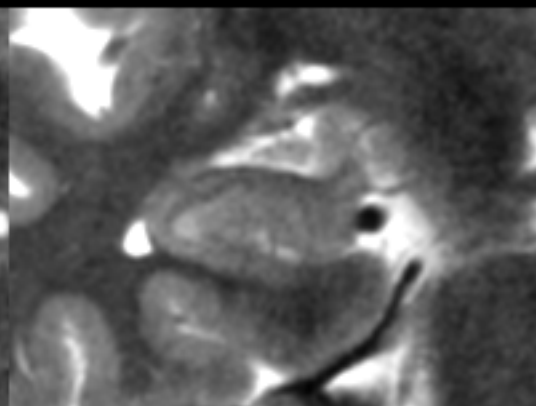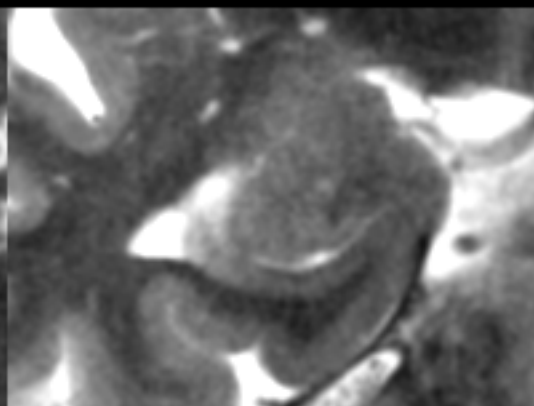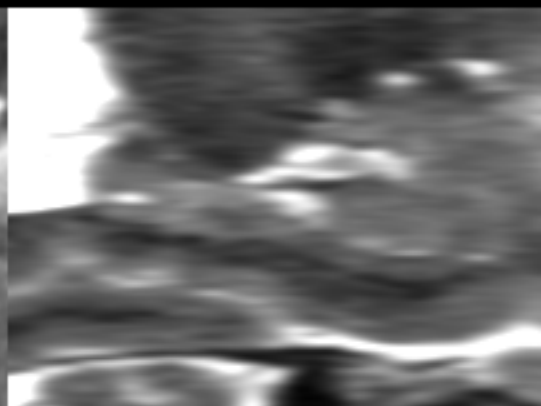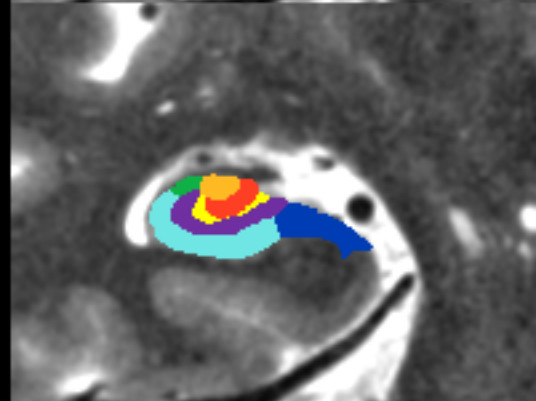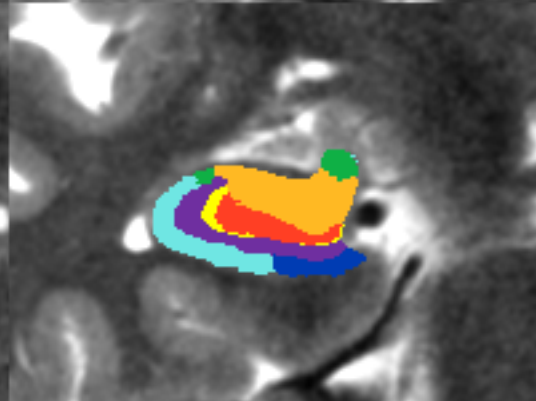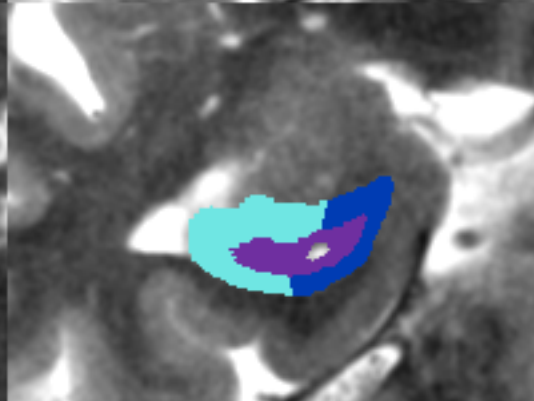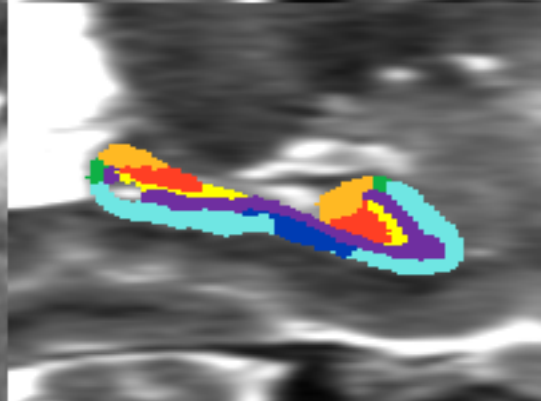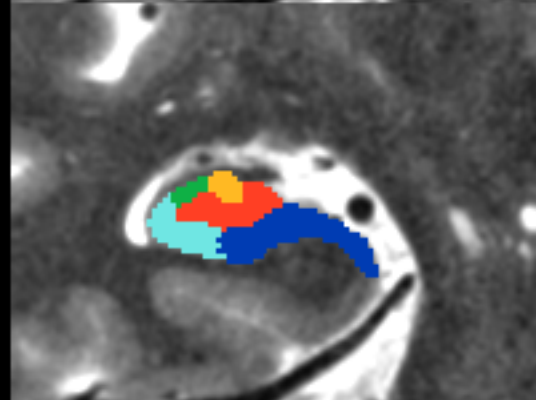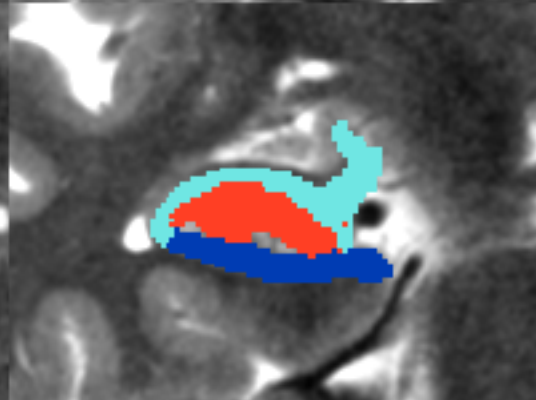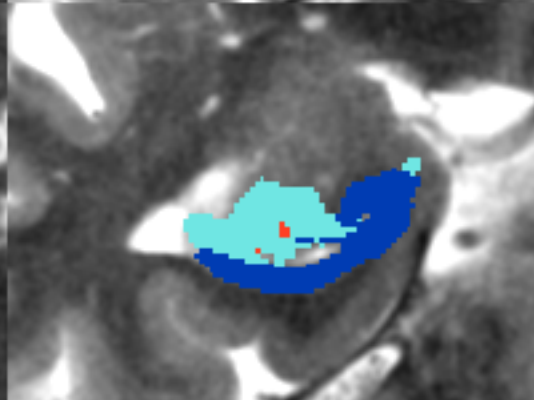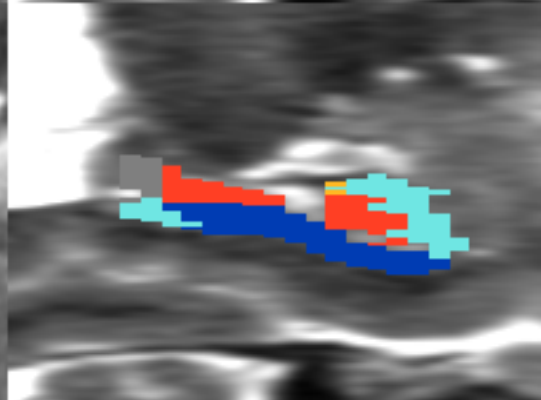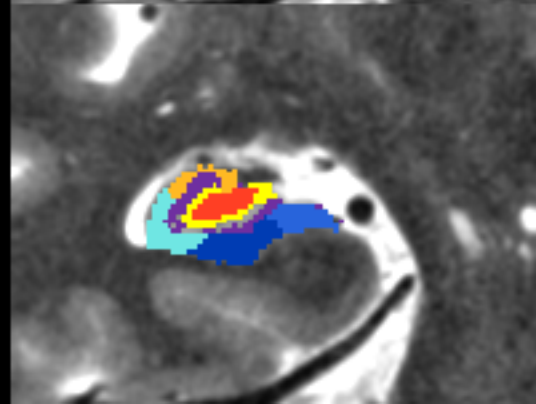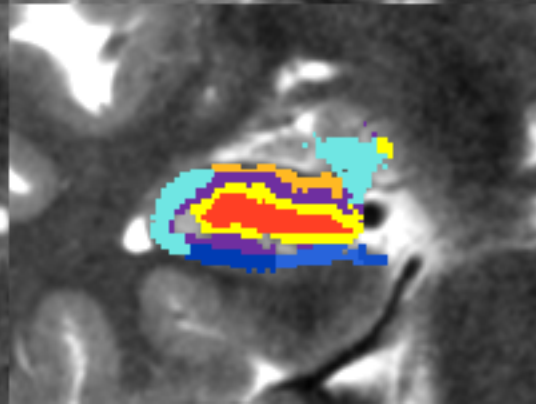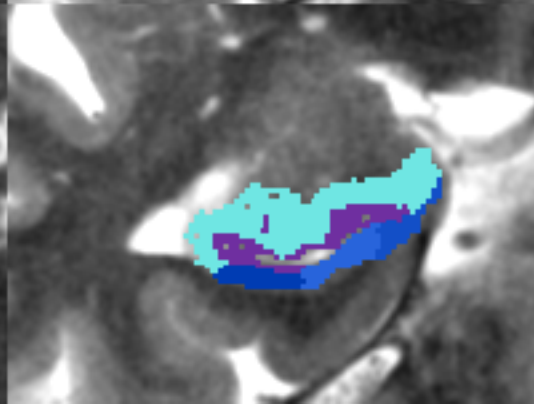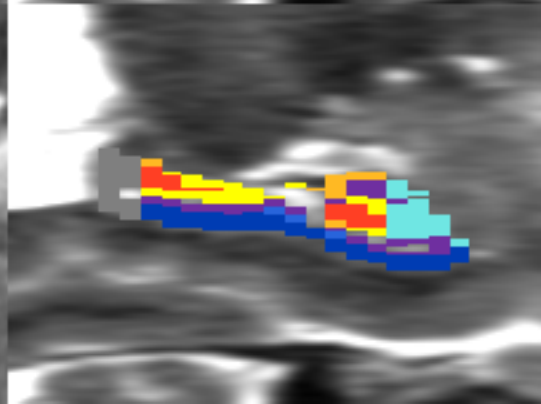



hemi=R,subject=9938814

MRI

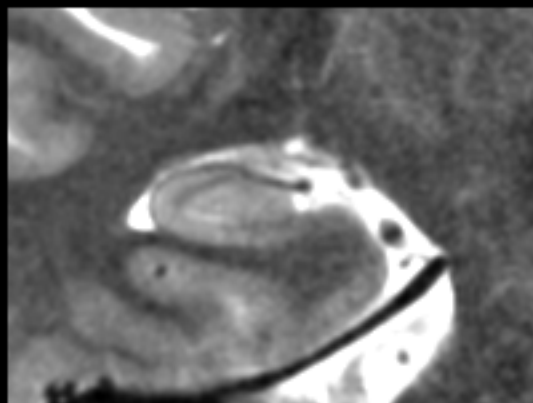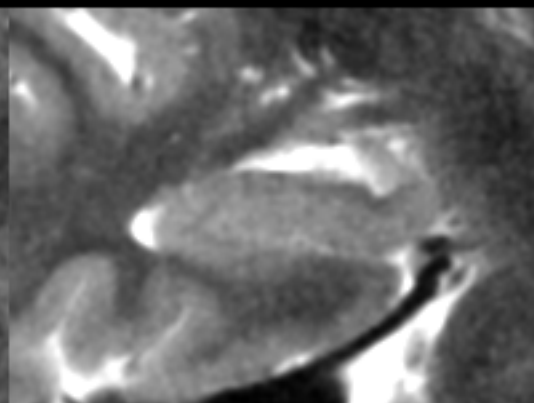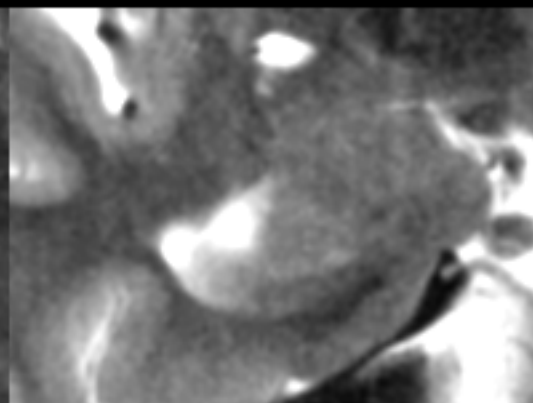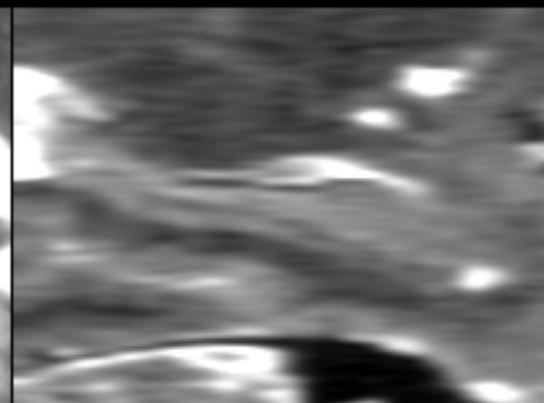

hippunfoldT1

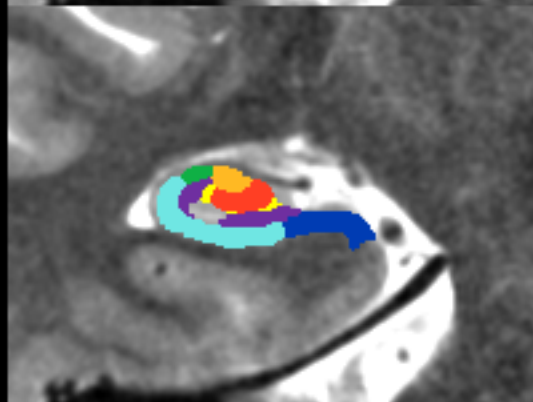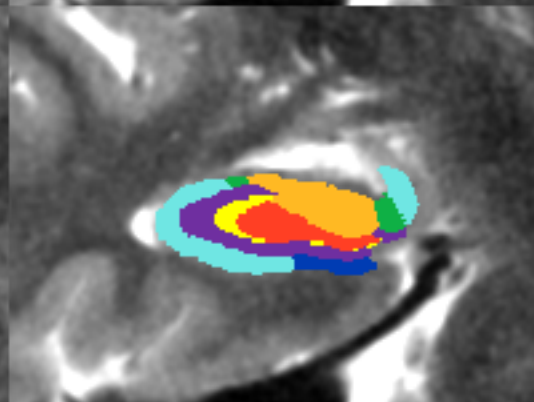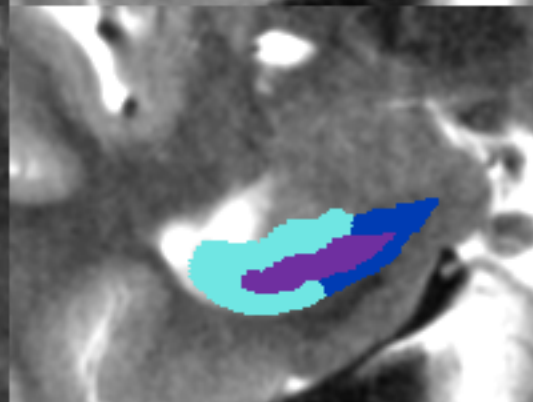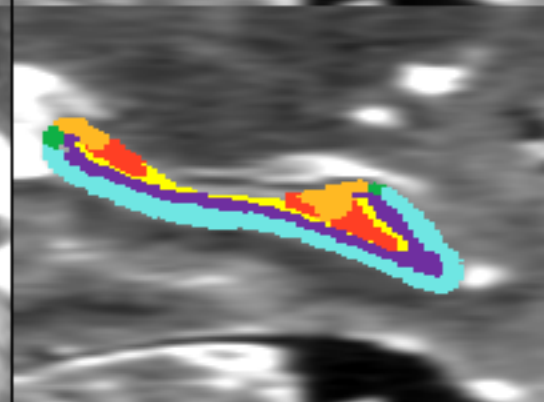

ashs

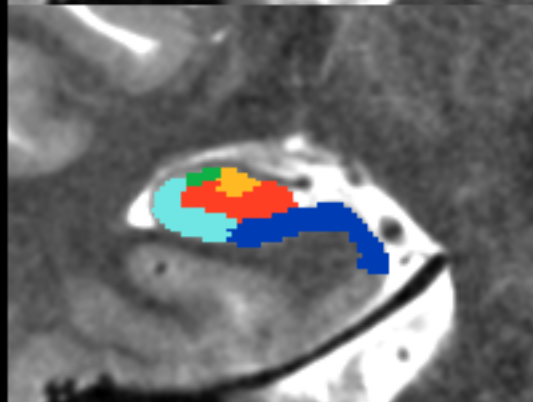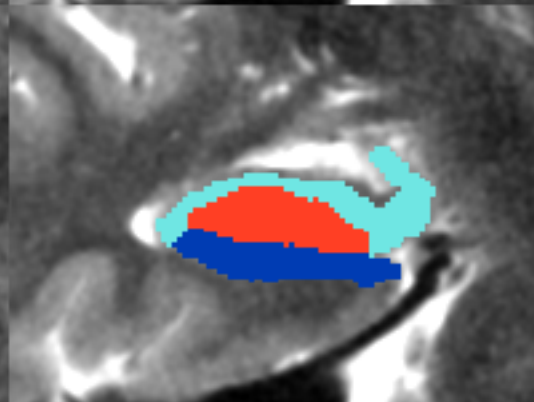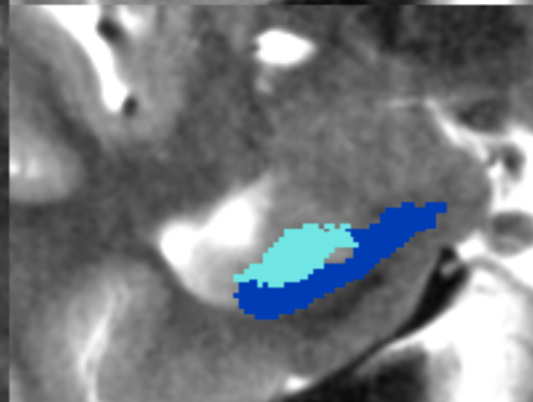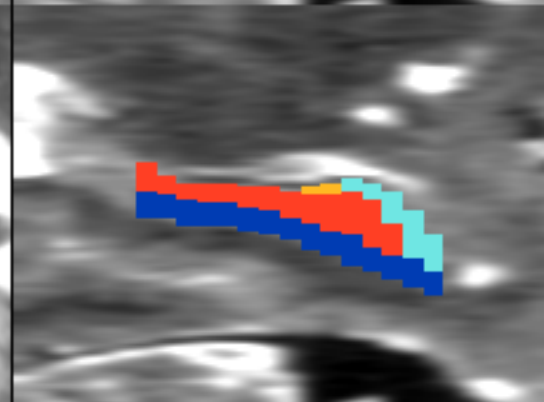

freesurfer

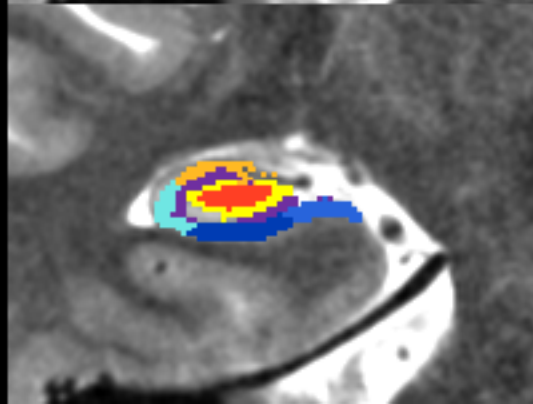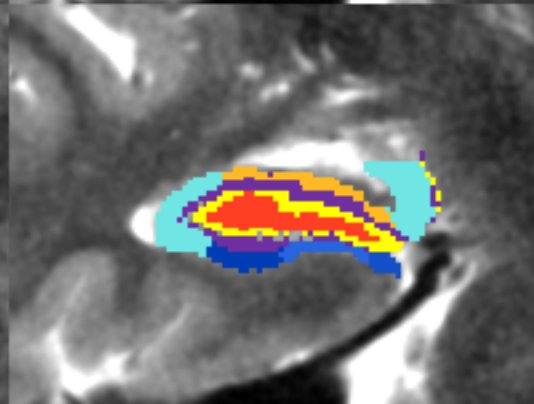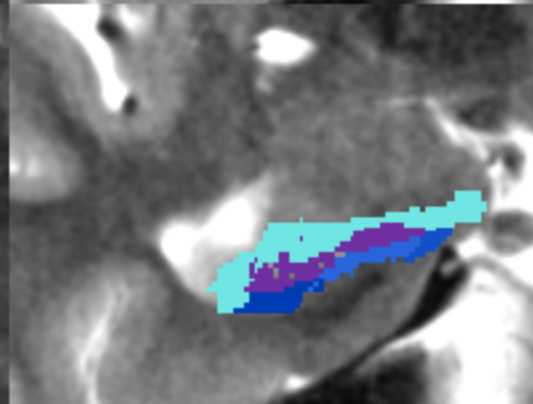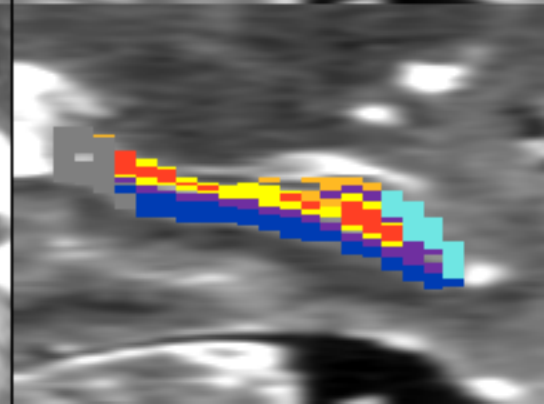

hemi=R,subject=9992517

MRI

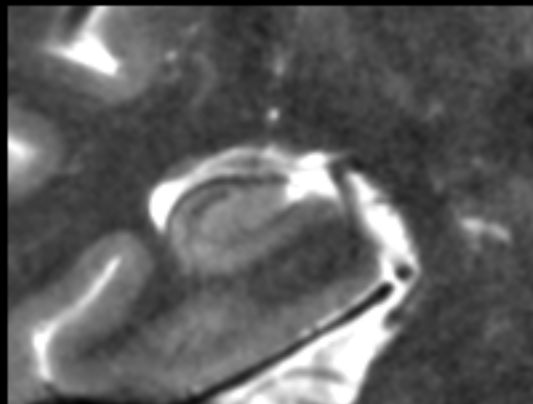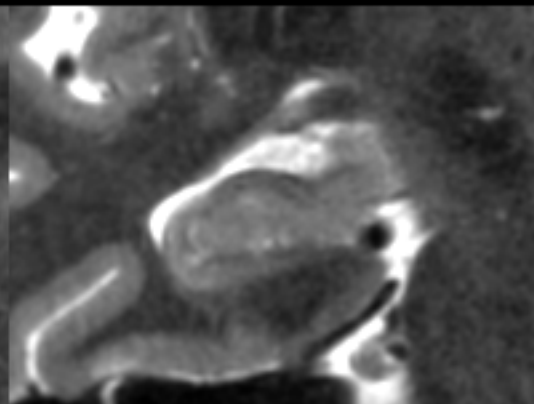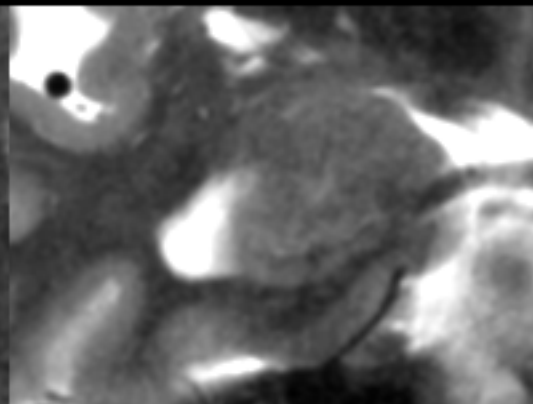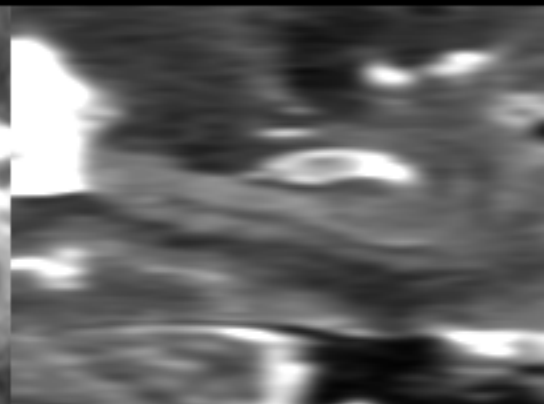

hippunfoldT1

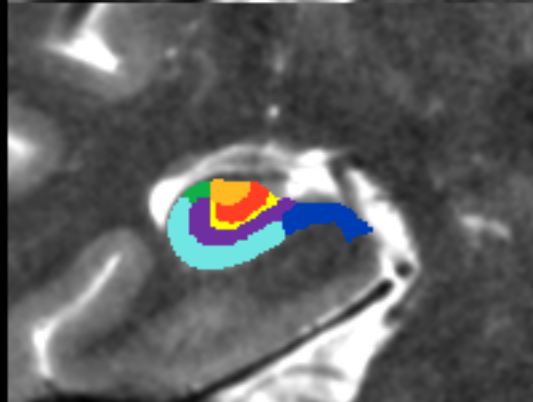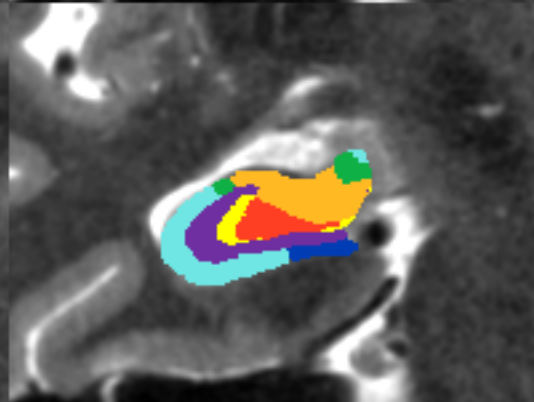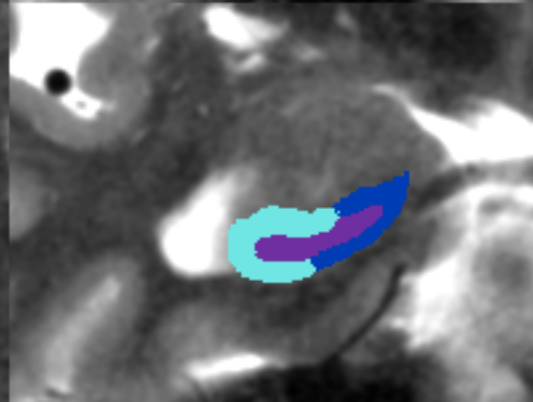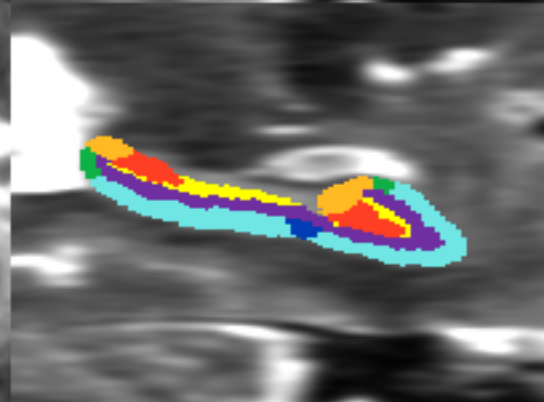

ashs

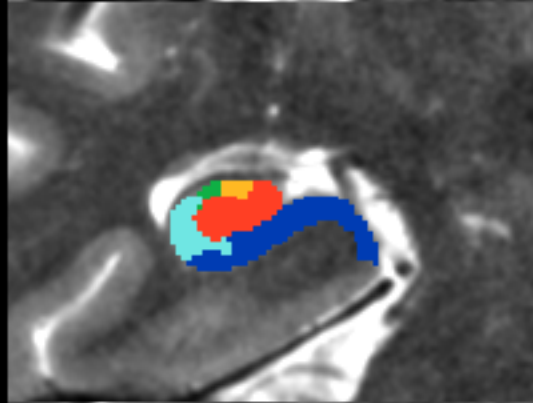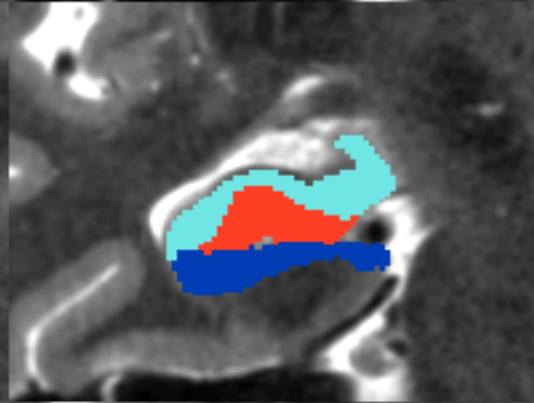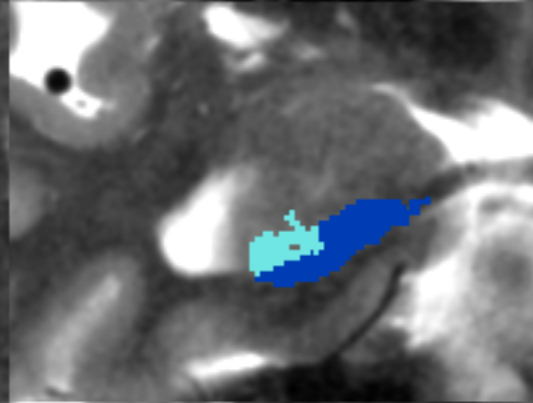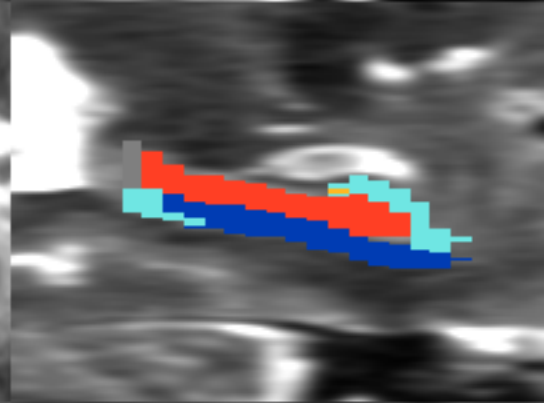

freesurfer

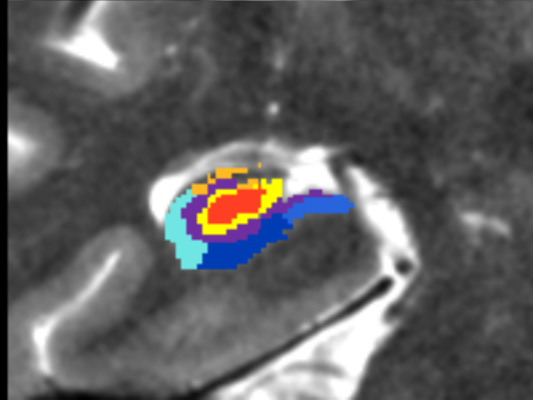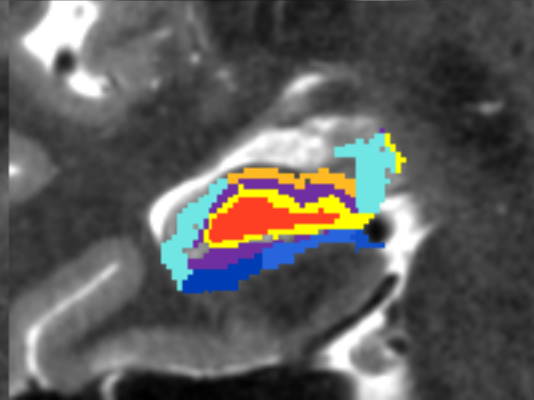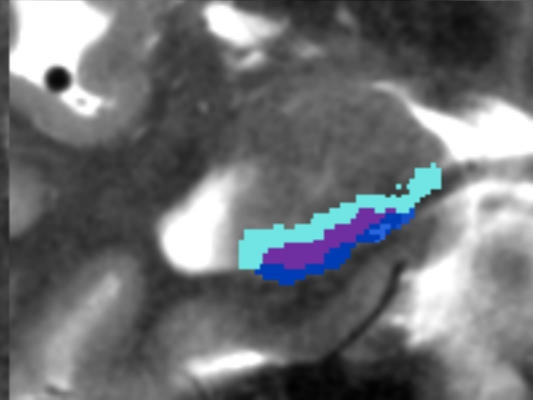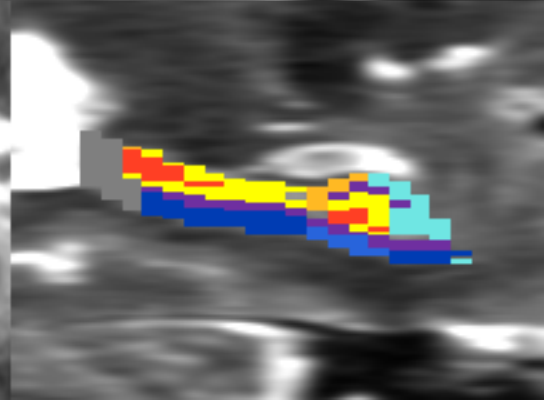

Supplement: elife-77945-supp3.pdf [file elife-77945-supp3.pdf]
